# Supplementary material for: An organism-wide ATAC-seq peak catalog for the bovine and its use to identify regulatory variants
Source: PubMed Central journal article supplement — Genome Res. 2023 Oct;33(10):1848–64. doi: 10.1101/gr.277947.123 (PMC10691486; doi:10.1101/gr.277947.123), 2023-10
Supplement: Supplemental_Fig_S4.pdf [file Supplemental_Fig_S4.pdf]

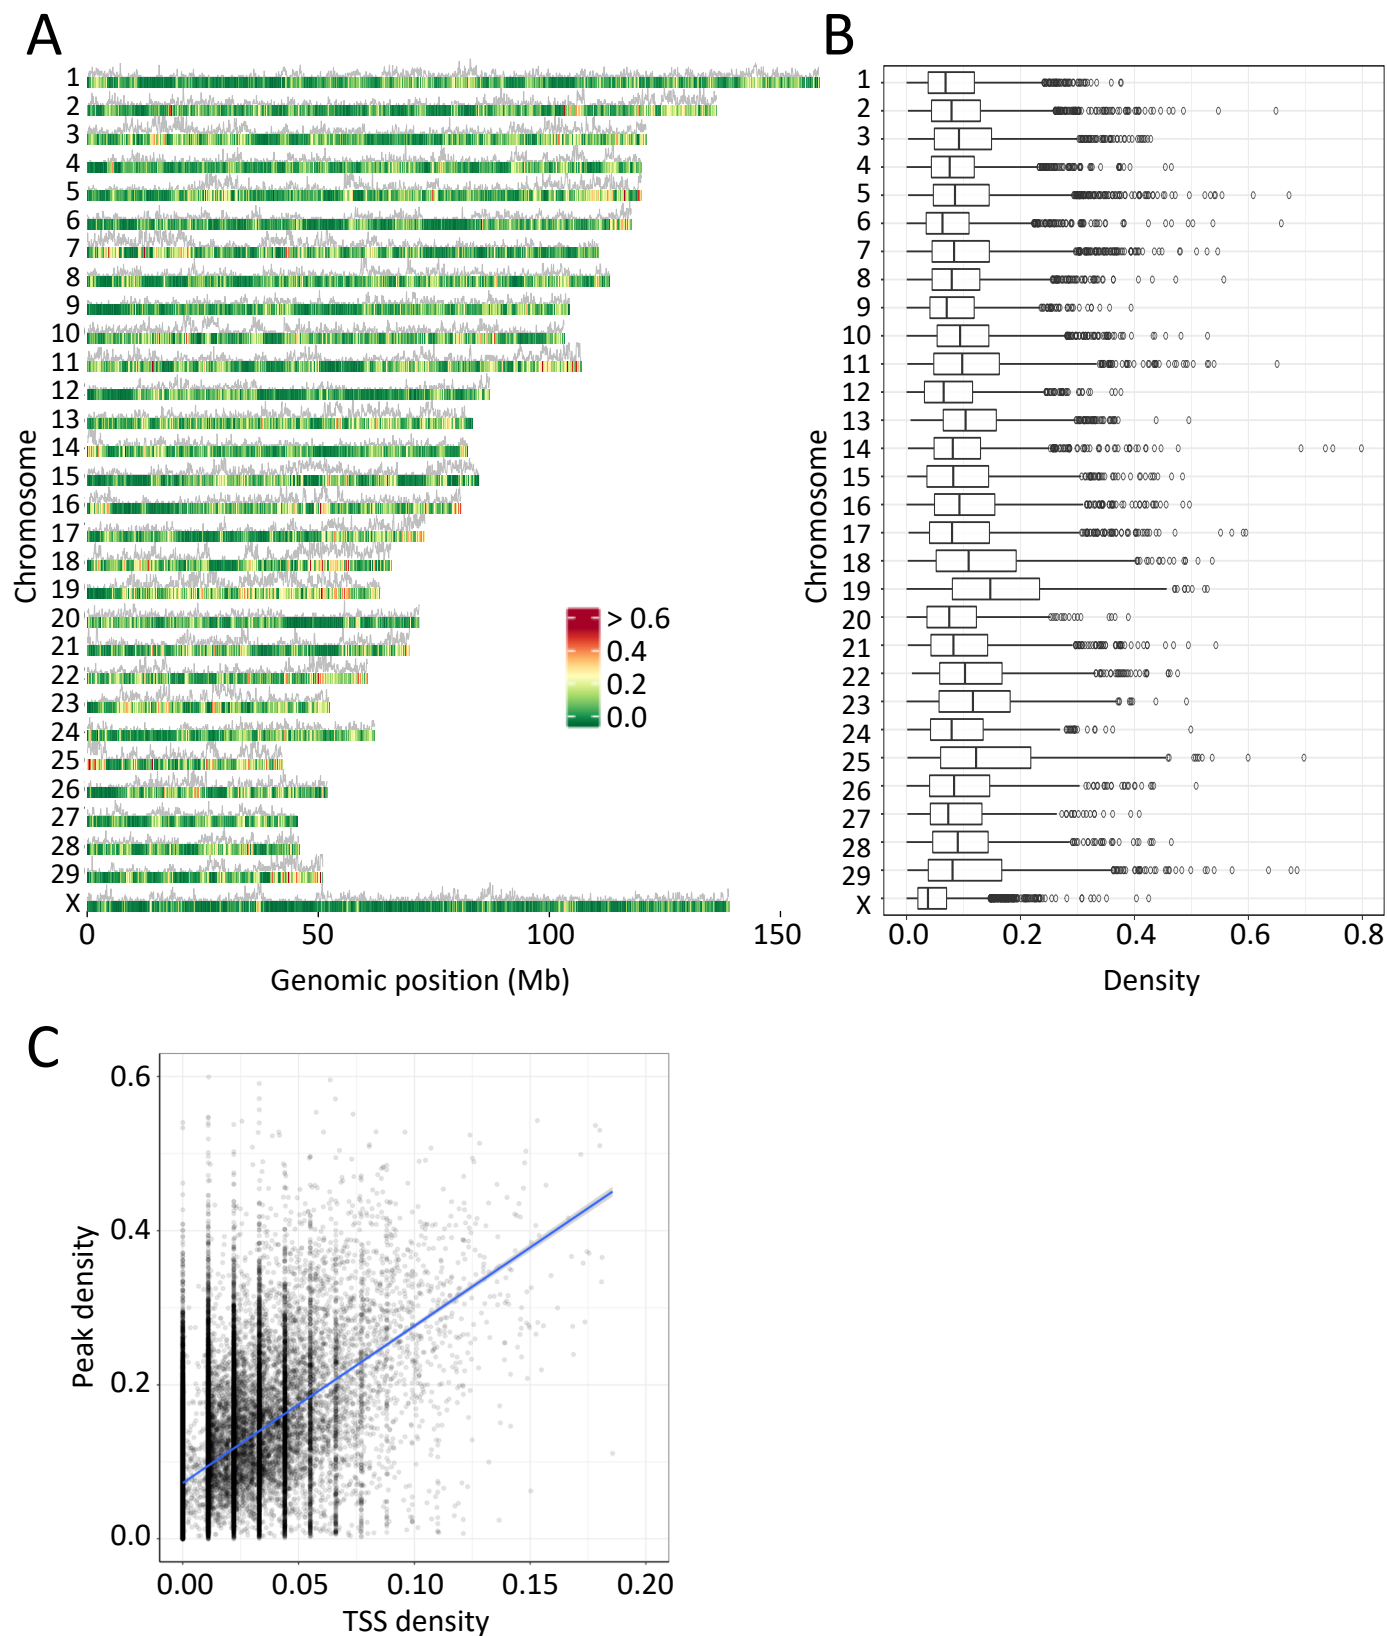

**Supplemental Figure S4: (A)** Density of ATAC-seq peaks (proportion of genome space occupied by ATAC-seq peaks) in 0.1 Mb sliding windows across the bovine genome in pseudo-color (green: low – red: high). Grey curves: density of TSS (number of TSS) in the same 0.1 Mb sliding windows. **(B)** Distribution of density of ATAC-seq peaks in 0.1 Mb sliding windows by chromosome. **(C)** Correlation between TSS (x-axis) and peak (y-axis) density in 0.1 Mb windows ( $r = 0.52$ ).
