# Supplementary material for: An organism-wide ATAC-seq peak catalog for the bovine and its use to identify regulatory variants
Source: PubMed Central journal article supplement — Genome Res. 2023 Oct;33(10):1848–64. doi: 10.1101/gr.277947.123 (PMC10691486; doi:10.1101/gr.277947.123), 2023-10
Supplement: Supplemental_Fig_S5.pdf [file Supplemental_Fig_S5.pdf]

**A**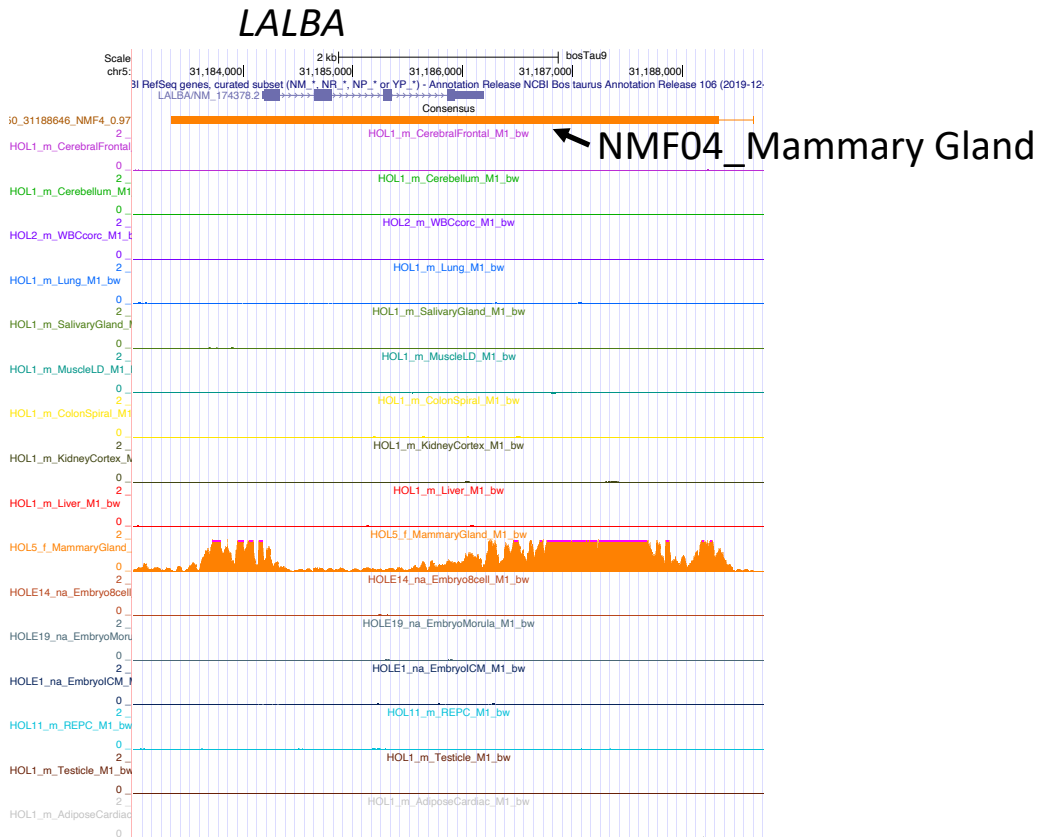**B**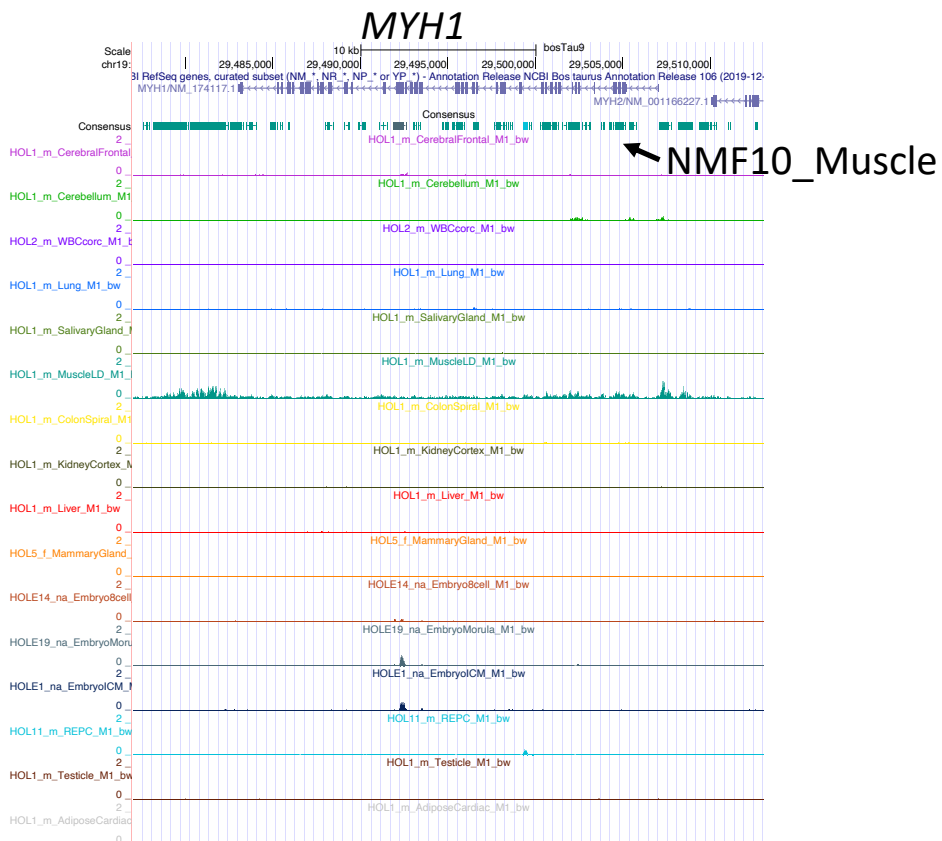

**Supplemental Figure S5:** UCSC Genome Browser view of tissue-type-specific ATAC-seq peaks and their NMF annotations ([https://www.gigauag.uliege.be/cms/c\\_4791343/en/gigauag-diagnostics-software-data](https://www.gigauag.uliege.be/cms/c_4791343/en/gigauag-diagnostics-software-data)) around (A) mammary gland specific gene, *LALBA* (*Lactalbumin Alpha*) and (B) muscle specific gene, *MYH1* (*Myosin Heavy Chain 1*) where chromatin is opened in a tissue specific way across the genes.
