# Supplementary material for: An organism-wide ATAC-seq peak catalog for the bovine and its use to identify regulatory variants
Source: PubMed Central journal article supplement — Genome Res. 2023 Oct;33(10):1848–64. doi: 10.1101/gr.277947.123 (PMC10691486; doi:10.1101/gr.277947.123), 2023-10
Supplement: Supplemental_Fig_S6.pdf [file Supplemental_Fig_S6.pdf]

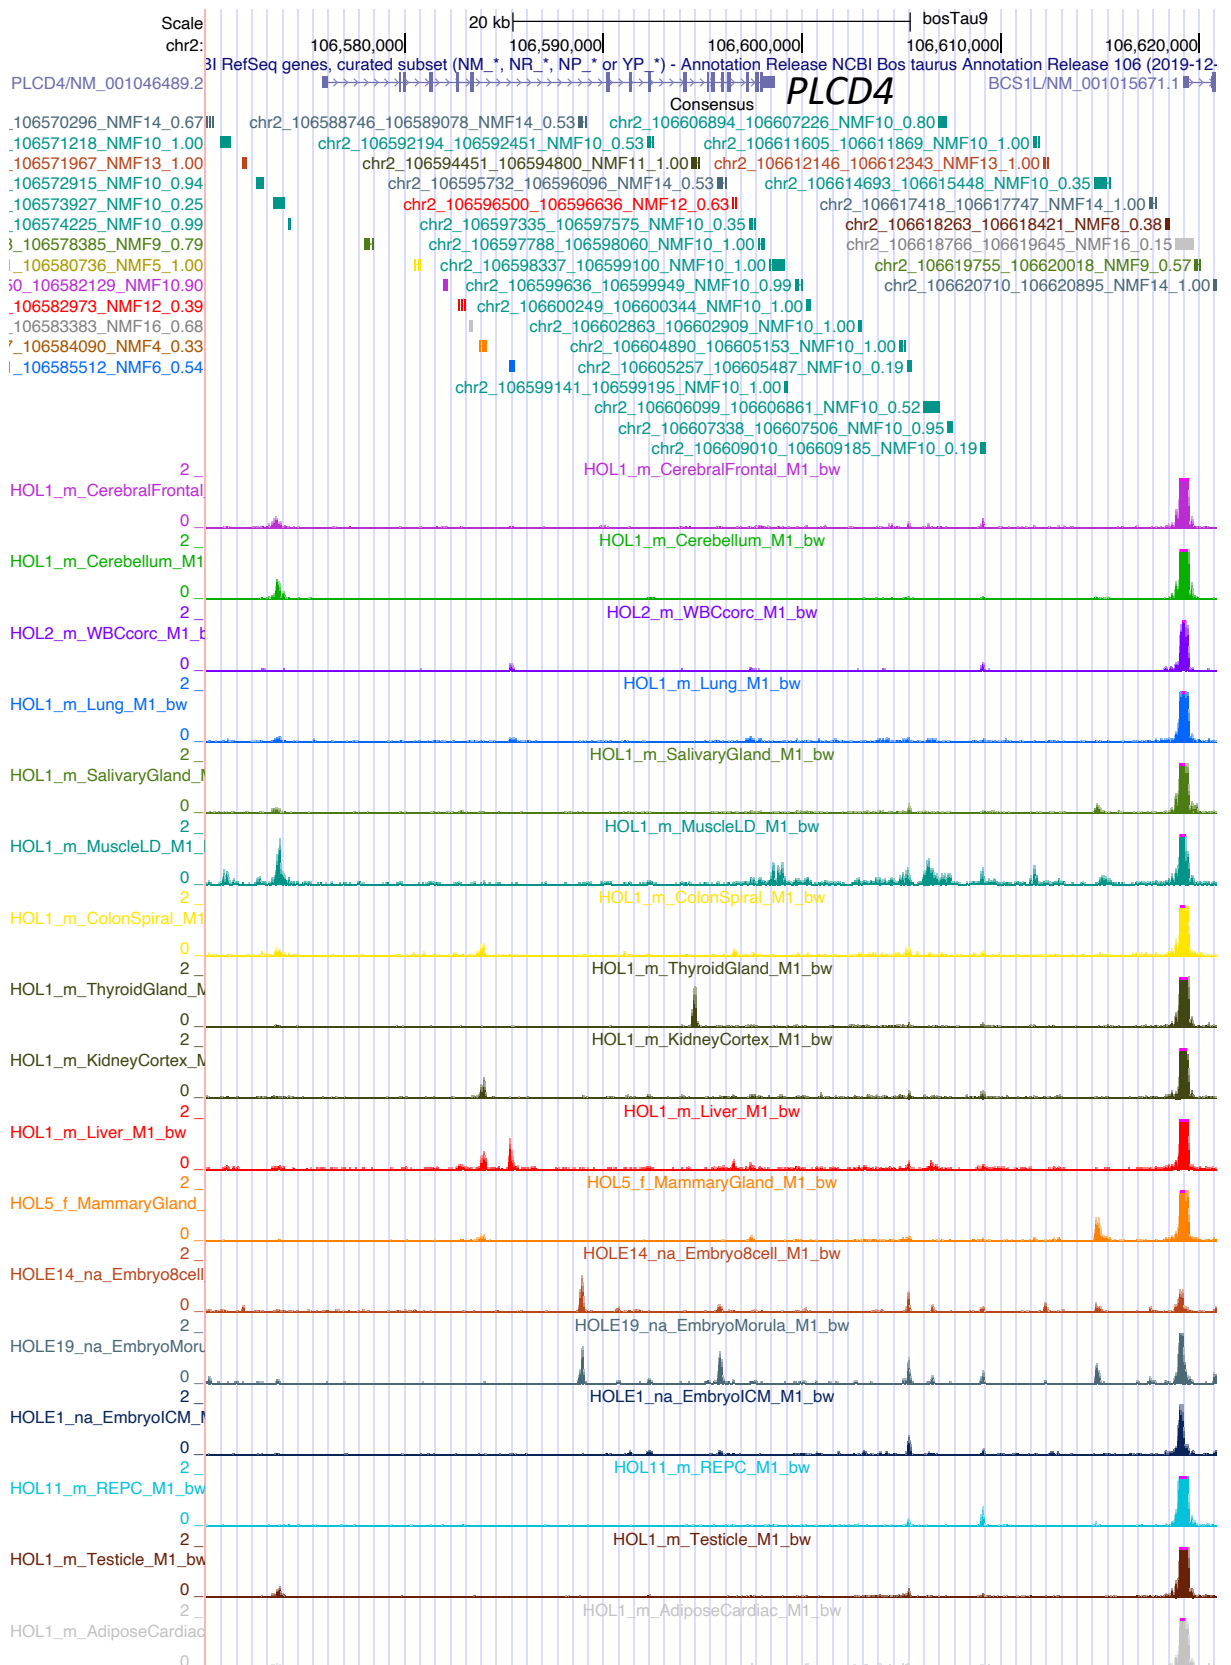

**Supplemental Figure S6:** UCSC Genome Browser view of ATAC-seq peaks and their NMF annotations ([https://www.gigauag.uliege.be/cms/c\\_4791343/en/gigauag-diagnostics-software-data](https://www.gigauag.uliege.be/cms/c_4791343/en/gigauag-diagnostics-software-data)) around *PLCD4* (*Phospholipase C Delta 4*) gene. A recessive mutation in this gene has pleiotropic effects on multiple cow phenotypes (Reynolds *et al.*, 2021). The gene might be regulated by various combinations of shared and tissue-type-specific regulatory elements. Peak names consist of chromosome coordinate, largest NMF component and its weight. Peaks are color-coded as in the main Fig. 1A and F.
