# Supplementary material for: An organism-wide ATAC-seq peak catalog for the bovine and its use to identify regulatory variants
Source: PubMed Central journal article supplement — Genome Res. 2023 Oct;33(10):1848–64. doi: 10.1101/gr.277947.123 (PMC10691486; doi:10.1101/gr.277947.123), 2023-10
Supplement: Supplemental_Fig_S7.pdf [file Supplemental_Fig_S7.pdf]

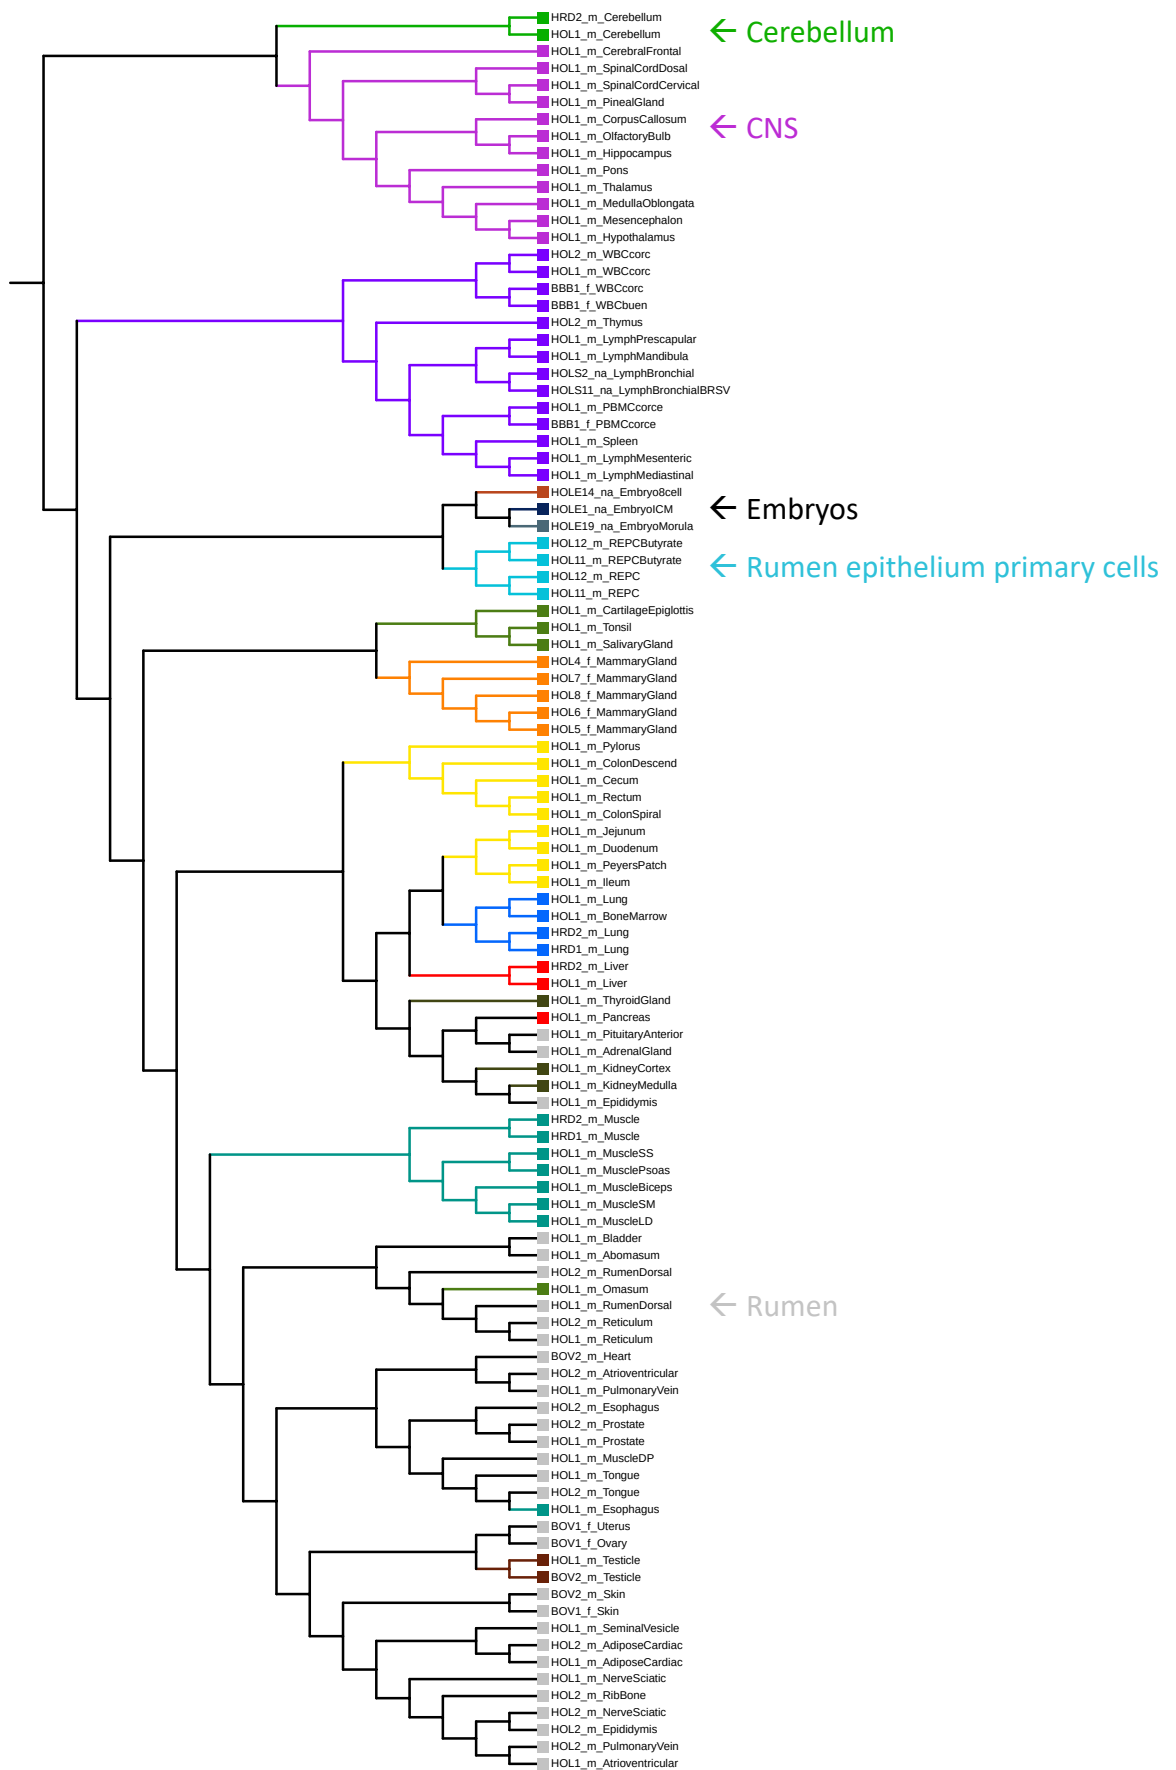

**Supplemental Figure S7:** Hierarchical clustering of the 104 samples using the Ward.D2 method implemented with the `hclust` R function, and the accessibility (measured as the fold-enrichment over genomic DNA background at the nucleotide position in the peak with the highest such value) of 934,972 distal (and hence more tissue specific) peaks. The samples are color-coded by their highest NMF component as in main Fig. 1A and F. Samples discussed in the main text are marked.
