# Supplementary material for: An organism-wide ATAC-seq peak catalog for the bovine and its use to identify regulatory variants
Source: PubMed Central journal article supplement — Genome Res. 2023 Oct;33(10):1848–64. doi: 10.1101/gr.277947.123 (PMC10691486; doi:10.1101/gr.277947.123), 2023-10
Supplement: Supplemental_Fig_S9.pdf [file Supplemental_Fig_S9.pdf]

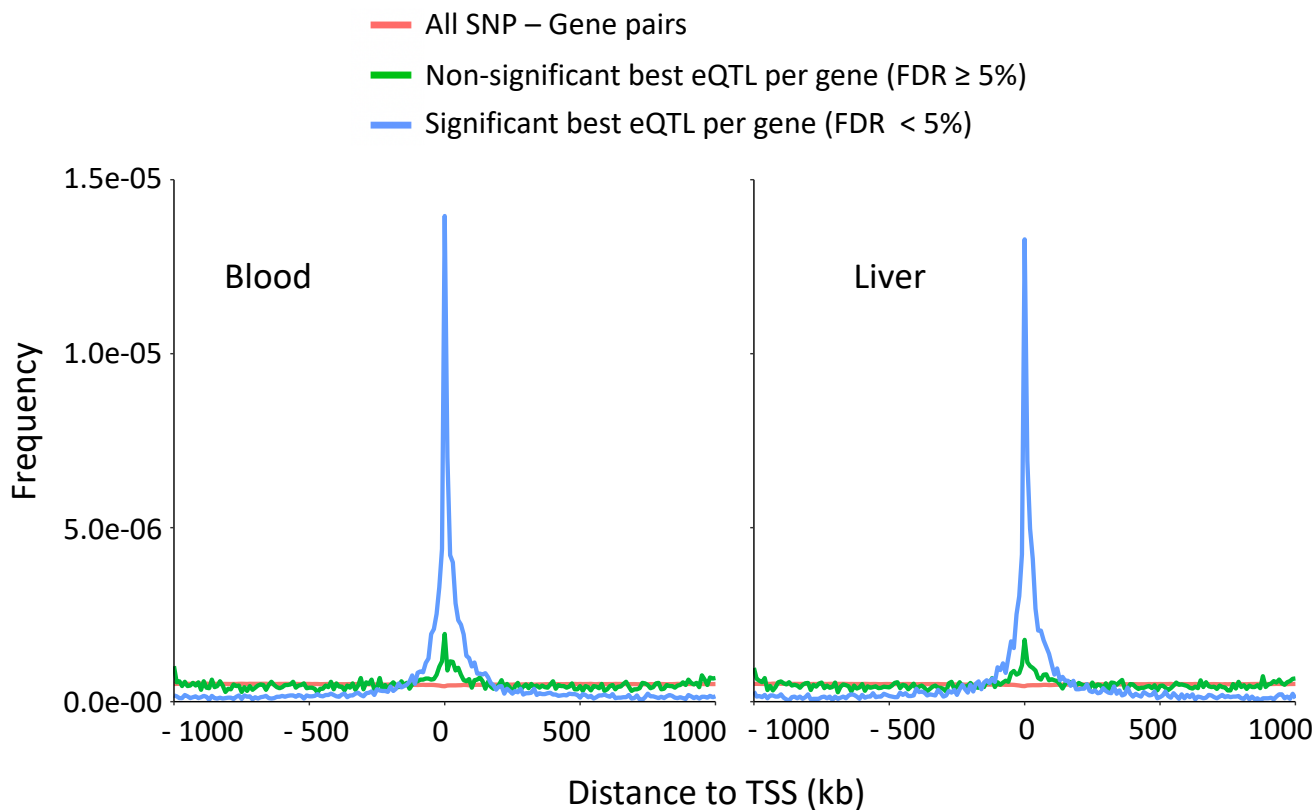

**Supplemental Figure S9:** Frequency distribution of the positions, with respect to the TSSs, of the lead eQTL SNVs for significant eQTL (blue), the lead eQTL SNVs for non-significant eQTL (green), and all SNVs.
