# Supplementary material for: An organism-wide ATAC-seq peak catalog for the bovine and its use to identify regulatory variants
Source: HighWire-hosted journal article supplement (doi:10.1101/gr.277947.123), 2023-09-26
Supplement: Supplemental_Table_S1.xlsx [file Supplemental_Table_S1.xlsx]

## Sheet: STable_S1_ATAC_Animal
Suppl. Table S1: Information of animals and ATAC-seq data ued in this work.
	Animal_ID	Data Accession No.	Sample No. tested	Sample No. used	Breed	Sex	Age
In-house data	HOL1	E-MTAB-11825 an E-MTAB-11826, this study. E-MTAB-9872, Lee et al. PLoS Genet. (2021)	77	62	Holstein	male	1 month old
	HOL2	E-MTAB-11825, this study	14	13	Holstein	male	1 month old
	BBB1	E-MTAB-11825, this study	4	3	Belgian Blue	female	6 years old
	HOL4	E-MTAB-11825, this study	1	1	Holstein-Friesian Jersey	female	adult
	HOL5	E-MTAB-11825, this study	1	1	Holstein-Friesian Jersey	female	adult
	HOL6	E-MTAB-11825, this study	1	1	Holstein-Friesian Jersey	female	adult
	HOL7	E-MTAB-11825, this study	1	1	Holstein-Friesian Jersey	female	adult
	HOL8	E-MTAB-11825, this study	1	1	Holstein-Friesian Jersey	female	adult
	BOV1	E-MTAB-11825, this study	3	3	unknown	female	2 months old
	BOV2	E-MTAB-11825, this study	3	3	unknown	male	calf
			Subtotal 106	Subtotal 89
Public data	HRD1	PRJNA665194, Halstead et al. BMC Genomics (2020)	-	2	Hereford	male	14 months old
	HRD2	PRJNA665194, Halstead et al. BMC Genomics (2020)	-	4	Hereford	male	14 months old
	HOLS2	PRJNA622966, Johnston et al. BMC Genomics (2021)	-	1	Holstein	male	143 ± 14 days
	HOLS11	PRJNA622966, Johnston et al. BMC Genomics (2021)	-	1	Holstein	male	143 ± 14 days
	HOLE1	PRJNA601200, PRJNA595394, Halstead et al. Nat. Commun. (2020)	-	1	unknown	mix	Embryo ICM
	HOLE14	PRJNA601200, PRJNA595394, Halstead et al. Nat. Commun. (2020)	-	1	unknown	mix	Embryo 8-cell
	HOLE19	PRJNA601200, PRJNA595394, Halstead et al. Nat. Commun. (2020)	-	1	unknown	mix	Embryo Morula
	HOL11	PRJNA531214, Fang et al. BMC Biol. (2019)	-	2	Holstein	male	2 weeks old
	HOL12	PRJNA531214, Fang et al. BMC Biol. (2019)	-	2	Holstein	male	2 weeks old
