# Supplementary material for: An organism-wide ATAC-seq peak catalog for the bovine and its use to identify regulatory variants
Source: HighWire-hosted journal article supplement (doi:10.1101/gr.277947.123), 2023-09-26
Supplement: Supplemental_Table_S2.xlsx [file Supplemental_Table_S2.xlsx]

## Sheet: STable_S2_ATAC_Sample
Suppl. Table S2: The number of ATAC-seq data per tissue-type and animal.
	No. of ATAC-seq data after QC
	per Tissue-type	In-house ATAC-seq data										Public ATAC-seq data
		HOL1_m	HOL2_m	BBB1_f	BOV1_f	BOV2_m	HOL4_f	HOL5_f	HOL6_f	HOL7_f	HOL8_f	HRD1_m	HRD2_m	HOLS11	HOLS2	HOLE1	HOLE14	HOLE19	HOL11_m	HOL12_m
Cerebral frontal	1	1
Mesencephalon	1	1
Corpus callosum	1	1
Thalamus	1	1
Hypothalamus	1	1
Pituitary anterior	1	1
Olfactory bulb	1	1
Hippocampus	1	1
Pineal gland	1	1
Cerebellum	2	1											1
Pons	1	1
Medulla oblongata	1	1
Spinal cord: Cervical, Dosal	2	2
Nerve: Brachial plexus, Sciatic	2	1, QC failed	1
Retina	0	QC failed
Tongue	2	1	1
Salivary gland	1	1
Tonsil	1	1
Cartilage epiglottis	1	1
Trachea	0	QC failed
Thyroid gland	1	1
Thymus	1	QC failed	1
Lung	3	1										1	1
Spleen	1	1
Bone marrow	1	1
Lymph node: Mandibula, Mediastinal, Mesenteric, Prescapular, Bronchial	5	4													1
Lymph node bronchial challenged with Bovine Respiratory Syncytial Virus (BRSV)	1													1
Peripheral blood mononuclear cells (PBMC): with the method Corces et al., Buenrostro et al.	2	1		1, QC failed
White blood cells (WBC): with the method Corces et al., Buenrostro et al.	4	1	1	2
Heart: Atrioventricular valve, Atrium, Ventricle, Heart undefined	3	1, QC failed, QC failed	1			1
Vein: Aorta thoracic, Caudal vena cava, Pulmonary vein	2	1, QC failed, QC failed	1
Adipose cardiac	2	1	1
Esophagus	2	1	1
Rumen: Dorsal, Ventral	2	1, QC failed	1
Rumen Epithelial Primary Cells (REPC)	2																		1	1
Rumen Epithelial Primary Cells (REPC) after Butyrate treatments	2																		1	1
Reticulum	2	1	1
Omasum	1	1	QC failed
Abomasum	1	1
Liver	2	1											1
Gallbladder	0	QC failed
Pancreas	1	1
Pylorus	1	1
Duodenum	1	1
Jejunum	1	1
Ileum	1	1
Peyers Patch	1	1
Cecum	1	1
Colon: Descend, Spiral	2	2
Rectum	1	1
Adrenal Gland	1	1
Kieney: Cortex, Medulla	2	2
Bladder	1	1
Urethra	0	QC failed
Muscle: Biceps femoris, Diaphragm, Intercostal, Infraspinatus, Longissimus dorsi, Psoas major, Semimembranosus, Supraspinatus, Muscle undefined	8	6, QC failed, QC failed										1	1
Rib bone cartilage	1	QC failed	1
Skin	2				1	1
Prostate	2	1	1
Testis	2	1				1
Epididymis	2	1	1
Seminal vesicle	1	1
Vas deferens	0	QC failed
Ovary	1				1
Uterus	1				1
Mammary gland	5						1	1	1	1	1
Embryo 8-cell stage	1																1
Embryo Morula	1																	1
Embryo Inner Cell Mass (ICM)	1															1
Final after QC	63 tissue-types	62	13	3	3	3	1	1	1	1	1	2	4	1	1	1	1	1	2	2
		89										15
		104
