# Supplementary material for: An organism-wide ATAC-seq peak catalog for the bovine and its use to identify regulatory variants
Source: HighWire-hosted journal article supplement (doi:10.1101/gr.277947.123), 2023-09-26
Supplement: Supplemental_Table_S6.xlsx [file Supplemental_Table_S6.xlsx]

## Sheet: STable_S6_peak_per_NMF_comp
Suppl. Table S6: Sumary statistics of ATAC-seq peak numbers and sizes for all peaks, proximal peaks (peaks located from 1 kb upstream to 100 bp downstream of transcription start sites (TSSs) based on the Ensembl gene annotation file "bosTau9.ensGene.gtf" v101 from UCSC), proximal peaks of housekeeping genes (3,639 orthologues of human housekeeping genes reported in Joshi et al. 2022), and distal …
	Peaks							Proximal peaks										Proximal peaks of housekeeping genes										Distal peaks
NMF component class	Number	Proportion of peak number in total	Total size (Mb)	Mean size (bp)	Median size (bp)	Min size (bp)	Max size (bp)	Number	Proportion of the peak number in total	Proportion of the peak number in proximal peaks	Enrichment of a given class of peaks in "Proximal to TSS"	Total size (Mb)	Mean size (bp)	Median size (bp)	Min size (bp)	Max size (bp)	Proportion of the peak number in a given NMF class	Number	Proportion of the peak number in total	Proportion of the peak number in proximal peaks of housekeeping genes	Enrichment of a given class of peaks in "Proximal of houekeeping gene TSS"	Total size (Mb)	Mean size (bp)	Median size (bp)	Min size (bp)	Max size (bp)	Proportion of the peak number in a given NMF class	Number	Proportion of the peak number in total	Proportion of the peak number in distal peaks	Enrichment of a given class of peaks in "Distal to TSS"	Total size (Mb)	Mean size (bp)	Median size (bp)	Min size (bp)	Max size (bp)	Proportion of the peak number in a given NMF class	NMF component class
NMF01_Central nervous system (CNS)	72809	0.0745	16735464	230	186	38	7528	2339	0.00239	0.0559021	0.749988	625347	267	182	38	4430	0.0321251	324	0.000332	0.0398769	0.534993	59111	182	129	38	1420	0.00445	70470	0.0721	0.0753712	1.01119	16110117	229	186	38	7528	0.967875	NMF01_Central nervous system (CNS)
NMF02_Ruminal epithelium	75278	0.0771	19243483	256	210	38	8127	1932	0.00198	0.0461748	0.599168	450600	233	187	39	2312	0.0256649	275	0.000282	0.0338462	0.43919	57192	208	179	41	966	0.00365313	73346	0.0751	0.0784473	1.01794	18792883	256	211	38	8127	0.974335	NMF02_Ruminal epithelium
NMF03_Immune system	80165	0.0821	17211092	215	188	38	6928	3013	0.00308	0.0720107	0.877453	679861	226	171	38	6928	0.037585	534	0.000547	0.0657231	0.800838	91277	171	128	38	1345	0.00666126	77152	0.079	0.082518	1.00548	16531231	214	189	38	4516	0.962415	NMF03_Immune system
NMF04_Mammary Gland	54486	0.0558	16276277	299	245	38	12797	1703	0.00174	0.0407017	0.729691	581018	341	256	38	10199	0.0312557	317	0.000325	0.0390154	0.699459	94670	299	243	38	1661	0.00581801	52783	0.054	0.0564541	1.0121	15695259	297	245	38	12797	0.968744	NMF04_Mammary Gland
NMF05_Digestive tract	26108	0.0267	6336457	243	222	38	5744	649	0.000664	0.0155111	0.580337	183510	283	245	38	1550	0.0248583	65	6.65e-05	0.008	0.299315	14851	228	220	46	569	0.00248966	25459	0.0261	0.0272297	1.01878	6152947	242	222	38	5744	0.975142	NMF05_Digestive tract
NMF06_Lower respiratory	49396	0.0506	13344898	270	235	38	7216	1285	0.00132	0.0307115	0.607324	386020	300	244	38	3947	0.0260143	165	0.000169	0.0203077	0.401588	49987	303	242	43	1401	0.00334035	48111	0.0493	0.0514572	1.01757	12958878	269	235	38	7216	0.973986	NMF06_Lower respiratory
NMF07_Cerebellum	78237	0.0801	19324286	247	186	38	3559	1912	0.00196	0.0456968	0.570539	495799	259	181	38	3559	0.0244386	239	0.000245	0.0294154	0.36726	45222	189	136	38	1022	0.00305482	76325	0.0781	0.0816335	1.01922	18828487	247	186	38	3178	0.975561	NMF07_Cerebellum
NMF08_Testis	47012	0.0481	13955800	297	248	38	10104	1398	0.00143	0.0334122	0.694237	405317	290	219	38	3002	0.0297371	233	0.000239	0.0286769	0.595848	52929	227	175	38	1212	0.00495618	45614	0.0467	0.0487865	1.01368	13550483	297	249	38	10104	0.970263	NMF08_Testis
NMF09_Upper respiratory	36772	0.0376	10139567	276	244	38	9953	833	0.000853	0.0199087	0.528856	255674	307	246	38	8334	0.0226531	94	9.62e-05	0.0115692	0.307326	24233	258	224	46	1117	0.00255629	35939	0.0368	0.0384386	1.02108	9883893	275	244	38	9953	0.977347	NMF09_Upper respiratory
NMF10_Muscle	41999	0.043	11814248	281	236	38	5306	1250	0.00128	0.029875	0.694833	468783	375	266	38	4318	0.0297626	136	0.000139	0.0167385	0.389303	37552	276	210	38	1466	0.00323817	40749	0.0417	0.0435831	1.01366	11345465	278	236	38	5306	0.970237	NMF10_Muscle
NMF11_Endocrine	41389	0.0424	10164655	246	216	38	6761	774	0.000792	0.0184986	0.436582	204333	264	224	38	2653	0.0187006	86	8.8e-05	0.0105846	0.249805	21101	245	202	38	750	0.00207785	40615	0.0416	0.0434398	1.02521	9960322	245	215	38	6761	0.981299	NMF11_Endocrine
NMF12_Liver	26219	0.0268	6558794	250	217	38	3769	915	0.000937	0.0218685	0.814731	294791	322	269	38	3769	0.0348984	100	0.000102	0.0123077	0.458534	26542	265	224	40	910	0.00381403	25304	0.0259	0.0270639	1.00829	6264003	248	216	38	3513	0.965102	NMF12_Liver
NMF13_8-cell stage embryo	54911	0.0562	10926755	199	175	38	2760	1364	0.0014	0.0325996	0.579915	308732	226	194	38	1509	0.0248402	305	0.000312	0.0375385	0.667773	69607	228	203	81	662	0.00555444	53547	0.0548	0.0572712	1.0188	10618023	198	174	38	2760	0.97516	NMF13_8-cell stage embryo
NMF14_Morula embryo	144286	0.148	37946667	263	224	38	7443	2729	0.00279	0.0652231	0.441559	813054	298	242	54	4049	0.0189138	305	0.000312	0.0375385	0.254135	84631	277	246	91	1046	0.00211386	141557	0.145	0.151402	1.02499	37133613	262	224	38	7443	0.981086	NMF14_Morula embryo
NMF15_Inner cell mass (ICM) embryo	14108	0.0144	2984217	212	188	38	1711	324	0.000332	0.0077436	0.536153	70988	219	188	51	1016	0.0229657	44	4.5e-05	0.00541538	0.374952	8485	193	156	70	765	0.0031188	13784	0.0141	0.0147427	1.02076	2913229	211	188	38	1711	0.977034	NMF15_Inner cell mass (ICM) embryo
NMF16_Undefined	26414	0.027	5450662	206	156	38	4375	597	0.000611	0.0142683	0.527654	139089	233	146	38	4375	0.0226017	59	6.04e-05	0.00726154	0.268538	8156	138	78	38	1432	0.00223366	25817	0.0264	0.0276126	1.02114	5311573	206	156	38	3715	0.977398	NMF16_Undefined
Ubiquitous	107224	0.11	45533445	425	318	38	23000	18824	0.0193	0.449894	4.09854	12575306	668	557	38	22363	0.175558	4844	0.00496	0.596185	5.43125	3420163	706	638	45	16877	0.0451765	88400	0.0905	0.0945483	0.861337	32958139	373	292	38	23000	0.824442	Ubiquitous
Overall	976813	1	263946767	270	218	38	23000	41841	0.0428342	1	1	18938222	452.624	306	38	22363	0.0428342	8125	0.00831787	1	1	4165709	512.703	358	38	16877	0.00831787	934972	0.957166	1	1	245008545	262.049	216	38	23000	0.957166	Overall
As for embryonic stage classes of peaks:
8-cell stage specific	54498	0.0558	10815256	198	174	38	2760
Morula stage specific	76175	0.078	16175994	212	179	38	7443
ICM stage specific	14108	0.0144	2984217	212	188	38	1711
8-cell & Morula stage specific	38195	0.0391	11539016	302	264	76	2518
Morula & ICM stage specific	20396	0.0209	6369284	312	278	66	5067
8-cell & ICM stage specific	413	0.000423	111499	270	244	98	1180
8-cell & Morula & ICM stage specific	9520	0.00975	3862373	406	363	66	2950
	213305	0.218373	51857639	243	206	38	7443
