# Supplementary material for: An organism-wide ATAC-seq peak catalog for the bovine and its use to identify regulatory variants
Source: HighWire-hosted journal article supplement (doi:10.1101/gr.277947.123), 2023-09-26
Supplement: Supplemental_Table_S8.xlsx [file Supplemental_Table_S8.xlsx]

## Sheet: STable_S8_de_novo_TFBM
Suppl. Table S8: HOMER de novo transcription factor binding motif enrichment analysis. Peaks were firstly allocated in their first NMF component group when their largest NMF component explained more than 90% of their total weight. Peaks which largest NMF components explained less than or equal to 30%, these were categoryzed in "Ubiquitous" group. HOMER software (Heinz et al., 2010) was run to sea…
NMF component group		P-value	% of peaks with motif	% of background sequences with motif	Top 3 de novo motifs identified with HOMER	Known motifs closely matched with the de novo motif (score)
NMF01	Central nervous system	1e-2665	0.3992	0.1027		SOX15/MA1152.1/Jaspar (0.94)	Sox10(HMG)/SciaticNerve-Sox3-ChIP-Seq(GSE35132)/Homer (0.93)	Sox15(HMG)/CPA-Sox15-ChIP-Seq(GSE62909)/Homer (0.93)
		1e-1658	0.3521	0.1171		pho/dmmpmm(Bergman)/fly (0.69)	ZNF528(Zf)/HEK293-ZNF528.GFP-ChIP-Seq(GSE58341)/Homer (0.66)	JUN/MA0488.1/Jaspar (0.63)
		1e-1325	0.2403	0.0674		PB0178.1_Sox8_2/Jaspar (0.83)	PB0170.1_Sox17_2/Jaspar (0.81)	Tb_0251(RRM)/Trypanosoma_brucei-RNCMPT00251-PBM/HughesRNA (0.81)
NMF02	Ruminal epithelium	1e-5503	0.3597	0.0391		Fra1(bZIP)/BT549-Fra1-ChIP-Seq(GSE46166)/Homer (0.99)	JunB(bZIP)/DendriticCells-Junb-ChIP-Seq(GSE36099)/Homer (0.98)	BATF(bZIP)/Th17-BATF-ChIP-Seq(GSE39756)/Homer (0.98)
		1e-2165	0.2456	0.0514		TEAD4/MA0809.1/Jaspar (0.95)	TEAD1/MA0090.2/Jaspar (0.92)	TEAD(TEA)/Fibroblast-PU.1-ChIP-Seq(Unpublished)/Homer (0.91)
		1e-1359	0.288	0.1025		Smp_067420(RRM)/Schistosoma_mansoni-RNCMPT00232-PBM/HughesRNA (0.89)	HNRNPCL1(RRM)/Homo_sapiens-RNCMPT00167-PBM/HughesRNA (0.88)	HNRNPC(RRM)/Homo_sapiens-RNCMPT00025-PBM/HughesRNA (0.88)
NMF03	Immune system	1e-2778	0.4118	0.0866		PB0058.1_Sfpi1_1/Jaspar (0.94)	ELF3(ETS)/PDAC-ELF3-ChIP-Seq(GSE64557)/Homer (0.94)	PU.1(ETS)/ThioMac-PU.1-ChIP-Seq(GSE21512)/Homer (0.93)
		1e-1192	0.2106	0.0478		RUNX1(Runt)/Jurkat-RUNX1-ChIP-Seq(GSE29180)/Homer (0.98)	RUNX2(Runt)/PCa-RUNX2-ChIP-Seq(GSE33889)/Homer (0.97)	RUNX(Runt)/HPC7-Runx1-ChIP-Seq(GSE22178)/Homer (0.97)
		1e-987	0.3894	0.1695		IRF3(IRF)/BMDM-Irf3-ChIP-Seq(GSE67343)/Homer (0.93)	IRF1(IRF)/PBMC-IRF1-ChIP-Seq(GSE43036)/Homer (0.91)	IRF8(IRF)/BMDM-IRF8-ChIP-Seq(GSE77884)/Homer (0.91)
NMF04	Mammary Gland	1e-3164	0.4546	0.1044		EHF(ETS)/LoVo-EHF-ChIP-Seq(GSE49402)/Homer (0.93)	ELF3(ETS)/PDAC-ELF3-ChIP-Seq(GSE64557)/Homer (0.91)	Elf4(ETS)/BMDM-Elf4-ChIP-Seq(GSE88699)/Homer (0.88)
		1e-1209	0.3228	0.1149		NF1-halfsite(CTF)/LNCaP-NF1-ChIP-Seq(Unpublished)/Homer (0.96)	NFIX/MA0671.1/Jaspar (0.93)	HIC1(Zf)/Treg-ZBTB29-ChIP-Seq(GSE99889)/Homer (0.89)
		1e-480	0.2256	0.1051		ETV6/MA0645.1/Jaspar (0.81)	Elk1(ETS)/Hela-Elk1-ChIP-Seq(GSE31477)/Homer (0.80)	ELK3/MA0759.1/Jaspar (0.79)
NMF05	Digestive tract	1e-1282	0.4569	0.0736		CDX4(Homeobox)/ZebrafishEmbryos-Cdx4.Myc-ChIP-Seq(GSE48254)/Homer (0.97)	CDX1/MA0878.1/Jaspar (0.96)	Hoxa13(Homeobox)/ChickenMSG-Hoxa13.Flag-ChIP-Seq(GSE86088)/Homer (0.94)
		1e-656	0.2034	0.0233		HNF4G/MA0484.1/Jaspar (0.96)	HNF4a(NR),DR1/HepG2-HNF4a-ChIP-Seq(GSE25021)/Homer (0.95)	dHNF4(NR)/Fly-HNF4-ChIP-Seq(GSE73675)/Homer (0.92)
		1e-418	0.2263	0.0516		KLF5(Zf)/LoVo-KLF5-ChIP-Seq(GSE49402)/Homer (0.93)	Klf1/MA0493.1/Jaspar (0.92)	EKLF(Zf)/Erythrocyte-Klf1-ChIP-Seq(GSE20478)/Homer (0.90)
NMF06	Lower respiratory	1e-602	0.3915	0.0792		Nkx3.1(Homeobox)/LNCaP-Nkx3.1-ChIP-Seq(GSE28264)/Homer (0.86)	Bapx1(Homeobox)/VertebralCol-Bapx1-ChIP-Seq(GSE36672)/Homer (0.84)	vnd/dmmpmm(Bergman)/fly (0.84)
		1e-472	0.4843	0.1569		CEBPD/MA0836.1/Jaspar (0.91)	CEBPE/MA0837.1/Jaspar (0.90)	CEBPB/MA0466.2/Jaspar (0.90)
		1e-380	0.5896	0.2632		HuR(?)/HEK293-HuR-CLIP-Seq(GSE87887)/Homer (0.74)	SeqBias: polyA-repeat (0.72)	VRN1(ABI3VP1)/col-VRN1-DAP-Seq(GSE60143)/Homer (0.72)
NMF07	Cerebellum	1e-3936	0.2782	0.0107		NEUROD2/MA0668.1/Jaspar (0.94)	Neurog1/MA0623.1/Jaspar (0.94)	OLIG3/MA0827.1/Jaspar (0.92)
		1e-2295	0.5477	0.1595		NFIX/MA0671.1/Jaspar (0.97)	NFIA/MA0670.1/Jaspar (0.97)	NF1-halfsite(CTF)/LNCaP-NF1-ChIP-Seq(Unpublished)/Homer (0.95)
		1e-1579	0.72	0.3573		unc-62/MA0918.1/Jaspar (0.90)	Meis1(Homeobox)/MastCells-Meis1-ChIP-Seq(GSE48085)/Homer (0.84)	Vis/dmmpmm(Noyes_hd)/fly (0.83)
NMF08	Testis	1e-3899	0.3908	0.0275		Nr5a2(NR)/Pancreas-LRH1-ChIP-Seq(GSE34295)/Homer (0.96)	Nr5a2(NR)/mES-Nr5a2-ChIP-Seq(GSE19019)/Homer (0.96)	PB0014.1_Esrra_1/Jaspar (0.94)
		1e-1307	0.2654	0.0505		GATA3/MA0037.3/Jaspar (0.96)	DAL80/Literature(Harbison)/Yeast (0.96)	DAL80(MacIsaac)/Yeast (0.96)
		1e-1124	0.3713	0.1165		SFP1/SacCer-Promoters/Homer (0.85)	SFP1/MA0378.1/Jaspar (0.83)	SFP1/MA0378.1/Jaspar (0.83)
NMF09	Upper respiratory	1e-1391	0.508	0.1322		PHA-4(Forkhead)/cElegans-Embryos-PHA4-ChIP-Seq(modEncode)/Homer (0.88)	FOXD2/MA0847.1/Jaspar (0.85)	FOXM1(Forkhead)/MCF7-FOXM1-ChIP-Seq(GSE72977)/Homer (0.85)
		1e-602	0.3981	0.153		ELF3(ETS)/PDAC-ELF3-ChIP-Seq(GSE64557)/Homer (0.91)	EHF(ETS)/LoVo-EHF-ChIP-Seq(GSE49402)/Homer (0.91)	ERG(ETS)/VCaP-ERG-ChIP-Seq(GSE14097)/Homer (0.87)
		1e-593	0.4435	0.1869		NF1-halfsite(CTF)/LNCaP-NF1-ChIP-Seq(Unpublished)/Homer (0.93)	HIC1(Zf)/Treg-ZBTB29-ChIP-Seq(GSE99889)/Homer (0.88)	Meis1(Homeobox)/MastCells-Meis1-ChIP-Seq(GSE48085)/Homer (0.85)
NMF10	Muscle	1e-889	0.1306	0.0107		MEF2A/MA0052.3/Jaspar (0.97)	MEF2D/MA0773.1/Jaspar (0.97)	Mef2c(MADS)/GM12878-Mef2c-ChIP-Seq(GSE32465)/Homer (0.96)
		1e-732	0.2438	0.0602		Six2(Homeobox)/NephronProgenitor-Six2-ChIP-Seq(GSE39837)/Homer (0.93)	Six1(Homeobox)/Myoblast-Six1-ChIP-Chip(GSE20150)/Homer (0.89)	Six4(Homeobox)/MCF7-SIX4-ChIP-Seq(Encode)/Homer (0.87)
		1e-391	0.2847	0.1224		Myf5(bHLH)/GM-Myf5-ChIP-Seq(GSE24852)/Homer (0.97)	Ptf1a(bHLH)/Panc1-Ptf1a-ChIP-Seq(GSE47459)/Homer (0.96)	MyoG(bHLH)/C2C12-MyoG-ChIP-Seq(GSE36024)/Homer (096)
NMF11	Endocrine	1e-1463	0.5288	0.1673		ceh-22/MA0264.1/Jaspar (0.97)	MA0264.1_ceh-22/Jaspar (0.97)	tin/dmmpmm(Noyes_hd)/fly (0.97)
		1e-1278	0.6842	0.3086		Pax6/MA0069.1/Jaspar (0.70)	PAX1/MA0779.1/Jaspar (0.70)	prd-PD/dmmpmm(Bergman)/fly (0.68)
		1e-1092	0.491	0.1781		NF1-halfsite(CTF)/LNCaP-NF1-ChIP-Seq(Unpublished)/Homer (0.71)	RIM101/Literature(Harbison)/Yeast (0.64)	RIM101(MacIsaac)/Yeast (0.64)
NMF12	Liver	1e-1351	0.4728	0.0802		HNF4G/MA0484.1/Jaspar (0.95)	HNF4a(NR),DR1/HepG2-HNF4a-ChIP-Seq(GSE25021)/Homer (0.94)	PPARa(NR),DR1/Liver-Ppara-ChIP-Seq(GSE47954)/Homer (0.92)
		1e-737	0.3091	0.0593		MF0005.1_Forkhead_class/Jaspar (0.92)	FOXM1(Forkhead)/MCF7-FOXM1-ChIP-Seq(GSE72977)/Homer (0.90)	FOXC1/MA0032.2/Jaspar (0.88)
		1e-691	0.2888	0.0546		NFIL3(bZIP)/HepG2-NFIL3-ChIP-Seq(Encode)/Homer (0.92)	CEBPE/MA0837.1/Jaspar (0.89)	HLF(bZIP)/HSC-HLF.Flag-ChIP-Seq(GSE69817)/Homer (0.92)
NMF13	8-cell stage embryo	1e-8462	0.6281	0.0858		Prop1(Homeobox)/GHFT1-PROP1.biotin-ChIP-Seq(GSE77302)/Homer (0.90)	Phox2a(Homeobox)/Neuron-Phox2a-ChIP-Seq(GSE31456)/Homer (0.88)	Pax7(Paired,Homeobox),long/Myoblast-Pax7-ChIP-Seq(GSE25064)/Homer (0.86)
		1e-3503	0.7447	0.32		GCR1/Literature(Harbison)/Yeast (0.69)	che-1/MA0260.1/Jaspar (0.69)	MA0260.1_che-1/Jaspar (0.69)
		1e-3004	0.852	0.4655		HNRNPR(RRM)/Gallus_gallus-RNCMPT00288-PBM/HughesRNA (0.69)	TCX2/MA1162.1/Jaspar (0.69)	Ng_0261(RRM)/Naegleria_gruberi-RNCMPT00261-PBM/HughesRNA (0.69)
NMF14	Morula embryo	1e-5743	0.9234	0.3628		FKH1/FKH1_YPD/53-FKH1,53-FKH2(Harbison)/Yeast (0.68)	FKH1(MacIsaac)/Yeast (0.67)	FOXO3/MA0157.2/Jaspar (0.67)
		1e-5570	0.573	0.1005		EBF1(EBF)/Near-E2A-ChIP-Seq(GSE21512)/Homer (0.82)	PB0102.1_Zic2_1/Jaspar (0.81)	TFAP2A(var.2)/MA0810.1/Jaspar (0.81)
		1e-4962	0.8796	0.3511		MSI(RRM)/Drosophila_melanogaster-RNCMPT00099-PBM/HughesRNA (0.74)	br-Z2/dmmpmm(Bigfoot)/fly (0.74)	MSI(RRM)/Drosophila_melanogaster-RNCMPT00040-PBM/HughesRNA (0.73)
NMF15	Inner cell mass (ICM) embryo	1e-1174	0.5294	0.0574		GATA3(Zf)/iTreg-Gata3-ChIP-Seq(GSE20898)/Homer (0.95)	GATA5/MA0766.1/Jaspar (0.95)	GATA3/MA0037.3/Jaspar (0.94)
		1e-1159	0.3558	0.0157		AP-1(bZIP)/ThioMac-PU.1-ChIP-Seq(GSE21512)/Homer (0.98)	BATF(bZIP)/Th17-BATF-ChIP-Seq(GSE39756)/Homer (0.98)	JunB(bZIP)/DendriticCells-Junb-ChIP-Seq(GSE36099)/Homer (0.98)
		1e-1095	0.8254	0.231		At3g24120(G2like)/col-At3g24120-DAP-Seq(GSE60143)/Homer (0.63)	YBX1(CSD)/Homo_sapiens-RNCMPT00116-PBM/HughesRNA (0.63)	ESRRB/MA0141.3/Jaspar (0.63)
NMF16	Undefined	1e-183	0.4236	0.113		FOS/MA0476.1/Jaspar (0.96)	BATF::JUN/MA0462.1/Jaspar (0.95)	JUND/MA0491.1/Jaspar (0.95)
		1e-179	0.5156	0.1733		PABPC1(RRM)/Homo_sapiens-RNCMPT00155-PBM/HughesRNA (0.73)	SART3(RRM)/Homo_sapiens-RNCMPT00064-PBM/HughesRNA (0.73)	Tv_0257(RRM)/Trichomonas_vaginalis-RNCMPT00257-PBM/HughesRNA (0.71)
		1e-177	0.4592	0.1378		cad/dmmpmm(Down)/fly (0.87)	Smp_067420(RRM)/Schistosoma_mansoni-RNCMPT00232-PBM/HughesRNA (0.83)	HNRNPC(RRM)/Homo_sapiens-RNCMPT00025-PBM/HughesRNA (0.80)
	Ubiquitous	1e-6450	0.1401	0.0237		CTCF(Zf)/CD4+-CTCF-ChIP-Seq(Barski_et_al.)/Homer (0.92)	BORIS(Zf)/K562-CTCFL-ChIP-Seq(GSE32465)/Homer (0.92)	CTCF/MA0139.1/Jaspar (0.92)
		1e-1051	0.0783	0.0335		AP-1(bZIP)/ThioMac-PU.1-ChIP-Seq(GSE21512)/Homer (0.98)	Jun-AP1(bZIP)/K562-cJun-ChIP-Seq(GSE31477)/Homer (0.98)	Atf3(bZIP)/GBM-ATF3-ChIP-Seq(GSE33912)/Homer (0.98)
		1e-691	0.235	0.1674		KLF5/MA0599.1/Jaspar (0.99)	KLF5(Zf)/LoVo-KLF5-ChIP-Seq(GSE49402)/Homer (0.96)	KLF3(Zf)/MEF-Klf3-ChIP-Seq(GSE44748)/Homer (0.95)
