# Supplementary material for: An organism-wide ATAC-seq peak catalog for the bovine and its use to identify regulatory variants
Source: HighWire-hosted journal article supplement (doi:10.1101/gr.277947.123), 2023-09-26
Supplement: Supplemental_Table_S9.xlsx [file Supplemental_Table_S9.xlsx]

## Sheet: STable_S9_Correl_RNAseq
Suppl. Table S9: RNA-seq information used for correlation analysis between chromatin openness and gene expression.
	Public RNA-seq Study_ID	Reference	Accession Number	Note
	Study 1	Fang et al., Genome Res., 2020	PRJNA573919, PRJNA625465	Holstein, 47 RNA-Seq, 6 individuals, Illumina TruSeq RNA sample prep kit, 150 bp paired-end reads.
	Study 2	Fang et al., Genome Res., 2020	PRJNA526257	Hereford, 96 RNA-Seq, 4 individuals (Dominette, Dominette's daughter, Dominette's male fetus, SuperBull 99375), 100 bp single-end reads.
	Study 3	Khansefid et al., BMC Genomics, 2018	PRJNA251439	Holstein, 18 tissues x 3 individuals, SureSelect Strand Specific RNA Library Prep Kit, mRNA, 100 bp paired-end reads.
	Study 6	Cai et al., Front. Genet., 2018	PRJNA416150, PRJNA300588, PRJNA300693	Holstein in China, 12 mammary gland, total RNA, 150 bp paired-end reads.
	Study 7	Fang et al., BMC Biol., 2019	PRJNA531208	Holstein, 6 Rumen epithelial primary cells, Illumina TruSeq RNA sample prep kit, 150 bp paired-end reads.
	Study 10	Dado-Senn et al., Sci Rep, 2018	PRJNA428884	Holstein, 60 mammary gland, NEBNext Ultra RNA Library Prep Kit, 150 bp single-end reads.
	Study 16	Graf et al., Proc. Natl. Acad. Sci. U.S.A., 2014	PRJNA228235	Six stages of embryos.
	ATAC-seq biosample name	Public RNA-seq
		RNA-seq biosample name	SRA file accession number	Study_ID
1	BBB1_f_PBMCcorce	Lymphocyte	SRR10174904, SRR10174905	Study 1
2	BBB1_f_WBCbuen	WhiteBloodCells	SRR1640124	Study 2
3	BBB1_f_WBCcorc	WhiteBloodCells	SRR1640124	Study 2
4	BOV1_f_Ovary	Ovary	SRR10174910	Study 1
5	BOV1_f_Skin	blackskin	SRR1449246, SRR1449247, SRR1449248	Study 3
6	BOV1_f_Uterus	Uterus	SRR10174920	Study 1
7	BOV2_m_Heart	Heart	SRR10174870	Study 1
8	BOV2_m_Skin	blackskin	SRR1449246, SRR1449247, SRR1449248	Study 3
9	BOV2_m_Testicle	SuperbullTestis	SRR1640128	Study 2
10	HOL1_m_Abomasum	Abomasum	SRR1640176	Study 2
11	HOL1_m_AdiposeCardiac	Adipose	SRR10174860	Study 1
12	HOL1_m_AdrenalGland	Adrenal	SRR1638904	Study 2
13	HOL1_m_Atrioventricular	Heart	SRR10174871	Study 1
14	HOL1_m_Bladder	Bladder	SRR1639235	Study 2
15	HOL1_m_BoneMarrow	BoneMarrow	SRR1640064	Study 2
16	HOL1_m_CartilageEpiglottis	LarynxCartilage	SRR1638909	Study 2
17	HOL1_m_Cecum	Caecum	SRR1640006	Study 2
18	HOL1_m_Cerebellum	Cerebellum	SRR1639216	Study 2
19	HOL1_m_CerebralFrontal	Frontalcortex	SRR10174867	Study 1
20	HOL1_m_ColonDescend	DescendingColon	SRR1639781	Study 2
21	HOL1_m_ColonSpiral	DescendingColon	SRR1639781	Study 2
22	HOL1_m_Duodenum	Duodenum	SRR1640091	Study 2
23	HOL1_m_Epididymis	Corposepididymis	SRR1640067	Study 2
24	HOL1_m_Esophagus	Esophagus	SRR1638791	Study 2
25	HOL1_m_Hippocampus	Hippocampus	SRR1640117	Study 2
26	HOL1_m_Hypothalamus	HypothalamusMedianEminence	SRR1638907	Study 2
27	HOL1_m_Ileum	Ileum	SRR10174875	Study 1
28	HOL1_m_Jejunum	Jejunum	SRR1640178	Study 2
29	HOL1_m_KidneyCortex	Kidney	SRR10174882	Study 1
30	HOL1_m_KidneyMedulla	Kidney	SRR10174882	Study 1
31	HOL1_m_Liver	Liver	SRR10174893	Study 1
32	HOL1_m_Lung	Lung	SRR10174901	Study 1
33	HOL1_m_LymphMandibula	LymphNodes	SRR1639242	Study 2
34	HOL1_m_LymphMediastinal	LymphNodes	SRR1639242	Study 2
35	HOL1_m_LymphMesenteric	Mesentericlymphnode	SRR1640186	Study 2
36	HOL1_m_LymphPrescapular	LymphNodes	SRR1639242	Study 2
37	HOL1_m_Mesencephalon	Midbrain	SRR1639777	Study 2
38	HOL1_m_MuscleBiceps	Muscle	SRR10174892, SRR10174891	Study 1
39	HOL1_m_MuscleDP	Muscle	SRR10174888, SRR10174887	Study 1
40	HOL1_m_MuscleLD	Muscle	SRR10174892, SRR10174891	Study 1
41	HOL1_m_MusclePsoas	Muscle	SRR10174892, SRR10174891	Study 1
42	HOL1_m_MuscleSM	Muscle	SRR10174892, SRR10174891	Study 1
43	HOL1_m_MuscleSS	Muscle	SRR10174892, SRR10174891	Study 1
44	HOL1_m_Omasum	Omasum	SRR1640145	Study 2
45	HOL1_m_PBMCcorce	Lymphocyte	SRR10174904, SRR10174905	Study 1
46	HOL1_m_PinealGland	PinealGrand	SRR1639998	Study 2
47	HOL1_m_PituitaryAnterior	AnteriorPituitary	SRR1639250	Study 2
48	HOL1_m_Pons	Pons	SRR1639683	Study 2
49	HOL1_m_Prostate	Prostrate	SRR1640165	Study 2
50	HOL1_m_PulmonaryVein	Heart	SRR10174871	Study 1
51	HOL1_m_Pylorus	Abomasum	SRR1640176	Study 2
52	HOL1_m_Reticulum	Reticulum	SRR1640010	Study 2
53	HOL1_m_RumenDorsal	Rumen	SRR1639784	Study 2
54	HOL1_m_SalivaryGland	SalivaryGland	SRR1638782	Study 2
55	HOL1_m_Spleen	Spleen	SRR10174916	Study 1
56	HOL1_m_Testicle	SuperbullTestis	SRR1640128	Study 2
57	HOL1_m_Thalamus	Thalamus	SRR1640174	Study 2
58	HOL1_m_ThyroidGland	Thyroid	SRR1640068	Study 2
59	HOL1_m_Tongue	InternalTongueMuscle	SRR1638787	Study 2
60	HOL1_m_WBCcorc	WhiteBloodCells	SRR1640124	Study 2
61	HOL11_m_REPC	RumenEPC	SRR8861614, SRR8861615, SRR8861616	Study 7
62	HOL11_m_REPCButyrate	RumenEPC	SRR8861611, SRR8861612, SRR8861613	Study 7
63	HOL12_m_REPC	RumenEPC	SRR8861614, SRR8861615, SRR8861616	Study 7
64	HOL12_m_REPCButyrate	RumenEPC	SRR8861611, SRR8861612, SRR8861613	Study 7
65	HOL2_m_AdiposeCardiac	Adipose	SRR10174860	Study 1
66	HOL2_m_Atrioventricular	Heart	SRR10174871	Study 1
67	HOL2_m_Epididymis	Corposepididymis	SRR1640067	Study 2
68	HOL2_m_Esophagus	Esophagus	SRR1638791	Study 2
69	HOL2_m_Prostate	Prostrate	SRR1640165	Study 2
70	HOL2_m_PulmonaryVein	Aorta	SRR1638784	Study 2
71	HOL2_m_Reticulum	Reticulum	SRR1640010	Study 2
72	HOL2_m_RumenDorsal	Rumen	SRR1639784	Study 2
73	HOL2_m_Thymus	thymus	SRR1449291, SRR1449292, SRR1449293	Study 3
74	HOL2_m_Tongue	InternalTongueMuscle	SRR1638787	Study 2
75	HOL2_m_WBCcorc	WhiteBloodCells	SRR1640124	Study 2
76	HOL4_f_MammaryGland	mammaryHighmilkprotein	SRR6232809	Study 6
77	HOL5_f_MammaryGland	MammaryDay.3HT	SRR6448614	Study 10
78	HOL6_f_MammaryGland	MammaryDay.3HT	SRR6448614	Study 10
79	HOL7_f_MammaryGland	MammaryDay.3HT	SRR6448614	Study 10
80	HOL8_f_MammaryGland	MammaryDay.3HT	SRR6448614	Study 10
81	HOLE1_na_EmbryoICM	Blastocyst	SRR1030312, SRR1030313, SRR1030314	Study 16
82	HOLE14_na_Embryo8cell	X8.cell	SRR1030306, SRR1030307, SRR1030308	Study 16
83	HOLE19_na_EmbryoMorula	X16.cell	SRR1030309, SRR1030310, SRR1030311	Study 16
84	HOLS11_na_LymphBronchialBRSV	LymphNodes	SRR1639242	Study 2
85	HOLS2_na_LymphBronchial	LymphNodes	SRR1639242	Study 2
86	HRD1_m_Lung	Lung	SRR10174901	Study 1
87	HRD1_m_Muscle	Muscle	SRR10174892, SRR10174891	Study 1
88	HRD2_m_Cerebellum	braincerebellum	SRR1449259, SRR1449260, SRR1449261	Study 3
89	HRD2_m_Liver	Liver	SRR10174898	Study 1
90	HRD2_m_Lung	Lung	SRR10174901	Study 1
91	HRD2_m_Muscle	Muscle	SRR10174892, SRR10174891	Study 1
