# Supplementary material for: An organism-wide ATAC-seq peak catalog for the bovine and its use to identify regulatory variants
Source: HighWire-hosted journal article supplement (doi:10.1101/gr.277947.123), 2023-09-26
Supplement: Supplemental_Table_S10.xlsx [file Supplemental_Table_S10.xlsx]

## Sheet: STable_S10_SNVs_in_TFBM
Suppl. Table S10: Checking for an over-representation of genetic variants in TF binding motifs (top ten de novo motifs. See Suppl. Table S8) enriched in peaks assigned to specific NMF components (or the group of ubiquitous peaks) .
NMF_component_(1-16)_and_motif_(1-10)	Variant type	Number in motif	Number outside motif	Number in NMF	Motif space	Non motif space	NMF space	Motif/NMF ratio	Expected number in motif	Statistic	p-value
NMF16_Undefined_motif10	snp	9	181	190	29047	711721	740768	0.039212	7.45028	1.21835	0.562432
NMF16_Undefined_motif1	snp	10	180	190	26993	713775	740768	0.0364392	6.92345	1.46905	0.233598
NMF16_Undefined_motif2	snp	10	180	190	65107	675661	740768	0.0878912	16.6993	0.576539	0.0860599
NMF16_Undefined_motif3	snp	9	181	190	36681	704087	740768	0.0495175	9.40833	0.954441	0.891389
NMF16_Undefined_motif4	snp	10	180	190	46437	694331	740768	0.0626876	11.9107	0.830673	0.567433
NMF16_Undefined_motif5	snp	8	182	190	34760	706008	740768	0.0469243	8.91561	0.892788	0.753443
NMF16_Undefined_motif6	snp	11	179	190	70031	670737	740768	0.0945384	17.9623	0.588575	0.0842792
NMF16_Undefined_motif7	snp	9	181	190	55156	685612	740768	0.0744579	14.147	0.618087	0.154909
NMF16_Undefined_motif8	snp	16	174	190	40966	699802	740768	0.0553021	10.5074	1.57081	0.0812725
NMF16_Undefined_motif9	snp	21	169	190	83031	657737	740768	0.112088	21.2967	0.984339	0.945608
NMF16_Undefined_motif	snp	86	104	190	358864	381904	740768	0.484449	92.0452	0.880014	0.380183
Ubiquitous_motif10	snp	16	11310	11326	113016	45481018	45594034	0.00247875	28.0743	0.569308	0.0225111
Ubiquitous_motif1	snp	25	11301	11326	186505	45407529	45594034	0.00409056	46.3296	0.538593	0.00168887
Ubiquitous_motif2	snp	8	11318	11326	83520	45510514	45594034	0.00183182	20.7472	0.38516	0.00509246
Ubiquitous_motif3	snp	307	11019	11326	464743	45129291	45594034	0.0101931	115.447	2.70546	8.32019e-72
Ubiquitous_motif4	snp	50	11276	11326	317976	45276058	45594034	0.00697407	78.9883	0.631378	0.00106369
Ubiquitous_motif5	snp	13	11313	11326	64232	45529802	45594034	0.00140878	15.9559	0.814535	0.458993
Ubiquitous_motif6	snp	28	11298	11326	133814	45460220	45594034	0.0029349	33.2407	0.84195	0.362656
Ubiquitous_motif7	snp	13	11313	11326	95305	45498729	45594034	0.0020903	23.6747	0.548592	0.0280793
Ubiquitous_motif8	snp	36	11290	11326	207675	45386359	45594034	0.00455487	51.5885	0.696867	0.0296078
Ubiquitous_motif9	snp	70	11256	11326	141715	45452319	45594034	0.00310819	35.2034	1.99459	4.25858e-09
Ubiquitous_motif	snp	564	10762	11326	1786469	43807565	45594034	0.0391821	443.776	1.28511	5.80747e-09
NMF13_8-cell stage embryo_motif10	snp	993	467	1460	6454619	2790970	9245589	0.69813	1019.27	0.919426	0.134241
NMF13_8-cell stage embryo_motif1	snp	117	1343	1460	882052	8363537	9245589	0.0954025	139.288	0.826049	0.047084
NMF13_8-cell stage embryo_motif2	snp	227	1233	1460	1781733	7463856	9245589	0.192712	281.359	0.771229	0.000309946
NMF13_8-cell stage embryo_motif3	snp	373	1087	1460	2563575	6682014	9245589	0.277275	404.822	0.894418	0.0628259
NMF13_8-cell stage embryo_motif4	snp	506	954	1460	2988693	6256896	9245589	0.323256	471.954	1.1104	0.0567741
NMF13_8-cell stage embryo_motif5	snp	135	1325	1460	730731	8514858	9245589	0.0790356	115.392	1.18724	0.0571638
NMF13_8-cell stage embryo_motif6	snp	755	705	1460	4535267	4710322	9245589	0.490533	716.178	1.11226	0.0421145
NMF13_8-cell stage embryo_motif7	snp	924	536	1460	5821320	3424269	9245589	0.629632	919.263	1.01404	0.797389
NMF13_8-cell stage embryo_motif8	snp	1015	445	1460	6276132	2969457	9245589	0.678824	991.084	1.07917	0.180082
NMF13_8-cell stage embryo_motif9	snp	980	480	1460	6336647	2908942	9245589	0.68537	1000.64	0.937261	0.244735
NMF13_8-cell stage embryo_motif	snp	1431	29	1460	9102338	143251	9245589	0.984506	1437.38	0.77658	0.176481
NMF09_Upper respiratory_motif10	snp	53	449	502	386929	2760644	3147573	0.122929	61.7105	0.842187	0.236418
NMF09_Upper respiratory_motif1	snp	14	488	502	109517	3038056	3147573	0.0347941	17.4666	0.795834	0.398504
NMF09_Upper respiratory_motif2	snp	21	481	502	122874	3024699	3147573	0.0390377	19.5969	1.07472	0.746452
NMF09_Upper respiratory_motif3	snp	20	482	502	118201	3029372	3147573	0.0375531	18.8516	1.06344	0.78747
NMF09_Upper respiratory_motif4	snp	30	472	502	241594	2905979	3147573	0.0767556	38.5313	0.764514	0.152608
NMF09_Upper respiratory_motif5	snp	11	491	502	120345	3027228	3147573	0.0382342	19.1936	0.563545	0.0565147
NMF09_Upper respiratory_motif6	snp	40	462	502	244277	2903296	3147573	0.077608	38.9592	1.02903	0.862168
NMF09_Upper respiratory_motif7	snp	19	483	502	168819	2978754	3147573	0.0536347	26.9246	0.694096	0.116437
NMF09_Upper respiratory_motif8	snp	51	451	502	359852	2787721	3147573	0.114327	57.3921	0.87603	0.369955
NMF09_Upper respiratory_motif9	snp	31	471	502	301317	2846256	3147573	0.0957299	48.0564	0.621715	0.00967036
NMF09_Upper respiratory_motif	snp	219	283	502	1580986	1566587	3147573	0.502287	252.148	0.766804	0.00308652
NMF10_Muscle_motif10	snp	27	553	580	144563	3063539	3208102	0.0450618	26.1359	1.03468	0.862674
NMF10_Muscle_motif1	snp	2	578	580	23892	3184210	3208102	0.00744739	4.31949	0.46116	0.262624
NMF10_Muscle_motif2	snp	12	568	580	59483	3148619	3208102	0.0185415	10.7541	1.1183	0.701344
NMF10_Muscle_motif3	snp	11	569	580	75355	3132747	3208102	0.023489	13.6236	0.803699	0.471953
NMF10_Muscle_motif4	snp	17	563	580	123079	3085023	3208102	0.0383651	22.2517	0.756859	0.256244
NMF10_Muscle_motif5	snp	27	553	580	158116	3049986	3208102	0.0492865	28.5861	0.941804	0.760932
NMF10_Muscle_motif6	snp	12	568	580	66965	3141137	3208102	0.0208737	12.1068	0.990996	0.975265
NMF10_Muscle_motif7	snp	11	569	580	70746	3137356	3208102	0.0220523	12.7903	0.857319	0.612706
NMF10_Muscle_motif8	snp	11	569	580	100432	3107670	3208102	0.0313057	18.1573	0.598196	0.0878965
NMF10_Muscle_motif9	snp	16	564	580	81011	3127091	3208102	0.025252	14.6462	1.09506	0.720111
NMF10_Muscle_motif	snp	120	460	580	773890	2434212	3208102	0.24123	139.913	0.820545	0.0532761
NMF11_Endocrine_motif10	snp	55	776	831	368456	4347076	4715532	0.0781367	64.9316	0.836205	0.199254
NMF11_Endocrine_motif1	snp	33	798	831	188346	4527186	4715532	0.0399416	33.1915	0.993992	0.972939
NMF11_Endocrine_motif2	snp	80	751	831	430362	4285170	4715532	0.0912648	75.841	1.06068	0.61639
NMF11_Endocrine_motif3	snp	50	781	831	306957	4408575	4715532	0.0650949	54.0938	0.919474	0.564838
NMF11_Endocrine_motif4	snp	47	784	831	342834	4372698	4715532	0.0727031	60.4163	0.764623	0.0730612
NMF11_Endocrine_motif5	snp	49	782	831	382787	4332745	4715532	0.0811758	67.4571	0.709243	0.0190574
NMF11_Endocrine_motif6	snp	188	643	831	874056	3841476	4715532	0.185357	154.032	1.28501	0.00242611
NMF11_Endocrine_motif7	snp	103	728	831	682427	4033105	4715532	0.144719	120.261	0.83616	0.0887549
NMF11_Endocrine_motif8	snp	100	731	831	537106	4178426	4715532	0.113901	94.6521	1.06423	0.559254
NMF11_Endocrine_motif9	snp	56	775	831	228027	4487505	4715532	0.0483566	40.1843	1.42202	0.0105415
NMF11_Endocrine_motif	snp	501	330	831	2860771	1854761	4715532	0.60667	504.143	0.984303	0.823402
NMF12_Liver_motif10	snp	60	337	397	400591	1920532	2321123	0.172585	68.5162	0.853575	0.258026
NMF12_Liver_motif1	snp	13	384	397	130301	2190822	2321123	0.0561371	22.2864	0.569209	0.0428921
NMF12_Liver_motif2	snp	6	391	397	66741	2254382	2321123	0.0287538	11.4152	0.518334	0.103878
NMF12_Liver_motif3	snp	8	389	397	55094	2266029	2321123	0.0237359	9.42316	0.845866	0.638916
NMF12_Liver_motif4	snp	40	357	397	222990	2098133	2321123	0.0960699	38.1397	1.05424	0.751378
NMF12_Liver_motif5	snp	6	391	397	79802	2241321	2321123	0.0343808	13.6492	0.430988	0.0351203
NMF12_Liver_motif6	snp	47	350	397	282473	2038650	2321123	0.121697	48.3136	0.96916	0.840189
NMF12_Liver_motif7	snp	17	380	397	121298	2199825	2321123	0.0522583	20.7466	0.811334	0.398157
NMF12_Liver_motif8	snp	47	350	397	213912	2107211	2321123	0.0921588	36.5871	1.32283	0.0707969
NMF12_Liver_motif9	snp	55	342	397	405060	1916063	2321123	0.17451	69.2806	0.760724	0.0589774
NMF12_Liver_motif	snp	218	179	397	1361731	959392	2321123	0.586669	232.908	0.858041	0.128666
NMF15_ICM embryo_motif10	snp	228	114	342	1490805	577376	2068181	0.720829	246.524	0.774583	0.0255588
NMF15_ICM embryo_motif1	snp	10	332	342	104651	1963530	2068181	0.0506005	17.3054	0.56514	0.071498
NMF15_ICM embryo_motif2	snp	10	332	342	53613	2014568	2068181	0.0259228	8.86559	1.13181	0.699476
NMF15_ICM embryo_motif3	snp	68	274	342	522570	1545611	2068181	0.252671	86.4136	0.73403	0.0219431
NMF15_ICM embryo_motif4	snp	31	311	342	290946	1777235	2068181	0.140677	48.1116	0.608883	0.0077848
NMF15_ICM embryo_motif5	snp	73	269	342	464800	1603381	2068181	0.224739	76.8606	0.936141	0.616988
NMF15_ICM embryo_motif6	snp	85	257	342	406087	1662094	2068181	0.19635	67.1516	1.3537	0.0151151
NMF15_ICM embryo_motif7	snp	87	255	342	551081	1517100	2068181	0.266457	91.1282	0.939243	0.613612
NMF15_ICM embryo_motif8	snp	218	124	342	1334908	733273	2068181	0.64545	220.744	0.965715	0.756431
NMF15_ICM embryo_motif9	snp	240	102	342	1485229	582952	2068181	0.718133	245.601	0.923529	0.500799
NMF15_ICM embryo_motif	snp	333	9	342	2026663	41518	2068181	0.979925	335.134	0.757978	0.410554
NMF01_CNS_motif10	snp	15	1101	1116	83994	5897364	5981358	0.0140426	15.6716	0.956563	0.864343
NMF01_CNS_motif1	snp	33	1083	1116	255564	5725794	5981358	0.0427268	47.6831	0.682687	0.029759
NMF01_CNS_motif2	snp	40	1076	1116	271673	5709685	5981358	0.04542	50.6887	0.781292	0.12439
NMF01_CNS_motif3	snp	17	1099	1116	138086	5843272	5981358	0.0230861	25.764	0.654572	0.0806537
NMF01_CNS_motif4	snp	65	1051	1116	462236	5519122	5981358	0.0772794	86.2439	0.738443	0.0172465
NMF01_CNS_motif5	snp	70	1046	1116	419223	5562135	5981358	0.0700883	78.2185	0.887897	0.335224
NMF01_CNS_motif6	snp	33	1083	1116	147834	5833524	5981358	0.0247158	27.5828	1.20238	0.296277
NMF01_CNS_motif7	snp	32	1084	1116	235370	5745988	5981358	0.0393506	43.9153	0.720666	0.0665825
NMF01_CNS_motif8	snp	59	1057	1116	284341	5697017	5981358	0.0475379	53.0523	1.11837	0.402754
NMF01_CNS_motif9	snp	116	1000	1116	640228	5341130	5981358	0.107037	119.454	0.967735	0.738087
NMF01_CNS_motif	snp	381	735	1116	2229674	3751684	5981358	0.372771	416.012	0.872213	0.0302003
NMF02_Ruminal epithelium_motif10	snp	91	1007	1098	515880	6902498	7418378	0.0695408	76.3558	1.20912	0.0823195
NMF02_Ruminal epithelium_motif1	snp	34	1064	1098	285209	7133169	7418378	0.0384463	42.214	0.799202	0.197308
NMF02_Ruminal epithelium_motif2	snp	19	1079	1098	202206	7216172	7418378	0.0272574	29.9287	0.628413	0.0428197
NMF02_Ruminal epithelium_motif3	snp	48	1050	1098	255102	7163276	7418378	0.0343878	37.7578	1.28366	0.0898413
NMF02_Ruminal epithelium_motif4	snp	12	1086	1098	107878	7310500	7418378	0.014542	15.9671	0.7488	0.317264
NMF02_Ruminal epithelium_motif5	snp	15	1083	1098	102257	7316121	7418378	0.0137843	15.1351	0.990947	0.972097
NMF02_Ruminal epithelium_motif6	snp	9	1089	1098	56924	7361454	7418378	0.00767338	8.42537	1.06877	0.842472
NMF02_Ruminal epithelium_motif7	snp	64	1034	1098	559475	6858903	7418378	0.0754174	82.8083	0.758811	0.0315936
NMF02_Ruminal epithelium_motif8	snp	66	1032	1098	454338	6964040	7418378	0.0612449	67.2469	0.980272	0.875294
NMF02_Ruminal epithelium_motif9	snp	75	1023	1098	598171	6820207	7418378	0.0806337	88.5358	0.835907	0.133536
NMF02_Ruminal epithelium_motif	snp	344	754	1098	2418157	5000221	7418378	0.325968	357.913	0.943391	0.370369
NMF03_Immune system_motif10	snp	27	833	860	151963	4917113	5069076	0.0299784	25.7815	1.0488	0.807489
NMF03_Immune system_motif1	snp	14	846	860	177470	4891606	5069076	0.0350103	30.1089	0.456125	0.00280329
NMF03_Immune system_motif2	snp	7	853	860	79949	4989127	5069076	0.0157719	13.5638	0.512107	0.0724206
NMF03_Immune system_motif3	snp	30	830	860	255450	4813626	5069076	0.0503938	43.3387	0.681098	0.0375961
NMF03_Immune system_motif4	snp	30	830	860	189609	4879467	5069076	0.037405	32.1683	0.930158	0.696785
NMF03_Immune system_motif5	snp	28	832	860	160544	4908532	5069076	0.0316713	27.2373	1.02895	0.881936
NMF03_Immune system_motif6	snp	42	818	860	195310	4873766	5069076	0.0385297	33.1355	1.28126	0.1163
NMF03_Immune system_motif7	snp	74	786	860	491047	4578029	5069076	0.0968711	83.3092	0.877737	0.283172
NMF03_Immune system_motif8	snp	43	817	860	282488	4786588	5069076	0.0557277	47.9258	0.89181	0.46403
NMF03_Immune system_motif9	snp	24	836	860	185800	4883276	5069076	0.0366536	31.5221	0.75452	0.172245
NMF03_Immune system_motif	snp	260	600	860	1667691	3401385	5069076	0.328993	282.934	0.883817	0.0960194
NMF04_Mammary Gland_motif10	snp	35	1273	1308	125245	6619275	6744520	0.0185699	24.2894	1.45308	0.0282578
NMF04_Mammary Gland_motif1	snp	36	1272	1308	221895	6522625	6744520	0.0329	43.0333	0.831937	0.275611
NMF04_Mammary Gland_motif2	snp	24	1284	1308	161730	6582790	6744520	0.0239795	31.3651	0.760791	0.183139
NMF04_Mammary Gland_motif3	snp	29	1279	1308	93181	6651339	6744520	0.0138158	18.0711	1.61849	0.00962981
NMF04_Mammary Gland_motif4	snp	49	1259	1308	216771	6527749	6744520	0.0321403	42.0395	1.17201	0.275186
NMF04_Mammary Gland_motif5	snp	19	1289	1308	72191	6672329	6744520	0.0107037	14.0004	1.36237	0.179144
NMF04_Mammary Gland_motif6	snp	46	1262	1308	260451	6484069	6744520	0.0386167	50.5106	0.907445	0.517446
NMF04_Mammary Gland_motif7	snp	43	1265	1308	223924	6520596	6744520	0.0332009	43.4268	0.989839	0.947489
NMF04_Mammary Gland_motif8	snp	37	1271	1308	144428	6600092	6744520	0.0214141	28.0097	1.33032	0.085942
NMF04_Mammary Gland_motif9	snp	98	1210	1308	461747	6282773	6744520	0.0684625	89.549	1.10202	0.354816
NMF04_Mammary Gland_motif	snp	338	970	1308	1688599	5055921	6744520	0.250366	327.479	1.04332	0.5019
NMF14_Morula embryo_motif10	snp	1351	624	1975	7939710	2910582	10850292	0.731751	1445.21	0.793681	1.71261e-06
NMF14_Morula embryo_motif1	snp	741	1234	1975	4293071	6557221	10850292	0.395664	781.437	0.91718	0.0627792
NMF14_Morula embryo_motif2	snp	178	1797	1975	840877	10009415	10850292	0.0774981	153.059	1.17909	0.0358198
NMF14_Morula embryo_motif3	snp	535	1440	1975	3182677	7667615	10850292	0.293326	579.32	0.895074	0.0284938
NMF14_Morula embryo_motif4	snp	252	1723	1975	1722690	9127602	10850292	0.158769	313.569	0.774934	0.000150133
NMF14_Morula embryo_motif5	snp	741	1234	1975	3693152	7157140	10850292	0.340374	672.238	1.16371	0.00109299
NMF14_Morula embryo_motif6	snp	1129	846	1975	6888772	3961520	10850292	0.634893	1253.91	0.767439	5.28295e-09
NMF14_Morula embryo_motif7	snp	1090	885	1975	6682311	4167981	10850292	0.615865	1216.33	0.768214	5.08098e-09
NMF14_Morula embryo_motif8	snp	1453	522	1975	7311743	3538549	10850292	0.673875	1330.9	1.3471	4.6136e-09
NMF14_Morula embryo_motif9	snp	1511	464	1975	7985778	2864514	10850292	0.735997	1453.59	1.1681	0.00338455
NMF14_Morula embryo_motif	snp	1954	21	1975	10743702	106590	10850292	0.990176	1955.6	0.92314	0.715388
NMF05_Digestive tract_motif10	snp	13	252	265	130395	1752824	1883219	0.0692405	18.3487	0.693458	0.195568
NMF05_Digestive tract_motif1	snp	5	260	265	67572	1815647	1883219	0.0358811	9.5085	0.516727	0.136473
NMF05_Digestive tract_motif2	snp	1	264	265	29420	1853799	1883219	0.0156222	4.13988	0.23868	0.119854
NMF05_Digestive tract_motif3	snp	3	262	265	36648	1846571	1883219	0.0194603	5.15698	0.576947	0.337451
NMF05_Digestive tract_motif4	snp	4	261	265	35573	1847646	1883219	0.0188895	5.00571	0.796009	0.649961
NMF05_Digestive tract_motif5	snp	8	257	265	76128	1807091	1883219	0.0404244	10.7125	0.738912	0.397542
NMF05_Digestive tract_motif6	snp	18	247	265	111204	1772015	1883219	0.05905	15.6482	1.16124	0.539954
NMF05_Digestive tract_motif7	snp	11	254	265	76691	1806528	1883219	0.0407234	10.7917	1.02014	0.948378
NMF05_Digestive tract_motif8	snp	10	255	265	48891	1834328	1883219	0.0259614	6.87977	1.47132	0.22807
NMF05_Digestive tract_motif9	snp	11	254	265	54688	1828531	1883219	0.0290396	7.6955	1.448	0.226706
NMF05_Digestive tract_motif	snp	67	198	265	555564	1327655	1883219	0.295008	78.177	0.80865	0.132183
NMF06_Lower respiratory_motif10	snp	67	274	341	298456	1342029	1640485	0.181932	62.0387	1.09953	0.486164
NMF06_Lower respiratory_motif1	snp	12	329	341	78693	1561792	1640485	0.0479694	16.3575	0.72389	0.269495
NMF06_Lower respiratory_motif2	snp	23	318	341	126568	1513917	1640485	0.0771528	26.3091	0.865125	0.501856
NMF06_Lower respiratory_motif3	snp	40	301	341	261878	1378607	1640485	0.159634	54.4354	0.699576	0.0328192
NMF06_Lower respiratory_motif4	snp	59	282	341	327136	1313349	1640485	0.199414	68.0002	0.839952	0.222534
NMF06_Lower respiratory_motif5	snp	16	325	341	132580	1507905	1640485	0.0808176	27.5588	0.559929	0.0216428
NMF06_Lower respiratory_motif6	snp	79	262	341	299058	1341427	1640485	0.182299	62.1638	1.3525	0.0182038
NMF06_Lower respiratory_motif7	snp	26	315	341	198425	1442060	1640485	0.120955	41.2457	0.59986	0.0113436
NMF06_Lower respiratory_motif8	snp	41	300	341	238559	1401926	1640485	0.14542	49.5882	0.803141	0.187078
NMF06_Lower respiratory_motif9	snp	88	253	341	379136	1261349	1640485	0.231112	78.8092	1.15718	0.237731
NMF06_Lower respiratory_motif	snp	248	93	341	1307225	333260	1640485	0.796853	271.727	0.679832	0.00140558
NMF07_Cerebellum_motif10	snp	69	1337	1406	423811	7349154	7772965	0.0545237	76.6604	0.894917	0.368235
NMF07_Cerebellum_motif1	snp	13	1393	1406	72490	7700475	7772965	0.00932591	13.1122	0.991361	0.975158
NMF07_Cerebellum_motif2	snp	37	1369	1406	223223	7549742	7772965	0.0287179	40.3773	0.914095	0.589679
NMF07_Cerebellum_motif3	snp	119	1287	1406	686866	7086099	7772965	0.088366	124.243	0.953902	0.622288
NMF07_Cerebellum_motif4	snp	122	1284	1406	650274	7122691	7772965	0.0836584	117.624	1.04074	0.673369
NMF07_Cerebellum_motif5	snp	61	1345	1406	253226	7519739	7772965	0.0325778	45.8044	1.3468	0.0224454
NMF07_Cerebellum_motif6	snp	110	1296	1406	707423	7065542	7772965	0.0910107	127.961	0.847723	0.095837
NMF07_Cerebellum_motif7	snp	90	1316	1406	513233	7259732	7772965	0.066028	92.8353	0.96737	0.760753
NMF07_Cerebellum_motif8	snp	44	1362	1406	281508	7491457	7772965	0.0362163	50.9201	0.859708	0.32324
NMF07_Cerebellum_motif9	snp	120	1286	1406	746350	7026615	7772965	0.0960187	135.002	0.878504	0.174456
NMF07_Cerebellum_motif	snp	580	826	1406	3377642	4395323	7772965	0.434537	610.959	0.913745	0.0957846
NMF08_Testis_motif10	snp	93	950	1043	601868	5384071	5985939	0.100547	104.87	0.875727	0.221621
NMF08_Testis_motif1	snp	14	1029	1043	128013	5857926	5985939	0.0213856	22.3052	0.62259	0.0754648
NMF08_Testis_motif2	snp	7	1036	1043	80270	5905669	5985939	0.0134098	13.9864	0.497112	0.0600059
NMF08_Testis_motif3	snp	27	1016	1043	227079	5758860	5985939	0.0379354	39.5666	0.673953	0.0416684
NMF08_Testis_motif4	snp	32	1011	1043	237382	5748557	5985939	0.0396566	41.3618	0.766496	0.137434
NMF08_Testis_motif5	snp	31	1012	1043	177006	5808933	5985939	0.0295703	30.8418	1.00529	0.976934
NMF08_Testis_motif6	snp	55	988	1043	432891	5553048	5985939	0.072318	75.4277	0.714099	0.0146044
NMF08_Testis_motif7	snp	116	927	1043	563304	5422635	5985939	0.0941045	98.151	1.20461	0.0583717
NMF08_Testis_motif8	snp	8	1035	1043	95493	5890446	5985939	0.0159529	16.6389	0.476789	0.0327655
NMF08_Testis_motif9	snp	115	928	1043	811261	5174678	5985939	0.135528	141.355	0.790447	0.0171173
NMF08_Testis_motif	snp	370	673	1043	2558719	3427220	5985939	0.427455	445.835	0.736387	2.06891e-06
All together	snp	8014	17026	25040	46398685	77988449	124387134	0.373018	8184.08	3.53462	0.0600999
NMF16_Undefined_motif10	Indel	0	19	19	29047	711721	740768	0.039212	0.745028	0	0.378541
NMF16_Undefined_motif1	Indel	1	18	19	26993	713775	740768	0.0364392	0.692345	1.46905	0.706417
NMF16_Undefined_motif2	Indel	1	18	19	65107	675661	740768	0.0878912	1.66993	0.576539	0.587251
NMF16_Undefined_motif3	Indel	1	18	19	36681	704087	740768	0.0495175	0.940833	1.06638	0.950111
NMF16_Undefined_motif4	Indel	2	17	19	46437	694331	740768	0.0626876	1.19107	1.75907	0.443913
NMF16_Undefined_motif5	Indel	0	19	19	34760	706008	740768	0.0469243	0.891561	0	0.333449
NMF16_Undefined_motif6	Indel	2	17	19	70031	670737	740768	0.0945384	1.79623	1.12679	0.873053
NMF16_Undefined_motif7	Indel	1	18	19	55156	685612	740768	0.0744579	1.4147	0.690579	0.717044
NMF16_Undefined_motif8	Indel	2	17	19	40966	699802	740768	0.0553021	1.05074	2.00971	0.340703
NMF16_Undefined_motif9	Indel	1	18	19	83031	657737	740768	0.112088	2.12967	0.440088	0.411359
NMF16_Undefined_motif	Indel	10	9	19	358864	381904	740768	0.484449	9.20452	1.18245	0.714987
Ubiquitous_motif10	Indel	2	1844	1846	113016	45481018	45594034	0.00247875	4.57576	0.436475	0.227961
Ubiquitous_motif1	Indel	3	1843	1846	186505	45407529	45594034	0.00409056	7.55117	0.396308	0.096993
Ubiquitous_motif2	Indel	0	1846	1846	83520	45510514	45594034	0.00183182	3.38154	0	0.0656828
Ubiquitous_motif3	Indel	84	1762	1846	464743	45129291	45594034	0.0101931	18.8164	4.62934	1.52172e-51
Ubiquitous_motif4	Indel	7	1839	1846	317976	45276058	45594034	0.00697407	12.8741	0.541989	0.100409
Ubiquitous_motif5	Indel	1	1845	1846	64232	45529802	45594034	0.00140878	2.60061	0.384192	0.320593
Ubiquitous_motif6	Indel	3	1843	1846	133814	45460220	45594034	0.0029349	5.41783	0.553001	0.298209
Ubiquitous_motif7	Indel	4	1842	1846	95305	45498729	45594034	0.0020903	3.85869	1.0367	0.94259
Ubiquitous_motif8	Indel	2	1844	1846	207675	45386359	45594034	0.00455487	8.40829	0.237034	0.0267579
Ubiquitous_motif9	Indel	10	1836	1846	141715	45452319	45594034	0.00310819	5.73772	1.7469	0.0747223
Ubiquitous_motif	Indel	115	1731	1846	1786469	43807565	45594034	0.0391821	72.3301	1.62912	3.08002e-07
NMF13_8-cell stage embryo_motif10	Indel	124	71	195	6454619	2790970	9245589	0.69813	136.135	0.755176	0.0583561
NMF13_8-cell stage embryo_motif1	Indel	32	163	195	882052	8363537	9245589	0.0954025	18.6035	1.86148	0.0010922
NMF13_8-cell stage embryo_motif2	Indel	39	156	195	1781733	7463856	9245589	0.192712	37.5788	1.04727	0.796381
NMF13_8-cell stage embryo_motif3	Indel	58	137	195	2563575	6682014	9245589	0.277275	54.0687	1.10349	0.529421
NMF13_8-cell stage embryo_motif4	Indel	51	144	195	2988693	6256896	9245589	0.323256	63.0349	0.741456	0.0653813
NMF13_8-cell stage embryo_motif5	Indel	9	186	195	730731	8514858	9245589	0.0790356	15.4119	0.563832	0.0887698
NMF13_8-cell stage embryo_motif6	Indel	85	110	195	4535267	4710322	9245589	0.490533	95.6539	0.802553	0.126969
NMF13_8-cell stage embryo_motif7	Indel	107	88	195	5821320	3424269	9245589	0.629632	122.778	0.715233	0.0192932
NMF13_8-cell stage embryo_motif8	Indel	119	76	195	6276132	2969457	9245589	0.678824	132.371	0.74083	0.0403021
NMF13_8-cell stage embryo_motif9	Indel	118	77	195	6336647	2908942	9245589	0.68537	133.647	0.703504	0.0158227
NMF13_8-cell stage embryo_motif	Indel	190	5	195	9102338	143251	9245589	0.984506	191.979	0.598037	0.25127
NMF09_Upper respiratory_motif10	Indel	4	61	65	386929	2760644	3147573	0.122929	7.99041	0.467853	0.13172
NMF09_Upper respiratory_motif1	Indel	1	64	65	109517	3038056	3147573	0.0347941	2.26162	0.433445	0.393159
NMF09_Upper respiratory_motif2	Indel	1	64	65	122874	3024699	3147573	0.0390377	2.53745	0.384629	0.324833
NMF09_Upper respiratory_motif3	Indel	3	62	65	118201	3029372	3147573	0.0375531	2.44095	1.24011	0.715305
NMF09_Upper respiratory_motif4	Indel	3	62	65	241594	2905979	3147573	0.0767556	4.98912	0.582017	0.354026
NMF09_Upper respiratory_motif5	Indel	1	64	65	120345	3027228	3147573	0.0382342	2.48522	0.39304	0.336718
NMF09_Upper respiratory_motif6	Indel	1	64	65	244277	2903296	3147573	0.077608	5.04452	0.185707	0.0607938
NMF09_Upper respiratory_motif7	Indel	8	57	65	168819	2978754	3147573	0.0536347	3.48625	2.47644	0.0129547
NMF09_Upper respiratory_motif8	Indel	3	62	65	359852	2787721	3147573	0.114327	7.43124	0.374848	0.0841207
NMF09_Upper respiratory_motif9	Indel	4	61	65	301317	2846256	3147573	0.0957299	6.22245	0.619413	0.348801
NMF09_Upper respiratory_motif	Indel	22	43	65	1580986	1566587	3147573	0.502287	32.6487	0.506968	0.0082506
NMF10_Muscle_motif10	Indel	4	51	55	144563	3063539	3208102	0.0450618	2.4784	1.6621	0.322629
NMF10_Muscle_motif1	Indel	0	55	55	23892	3184210	3208102	0.00744739	0.409607	0	0.520612
NMF10_Muscle_motif2	Indel	1	54	55	59483	3148619	3208102	0.0185415	1.01978	0.980242	0.984224
NMF10_Muscle_motif3	Indel	1	54	55	75355	3132747	3208102	0.023489	1.29189	0.769874	0.794957
NMF10_Muscle_motif4	Indel	6	49	55	123079	3085023	3208102	0.0383651	2.11008	3.06923	0.00631848
NMF10_Muscle_motif5	Indel	4	51	55	158116	3049986	3208102	0.0492865	2.71076	1.51291	0.421922
NMF10_Muscle_motif6	Indel	0	55	55	66965	3141137	3208102	0.0208737	1.14805	0	0.278882
NMF10_Muscle_motif7	Indel	0	55	55	70746	3137356	3208102	0.0220523	1.21288	0	0.265428
NMF10_Muscle_motif8	Indel	2	53	55	100432	3107670	3208102	0.0313057	1.72182	1.16766	0.829455
NMF10_Muscle_motif9	Indel	1	54	55	81011	3127091	3208102	0.025252	1.38886	0.71483	0.738222
NMF10_Muscle_motif	Indel	16	39	55	773890	2434212	3208102	0.24123	13.2676	1.29043	0.389148
NMF11_Endocrine_motif10	Indel	5	101	106	368456	4347076	4715532	0.0781367	8.28249	0.584064	0.234863
NMF11_Endocrine_motif1	Indel	4	102	106	188346	4527186	4715532	0.0399416	4.23381	0.942609	0.907675
NMF11_Endocrine_motif2	Indel	3	103	106	430362	4285170	4715532	0.0912648	9.67407	0.290013	0.0243882
NMF11_Endocrine_motif3	Indel	4	102	106	306957	4408575	4715532	0.0650949	6.90006	0.563223	0.25353
NMF11_Endocrine_motif4	Indel	18	88	106	342834	4372698	4715532	0.0727031	7.70653	2.60889	0.000117853
NMF11_Endocrine_motif5	Indel	9	97	106	382787	4332745	4715532	0.0811758	8.60463	1.05021	0.888178
NMF11_Endocrine_motif6	Indel	18	88	106	874056	3841476	4715532	0.185357	19.6478	0.898977	0.680428
NMF11_Endocrine_motif7	Indel	12	94	106	682427	4033105	4715532	0.144719	15.3402	0.754461	0.356448
NMF11_Endocrine_motif8	Indel	7	99	106	537106	4178426	4715532	0.113901	12.0736	0.550067	0.120866
NMF11_Endocrine_motif9	Indel	5	101	106	228027	4487505	4715532	0.0483566	5.1258	0.974243	0.954579
NMF11_Endocrine_motif	Indel	54	52	106	2860771	1854761	4715532	0.60667	64.307	0.673279	0.040424
NMF12_Liver_motif10	Indel	4	45	49	400591	1920532	2321123	0.172585	8.45666	0.426155	0.0920269
NMF12_Liver_motif1	Indel	3	46	49	130301	2190822	2321123	0.0561371	2.75072	1.09654	0.87705
NMF12_Liver_motif2	Indel	0	49	49	66741	2254382	2321123	0.0287538	1.40893	0	0.228424
NMF12_Liver_motif3	Indel	1	48	49	55094	2266029	2321123	0.0237359	1.16306	0.85688	0.878378
NMF12_Liver_motif4	Indel	4	45	49	222990	2098133	2321123	0.0960699	4.70742	0.836364	0.731642
NMF12_Liver_motif5	Indel	1	48	49	79802	2241321	2321123	0.0343808	1.68466	0.585126	0.591404
NMF12_Liver_motif6	Indel	4	45	49	282473	2038650	2321123	0.121697	5.96314	0.641524	0.390997
NMF12_Liver_motif7	Indel	3	46	49	121298	2199825	2321123	0.0522583	2.56066	1.18276	0.777927
NMF12_Liver_motif8	Indel	3	46	49	213912	2107211	2321123	0.0921588	4.51578	0.642446	0.454082
NMF12_Liver_motif9	Indel	7	42	49	405060	1916063	2321123	0.17451	8.55101	0.788386	0.559368
NMF12_Liver_motif	Indel	21	28	49	1361731	959392	2321123	0.586669	28.7468	0.528404	0.0246153
NMF15_ICM embryo_motif10	Indel	21	28	49	1490805	577376	2068181	0.720829	35.3206	0.290469	5.10314e-06
NMF15_ICM embryo_motif1	Indel	1	48	49	104651	1963530	2068181	0.0506005	2.47942	0.390889	0.334917
NMF15_ICM embryo_motif2	Indel	0	49	49	53613	2014568	2068181	0.0259228	1.27022	0	0.25348
NMF15_ICM embryo_motif3	Indel	5	44	49	522570	1545611	2068181	0.252671	12.3809	0.336104	0.015246
NMF15_ICM embryo_motif4	Indel	6	43	49	290946	1777235	2068181	0.140677	6.89318	0.852345	0.713627
NMF15_ICM embryo_motif5	Indel	7	42	49	464800	1603381	2068181	0.224739	11.0122	0.574936	0.169703
NMF15_ICM embryo_motif6	Indel	10	39	49	406087	1662094	2068181	0.19635	9.62114	1.04947	0.891625
NMF15_ICM embryo_motif7	Indel	14	35	49	551081	1517100	2068181	0.266457	13.0564	1.10118	0.760436
NMF15_ICM embryo_motif8	Indel	30	19	49	1334908	733273	2068181	0.64545	31.6271	0.867325	0.627046
NMF15_ICM embryo_motif9	Indel	32	17	49	1485229	582952	2068181	0.718133	35.1885	0.738823	0.311331
NMF15_ICM embryo_motif	Indel	41	8	49	2026663	41518	2068181	0.979925	48.0163	0.10499	8.90301e-13
NMF01_CNS_motif10	Indel	4	129	133	83994	5897364	5981358	0.0140426	1.86767	2.17711	0.116099
NMF01_CNS_motif1	Indel	8	125	133	255564	5725794	5981358	0.0427268	5.68266	1.43389	0.320435
NMF01_CNS_motif2	Indel	5	128	133	271673	5709685	5981358	0.04542	6.04085	0.820967	0.664691
NMF01_CNS_motif3	Indel	2	131	133	138086	5843272	5981358	0.0230861	3.07045	0.646049	0.536531
NMF01_CNS_motif4	Indel	8	125	133	462236	5519122	5981358	0.0772794	10.2782	0.764163	0.459444
NMF01_CNS_motif5	Indel	7	126	133	419223	5562135	5981358	0.0700883	9.32174	0.737096	0.430359
NMF01_CNS_motif6	Indel	3	130	133	147834	5833524	5981358	0.0247158	3.2872	0.910615	0.872565
NMF01_CNS_motif7	Indel	7	126	133	235370	5745988	5981358	0.0393506	5.23363	1.35625	0.430833
NMF01_CNS_motif8	Indel	4	129	133	284341	5697017	5981358	0.0475379	6.32254	0.621267	0.343924
NMF01_CNS_motif9	Indel	11	122	133	640228	5341130	5981358	0.107037	14.236	0.752197	0.364092
NMF01_CNS_motif	Indel	47	86	133	2229674	3751684	5981358	0.372771	49.5785	0.919569	0.643805
NMF02_Ruminal epithelium_motif10	Indel	19	145	164	515880	6902498	7418378	0.0695408	11.4047	1.75325	0.0197215
NMF02_Ruminal epithelium_motif1	Indel	5	159	164	285209	7133169	7418378	0.0384463	6.30519	0.786488	0.59606
NMF02_Ruminal epithelium_motif2	Indel	4	160	164	202206	7216172	7418378	0.0272574	4.47022	0.892181	0.821594
NMF02_Ruminal epithelium_motif3	Indel	22	142	164	255102	7163276	7418378	0.0343878	5.63961	4.35043	2.36947e-12
NMF02_Ruminal epithelium_motif4	Indel	5	159	164	107878	7310500	7418378	0.014542	2.38489	2.13102	0.0880384
NMF02_Ruminal epithelium_motif5	Indel	1	163	164	102257	7316121	7418378	0.0137843	2.26062	0.438935	0.398515
NMF02_Ruminal epithelium_motif6	Indel	1	163	164	56924	7361454	7418378	0.00767338	1.25843	0.793379	0.81711
NMF02_Ruminal epithelium_motif7	Indel	12	152	164	559475	6858903	7418378	0.0754174	12.3685	0.967858	0.913236
NMF02_Ruminal epithelium_motif8	Indel	10	154	164	454338	6964040	7418378	0.0612449	10.0442	0.995317	0.988524
NMF02_Ruminal epithelium_motif9	Indel	10	154	164	598171	6820207	7418378	0.0806337	13.2239	0.740375	0.355167
NMF02_Ruminal epithelium_motif	Indel	68	96	164	2418157	5000221	7418378	0.325968	53.4588	1.46468	0.0154174
NMF03_Immune system_motif10	Indel	2	168	170	151963	4917113	5069076	0.0299784	5.09634	0.385206	0.163739
NMF03_Immune system_motif1	Indel	5	165	170	177470	4891606	5069076	0.0350103	5.95176	0.835242	0.691266
NMF03_Immune system_motif2	Indel	3	167	170	79949	4989127	5069076	0.0157719	2.68122	1.12103	0.844428
NMF03_Immune system_motif3	Indel	23	147	170	255450	4813626	5069076	0.0503938	8.56695	2.94834	4.18669e-07
NMF03_Immune system_motif4	Indel	4	166	170	189609	4879467	5069076	0.037405	6.35886	0.620105	0.340371
NMF03_Immune system_motif5	Indel	4	166	170	160544	4908532	5069076	0.0316713	5.38411	0.736732	0.544394
NMF03_Immune system_motif6	Indel	41	129	170	195310	4873766	5069076	0.0385297	6.55005	7.93112	6.9281e-43
NMF03_Immune system_motif7	Indel	10	160	170	491047	4578029	5069076	0.0968711	16.4681	0.582687	0.0935074
NMF03_Immune system_motif8	Indel	6	164	170	282488	4786588	5069076	0.0557277	9.47371	0.619917	0.245476
NMF03_Immune system_motif9	Indel	11	159	170	185800	4883276	5069076	0.0366536	6.23112	1.81828	0.051601
NMF03_Immune system_motif	Indel	74	96	170	1667691	3401385	5069076	0.328993	55.9288	1.57217	0.00317893
NMF04_Mammary Gland_motif10	Indel	3	162	165	125245	6619275	6744520	0.0185699	3.06403	0.978715	0.970545
NMF04_Mammary Gland_motif1	Indel	7	158	165	221895	6522625	6744520	0.0329	5.42851	1.30231	0.4928
NMF04_Mammary Gland_motif2	Indel	5	160	165	161730	6582790	6744520	0.0239795	3.95661	1.27195	0.595453
NMF04_Mammary Gland_motif3	Indel	2	163	165	93181	6651339	6744520	0.0138158	2.27961	0.875839	0.852065
NMF04_Mammary Gland_motif4	Indel	7	158	165	216771	6527749	6744520	0.0321403	5.30315	1.33415	0.45387
NMF04_Mammary Gland_motif5	Indel	3	162	165	72191	6672329	6744520	0.0107037	1.7661	1.71159	0.350569
NMF04_Mammary Gland_motif6	Indel	12	153	165	260451	6484069	6744520	0.0386167	6.37175	1.95259	0.0229644
NMF04_Mammary Gland_motif7	Indel	4	161	165	223924	6520596	6744520	0.0332009	5.47815	0.72347	0.520684
NMF04_Mammary Gland_motif8	Indel	21	144	165	144428	6600092	6744520	0.0214141	3.53333	6.66431	5.81458e-21
NMF04_Mammary Gland_motif9	Indel	5	160	165	461747	6282773	6744520	0.0684625	11.2963	0.425204	0.0522623
NMF04_Mammary Gland_motif	Indel	51	114	165	1688599	5055921	6744520	0.250366	41.3104	1.33949	0.0816466
NMF14_Morula embryo_motif10	Indel	158	88	246	7939710	2910582	10850292	0.731751	180.011	0.658187	0.0015376
NMF14_Morula embryo_motif1	Indel	93	153	246	4293071	6557221	10850292	0.395664	97.3334	0.928417	0.572068
NMF14_Morula embryo_motif2	Indel	11	235	246	840877	10009415	10850292	0.0774981	19.0645	0.557187	0.0544783
NMF14_Morula embryo_motif3	Indel	70	176	246	3182677	7667615	10850292	0.293326	72.1583	0.958193	0.762466
NMF14_Morula embryo_motif4	Indel	49	197	246	1722690	9127602	10850292	0.158769	39.0572	1.31789	0.0828099
NMF14_Morula embryo_motif5	Indel	87	159	246	3693152	7157140	10850292	0.340374	83.7319	1.06039	0.66012
NMF14_Morula embryo_motif6	Indel	141	105	246	6888772	3961520	10850292	0.634893	156.184	0.772236	0.0443571
NMF14_Morula embryo_motif7	Indel	136	110	246	6682311	4167981	10850292	0.615865	151.503	0.771161	0.0421389
NMF14_Morula embryo_motif8	Indel	176	70	246	7311743	3538549	10850292	0.673875	165.773	1.2168	0.164265
NMF14_Morula embryo_motif9	Indel	174	72	246	7985778	2864514	10850292	0.735997	181.055	0.866863	0.307509
NMF14_Morula embryo_motif	Indel	242	4	246	10743702	106590	10850292	0.990176	243.583	0.60023	0.306034
NMF05_Digestive tract_motif10	Indel	2	45	47	130395	1752824	1883219	0.0692405	3.2543	0.597441	0.471094
NMF05_Digestive tract_motif1	Indel	2	45	47	67572	1815647	1883219	0.0358811	1.68641	1.19421	0.805736
NMF05_Digestive tract_motif2	Indel	0	47	47	29420	1853799	1883219	0.0156222	0.734243	0	0.387779
NMF05_Digestive tract_motif3	Indel	1	46	47	36648	1846571	1883219	0.0194603	0.914634	1.09536	0.928174
NMF05_Digestive tract_motif4	Indel	3	44	47	35573	1847646	1883219	0.0188895	0.887805	3.54133	0.0236255
NMF05_Digestive tract_motif5	Indel	1	46	47	76128	1807091	1883219	0.0404244	1.89995	0.516033	0.505085
NMF05_Digestive tract_motif6	Indel	3	44	47	111204	1772015	1883219	0.05905	2.77535	1.08646	0.889437
NMF05_Digestive tract_motif7	Indel	0	47	47	76691	1806528	1883219	0.0407234	1.914	0	0.157793
NMF05_Digestive tract_motif8	Indel	0	47	47	48891	1834328	1883219	0.0259614	1.22019	0	0.263036
NMF05_Digestive tract_motif9	Indel	0	47	47	54688	1828531	1883219	0.0290396	1.36486	0	0.235774
NMF05_Digestive tract_motif	Indel	10	37	47	555564	1327655	1883219	0.295008	13.8654	0.645876	0.216338
NMF06_Lower respiratory_motif10	Indel	5	30	35	298456	1342029	1640485	0.181932	6.3676	0.749429	0.549034
NMF06_Lower respiratory_motif1	Indel	0	35	35	78693	1561792	1640485	0.0479694	1.67893	0	0.184186
NMF06_Lower respiratory_motif2	Indel	4	31	35	126568	1513917	1640485	0.0771528	2.70035	1.54339	0.410344
NMF06_Lower respiratory_motif3	Indel	9	26	35	261878	1378607	1640485	0.159634	5.58721	1.82226	0.115258
NMF06_Lower respiratory_motif4	Indel	6	29	35	327136	1313349	1640485	0.199414	6.9795	0.830625	0.678604
NMF06_Lower respiratory_motif5	Indel	3	32	35	132580	1507905	1640485	0.0808176	2.82861	1.06627	0.915354
NMF06_Lower respiratory_motif6	Indel	5	30	35	299058	1341427	1640485	0.182299	6.38045	0.747585	0.545603
NMF06_Lower respiratory_motif7	Indel	3	32	35	198425	1442060	1640485	0.120955	4.23343	0.681331	0.522573
NMF06_Lower respiratory_motif8	Indel	3	32	35	238559	1401926	1640485	0.14542	5.08969	0.550935	0.316352
NMF06_Lower respiratory_motif9	Indel	5	30	35	379136	1261349	1640485	0.231112	8.08892	0.554484	0.215494
NMF06_Lower respiratory_motif	Indel	23	12	35	1307225	333260	1640485	0.796853	27.8898	0.488629	0.0399454
NMF07_Cerebellum_motif10	Indel	21	135	156	423811	7349154	7772965	0.0545237	8.5057	2.69743	1.05361e-05
NMF07_Cerebellum_motif1	Indel	0	156	156	72490	7700475	7772965	0.00932591	1.45484	0	0.225577
NMF07_Cerebellum_motif2	Indel	5	151	156	223223	7549742	7772965	0.0287179	4.47999	1.11992	0.803138
NMF07_Cerebellum_motif3	Indel	17	139	156	686866	7086099	7772965	0.088366	13.7851	1.26174	0.364467
NMF07_Cerebellum_motif4	Indel	11	145	156	650274	7122691	7772965	0.0836584	13.0507	0.830945	0.553177
NMF07_Cerebellum_motif5	Indel	7	149	156	253226	7519739	7772965	0.0325778	5.08213	1.3951	0.387071
NMF07_Cerebellum_motif6	Indel	12	144	156	707423	7065542	7772965	0.0910107	14.1977	0.83231	0.540703
NMF07_Cerebellum_motif7	Indel	13	143	156	513233	7259732	7772965	0.066028	10.3004	1.28592	0.384089
NMF07_Cerebellum_motif8	Indel	22	134	156	281508	7491457	7772965	0.0362163	5.64974	4.36911	2.43808e-12
NMF07_Cerebellum_motif9	Indel	6	150	156	746350	7026615	7772965	0.0960187	14.9789	0.376586	0.014684
NMF07_Cerebellum_motif	Indel	69	87	156	3377642	4395323	7772965	0.434537	67.7878	1.03206	0.844772
NMF08_Testis_motif10	Indel	7	136	143	601868	5384071	5985939	0.100547	14.3782	0.460435	0.0402008
NMF08_Testis_motif1	Indel	0	143	143	128013	5857926	5985939	0.0213856	3.05814	0	0.0771012
NMF08_Testis_motif2	Indel	0	143	143	80270	5905669	5985939	0.0134098	1.9176	0	0.163272
NMF08_Testis_motif3	Indel	7	136	143	227079	5758860	5985939	0.0379354	5.42476	1.30533	0.490489
NMF08_Testis_motif4	Indel	5	138	143	237382	5748557	5985939	0.0396566	5.67089	0.877409	0.773741
NMF08_Testis_motif5	Indel	3	140	143	177006	5808933	5985939	0.0295703	4.22855	0.703237	0.544197
NMF08_Testis_motif6	Indel	6	137	143	432891	5553048	5985939	0.072318	10.3415	0.561802	0.161013
NMF08_Testis_motif7	Indel	10	133	143	563304	5422635	5985939	0.0941045	13.4569	0.723796	0.322124
NMF08_Testis_motif8	Indel	1	142	143	95493	5890446	5985939	0.0159529	2.28126	0.434398	0.392468
NMF08_Testis_motif9	Indel	17	126	143	811261	5174678	5985939	0.135528	19.3805	0.8606	0.560853
NMF08_Testis_motif	Indel	45	98	143	2558719	3427220	5985939	0.427455	61.1261	0.615043	0.00641263
NMF16_Undefined_motif10	snp_indel	9	200	209	29047	711721	740768	0.039212	8.19531	1.10261	0.774289
NMF16_Undefined_motif1	snp_indel	11	198	209	26993	713775	740768	0.0364392	7.61579	1.46905	0.211563
NMF16_Undefined_motif2	snp_indel	11	198	209	65107	675661	740768	0.0878912	18.3693	0.576539	0.0718067
NMF16_Undefined_motif3	snp_indel	10	199	209	36681	704087	740768	0.0495175	10.3492	0.964566	0.911356
NMF16_Undefined_motif4	snp_indel	12	197	209	46437	694331	740768	0.0626876	13.1017	0.910788	0.753227
NMF16_Undefined_motif5	snp_indel	8	201	209	34760	706008	740768	0.0469243	9.80717	0.808395	0.554451
NMF16_Undefined_motif6	snp_indel	13	196	209	70031	670737	740768	0.0945384	19.7585	0.635257	0.110074
NMF16_Undefined_motif7	snp_indel	10	199	209	55156	685612	740768	0.0744579	15.5617	0.624644	0.142789
NMF16_Undefined_motif8	snp_indel	18	191	209	40966	699802	740768	0.0553021	11.5581	1.60987	0.0512366
NMF16_Undefined_motif9	snp_indel	22	187	209	83031	657737	740768	0.112088	23.4263	0.931951	0.754478
NMF16_Undefined_motif	snp_indel	96	113	209	358864	381904	740768	0.484449	101.25	0.904101	0.46746
Ubiquitous_motif10	snp_indel	18	13154	13172	113016	45481018	45594034	0.00247875	32.65	0.550687	0.0102565
Ubiquitous_motif1	snp_indel	28	13144	13172	186505	45407529	45594034	0.00409056	53.8808	0.518642	0.00041078
Ubiquitous_motif2	snp_indel	8	13164	13172	83520	45510514	45594034	0.00183182	24.1287	0.331149	0.00101448
Ubiquitous_motif3	snp_indel	391	12781	13172	464743	45129291	45594034	0.0101931	134.263	2.97069	7.10044e-110
Ubiquitous_motif4	snp_indel	57	13115	13172	317976	45276058	45594034	0.00697407	91.8625	0.618843	0.000262105
Ubiquitous_motif5	snp_indel	14	13158	13172	64232	45529802	45594034	0.00140878	18.5565	0.754193	0.289833
Ubiquitous_motif6	snp_indel	31	13141	13172	133814	45460220	45594034	0.0029349	38.6585	0.801426	0.217367
Ubiquitous_motif7	snp_indel	17	13155	13172	95305	45498729	45594034	0.0020903	27.5334	0.616938	0.0444821
Ubiquitous_motif8	snp_indel	38	13134	13172	207675	45386359	45594034	0.00455487	59.9968	0.632307	0.00442253
Ubiquitous_motif9	snp_indel	80	13092	13172	141715	45452319	45594034	0.00310819	40.9411	1.95986	9.72434e-10
Ubiquitous_motif	snp_indel	679	12493	13172	1786469	43807565	45594034	0.0391821	516.106	1.33277	2.5739e-13
NMF13_8-cell stage embryo_motif10	snp_indel	1117	538	1655	6454619	2790970	9245589	0.69813	1155.4	0.89775	0.0397456
NMF13_8-cell stage embryo_motif1	snp_indel	149	1506	1655	882052	8363537	9245589	0.0954025	157.891	0.938117	0.456902
NMF13_8-cell stage embryo_motif2	snp_indel	266	1389	1655	1781733	7463856	9245589	0.192712	318.938	0.802232	0.000969866
NMF13_8-cell stage embryo_motif3	snp_indel	431	1224	1655	2563575	6682014	9245589	0.277275	458.891	0.917819	0.125642
NMF13_8-cell stage embryo_motif4	snp_indel	557	1098	1655	2988693	6256896	9245589	0.323256	534.989	1.06201	0.247354
NMF13_8-cell stage embryo_motif5	snp_indel	144	1511	1655	730731	8514858	9245589	0.0790356	130.804	1.1105	0.229249
NMF13_8-cell stage embryo_motif6	snp_indel	840	815	1655	4535267	4710322	9245589	0.490533	811.832	1.07046	0.166041
NMF13_8-cell stage embryo_motif7	snp_indel	1031	624	1655	5821320	3424269	9245589	0.629632	1042.04	0.971898	0.574098
NMF13_8-cell stage embryo_motif8	snp_indel	1134	521	1655	6276132	2969457	9245589	0.678824	1123.45	1.02982	0.578785
NMF13_8-cell stage embryo_motif9	snp_indel	1098	557	1655	6336647	2908942	9245589	0.68537	1134.29	0.904946	0.0547534
NMF13_8-cell stage embryo_motif	snp_indel	1621	34	1655	9102338	143251	9245589	0.984506	1629.36	0.750324	0.0962418
NMF09_Upper respiratory_motif10	snp_indel	57	510	567	386929	2760644	3147573	0.122929	69.7009	0.797414	0.104286
NMF09_Upper respiratory_motif1	snp_indel	15	552	567	109517	3038056	3147573	0.0347941	19.7283	0.753818	0.278567
NMF09_Upper respiratory_motif2	snp_indel	22	545	567	122874	3024699	3147573	0.0390377	22.1344	0.993684	0.976756
NMF09_Upper respiratory_motif3	snp_indel	23	544	567	118201	3029372	3147573	0.0375531	21.2926	1.08358	0.706048
NMF09_Upper respiratory_motif4	snp_indel	33	534	567	241594	2905979	3147573	0.0767556	43.5205	0.743325	0.096975
NMF09_Upper respiratory_motif5	snp_indel	12	555	567	120345	3027228	3147573	0.0382342	21.6788	0.543883	0.0340334
NMF09_Upper respiratory_motif6	snp_indel	41	526	567	244277	2903296	3147573	0.077608	44.0038	0.926418	0.637298
NMF09_Upper respiratory_motif7	snp_indel	27	540	567	168819	2978754	3147573	0.0536347	30.4109	0.882233	0.524908
NMF09_Upper respiratory_motif8	snp_indel	54	513	567	359852	2787721	3147573	0.114327	64.8233	0.815458	0.153169
NMF09_Upper respiratory_motif9	snp_indel	35	532	567	301317	2846256	3147573	0.0957299	54.2789	0.621451	0.00592682
NMF09_Upper respiratory_motif	snp_indel	241	326	567	1580986	1566587	3147573	0.502287	284.797	0.732531	0.000234487
NMF10_Muscle_motif10	snp_indel	31	604	635	144563	3063539	3208102	0.0450618	28.6143	1.08765	0.648105
NMF10_Muscle_motif1	snp_indel	2	633	635	23892	3184210	3208102	0.00744739	4.7291	0.421091	0.207793
NMF10_Muscle_motif2	snp_indel	13	622	635	59483	3148619	3208102	0.0185415	11.7738	1.10632	0.718322
NMF10_Muscle_motif3	snp_indel	12	623	635	75355	3132747	3208102	0.023489	14.9155	0.800768	0.444908
NMF10_Muscle_motif4	snp_indel	23	612	635	123079	3085023	3208102	0.0383651	24.3618	0.942	0.778437
NMF10_Muscle_motif5	snp_indel	31	604	635	158116	3049986	3208102	0.0492865	31.2969	0.990026	0.956592
NMF10_Muscle_motif6	snp_indel	12	623	635	66965	3141137	3208102	0.0208737	13.2548	0.903508	0.727604
NMF10_Muscle_motif7	snp_indel	11	624	635	70746	3137356	3208102	0.0220523	14.0032	0.781754	0.417052
NMF10_Muscle_motif8	snp_indel	13	622	635	100432	3107670	3208102	0.0313057	19.8791	0.646719	0.116969
NMF10_Muscle_motif9	snp_indel	17	618	635	81011	3127091	3208102	0.025252	16.035	1.06183	0.807167
NMF10_Muscle_motif	snp_indel	136	499	635	773890	2434212	3208102	0.24123	153.181	0.85727	0.111017
NMF11_Endocrine_motif10	snp_indel	60	877	937	368456	4347076	4715532	0.0781367	73.2141	0.807167	0.107738
NMF11_Endocrine_motif1	snp_indel	37	900	937	188346	4527186	4715532	0.0399416	37.4253	0.988169	0.943436
NMF11_Endocrine_motif2	snp_indel	83	854	937	430362	4285170	4715532	0.0912648	85.5151	0.96773	0.775408
NMF11_Endocrine_motif3	snp_indel	54	883	937	306957	4408575	4715532	0.0650949	60.9939	0.878322	0.354355
NMF11_Endocrine_motif4	snp_indel	65	872	937	342834	4372698	4715532	0.0727031	68.1228	0.950742	0.694385
NMF11_Endocrine_motif5	snp_indel	58	879	937	382787	4332745	4715532	0.0811758	76.0617	0.74687	0.0307319
NMF11_Endocrine_motif6	snp_indel	206	731	937	874056	3841476	4715532	0.185357	173.679	1.23854	0.00658357
NMF11_Endocrine_motif7	snp_indel	115	822	937	682427	4033105	4715532	0.144719	135.602	0.826817	0.0557476
NMF11_Endocrine_motif8	snp_indel	107	830	937	537106	4178426	4715532	0.113901	106.726	1.0029	0.977495
NMF11_Endocrine_motif9	snp_indel	61	876	937	228027	4487505	4715532	0.0483566	45.3101	1.37039	0.0168769
NMF11_Endocrine_motif	snp_indel	555	382	937	2860771	1854761	4715532	0.60667	568.45	0.941964	0.368403
NMF12_Liver_motif10	snp_indel	64	382	446	400591	1920532	2321123	0.172585	76.9729	0.803225	0.10404
NMF12_Liver_motif1	snp_indel	16	430	446	130301	2190822	2321123	0.0561371	25.0371	0.62562	0.0630246
NMF12_Liver_motif2	snp_indel	6	440	446	66741	2254382	2321123	0.0287538	12.8242	0.46061	0.0531601
NMF12_Liver_motif3	snp_indel	9	437	446	55094	2266029	2321123	0.0237359	10.5862	0.847076	0.621721
NMF12_Liver_motif4	snp_indel	44	402	446	222990	2098133	2321123	0.0960699	42.8472	1.02985	0.853039
NMF12_Liver_motif5	snp_indel	7	439	446	79802	2241321	2321123	0.0343808	15.3338	0.447841	0.0303273
NMF12_Liver_motif6	snp_indel	51	395	446	282473	2038650	2321123	0.121697	54.2767	0.931835	0.635085
NMF12_Liver_motif7	snp_indel	20	426	446	121298	2199825	2321123	0.0522583	23.3072	0.851442	0.481635
NMF12_Liver_motif8	snp_indel	50	396	446	213912	2107211	2321123	0.0921588	41.1028	1.24379	0.145254
NMF12_Liver_motif9	snp_indel	62	384	446	405060	1916063	2321123	0.17451	77.8316	0.763749	0.0482556
NMF12_Liver_motif	snp_indel	239	207	446	1361731	959392	2321123	0.586669	261.654	0.813453	0.0293756
NMF15_ICM embryo_motif10	snp_indel	249	142	391	1490805	577376	2068181	0.720829	281.844	0.679124	0.000213316
NMF15_ICM embryo_motif1	snp_indel	11	380	391	104651	1963530	2068181	0.0506005	19.7848	0.543129	0.0426683
NMF15_ICM embryo_motif2	snp_indel	10	381	391	53613	2014568	2068181	0.0259228	10.1358	0.98625	0.965525
NMF15_ICM embryo_motif3	snp_indel	73	318	391	522570	1545611	2068181	0.252671	98.7945	0.678971	0.00268249
NMF15_ICM embryo_motif4	snp_indel	37	354	391	290946	1777235	2068181	0.140677	55.0048	0.638456	0.00882279
NMF15_ICM embryo_motif5	snp_indel	80	311	391	464800	1603381	2068181	0.224739	87.8728	0.887361	0.340164
NMF15_ICM embryo_motif6	snp_indel	95	296	391	406087	1662094	2068181	0.19635	76.7728	1.31362	0.0203134
NMF15_ICM embryo_motif7	snp_indel	101	290	391	551081	1517100	2068181	0.266457	104.185	0.958787	0.715643
NMF15_ICM embryo_motif8	snp_indel	248	143	391	1334908	733273	2068181	0.64545	252.371	0.952643	0.644015
NMF15_ICM embryo_motif9	snp_indel	272	119	391	1485229	582952	2068181	0.718133	280.79	0.897142	0.323132
NMF15_ICM embryo_motif	snp_indel	374	17	391	2026663	41518	2068181	0.979925	383.151	0.45069	0.0009685
NMF01_CNS_motif10	snp_indel	19	1230	1249	83994	5897364	5981358	0.0140426	17.5392	1.08457	0.725385
NMF01_CNS_motif1	snp_indel	41	1208	1249	255564	5725794	5981358	0.0427268	53.3657	0.760419	0.0836132
NMF01_CNS_motif2	snp_indel	45	1204	1249	271673	5709685	5981358	0.04542	56.7295	0.78551	0.110951
NMF01_CNS_motif3	snp_indel	19	1230	1249	138086	5843272	5981358	0.0230861	28.8345	0.653665	0.0638871
NMF01_CNS_motif4	snp_indel	73	1176	1249	462236	5519122	5981358	0.0772794	96.522	0.741177	0.0126865
NMF01_CNS_motif5	snp_indel	77	1172	1249	419223	5562135	5981358	0.0700883	87.5402	0.871685	0.242717
NMF01_CNS_motif6	snp_indel	36	1213	1249	147834	5833524	5981358	0.0247158	30.87	1.17111	0.349822
NMF01_CNS_motif7	snp_indel	39	1210	1249	235370	5745988	5981358	0.0393506	49.1489	0.786852	0.139677
NMF01_CNS_motif8	snp_indel	63	1186	1249	284341	5697017	5981358	0.0475379	59.3748	1.0643	0.629758
NMF01_CNS_motif9	snp_indel	127	1122	1249	640228	5341130	5981358	0.107037	133.69	0.944299	0.540373
NMF01_CNS_motif	snp_indel	428	821	1249	2229674	3751684	5981358	0.372771	465.59	0.877173	0.0278288
NMF02_Ruminal epithelium_motif10	snp_indel	110	1152	1262	515880	6902498	7418378	0.0695408	87.7605	1.27761	0.0138517
NMF02_Ruminal epithelium_motif1	snp_indel	39	1223	1262	285209	7133169	7418378	0.0384463	48.5192	0.797549	0.16342
NMF02_Ruminal epithelium_motif2	snp_indel	23	1239	1262	202206	7216172	7418378	0.0272574	34.3989	0.662475	0.0487733
NMF02_Ruminal epithelium_motif3	snp_indel	70	1192	1262	255102	7163276	7418378	0.0343878	43.3975	1.649	3.96505e-05
NMF02_Ruminal epithelium_motif4	snp_indel	17	1245	1262	107878	7310500	7418378	0.014542	18.352	0.925324	0.750548
NMF02_Ruminal epithelium_motif5	snp_indel	16	1246	1262	102257	7316121	7418378	0.0137843	17.3958	0.918734	0.736132
NMF02_Ruminal epithelium_motif6	snp_indel	10	1252	1262	56924	7361454	7418378	0.00767338	9.6838	1.03291	0.918755
NMF02_Ruminal epithelium_motif7	snp_indel	76	1186	1262	559475	6858903	7418378	0.0754174	95.1768	0.785603	0.0409272
NMF02_Ruminal epithelium_motif8	snp_indel	76	1186	1262	454338	6964040	7418378	0.0612449	77.2911	0.982225	0.879525
NMF02_Ruminal epithelium_motif9	snp_indel	85	1177	1262	598171	6820207	7418378	0.0806337	101.76	0.823407	0.0831417
NMF02_Ruminal epithelium_motif	snp_indel	412	850	1262	2418157	5000221	7418378	0.325968	411.372	1.00227	0.969923
NMF03_Immune system_motif10	snp_indel	29	1001	1030	151963	4917113	5069076	0.0299784	30.8778	0.937424	0.731515
NMF03_Immune system_motif1	snp_indel	19	1011	1030	177470	4891606	5069076	0.0350103	36.0606	0.517999	0.00382645
NMF03_Immune system_motif2	snp_indel	10	1020	1030	79949	4989127	5069076	0.0157719	16.2451	0.611803	0.118333
NMF03_Immune system_motif3	snp_indel	53	977	1030	255450	4813626	5069076	0.0503938	51.9056	1.02223	0.876127
NMF03_Immune system_motif4	snp_indel	34	996	1030	189609	4879467	5069076	0.037405	38.5272	0.878482	0.457239
NMF03_Immune system_motif5	snp_indel	32	998	1030	160544	4908532	5069076	0.0316713	32.6214	0.980341	0.911964
NMF03_Immune system_motif6	snp_indel	83	947	1030	195310	4873766	5069076	0.0385297	39.6856	2.1871	2.34771e-12
NMF03_Immune system_motif7	snp_indel	84	946	1030	491047	4578029	5069076	0.0968711	99.7772	0.827835	0.0965056
NMF03_Immune system_motif8	snp_indel	49	981	1030	282488	4786588	5069076	0.0557277	57.3995	0.846356	0.253906
NMF03_Immune system_motif9	snp_indel	35	995	1030	185800	4883276	5069076	0.0366536	37.7532	0.924508	0.648005
NMF03_Immune system_motif	snp_indel	334	696	1030	1667691	3401385	5069076	0.328993	338.863	0.978763	0.74708
NMF04_Mammary Gland_motif10	snp_indel	38	1435	1473	125245	6619275	6744520	0.0185699	27.3534	1.39953	0.0398967
NMF04_Mammary Gland_motif1	snp_indel	43	1430	1473	221895	6522625	6744520	0.0329	48.4618	0.883909	0.424983
NMF04_Mammary Gland_motif2	snp_indel	29	1444	1473	161730	6582790	6744520	0.0239795	35.3218	0.817429	0.281623
NMF04_Mammary Gland_motif3	snp_indel	31	1442	1473	93181	6651339	6744520	0.0138158	20.3507	1.53454	0.0174479
NMF04_Mammary Gland_motif4	snp_indel	56	1417	1473	216771	6527749	6744520	0.0321403	47.3427	1.19009	0.200918
NMF04_Mammary Gland_motif5	snp_indel	22	1451	1473	72191	6672329	6744520	0.0107037	15.7665	1.40136	0.114486
NMF04_Mammary Gland_motif6	snp_indel	58	1415	1473	260451	6484069	6744520	0.0386167	56.8824	1.02045	0.879871
NMF04_Mammary Gland_motif7	snp_indel	47	1426	1473	223924	6520596	6744520	0.0332009	48.9049	0.959765	0.781757
NMF04_Mammary Gland_motif8	snp_indel	58	1415	1473	144428	6600092	6744520	0.0214141	31.543	1.87314	1.91683e-06
NMF04_Mammary Gland_motif9	snp_indel	103	1370	1473	461747	6282773	6744520	0.0684625	100.845	1.02297	0.824075
NMF04_Mammary Gland_motif	snp_indel	389	1084	1473	1688599	5055921	6744520	0.250366	368.789	1.07447	0.22416
NMF14_Morula embryo_motif10	snp_indel	1509	712	2221	7939710	2910582	10850292	0.731751	1625.22	0.776935	2.60516e-08
NMF14_Morula embryo_motif1	snp_indel	834	1387	2221	4293071	6557221	10850292	0.395664	878.77	0.91842	0.0520502
NMF14_Morula embryo_motif2	snp_indel	189	2032	2221	840877	10009415	10850292	0.0774981	172.123	1.10717	0.180466
NMF14_Morula embryo_motif3	snp_indel	605	1616	2221	3182677	7667615	10850292	0.293326	651.478	0.901949	0.0303002
NMF14_Morula embryo_motif4	snp_indel	301	1920	2221	1722690	9127602	10850292	0.158769	352.626	0.830644	0.0027224
NMF14_Morula embryo_motif5	snp_indel	828	1393	2221	3693152	7157140	10850292	0.340374	755.97	1.15192	0.00125695
NMF14_Morula embryo_motif6	snp_indel	1270	951	2221	6888772	3961520	10850292	0.634893	1410.1	0.767968	6.64216e-10
NMF14_Morula embryo_motif7	snp_indel	1226	995	2221	6682311	4167981	10850292	0.615865	1367.84	0.76854	6.10698e-10
NMF14_Morula embryo_motif8	snp_indel	1629	592	2221	7311743	3538549	10850292	0.673875	1496.68	1.33169	2.10679e-09
NMF14_Morula embryo_motif9	snp_indel	1685	536	2221	7985778	2864514	10850292	0.735997	1634.65	1.12764	0.0153593
NMF14_Morula embryo_motif	snp_indel	2196	25	2221	10743702	106590	10850292	0.990176	2199.18	0.871475	0.49366
NMF05_Digestive tract_motif10	snp_indel	15	297	312	130395	1752824	1883219	0.0692405	21.603	0.67891	0.140875
NMF05_Digestive tract_motif1	snp_indel	7	305	312	67572	1815647	1883219	0.0358811	11.1949	0.616684	0.201648
NMF05_Digestive tract_motif2	snp_indel	1	311	312	29420	1853799	1883219	0.0156222	4.87412	0.202609	0.0769507
NMF05_Digestive tract_motif3	snp_indel	4	308	312	36648	1846571	1883219	0.0194603	6.07161	0.654372	0.395864
NMF05_Digestive tract_motif4	snp_indel	7	305	312	35573	1847646	1883219	0.0188895	5.89351	1.19206	0.645408
NMF05_Digestive tract_motif5	snp_indel	9	303	312	76128	1807091	1883219	0.0404244	12.6124	0.705075	0.299091
NMF05_Digestive tract_motif6	snp_indel	21	291	312	111204	1772015	1883219	0.05905	18.4236	1.14993	0.536053
NMF05_Digestive tract_motif7	snp_indel	11	301	312	76691	1806528	1883219	0.0407234	12.7057	0.860848	0.625145
NMF05_Digestive tract_motif8	snp_indel	10	302	312	48891	1834328	1883219	0.0259614	8.09996	1.24234	0.498757
NMF05_Digestive tract_motif9	snp_indel	11	301	312	54688	1828531	1883219	0.0290396	9.06037	1.2219	0.513143
NMF05_Digestive tract_motif	snp_indel	77	235	312	555564	1327655	1883219	0.295008	92.0424	0.783022	0.0618498
NMF06_Lower respiratory_motif10	snp_indel	72	304	376	298456	1342029	1640485	0.181932	68.4063	1.06498	0.630943
NMF06_Lower respiratory_motif1	snp_indel	12	364	376	78693	1561792	1640485	0.0479694	18.0365	0.654285	0.145188
NMF06_Lower respiratory_motif2	snp_indel	27	349	376	126568	1513917	1640485	0.0771528	29.0095	0.925372	0.697744
NMF06_Lower respiratory_motif3	snp_indel	49	327	376	261878	1378607	1640485	0.159634	60.0226	0.788842	0.120662
NMF06_Lower respiratory_motif4	snp_indel	65	311	376	327136	1313349	1640485	0.199414	74.9797	0.839083	0.197718
NMF06_Lower respiratory_motif5	snp_indel	19	357	376	132580	1507905	1640485	0.0808176	30.3874	0.605315	0.0311891
NMF06_Lower respiratory_motif6	snp_indel	84	292	376	299058	1341427	1640485	0.182299	68.5442	1.29035	0.0389738
NMF06_Lower respiratory_motif7	snp_indel	29	347	376	198425	1442060	1640485	0.120955	45.4791	0.607373	0.00915297
NMF06_Lower respiratory_motif8	snp_indel	44	332	376	238559	1401926	1640485	0.14542	54.6778	0.778832	0.118271
NMF06_Lower respiratory_motif9	snp_indel	93	283	376	379136	1261349	1640485	0.231112	86.8982	1.09329	0.455372
NMF06_Lower respiratory_motif	snp_indel	271	105	376	1307225	333260	1640485	0.796853	299.617	0.65798	0.000244448
NMF07_Cerebellum_motif10	snp_indel	90	1472	1562	423811	7349154	7772965	0.0545237	85.1661	1.06023	0.590097
NMF07_Cerebellum_motif1	snp_indel	13	1549	1562	72490	7700475	7772965	0.00932591	14.5671	0.891521	0.679963
NMF07_Cerebellum_motif2	snp_indel	42	1520	1562	223223	7549742	7772965	0.0287179	44.8573	0.934542	0.665101
NMF07_Cerebellum_motif3	snp_indel	136	1426	1562	686866	7086099	7772965	0.088366	138.028	0.983908	0.856551
NMF07_Cerebellum_motif4	snp_indel	133	1429	1562	650274	7122691	7772965	0.0836584	130.674	1.01945	0.831701
NMF07_Cerebellum_motif5	snp_indel	68	1494	1562	253226	7519739	7772965	0.0325778	50.8865	1.35161	0.0147239
NMF07_Cerebellum_motif6	snp_indel	122	1440	1562	707423	7065542	7772965	0.0910107	142.159	0.846182	0.0761692
NMF07_Cerebellum_motif7	snp_indel	103	1459	1562	513233	7259732	7772965	0.066028	103.136	0.998592	0.988971
NMF07_Cerebellum_motif8	snp_indel	66	1496	1562	281508	7491457	7772965	0.0362163	56.5699	1.17405	0.201555
NMF07_Cerebellum_motif9	snp_indel	126	1436	1562	746350	7026615	7772965	0.0960187	149.981	0.826075	0.0394413
NMF07_Cerebellum_motif	snp_indel	649	913	1562	3377642	4395323	7772965	0.434537	678.747	0.92502	0.128913
NMF08_Testis_motif10	snp_indel	100	1086	1186	601868	5384071	5985939	0.100547	119.249	0.82372	0.0630842
NMF08_Testis_motif1	snp_indel	14	1172	1186	128013	5857926	5985939	0.0213856	25.3633	0.546626	0.0225572
NMF08_Testis_motif2	snp_indel	7	1179	1186	80270	5905669	5985939	0.0134098	15.904	0.436818	0.0245873
NMF08_Testis_motif3	snp_indel	34	1152	1186	227079	5758860	5985939	0.0379354	44.9914	0.74849	0.0947907
NMF08_Testis_motif4	snp_indel	37	1149	1186	237382	5748557	5985939	0.0396566	47.0327	0.779817	0.135486
NMF08_Testis_motif5	snp_indel	34	1152	1186	177006	5808933	5985939	0.0295703	35.0704	0.968578	0.854423
NMF08_Testis_motif6	snp_indel	61	1125	1186	432891	5553048	5985939	0.072318	85.7691	0.695553	0.00548959
NMF08_Testis_motif7	snp_indel	126	1060	1186	563304	5422635	5985939	0.0941045	111.608	1.14428	0.15234
NMF08_Testis_motif8	snp_indel	9	1177	1186	95493	5890446	5985939	0.0159529	18.9201	0.471675	0.0215025
NMF08_Testis_motif9	snp_indel	132	1054	1186	811261	5174678	5985939	0.135528	160.736	0.798833	0.014778
NMF08_Testis_motif	snp_indel	415	771	1186	2558719	3427220	5985939	0.427455	506.962	0.720963	6.7477e-08
