# Supplementary material for: An organism-wide ATAC-seq peak catalog for the bovine and its use to identify regulatory variants
Source: HighWire-hosted journal article supplement (doi:10.1101/gr.277947.123), 2023-09-26
Supplement: Supplemental_Table_S11.xlsx [file Supplemental_Table_S11.xlsx]

## Sheet: STable_S11_eQTL_DNA_RNA_ID
Suppl. Table S11: Correspondence between DNA genotyping and RNA-seq ID used for eQTL analyses. All 240 animals were genotyped with Illumina BovineHD Genotyping BeadChips (777,962 SNPs) and imputed to whole genome. Stranded total RNA-seq data using Holstein liver and whole blood biopsies collected in six European countries have been published previously (e.g. Wathes et al., J. Dairy Sci. 2021, Lee…
	Genotyping		Suppl. Information		RNA-Seq
	Genotype sample ID	Genotype Call Rates	Country	Lactation Number	Liver Postpartum ~14 days	Blood Postpartum ~14 days	Liver Postpartum ~35 days	Blood Postpartum ~35 days	RNA-Seq excluded from eQTL analysis
1	201879670021_R06C01	0.994381	BEL	5	Liver050270	Blood050053	NA	NA
2	201879670021_R05C01	0.993897	BEL	6	NA	Blood050051	NA	NA
3	201879670021_R08C01	0.994618	BEL	5	Liver050294	Blood050057	NA	NA
4	201879670162_R01C01	0.994516	BEL	4	Liver050295	Blood050059	NA	NA
5	201879670162_R02C01	0.994896	BEL	4	Liver050296	Blood050061	NA	NA
6	201879670093_R05C01	0.994542	BEL	3	Liver050285	Blood050035	NA	NA
7	201879670021_R07C01	0.994403	BEL	6	Liver050293	Blood050055	NA	NA
8	201879670021_R04C01	0.993827	BEL	4	Liver050292	Blood050049	NA	NA
9	201879670171_R04C01	0.995276	BEL	3	Liver050272	Blood050001	NA	NA
10	201879670171_R05C01	0.995058	BEL	2	Liver050273	Blood050003	NA	NA
11	201879670171_R06C01	0.995786	BEL	2	Liver050274	Blood050005	NA	NA
12	201879670171_R07C01	0.99496	BEL	2	NA	Blood050007	NA	NA
13	201879670171_R08C01	0.995371	BEL	2	Liver050275	Blood050009	NA	NA
14	201879670160_R01C01	0.994915	BEL	2	Liver050276	Blood050011	NA	NA
15	201879670160_R02C01	0.994781	BEL	2	Liver050277	Blood050013	NA	NA
16	201879670160_R03C01	0.995085	BEL	2	Liver050278	Blood050015	NA	NA
17	201879670160_R05C01	0.995184	BEL	2	Liver050280	Blood050019	NA	NA
18	201879670160_R06C01	0.995154	BEL	1	NA	Blood050021	NA	NA
19	201879670160_R07C01	0.995109	BEL	1	Liver050281	Blood050023	NA	NA
20	201879670160_R04C01	0.994996	BEL	2	Liver050279	Blood050017	NA	NA
21	201879670160_R08C01	0.99537	BEL	1	NA	Blood050025	NA	NA
22	201879670093_R01C01	0.99383	BEL	1	Liver050283	Blood050027	NA	NA
23	201879670093_R02C01	0.994482	BEL	1	Liver050269	Blood050029	NA	NA	Liver0500269 was excluded as an outlier in PCA analysis on gene expression
24	201879670093_R03C01	0.994543	BEL	1	Liver050271	Blood050031	NA	NA
25	201879670093_R04C01	0.994505	BEL	1	NA	Blood050033	NA	NA
26	201879670093_R06C01	0.994668	BEL	1	Liver050286	Blood050037	NA	NA
27	201879670093_R07C01	0.994812	BEL	1	Liver050287	NA	NA	NA
28	201879670093_R08C01	0.994819	BEL	1	Liver050288	Blood050041	NA	NA
29	201879670021_R01C01	0.993037	BEL	1	Liver050289	Blood050043	NA	NA
30	201879670021_R02C01	0.993271	BEL	1	Liver050290	Blood050045	NA	NA
31	201879670021_R03C01	0.993943	BEL	1	Liver050291	Blood050047	NA	NA
32	201879670161_R02C01	0.994712	DEU	3	Liver040298	NA	NA	NA
33	201879670162_R08C01	0.994927	DEU	2	NA	Blood040009	NA	NA
34	201879670161_R03C01	0.994822	DEU	2	Liver040299	Blood040012	NA	NA
35	201879890051_R08C01	0.992921	DEU	3	Liver040311	NA	NA	NA
36	201879890051_R04C01	0.993009	DEU	3	Liver040308	Blood040022	NA	NA
37	201316080038_R06C01	0.979752	DEU	3	Liver040313	Blood040028	NA	NA
38	201879670161_R08C01	0.99477	DEU	3	Liver040304	Blood040018	NA	NA
39	201879670059_R02C01	0.993961	DEU	3	Liver040314	Blood040029	NA	NA
40	201879670161_R06C01	0.995199	DEU	2	Liver040302	Blood040016	NA	NA
41	201879890051_R05C01	0.993365	DEU	3	Liver040309	Blood040023	NA	NA
42	201879670162_R03C01	0.995001	DEU	2	NA	Blood040002	NA	NA
43	201879670161_R05C01	0.994546	DEU	2	NA	Blood040014	NA	NA
44	201879890051_R03C01	0.993113	DEU	3	Liver040307	Blood040021	NA	NA
45	201879890051_R02C01	0.99356	DEU	3	Liver040306	Blood040020	NA	NA
46	201879890051_R01C01	0.993158	DEU	3	Liver040305	NA	NA	NA
47	201879890051_R07C01	0.994128	DEU	3	Liver040310	Blood040025	NA	NA
48	201879670161_R07C01	0.995076	DEU	3	Liver040303	Blood040017	NA	NA
49	201879670161_R01C01	0.994851	DEU	2	Liver040297	Blood040010	NA	NA
50	201879670162_R04C01	0.994907	DEU	2	NA	Blood040003	NA	NA
51	201879670059_R01C01	0.993543	DEU	3	Liver040312	Blood040027	NA	NA
52	201879890051_R06C01	0.993946	DEU	3	NA	Blood040024	NA	NA
53	201879670162_R05C01	0.994759	DEU	3	NA	Blood040004	NA	NA
54	201879670162_R07C01	0.994978	DEU	1	NA	Blood040007	NA	NA
55	201316080038_R05C01	0.987834	DNK	6	Liver030249	Blood030055	NA	NA
56	201879670091_R02C01	0.994383	DNK	5	Liver030224	Blood030030	Liver030250	Blood030056
57	201879670091_R03C01	0.994452	DNK	5	Liver030213	Blood030019	NA	Blood030036
58	201879670091_R04C01	0.994673	DNK	5	Liver030242	Blood030048	NA	NA
59	201879670091_R05C01	0.994423	DNK	5	Liver030198	Blood030003	NA	NA
60	201879670091_R06C01	0.99479	DNK	4	Liver030209	Blood030015	NA	NA
61	201879670091_R07C01	0.994729	DNK	3	Liver030205	Blood030009	NA	NA
62	201879670091_R08C01	0.995038	DNK	3	Liver030203	Blood030008	NA	NA
63	201879670092_R01C01	0.993739	DNK	3	Liver030202	Blood030011	NA	NA
64	201879670092_R02C01	0.994372	DNK	3	Liver030243	Blood030049	NA	NA
65	201879670092_R03C01	0.9945	DNK	2	Liver030199	Blood030001	NA	NA
66	201879670092_R04C01	0.994608	DNK	2	Liver030207	Blood030013	NA	NA
67	201879670092_R05C01	0.994325	DNK	2	Liver030201	Blood030004	NA	NA
68	201879670092_R06C01	0.994585	DNK	2	Liver030212	Blood030018	NA	Blood030039
69	201879670092_R07C01	0.99478	DNK	2	Liver030214	Blood030020	NA	NA
70	201879670092_R08C01	0.994732	DNK	2	Liver030200	Blood030005	NA	NA
71	201879670070_R01C01	0.99405	DNK	2	Liver030215	Blood030021	NA	NA
72	201879670070_R02C01	0.993483	DNK	2	Liver030236	Blood030042	NA	NA
73	201879670070_R03C01	0.993419	DNK	2	Liver030196	Blood030006	NA	NA
74	201879670070_R04C01	0.993956	DNK	2	Liver030204	Blood030010	NA	NA
75	201879670070_R05C01	0.993925	DNK	2	Liver030237	Blood030043	NA	NA
76	201879670070_R06C01	0.994099	DNK	2	Liver030208	Blood030014	NA	Blood030044
77	201879670070_R07C01	0.993803	DNK	2	Liver030197	NA	NA	NA
78	201879670070_R08C01	0.994405	DNK	2	Liver030211	Blood030017	NA	NA
79	201879670089_R01C01	0.994907	DNK	1	Liver030251	Blood030057	NA	Blood030070
80	201879670089_R02C01	0.994969	DNK	1	Liver030222	Blood030028	NA	Blood030053
81	201879670089_R03C01	0.994846	DNK	1	Liver030195	Blood030007	NA	NA
82	201879670089_R04C01	0.994771	DNK	1	Liver030240	Blood030046	NA	NA
83	201879670089_R05C01	0.994541	DNK	1	Liver030245	Blood030051	NA	NA
84	201879670089_R06C01	0.994767	DNK	1	Liver030241	Blood030047	NA	NA
85	201879670089_R07C01	0.994887	DNK	1	Liver030246	Blood030052	NA	NA
86	201879670089_R08C01	0.994816	DNK	1	Liver030227	Blood030033	NA	Blood030058
87	201879670171_R01C01	0.994928	DNK	1	Liver030248	Blood030054	NA	NA
88	201879670171_R02C01	0.994614	DNK	1	Liver030220	Blood030026	NA	NA
89	201879670171_R03C01	0.995121	DNK	1	Liver030229	Blood030035	NA	NA
90	201879670003_R01C01	0.992005	GBR	7	Liver020088	Blood020121	NA	Blood020122
91	201879670157_R04C01	0.986799	GBR	7	Liver020155	Blood020123	NA	NA
92	201879670097_R01C01	0.988699	GBR	5	Liver020132	Blood020028	NA	NA
93	201879670059_R07C01	0.993111	GBR	5	Liver020076	Blood020003	NA	NA
94	201879670094_R08C01	0.990601	GBR	6	Liver020075	Blood020001	NA	Blood020002
95	201879670042_R01C01	0.991826	GBR	5	Liver020133	Blood020005	NA	NA
96	201879670097_R07C01	0.99319	GBR	5	Liver020077	Blood020009	NA	NA
97	201879670097_R08C01	0.991717	GBR	5	NA	Blood020007	NA	NA
98	201879670157_R03C01	0.993495	GBR	4	NA	Blood020015	NA	NA
99	201879670097_R06C01	0.993294	GBR	5	Liver020089	Blood020011	NA	NA
100	201879670042_R06C01	0.993198	GBR	4	Liver020090	Blood020017	NA	NA
101	201879670059_R08C01	0.992802	GBR	4	Liver020156	Blood020013	NA	Blood020014
103	201879670094_R05C01	0.991345	GBR	3	Liver020190	Blood020029	NA	NA
104	201879670094_R06C01	0.993239	GBR	3	Liver020093	Blood020031	NA	Blood020032
105	201879890001_R07C01	0.994059	GBR	4	Liver020092	Blood020023	NA	Blood020024
106	201879670003_R07C01	0.993736	GBR	4	Liver020078	Blood020021	NA	Blood020022
107	201879670094_R04C01	0.992277	GBR	4	Liver020115	Blood020025	NA	NA
108	201879670157_R02C01	0.993477	GBR	4	Liver020091	Blood020019	NA	NA
109	201879670097_R04C01	0.993029	GBR	3	Liver020094	Blood020035	NA	NA
110	201879670003_R03C01	0.992207	GBR	3	Liver020145	Blood020065	NA	NA
111	201879670042_R02C01	0.992691	GBR	3	Liver020144	Blood020061	NA	NA
112	201879670003_R04C01	0.993908	GBR	3	Liver020106	Blood020063	NA	Blood020064
113	201879670097_R03C01	0.992731	GBR	3	Liver020104	Blood020037	NA	NA
114	201879670097_R02C01	0.992934	GBR	3	Liver020140	Blood020039	NA	NA
115	201879670046_R08C01	0.993457	GBR	3	Liver020095	Blood020041	NA	NA
116	201879670046_R04C01	0.992874	GBR	3	NA	Blood020043	NA	NA
117	201879670090_R07C01	0.990435	GBR	3	NA	Blood020045	NA	Blood020046
118	201879670090_R08C01	0.992488	GBR	3	Liver020158	Blood020047	NA	Blood020048
119	201879670094_R07C01	0.992402	GBR	3	Liver020079	Blood020033	NA	NA
120	201879670094_R01C01	0.991827	GBR	3	Liver020117	Blood020049	NA	NA
121	201879670094_R02C01	0.992482	GBR	3	Liver020096	Blood020051	NA	NA
122	201879670094_R03C01	0.992997	GBR	3	Liver020097	Blood020053	NA	NA
123	201879670046_R03C01	0.993203	GBR	3	Liver020080	Blood020055	NA	NA
124	201879670003_R05C01	0.992483	GBR	3	Liver020105	Blood020057	NA	Blood020058
125	201316080023_R06C01	0.984468	GBR	3	Liver020119	Blood020059	NA	NA
126	201879670003_R02C01	0.993369	GBR	2	Liver020146	Blood020067	NA	Blood020068
127	201879670090_R03C01	0.991505	GBR	2	Liver020098	Blood020069	NA	NA
128	201879670090_R01C01	0.991672	GBR	2	Liver020081	Blood020071	NA	NA
129	201879670046_R05C01	0.99227	GBR	2	Liver020121	Blood020073	NA	Blood020074
130	201879670090_R06C01	0.991854	GBR	2	Liver020107	Blood020075	NA	NA
131	201879670090_R05C01	0.991243	GBR	2	Liver020108	Blood020077	NA	Blood020078
132	201879670090_R04C01	0.992673	GBR	2	Liver020109	Blood020079	NA	NA
133	201879670003_R06C01	0.993043	GBR	2	Liver020082	Blood020081	NA	NA
134	201316080023_R07C01	0.983998	GBR	2	Liver020123	Blood020083	NA	Blood020084
135	201879670046_R01C01	0.992254	GBR	1	Liver020083	Blood020085	NA	NA
136	201879670046_R02C01	0.992312	GBR	1	Liver020164	Blood020087	NA	NA
137	201879670166_R01C01	0.994135	GBR	1	Liver020084	Blood020089	NA	NA
138	201879890001_R08C01	0.992843	GBR	1	Liver020148	Blood020091	NA	NA
139	201879670090_R02C01	0.99043	GBR	1	Liver020110	Blood020093	NA	NA
140	201879670046_R06C01	0.993272	GBR	1	Liver020085	Blood020095	NA	Blood020096
141	201879670046_R07C01	0.99357	GBR	1	Liver020127	Blood020097	NA	NA
142	201879670157_R05C01	0.993059	GBR	1	Liver020099	Blood020099	NA	NA
143	201879670157_R06C01	0.991997	GBR	1	Liver020100	Blood020101	NA	NA
144	201879670157_R07C01	0.994117	GBR	1	Liver020086	Blood020103	NA	Blood020104
145	201879670097_R05C01	0.993371	GBR	1	Liver020101	Blood020105	NA	Blood020106
146	201879670157_R08C01	0.993668	GBR	1	Liver020152	Blood020107	NA	NA
147	201879670042_R04C01	0.992829	GBR	1	Liver020102	Blood020109	NA	NA
148	201879670157_R01C01	0.993534	GBR	1	Liver020087	Blood020111	NA	Blood020112
149	201879670003_R08C01	0.993989	GBR	1	Liver020154	Blood020113	NA	NA
150	201879670042_R08C01	0.992529	GBR	1	Liver020130	Blood020115	NA	NA
151	201879670042_R07C01	0.992168	GBR	1	Liver020165	Blood020117	NA	NA
152	201879670042_R05C01	0.992237	GBR	1	Liver020166	Blood020119	NA	NA
153	201879890031_R07C01	0.992412	IRL	7	Liver010001	Blood010001	Liver010039	Blood010039	Liver010001 was excluded as an outlier in PCA analysis on gene expression
154	201879890053_R06C01	0.992911	IRL	4	Liver010008	Blood010008	NA	NA
155	200078640114_R08C01	0.986017	IRL	2	Liver010026	Blood010026	NA	NA
156	200078640195_R07C01	0.988048	IRL	2	Liver010033	Blood010033	NA	NA
157	201879890053_R08C01	0.993378	IRL	4	Liver010010	Blood010010	NA	NA
158	201316080023_R01C01	0.987451	IRL	2	Liver010027	Blood010027	NA	NA
159	200078640156_R04C01	0.994971	IRL	4	Liver010014	Blood010014	NA	NA
160	200078640114_R02C01	0.993914	IRL	3	Liver010020	Blood010020	NA	NA
161	200078640195_R03C01	0.993276	IRL	2	Liver010029	Blood010029	NA	NA
162	200078640195_R08C01	0.99037	IRL	2	Liver010034	Blood010034	NA	Blood010072
163	201316080023_R04C01	0.986138	IRL	1	Liver010037	Blood010037	NA	NA
164	201316080023_R03C01	0.986128	IRL	1	Liver010036	Blood010036	NA	NA
165	201879890053_R05C01	0.980251	IRL	5	Liver010007	Blood010007	NA	NA
166	200078640156_R06C01	0.993556	IRL	3	Liver010016	Blood010016	NA	NA
167	200078640156_R02C01	0.994519	IRL	4	Liver010012	Blood010012	NA	NA
168	200078640195_R02C01	0.982268	IRL	2	Liver010028	Blood010028	NA	NA
169	201879890053_R02C01	0.986837	IRL	4	Liver010004	Blood010004	Liver010042	Blood010042
170	200078640114_R05C01	0.993961	IRL	3	Liver010023	Blood010023	NA	NA
171	200078640156_R07C01	0.995387	IRL	3	Liver010017	Blood010017	NA	NA
172	200078640195_R04C01	0.993093	IRL	2	Liver010030	Blood010030	NA	NA
173	201879890053_R01C01	0.989363	IRL	7	Liver010003	Blood010003	Liver010041	NA
174	201879890053_R03C01	0.985471	IRL	5	Liver010005	Blood010005	Liver010043	Blood010043
175	200078640156_R03C01	0.995274	IRL	4	Liver010013	Blood010013	NA	NA
176	200078640114_R03C01	0.992802	IRL	3	Liver010021	Blood010021	NA	NA
177	200078640114_R01C01	0.99422	IRL	3	Liver010019	Blood010019	NA	NA
178	200078640114_R07C01	0.993743	IRL	2	Liver010025	Blood010025	NA	NA
179	200078640195_R06C01	0.987519	IRL	2	Liver010032	Blood010032	NA	NA
180	201316080023_R02C01	0.987064	IRL	2	Liver010035	Blood010035	NA	Blood010073
181	200078640195_R05C01	0.993131	IRL	2	Liver010031	Blood010031	NA	NA
182	200078640114_R06C01	0.993704	IRL	3	Liver010024	Blood010024	NA	NA
183	200078640156_R08C01	0.995356	IRL	3	Liver010018	Blood010018	NA	NA
184	201879890031_R08C01	0.983812	IRL	7	Liver010002	Blood010002	Liver010040	NA
185	201879890053_R04C01	0.987362	IRL	5	Liver010006	Blood010006	NA	NA	Blood010006 was removed because condordance between RNA and DNA genotypes was low.
186	201879890053_R07C01	0.99257	IRL	3	Liver010009	Blood010009	NA	NA
187	201316080023_R05C01	0.986026	IRL	1	Liver010038	Blood010038	NA	NA
188	200078640156_R05C01	0.994754	IRL	4	Liver010015	Blood010015	NA	NA
189	200078640156_R01C01	0.994387	IRL	4	Liver010011	Blood010011	NA	NA
190	200078640114_R04C01	0.994648	IRL	3	Liver010022	Blood010022	NA	NA
191	201879670166_R02C01	0.994698	ITA	5	NA	Blood060019	NA	NA
192	201879670166_R03C01	0.995177	ITA	6	NA	Blood060047	NA	NA
193	201879670166_R04C01	0.99451	ITA	4	NA	Blood060009	NA	NA
194	201879670166_R05C01	0.994736	ITA	4	NA	Blood060069	NA	NA
195	201879670166_R06C01	0.995285	ITA	4	NA	Blood060013	NA	NA
196	201879670166_R07C01	0.995118	ITA	4	NA	Blood060031	NA	NA
197	201879670166_R08C01	0.995394	ITA	4	NA	Blood060033	NA	NA
198	201879890028_R01C01	0.994412	ITA	4	NA	Blood060063	NA	NA
199	201879890028_R02C01	0.994	ITA	4	NA	Blood060075	NA	NA
200	201879890028_R03C01	0.994013	ITA	4	NA	Blood060061	NA	NA
201	201879890028_R04C01	0.99473	ITA	4	NA	Blood060057	NA	NA
202	201879890028_R05C01	0.994525	ITA	4	NA	Blood060085	NA	NA
203	201879890028_R06C01	0.995133	ITA	3	NA	Blood060089	NA	NA
204	201879890028_R07C01	0.995034	ITA	3	NA	Blood060079	NA	NA
206	201879890046_R01C01	0.993033	ITA	3	NA	Blood060083	NA	NA
207	201879890046_R02C01	0.99411	ITA	3	NA	Blood060049	NA	NA
208	201879890046_R03C01	0.993718	ITA	3	NA	Blood060007	NA	NA
209	201879890046_R04C01	0.993446	ITA	3	NA	Blood060039	NA	NA
210	201879890046_R05C01	0.993813	ITA	3	NA	Blood060073	NA	NA
211	201879890046_R06C01	0.994109	ITA	3	NA	Blood060051	NA	NA
212	201879890046_R07C01	0.994302	ITA	3	NA	Blood060077	NA	NA
213	201879890046_R08C01	0.993826	ITA	2	NA	Blood060045	NA	NA
215	201879670108_R02C01	0.994442	ITA	2	NA	Blood060029	NA	NA
216	201879670108_R03C01	0.993973	ITA	2	NA	Blood060059	NA	NA
217	201879670108_R04C01	0.99433	ITA	2	NA	Blood060041	NA	NA
218	201879670108_R05C01	0.994731	ITA	2	NA	Blood060067	NA	NA
219	201879670108_R06C01	0.994613	ITA	2	NA	Blood060037	NA	NA
220	201879670108_R07C01	0.994943	ITA	2	NA	Blood060011	NA	NA
221	201879670108_R08C01	0.994191	ITA	2	NA	Blood060035	NA	NA
222	201879670114_R01C01	0.993105	ITA	2	NA	Blood060043	NA	NA
223	201879670114_R02C01	0.993754	ITA	1	NA	Blood060055	NA	NA
224	201879670114_R03C01	0.994487	ITA	2	NA	Blood060065	NA	NA
225	201879670114_R04C01	0.993818	ITA	2	NA	Blood060087	NA	NA
226	201879670114_R05C01	0.993915	ITA	2	NA	Blood060071	NA	NA
227	201879670114_R06C01	0.993953	ITA	2	NA	Blood060053	NA	NA
228	201879670114_R07C01	0.99339	ITA	2	NA	Blood060081	NA	NA
229	201879670114_R08C01	0.99277	ITA	1	NA	Blood060003	NA	NA
230	201879890031_R01C01	0.992748	ITA	1	NA	Blood060015	NA	NA	Blood060015 was removed because condordance between RNA and DNA genotypes was low.
231	201879890031_R02C01	0.992782	ITA	1	NA	Blood060021	NA	NA
232	201879890031_R03C01	0.993825	ITA	1	NA	Blood060027	NA	NA
233	201879890031_R04C01	0.994285	ITA	1	NA	Blood060017	NA	NA
234	201879890031_R05C01	0.993838	ITA	1	NA	Blood060025	NA	NA	Blood060025 was removed as this individual seems to be identical with Blood060023 by DNA genotypes.
235	201879890031_R06C01	0.994583	ITA	1	NA	Blood060023	NA	NA
236	201316080023_R08C01	0.982202	GBR	NA	Liver020189	NA	NA	NA
237	201316080038_R01C01	0.988092	GBR	NA	Liver020191	NA	NA	NA
238	201316080038_R02C01	0.988795	GBR	NA	Liver020192	NA	NA	NA
239	201316080038_R03C01	0.98926	GBR	NA	Liver020193	NA	NA	NA
240	201316080038_R04C01	0.989597	GBR	NA	Liver020194	NA	NA	NA
