# Supplementary material for: An organism-wide ATAC-seq peak catalog for the bovine and its use to identify regulatory variants
Source: HighWire-hosted journal article supplement (doi:10.1101/gr.277947.123), 2023-09-26
Supplement: Supplemental_Table_S12.xlsx [file Supplemental_Table_S12.xlsx]

## Sheet: STable_S12-1_Liver_eQTL
Suppl. Table S12-1: A list of 6,172 significant cis-eQTL in liver.
Gene information				Variant information
Gene ID	Gene name	Chromosome of gene	TSS position of gene	Variant ID	Chromosome of variant	Variant position	REF	ALT	MAF	Beta	Adjusted p-valule
ENSBTAG00000020035	RCAN1	Chr1	882082	1:997749:T:G	Chr1	997749	G	T	0.092803	0.831133	4.4119e-09
ENSBTAG00000011528	SMIM11A	Chr1	1118312	1:2088950:G:C	Chr1	2088950	G	C	0.306818	-0.6659	9.35909e-10
ENSBTAG00000012594	MRPS6	Chr1	1455219	1:1715855:C:A	Chr1	1715855	A	C	0.409091	0.295406	0.00174256
ENSBTAG00000021997	ITSN1	Chr1	1908788	1:1863644:T:C	Chr1	1863644	C	T	0.170455	0.399212	1.64563e-05
ENSBTAG00000008490	CRYZL1	Chr1	1909499	1:1448446:G:GA	Chr1	1448446	G	GA	0.36553	0.386115	0.0005044
ENSBTAG00000035175	DONSON	Chr1	1942816	1:1844040:AAAAAAAG:A	Chr1	1844040	AAAAAAAG	A	0.0397727	1.08495	9.3638e-10
ENSBTAG00000009187	DNAJC28	Chr1	2028901	1:2028190:A:C	Chr1	2028190	A	C	0.304924	0.172479	5.59159e-11
ENSBTAG00000001258	TMEM50B	Chr1	2046734	1:2999731:C:T	Chr1	2999731	C	T	0.416667	-0.163936	0.00232826
ENSBTAG00000012899	IFNGR2	Chr1	2124278	1:1600410:G:A	Chr1	1600410	G	A	0.363636	0.231832	0.0011138
ENSBTAG00000019404	IL10RB	Chr1	2314142	1:2292045:A:C	Chr1	2292045	C	A	0.361742	0.633955	3.06487e-14
ENSBTAG00000043993	C1H21orf62	Chr1	2749169	1:2241050:C:G	Chr1	2241050	C	G	0.0776515	0.790408	6.3212e-10
ENSBTAG00000003064	PAXBP1	Chr1	2786813	1:2761831:C:CT	Chr1	2761831	C	CT	0.0890151	0.63387	4.1396e-13
ENSBTAG00000012412	URB1	Chr1	3103264	1:3123829:A:T	Chr1	3123829	A	T	0.185606	0.327673	1.97518e-14
ENSBTAG00000023718	MRAP	Chr1	3197291	1:4075391:T:C	Chr1	4075391	C	T	0.424242	-0.414565	0.00455855
ENSBTAG00000018854	SOD1	Chr1	3833406	1:3355564:CA:C	Chr1	3355564	CA	C	0.0265152	0.500575	0.000206121
ENSBTAG00000017839	TIAM1	Chr1	4192105	1:4665481:G:T	Chr1	4665481	G	T	0.299242	-0.423755	0.00902617
ENSBTAG00000020121	RWDD2B	Chr1	7167842	1:7159282:TGG:T	Chr1	7159282	T	TGG	0.310606	0.633155	3.80965e-12
ENSBTAG00000038433	NA	Chr1	7246095	1:7269343:A:G	Chr1	7269343	A	G	0.386364	-3.03816e-07	0.00346082
ENSBTAG00000050914	CYYR1	Chr1	9868853	1:9831658:T:TA	Chr1	9831658	T	TA	0.246212	0.484483	3.15321e-05
ENSBTAG00000017753	APP	Chr1	10231297	1:10538652:A:C	Chr1	10538652	C	A	0.339015	-0.317218	3.83027e-07
ENSBTAG00000000603	JAM2	Chr1	10787934	1:10735429:G:A	Chr1	10735429	G	A	0.329545	2.59843e-07	2.31026e-06
ENSBTAG00000019542	MRPL39	Chr1	10823243	1:10363929:A:G	Chr1	10363929	A	G	0.0833333	0.342843	0.0110198
ENSBTAG00000001395	C1H21orf91	Chr1	19227895	1:19325754:T:C	Chr1	19325754	C	T	0.25	0.306677	6.48627e-07
ENSBTAG00000018704	BTG3	Chr1	19417656	1:19454085:G:C	Chr1	19454085	C	G	0.482955	0.262799	1.61437e-05
ENSBTAG00000004869	CXADR	Chr1	19502580	1:19490708:C:T	Chr1	19490708	C	T	0.234848	-0.226635	0.0199585
ENSBTAG00000019314	USP25	Chr1	21328190	1:21206834:CTTTG:C	Chr1	21206834	CTTTG	C	0.375	0.414048	3.70526e-06
ENSBTAG00000054742	NA	Chr1	22280563	1:22100359:G:A	Chr1	22100359	G	A	0.361742	0.397223	0.00606838
ENSBTAG00000012908	HSPA13	Chr1	22783877	1:21845089:A:T	Chr1	21845089	A	T	0.189394	-2.4208e-07	9.86588e-20
ENSBTAG00000046755	NA	Chr1	24414165	1:24589342:T:TTAAAA	Chr1	24589342	T	TTAAAA	0.431818	-3.71289e-07	1.02344e-05
ENSBTAG00000010462	ROBO2	Chr1	24870589	1:24496195:T:A	Chr1	24496195	T	A	0.0973282	5.10105e-07	1.65252e-10
ENSBTAG00000009851	ROBO1	Chr1	26265576	1:26541645:A:T	Chr1	26541645	A	T	0.390152	2.20434e-07	3.44908e-05
ENSBTAG00000036262	GBE1	Chr1	29419066	1:29446776:T:C	Chr1	29446776	C	T	0.170455	-0.211827	0.000339541
ENSBTAG00000007939	CHMP2B	Chr1	35381298	1:35381445:A:C	Chr1	35381445	A	C	0.242424	-0.270254	0.000186289
ENSBTAG00000007970	C1H3orf38	Chr1	36156438	1:35913486:C:T	Chr1	35913486	C	T	0.174242	0.384768	0.00603886
ENSBTAG00000006811	EPHA3	Chr1	37110685	1:36238506:T:C	Chr1	36238506	C	T	0.482955	0.1729	0.000362728
ENSBTAG00000023652	PROS1	Chr1	38267163	1:38260770:C:A	Chr1	38260770	C	A	0.369318	-0.15715	9.71376e-06
ENSBTAG00000044111	EPHA6	Chr1	41409772	1:41527248:G:C	Chr1	41527248	G	C	0.208333	0.292092	7.43863e-14
ENSBTAG00000010091	ARL6	Chr1	42010600	1:42087933:A:ATCTC	Chr1	42087933	A	ATCTC	0.420455	0.305956	0.00506695
ENSBTAG00000014889	DCBLD2	Chr1	43195312	1:43448381:C:T	Chr1	43448381	C	T	0.238636	-0.185211	0.00204899
ENSBTAG00000013662	COL8A1	Chr1	43902265	1:43888745:G:A	Chr1	43888745	G	A	0.189394	0.211773	0.0130183
ENSBTAG00000034442	LNP1	Chr1	44688567	1:44595332:C:CT	Chr1	44595332	C	CT	0.212121	7.83859e-08	0.00741866
ENSBTAG00000012140	ADGRG7	Chr1	45082066	1:45121330:A:G	Chr1	45121330	A	G	0.443182	-0.395799	0.0135479
ENSBTAG00000016363	TFG	Chr1	45155600	1:45226692:A:G	Chr1	45226692	A	G	0.168561	0.14617	0.00862494
ENSBTAG00000018731	NA	Chr1	45964100	1:46130451:T:C	Chr1	46130451	T	C	0.212121	0.812196	4.47622e-10
ENSBTAG00000000088	ALCAM	Chr1	49930776	1:49931111:T:C	Chr1	49931111	C	T	0.126894	-0.490824	3.38536e-11
ENSBTAG00000003585	CD47	Chr1	52777176	1:52442925:G:C	Chr1	52442925	C	G	0.179924	-0.313081	4.8025e-05
ENSBTAG00000005787	IFT57	Chr1	52953508	1:53062548:G:A	Chr1	53062548	G	A	0.371212	0.446357	4.21079e-11
ENSBTAG00000018397	HHLA2	Chr1	53068464	1:53012977:T:C	Chr1	53012977	C	T	0.255682	0.445726	3.09821e-05
ENSBTAG00000050173	NA	Chr1	53901977	1:53950840:G:A	Chr1	53950840	G	A	0.390152	-0.280606	0.000458228
ENSBTAG00000012646	PLCXD2	Chr1	56425479	1:56727826:T:G	Chr1	56727826	G	T	0.172348	-0.654325	0.00656039
ENSBTAG00000004601	ABHD10	Chr1	56737577	1:56477110:G:T	Chr1	56477110	T	G	0.248106	0.356056	0.0161785
ENSBTAG00000009084	ATG3	Chr1	57343709	1:57318615:A:T	Chr1	57318615	A	T	0.376894	-0.389459	1.23065e-08
ENSBTAG00000009085	SLC35A5	Chr1	57343854	1:57458470:G:A	Chr1	57458470	G	A	0.0984849	-0.403666	0.000652145
ENSBTAG00000010793	CCDC80	Chr1	57478155	1:57495041:A:G	Chr1	57495041	G	A	0.263258	0.306513	0.000107026
ENSBTAG00000021000	USF3	Chr1	58392043	1:58984686:C:T	Chr1	58984686	C	T	0.36553	-0.144969	0.0151136
ENSBTAG00000004971	GRAMD1C	Chr1	58518935	1:58964945:T:G	Chr1	58964945	T	G	0.0208333	-0.790491	0.000176848
ENSBTAG00000009014	UPK1B	Chr1	63981594	1:64281644:G:A	Chr1	64281644	G	A	0.409091	0.492824	2.77291e-05
ENSBTAG00000012581	TIMMDC1	Chr1	64275418	1:64332029:G:C	Chr1	64332029	G	C	0.0492424	0.712864	0.0196796
ENSBTAG00000009391	ADPRH	Chr1	64334746	1:64320255:C:T	Chr1	64320255	C	T	0.3125	-0.273133	0.00148974
ENSBTAG00000001464	GPR156	Chr1	65020584	1:65116507:C:CT	Chr1	65116507	C	CT	0.170455	-0.236885	2.76588e-10
ENSBTAG00000022155	FSTL1	Chr1	65198315	1:65178751:C:G	Chr1	65178751	G	C	0.369318	-0.24312	8.20207e-07
ENSBTAG00000015895	HGD	Chr1	65380604	1:65434737:C:T	Chr1	65434737	T	C	0.369318	8.49252e-08	0.00113897
ENSBTAG00000001920	POLQ	Chr1	66053204	1:66070333:A:G	Chr1	66070333	A	G	0.202652	-0.309669	4.87479e-06
ENSBTAG00000001009	HCLS1	Chr1	66145729	1:66135057:C:T	Chr1	66135057	C	T	0.316288	-0.125297	3.69845e-05
ENSBTAG00000008862	GOLGB1	Chr1	66215030	1:66293907:T:G	Chr1	66293907	T	G	0.329545	0.249339	0.000131834
ENSBTAG00000013069	IQCB1	Chr1	66293959	1:66293907:T:G	Chr1	66293907	T	G	0.329545	-5.3484e-07	1.67005e-14
ENSBTAG00000033166	NA	Chr1	66366135	1:66365274:T:C	Chr1	66365274	C	T	0.198864	-0.700063	3.03408e-12
ENSBTAG00000001442	NA	Chr1	66438935	1:66202364:TATA:T	Chr1	66202364	T	TATA	0.482955	0.530365	3.9522e-05
ENSBTAG00000004705	ILDR1	Chr1	66608853	1:66517959:G:A	Chr1	66517959	G	A	0.136364	0.496708	0.000189345
ENSBTAG00000054326	WDR5B	Chr1	66866398	1:66466828:A:C	Chr1	66466828	A	C	0.25	-0.47781	0.000978794
ENSBTAG00000021791	PARP9	Chr1	66988476	1:66981229:G:A	Chr1	66981229	G	A	0.316288	-0.295596	0.0032376
ENSBTAG00000016656	PARP14	Chr1	67012288	1:66981229:G:A	Chr1	66981229	G	A	0.316288	-0.352873	6.11332e-05
ENSBTAG00000005071	SLC49A4	Chr1	67121601	1:68032685:A:T	Chr1	68032685	T	A	0.359848	-0.306119	0.00298959
ENSBTAG00000053238	NA	Chr1	68984706	1:69048262:T:C	Chr1	69048262	C	T	0.496212	1.42536e-07	3.6526e-20
ENSBTAG00000013727	UMPS	Chr1	69127864	1:69092485:C:A	Chr1	69092485	C	A	0.290875	-0.41693	6.30848e-11
ENSBTAG00000013755	ITGB5	Chr1	69312128	1:69282694:T:C	Chr1	69282694	T	C	0.329545	0.298866	2.0532e-06
ENSBTAG00000014208	RPL35A	Chr1	70180132	1:70158003:TAAACAATACATATACATCTGCA:T	Chr1	70158003	TAAACAATACATATACATCTGCA	T	0.147727	-0.433332	1.86641e-08
ENSBTAG00000018025	IQCG	Chr1	70180445	1:69852082:T:C	Chr1	69852082	T	C	0.140152	-0.573509	0.0141645
ENSBTAG00000054586	NA	Chr1	70257370	1:70379020:G:A	Chr1	70379020	G	A	0.496212	0.55382	7.38126e-05
ENSBTAG00000001890	RUBCN	Chr1	70372269	1:70444752:TA:T	Chr1	70444752	TA	T	0.488636	-0.368523	0.000170461
ENSBTAG00000014874	FYTTD1	Chr1	70373184	1:70351217:T:C	Chr1	70351217	T	C	0.0530303	-0.493003	0.00196087
ENSBTAG00000032819	MUC20	Chr1	70460153	1:70462637:G:A	Chr1	70462637	G	A	0.119318	0.401074	8.05816e-07
ENSBTAG00000021515	ZDHHC19	Chr1	70802153	1:70798390:G:A	Chr1	70798390	G	A	0.327652	-0.412963	0.00343987
ENSBTAG00000007577	UBXN7	Chr1	70987415	1:71570414:T:C	Chr1	71570414	C	T	0.316288	-0.27052	0.0137458
ENSBTAG00000047856	PAK2	Chr1	71257815	1:70327670:T:C	Chr1	70327670	T	C	0.143939	-0.366861	2.57647e-07
ENSBTAG00000032674	SENP5	Chr1	71370901	1:71569360:GT:G	Chr1	71569360	GT	G	0.331439	-0.336946	0.019598
ENSBTAG00000008873	NCBP2	Chr1	71410588	1:71410667:C:T	Chr1	71410667	C	T	0.174242	-0.486193	7.47033e-09
ENSBTAG00000011659	PIGZ	Chr1	71440654	1:71302757:T:C	Chr1	71302757	C	T	0.441288	-0.543672	2.09844e-12
ENSBTAG00000003378	ACAP2	Chr1	72150082	1:72699214:C:T	Chr1	72699214	C	T	0.280303	0.477253	4.39369e-05
ENSBTAG00000054986	ACAP2	Chr1	72278288	1:72139569:G:C	Chr1	72139569	C	G	0.195076	0.38441	0.00179655
ENSBTAG00000014564	XXYLT1	Chr1	72326706	1:72328855:A:G	Chr1	72328855	A	G	0.107955	0.702464	4.4355e-12
ENSBTAG00000008461	LSG1	Chr1	72877166	1:72869379:C:T	Chr1	72869379	T	C	0.416667	-0.320984	2.31791e-08
ENSBTAG00000019514	OPA1	Chr1	73856448	1:73806566:T:C	Chr1	73806566	C	T	0.473485	-0.21542	6.46909e-08
ENSBTAG00000016305	ATP13A4	Chr1	73893641	1:74718291:G:A	Chr1	74718291	A	G	0.0890151	-0.462271	0.0136953
ENSBTAG00000013205	IL1RAP	Chr1	76723526	1:76606400:C:T	Chr1	76606400	C	T	0.0340909	-0.516018	0.000584182
ENSBTAG00000021025	P3H2	Chr1	77130101	1:77153366:A:G	Chr1	77153366	A	G	0.153409	-0.281678	4.33559e-06
ENSBTAG00000012467	MASP1	Chr1	80006311	1:80070898:T:C	Chr1	80070898	C	T	0.0473485	-0.911733	2.54908e-10
ENSBTAG00000005122	KNG1	Chr1	80530772	1:80548672:T:A	Chr1	80548672	T	A	0.221591	-0.400568	1.01221e-12
ENSBTAG00000001265	HRG	Chr1	80545514	1:80553824:C:T	Chr1	80553824	C	T	0.469697	-0.286989	2.38819e-08
ENSBTAG00000017531	FETUB	Chr1	80576233	1:79894259:T:C	Chr1	79894259	T	C	0.348485	-0.324383	0.000738973
ENSBTAG00000000522	AHSG	Chr1	80618915	1:81405532:G:A	Chr1	81405532	G	A	0.418561	0.241934	0.00108825
ENSBTAG00000003151	DNAJB11	Chr1	80661936	1:80664903:A:G	Chr1	80664903	A	G	0.299242	0.204497	0.00259815
ENSBTAG00000005091	DGKG	Chr1	80873609	1:80940173:GA:G	Chr1	80940173	GA	G	0.109848	0.338638	0.00637261
ENSBTAG00000014915	ETV5	Chr1	81135306	1:80520336:A:G	Chr1	80520336	A	G	0.426136	0.275464	0.00544284
ENSBTAG00000001749	SENP2	Chr1	81621312	1:81427388:C:T	Chr1	81427388	C	T	0.0511364	-0.827637	4.23419e-12
ENSBTAG00000001535	LIPH	Chr1	81636268	1:81497664:C:A	Chr1	81497664	C	A	0.0511364	-6.82686e-07	3.73708e-09
ENSBTAG00000017115	TMEM41A	Chr1	81696500	1:81697232:T:C	Chr1	81697232	C	T	0.4375	-0.245846	1.84885e-08
ENSBTAG00000019625	EHHADH	Chr1	81877675	1:81986100:C:T	Chr1	81986100	T	C	0.242424	-0.230188	3.85279e-05
ENSBTAG00000005212	C1H3orf70	Chr1	81984065	1:82116552:T:A	Chr1	82116552	T	A	0.147727	-0.621888	0.000310916
ENSBTAG00000005209	VPS8	Chr1	82377026	1:81861648:GC:G	Chr1	81861648	GC	G	0.164773	0.295483	0.00245916
ENSBTAG00000050932	NA	Chr1	82406799	1:81601593:A:C	Chr1	81601593	A	C	0.441288	0.348391	0.00466473
ENSBTAG00000019014	MAGEF1	Chr1	82499646	1:82499722:C:T	Chr1	82499722	C	T	0.492424	-0.364569	3.24896e-10
ENSBTAG00000017666	ABCC5	Chr1	83122148	1:83754000:G:T	Chr1	83754000	G	T	0.0454545	-0.280494	0.00339591
ENSBTAG00000014451	YEATS2	Chr1	83416551	1:82620065:C:T	Chr1	82620065	T	C	0.30303	-0.172504	0.0169104
ENSBTAG00000017450	KLHL24	Chr1	83481681	1:83558109:T:TA	Chr1	83558109	TA	T	0.172348	-0.234444	3.45461e-05
ENSBTAG00000049281	NA	Chr1	83653084	1:83543323:G:A	Chr1	83543323	G	A	0.0246212	-0.840976	2.43982e-05
ENSBTAG00000010394	MCF2L2	Chr1	83653155	1:83708294:C:A	Chr1	83708294	C	A	0.0643939	-0.523015	4.88109e-07
ENSBTAG00000010397	B3GNT5	Chr1	83827942	1:83605493:T:C	Chr1	83605493	C	T	0.265152	0.322743	0.0107592
ENSBTAG00000006548	MCCC1	Chr1	83960687	1:83974373:G:A	Chr1	83974373	A	G	0.244318	-0.34008	3.22375e-21
ENSBTAG00000023513	DNAJC19	Chr1	86035468	1:86039233:G:A	Chr1	86039233	G	A	0.268939	-0.42463	6.58547e-11
ENSBTAG00000005946	USP13	Chr1	87482259	1:87425695:C:G	Chr1	87425695	C	G	0.183712	0.207324	0.000536142
ENSBTAG00000002462	MRPL47	Chr1	87518535	1:87520826:CT:C	Chr1	87520826	C	CT	0.494318	-0.283619	2.96531e-08
ENSBTAG00000002460	ACTL6A	Chr1	87567798	1:87572453:GT:G	Chr1	87572453	GT	G	0.0587121	0.774621	1.35196e-07
ENSBTAG00000010485	MFN1	Chr1	87765315	1:87744917:T:C	Chr1	87744917	C	T	0.435606	0.235672	0.000419905
ENSBTAG00000037393	ZNF639	Chr1	87785489	1:88068613:G:T	Chr1	88068613	G	T	0.24053	0.496203	3.03494e-07
ENSBTAG00000048493	NAALADL2	Chr1	92436553	1:91568958:A:AT	Chr1	91568958	A	AT	0.160985	0.337283	0.00619856
ENSBTAG00000031891	NLGN1	Chr1	93897117	1:93838754:T:G	Chr1	93838754	T	G	0.477273	-0.358747	1.31852e-17
ENSBTAG00000017490	PLD1	Chr1	95742045	1:95739910:A:G	Chr1	95739910	G	A	0.138258	0.177021	0.00938923
ENSBTAG00000011742	TNIK	Chr1	96395574	1:95994557:A:C	Chr1	95994557	A	C	0.0587121	-0.536248	0.0139239
ENSBTAG00000005386	SLC2A2	Chr1	96452472	1:96721992:T:C	Chr1	96721992	T	C	0.198864	-0.28075	0.00464422
ENSBTAG00000007394	RPL22L1	Chr1	96572444	1:96894426:C:A	Chr1	96894426	A	C	0.420455	0.3008	0.0155526
ENSBTAG00000004154	SKIL	Chr1	97055587	1:97042491:C:G	Chr1	97042491	C	G	0.375	-0.189987	7.52762e-16
ENSBTAG00000001403	PRKCI	Chr1	97163222	1:97162312:AAG:A	Chr1	97162312	AAG	A	0.285985	0.448922	2.05366e-05
ENSBTAG00000039442	SEC62	Chr1	97421921	1:97417193:A:G	Chr1	97417193	A	G	0.458333	-0.133218	0.00847297
ENSBTAG00000043157	Telomerase-vert	Chr1	97612805	1:97613421:A:G	Chr1	97613421	A	G	0.445076	0.416083	3.81747e-10
ENSBTAG00000005871	MECOM	Chr1	98280870	1:98334791:C:A	Chr1	98334791	C	A	0.306818	0.212982	0.0175254
ENSBTAG00000018727	GOLIM4	Chr1	99361284	1:99451908:C:T	Chr1	99451908	C	T	0.314394	-0.111717	0.00826255
ENSBTAG00000049223	SPTSSB	Chr1	106028382	1:106028828:A:AT	Chr1	106028828	A	AT	0.308712	-1.82529e-07	1.402e-12
ENSBTAG00000016228	NMD3	Chr1	106186579	1:106190447:A:G	Chr1	106190447	A	G	0.111742	0.478703	1.01865e-05
ENSBTAG00000009263	MFSD1	Chr1	108732991	1:108778806:T:C	Chr1	108778806	T	C	0.24053	-0.296306	2.93724e-20
ENSBTAG00000014713	RARRES1	Chr1	108807497	1:109653456:C:T	Chr1	109653456	C	T	0.348485	-0.238501	0.000539527
ENSBTAG00000009336	LXN	Chr1	108867032	1:108892068:TA:T	Chr1	108892068	TA	T	0.325758	0.287906	1.71079e-07
ENSBTAG00000027795	GFM1	Chr1	108903175	1:108895232:G:C	Chr1	108895232	G	C	0.274621	0.393802	6.05555e-12
ENSBTAG00000031561	RSRC1	Chr1	109414482	1:109439017:T:TA	Chr1	109439017	TA	T	0.458333	-0.237931	0.00856511
ENSBTAG00000024643	VEPH1	Chr1	110066583	1:110069878:C:G	Chr1	110069878	C	G	0.443182	-0.124398	7.92083e-05
ENSBTAG00000018009	NA	Chr1	110642235	1:110695856:A:ATAAT	Chr1	110695856	A	ATAAT	0.142045	-0.841626	6.04893e-10
ENSBTAG00000012120	TIPARP	Chr1	110955891	1:110460837:G:A	Chr1	110460837	G	A	0.119318	-0.331462	0.000459614
ENSBTAG00000018471	SSR3	Chr1	111095639	1:111102490:G:A	Chr1	111102490	G	A	0.234848	0.124564	0.000861427
ENSBTAG00000013013	GMPS	Chr1	111804777	1:111705243:C:T	Chr1	111705243	C	T	0.149621	0.488886	1.94106e-07
ENSBTAG00000014318	SLC33A1	Chr1	111829275	1:111935594:G:A	Chr1	111935594	G	A	0.140152	-0.231472	0.003616
ENSBTAG00000008307	PLCH1	Chr1	111945805	1:112002099:T:A	Chr1	112002099	A	T	0.295455	0.163798	0.00982178
ENSBTAG00000006142	DHX36	Chr1	113326570	1:112572761:T:A	Chr1	112572761	T	A	0.0530303	-0.510474	0.00598068
ENSBTAG00000013439	ARHGEF26	Chr1	113519848	1:113503150:A:C	Chr1	113503150	C	A	0.0662879	0.427288	0.000498743
ENSBTAG00000055257	RAP2B	Chr1	114558377	1:114384232:T:TA	Chr1	114384232	T	TA	0.155303	-0.346707	0.000157977
ENSBTAG00000011569	AADAC	Chr1	116050220	1:115108610:C:T	Chr1	115108610	C	T	0.24053	-0.142518	0.000147338
ENSBTAG00000020990	P2RY14	Chr1	116847498	1:116792626:T:C	Chr1	116792626	T	C	0.172348	-0.391218	6.57687e-10
ENSBTAG00000009848	GPR171	Chr1	116891761	1:117871222:A:G	Chr1	117871222	G	A	0.145833	-0.293372	0.0180649
ENSBTAG00000023445	SIAH2	Chr1	117361865	1:117621064:A:AT	Chr1	117621064	A	AT	0.278409	-0.217052	0.012907
ENSBTAG00000031435	SELENOT	Chr1	117537602	1:117600649:A:T	Chr1	117600649	A	T	0.454545	0.213832	0.00235154
ENSBTAG00000009106	EIF2A	Chr1	117597952	1:117375351:G:A	Chr1	117375351	G	A	0.181818	0.275063	0.0142461
ENSBTAG00000018402	TSC22D2	Chr1	117718237	1:116937072:G:A	Chr1	116937072	A	G	0.371212	-0.274358	0.00987231
ENSBTAG00000011150	PFN2	Chr1	118213389	1:118227302:G:A	Chr1	118227302	A	G	0.13447	0.661676	6.683e-17
ENSBTAG00000011147	RNF13	Chr1	118350034	1:118319861:A:G	Chr1	118319861	A	G	0.0852273	-0.266464	2.7902e-06
ENSBTAG00000015163	TM4SF1	Chr1	118809504	1:118911823:T:TTA	Chr1	118911823	T	TTA	0.401515	-0.379973	2.74245e-11
ENSBTAG00000019960	TM4SF18	Chr1	118858863	1:119001316:T:C	Chr1	119001316	C	T	0.231061	0.418467	0.000162277
ENSBTAG00000002395	HPS3	Chr1	119046161	1:119353855:A:G	Chr1	119353855	A	G	0.168561	-0.236182	3.46774e-05
ENSBTAG00000045633	AGTR1	Chr1	119521250	1:119533583:GCC:G	Chr1	119533583	GCC	G	0.174242	-0.234918	1.88081e-10
ENSBTAG00000022227	PLSCR2	Chr1	121946373	1:121853788:G:T	Chr1	121853788	G	T	0.36553	0.376828	5.27935e-11
ENSBTAG00000011986	PLSCR4	Chr1	122257892	1:123051809:G:GA	Chr1	123051809	GA	G	0.340909	0.342589	0.00030247
ENSBTAG00000007933	DIPK2A	Chr1	124888751	1:125076041:G:A	Chr1	125076041	G	A	0.373106	-2.13417e-07	0.0001825
ENSBTAG00000011584	CHST2	Chr1	125874332	1:125499522:T:C	Chr1	125499522	T	C	0.285985	-0.20576	0.00668814
ENSBTAG00000011116	PAQR9	Chr1	126040065	1:126085691:A:G	Chr1	126085691	A	G	0.181818	-0.326999	0.00268273
ENSBTAG00000016026	PCOLCE2	Chr1	126132068	1:126151096:C:T	Chr1	126151096	C	T	0.371212	0.443684	1.59098e-09
ENSBTAG00000023429	PLS1	Chr1	126418836	1:126415808:T:C	Chr1	126415808	C	T	0.479167	0.387293	3.77784e-13
ENSBTAG00000011524	XRN1	Chr1	126593244	1:126390996:A:G	Chr1	126390996	A	G	0.261364	-0.0835403	0.0147214
ENSBTAG00000018138	GK5	Chr1	126736160	1:127350358:A:C	Chr1	127350358	C	A	0.215909	-0.186137	0.0101077
ENSBTAG00000015413	RASA2	Chr1	127469070	1:127445156:G:C	Chr1	127445156	G	C	0.164773	-0.343197	0.0104448
ENSBTAG00000040061	ZBTB38	Chr1	127574835	1:127855114:G:GAC	Chr1	127855114	G	GAC	0.367424	0.356015	0.000228949
ENSBTAG00000015310	SLC25A36	Chr1	128042419	1:128009883:C:T	Chr1	128009883	C	T	0.221591	0.234067	0.000771199
ENSBTAG00000051936	NA	Chr1	129414273	1:130249675:A:T	Chr1	130249675	A	T	0.25	-0.202042	0.000686672
ENSBTAG00000020028	RBP1	Chr1	129556882	1:129567524:C:T	Chr1	129567524	T	C	0.44697	-0.25764	3.47303e-11
ENSBTAG00000014843	COPB2	Chr1	129706888	1:129733519:T:C	Chr1	129733519	C	T	0.445076	-0.249377	0.000110067
ENSBTAG00000006909	PIK3CB	Chr1	130293100	1:130037185:T:C	Chr1	130037185	C	T	0.25947	0.324087	1.74569e-14
ENSBTAG00000018538	CEP70	Chr1	130531396	1:130561999:A:G	Chr1	130561999	A	G	0.248106	-0.674453	8.48729e-20
ENSBTAG00000001497	MRAS	Chr1	130773432	1:131335518:A:G	Chr1	131335518	A	G	0.363636	-0.253234	0.000291508
ENSBTAG00000015198	DZIP1L	Chr1	131015353	1:131122432:GGA:G	Chr1	131122432	GGA	G	0.238636	-0.376244	1.42378e-06
ENSBTAG00000018427	NCK1	Chr1	132292949	1:132173717:T:C	Chr1	132173717	C	T	0.414773	0.264378	0.0178573
ENSBTAG00000015221	PCCB	Chr1	133024359	1:133022807:A:C	Chr1	133022807	C	A	0.299242	0.23825	2.76499e-07
ENSBTAG00000016999	RYK	Chr1	135082835	1:135040570:T:G	Chr1	135040570	G	T	0.38447	0.208369	0.0184612
ENSBTAG00000044075	SRPRB	Chr1	135573130	1:135531590:C:T	Chr1	135531590	T	C	0.17803	0.31112	4.68236e-07
ENSBTAG00000023411	NA	Chr1	135686442	1:135674227:TA:T	Chr1	135674227	TA	T	0.282197	-0.315103	3.87111e-06
ENSBTAG00000000526	TOPBP1	Chr1	135753515	1:135753894:T:A	Chr1	135753894	T	A	0.308712	0.360314	3.56684e-17
ENSBTAG00000035556	CDV3	Chr1	135881717	1:135880720:T:C	Chr1	135880720	C	T	0.479167	0.193238	0.00243945
ENSBTAG00000005769	NPHP3	Chr1	136814838	1:136433780:G:C	Chr1	136433780	C	G	0.450758	0.211971	0.0120344
ENSBTAG00000004495	UBA5	Chr1	136905496	1:136903090:G:A	Chr1	136903090	G	A	0.227273	-0.128624	1.83185e-19
ENSBTAG00000031010	ACAD11	Chr1	136905777	1:136904020:T:TAC	Chr1	136904020	T	TAC	0.157197	0.356795	2.16494e-05
ENSBTAG00000002966	DNAJC13	Chr1	137215251	1:137202443:T:A	Chr1	137202443	T	A	0.253788	-0.293235	2.34834e-10
ENSBTAG00000011634	ACP3	Chr1	137294481	1:137350358:G:A	Chr1	137350358	G	A	0.399621	0.521809	2.83858e-09
ENSBTAG00000030942	MRPL3	Chr1	138384450	1:137387314:C:T	Chr1	137387314	C	T	0.159091	-0.416492	4.12331e-06
ENSBTAG00000018749	NUDT16	Chr1	138550417	1:138366790:C:A	Chr1	138366790	A	C	0.393939	0.471512	0.000183164
ENSBTAG00000011626	ATP2C1	Chr1	139026120	1:138853179:C:T	Chr1	138853179	C	T	0.339015	-0.209942	0.00288412
ENSBTAG00000013600	PSMG1	Chr1	139238322	1:139537506:T:C	Chr1	139537506	T	C	0.280303	-0.361771	3.13621e-05
ENSBTAG00000013602	BRWD1	Chr1	139362519	1:140208231:A:G	Chr1	140208231	A	G	0.335227	-0.208645	0.00324254
ENSBTAG00000018768	HMGN1	Chr1	139412414	1:139407459:T:G	Chr1	139407459	T	G	0.130682	-0.246214	5.17429e-12
ENSBTAG00000023106	NA	Chr1	139432042	1:139938985:G:A	Chr1	139938985	G	A	0.160985	-0.532865	0.000628137
ENSBTAG00000013629	GET1	Chr1	139443101	1:139443080:C:G	Chr1	139443080	C	G	0.189394	0.525957	2.2203e-05
ENSBTAG00000023407	B3GALT5	Chr1	139747767	1:139701661:T:TTA	Chr1	139701661	T	TTA	0.445098	-0.208381	1.1402e-09
ENSBTAG00000002029	IGSF5	Chr1	139827396	1:139925887:A:G	Chr1	139925887	A	G	0.284091	-0.352878	1.41967e-06
ENSBTAG00000004754	DSCAM	Chr1	140470932	1:141429674:G:C	Chr1	141429674	G	C	0.119318	0.579436	0.000633894
ENSBTAG00000048701	NA	Chr1	141364447	1:141346841:CAATTTAACTATTCTAAGTTAAATTTAACTTAG:C	Chr1	141346841	C	CAATTTAACTATTCTAAGTTAAATTTAACTTAG	0.371212	-0.423752	1.86958e-06
ENSBTAG00000000394	BACE2	Chr1	141381148	1:141390459:C:T	Chr1	141390459	T	C	0.373106	-0.600055	8.29315e-30
ENSBTAG00000030921	FAM3B	Chr1	141551209	1:141523822:G:C	Chr1	141523822	C	G	0.4375	-0.485941	4.98966e-09
ENSBTAG00000008471	MX2	Chr1	141621166	1:141619640:A:AG	Chr1	141619640	A	AG	0.304924	0.46333	6.23808e-07
ENSBTAG00000030913	MX1	Chr1	141677688	1:141686405:C:T	Chr1	141686405	C	T	0.331439	0.253657	1.42514e-08
ENSBTAG00000021253	PRDM15	Chr1	142132485	1:141321153:C:A	Chr1	141321153	C	A	0.128788	0.364377	0.00954177
ENSBTAG00000021259	C2CD2	Chr1	142204837	1:141277704:C:T	Chr1	141277704	C	T	0.147727	0.646856	0.000431759
ENSBTAG00000021276	TFF3	Chr1	142569246	1:142451205:C:T	Chr1	142451205	C	T	0.121212	0.411791	1.94304e-05
ENSBTAG00000021491	NDUFV3	Chr1	143119851	1:143134138:G:A	Chr1	143134138	A	G	0.4375	0.450134	7.21202e-10
ENSBTAG00000000160	CBS	Chr1	143242441	1:143199601:G:T	Chr1	143199601	T	G	0.441288	0.219633	2.73449e-06
ENSBTAG00000052654	NA	Chr1	143579818	1:143576483:G:A	Chr1	143576483	G	A	0.138258	-0.71658	1.54817e-21
ENSBTAG00000018186	PDXK	Chr1	143782381	1:143803384:A:G	Chr1	143803384	G	A	0.352273	0.522622	9.13831e-08
ENSBTAG00000000524	CSTB	Chr1	143850428	1:143867518:G:C	Chr1	143867518	G	C	0.109848	-3.80933e-07	2.39058e-10
ENSBTAG00000020456	AGPAT3	Chr1	143941827	1:143709551:C:A	Chr1	143709551	A	C	0.162879	0.285243	0.000194589
ENSBTAG00000007106	NA	Chr1	144148920	1:144152673:G:A	Chr1	144152673	G	A	0.215909	-0.308691	1.02309e-16
ENSBTAG00000014880	NA	Chr1	144234833	1:144107893:T:TA	Chr1	144107893	T	TA	0.143939	0.469683	0.00696857
ENSBTAG00000010658	PFKL	Chr1	144308712	1:143370621:C:T	Chr1	143370621	C	T	0.109848	-0.499714	9.87509e-05
ENSBTAG00000019589	CFAP410	Chr1	144352212	1:144352292:T:G	Chr1	144352292	T	G	0.094697	-1.29877	6.49731e-14
ENSBTAG00000017882	LRRC3	Chr1	144424404	1:144445921:G:C	Chr1	144445921	G	C	0.200758	-0.142742	4.35553e-15
ENSBTAG00000048090	UBE2G2	Chr1	144684327	1:144641604:T:C	Chr1	144641604	T	C	0.147727	0.222371	0.0158775
ENSBTAG00000017321	SUMO3	Chr1	144696665	1:144901367:T:C	Chr1	144901367	C	T	0.149621	0.220476	0.00245932
ENSBTAG00000021771	PTTG1IP	Chr1	144730575	1:143735659:G:A	Chr1	143735659	A	G	0.373106	-0.119492	0.0131569
ENSBTAG00000017010	SLX9	Chr1	144809575	1:144864141:A:G	Chr1	144864141	G	A	0.448864	-0.271934	3.34654e-11
ENSBTAG00000007818	POFUT2	Chr1	145103157	1:144742230:A:G	Chr1	144742230	A	G	0.225379	0.308852	1.27045e-05
ENSBTAG00000023907	COL18A1	Chr1	145202139	1:144938558:C:T	Chr1	144938558	C	T	0.257576	-0.144357	0.0144012
ENSBTAG00000024162	SLC19A1	Chr1	145325287	1:145993427:C:T	Chr1	145993427	C	T	0.329545	0.286022	0.0100175
ENSBTAG00000011802	COL6A1	Chr1	145668950	1:145694549:G:A	Chr1	145694549	G	A	0.272727	-0.231484	0.0134211
ENSBTAG00000020404	FTCD	Chr1	145863601	1:145806990:A:G	Chr1	145806990	A	G	0.284091	-0.152274	2.61532e-07
ENSBTAG00000003161	YBEY	Chr1	145972841	1:145975945:C:A	Chr1	145975945	A	C	0.471591	0.264521	3.2966e-10
ENSBTAG00000011495	DIP2A	Chr1	146121833	1:146064414:A:G	Chr1	146064414	A	G	0.361742	0.2821	6.03552e-05
ENSBTAG00000004777	S100B	Chr1	146280008	1:146167291:A:T	Chr1	146167291	A	T	0.482955	-0.511288	7.00477e-08
ENSBTAG00000005503	PRMT2	Chr1	146320300	1:145376823:G:A	Chr1	145376823	A	G	0.482955	0.380166	2.39156e-08
ENSBTAG00000043957	TDRP	Chr1	146607459	1:147042633:G:A	Chr1	147042633	G	A	0.492424	-0.410321	0.0129037
ENSBTAG00000018682	SETD4	Chr1	148341194	1:149125288:A:G	Chr1	149125288	A	G	0.119318	-0.265614	0.0149243
ENSBTAG00000023384	CBR1	Chr1	148346841	1:147399264:C:T	Chr1	147399264	C	T	0.255682	-0.218077	0.00265281
ENSBTAG00000052342	NA	Chr1	148359251	1:148261347:TA:T	Chr1	148261347	TA	T	0.17803	0.529176	0.000396605
ENSBTAG00000030629	MGC127133	Chr1	148405189	1:148221661:A:G	Chr1	148221661	A	G	0.19697	0.39768	6.49366e-15
ENSBTAG00000053201	NA	Chr1	148460222	1:148461119:A:G	Chr1	148461119	A	G	0.174242	0.355272	2.15115e-13
ENSBTAG00000014306	DOP1B	Chr1	148516598	1:148464838:T:G	Chr1	148464838	T	G	0.174242	0.306234	1.11513e-21
ENSBTAG00000011880	CHAF1B	Chr1	148657614	1:148684538:A:G	Chr1	148684538	A	G	0.390152	0.249389	0.00120392
ENSBTAG00000030585	CLDN14	Chr1	148757447	1:148744144:T:A	Chr1	148744144	T	A	0.435606	-0.315372	6.88647e-05
ENSBTAG00000033679	HLCS	Chr1	149199816	1:149183537:C:T	Chr1	149183537	C	T	0.352273	0.38138	2.45075e-08
ENSBTAG00000055107	PIGP	Chr1	149317939	1:149281613:T:C	Chr1	149281613	T	C	0.373106	0.307005	1.35738e-09
ENSBTAG00000001771	DYRK1A	Chr1	149567811	1:149538381:A:T	Chr1	149538381	A	T	0.327652	1.17782e-07	0.00915144
ENSBTAG00000020787	PIK3R4	Chr1	151476119	1:151517893:T:TA	Chr1	151517893	T	TA	0.153409	0.232383	0.00122034
ENSBTAG00000012837	COL6A6	Chr1	151680026	1:151664265:T:C	Chr1	151664265	T	C	0.323864	-0.440822	4.2737e-05
ENSBTAG00000049122	NA	Chr1	151939725	1:152166588:G:T	Chr1	152166588	T	G	0.44697	0.422233	5.95432e-10
ENSBTAG00000006479	CAPN7	Chr1	152232656	1:151376284:C:T	Chr1	151376284	C	T	0.0871212	-0.334339	0.000121478
ENSBTAG00000023377	SH3BP5	Chr1	152366452	1:152378743:A:G	Chr1	152378743	G	A	0.376894	-0.36851	3.69086e-11
ENSBTAG00000019202	EAF1	Chr1	152450842	1:153347200:G:A	Chr1	153347200	G	A	0.142045	-0.470346	0.00342783
ENSBTAG00000003718	HACL1	Chr1	152638556	1:152682874:A:G	Chr1	152682874	G	A	0.422348	-0.245698	0.000254778
ENSBTAG00000024815	ANKRD28	Chr1	152833098	1:152388517:C:T	Chr1	152388517	C	T	0.202652	-0.409834	0.000262747
ENSBTAG00000030593	NA	Chr1	153514351	1:153962848:A:G	Chr1	153962848	A	G	0.0549242	0.320888	4.91067e-09
ENSBTAG00000009942	PLCL2	Chr1	153882097	1:154033549:G:T	Chr1	154033549	G	T	0.398785	0.180156	2.23273e-06
ENSBTAG00000030581	TBC1D5	Chr1	154616588	1:154415887:A:AC	Chr1	154415887	A	AC	0.176136	0.299835	5.83107e-05
ENSBTAG00000021158	SATB1	Chr1	155525165	1:155837459:T:C	Chr1	155837459	C	T	0.475379	0.193194	4.46017e-05
ENSBTAG00000013806	EFHB	Chr1	157190548	1:157128353:C:T	Chr1	157128353	T	C	0.267045	0.365649	8.21119e-10
ENSBTAG00000046385	RAB5A	Chr1	157198502	1:157200062:GT:G	Chr1	157200062	GT	G	0.357955	0.297127	0.00188758
ENSBTAG00000000746	KAT2B	Chr1	157277142	1:157555582:C:T	Chr1	157555582	C	T	0.109848	0.345389	1.18431e-08
ENSBTAG00000049158	ZNF596	Chr1	157500089	1:157503718:C:T	Chr1	157503718	C	T	0.352273	0.342596	0.000987578
ENSBTAG00000013916	HERC2	Chr2	951758	2:1177184:A:G	Chr2	1177184	G	A	0.030303	-0.322608	8.97481e-05
ENSBTAG00000016895	NIPA2	Chr2	1044599	2:1115083:A:T	Chr2	1115083	T	A	0.410985	-0.129172	7.47074e-05
ENSBTAG00000016894	CYFIP1	Chr2	1175326	2:1135002:C:A	Chr2	1135002	A	C	0.248106	-0.365351	1.62696e-08
ENSBTAG00000014714	TUBGCP5	Chr2	1284056	2:1287246:T:C	Chr2	1287246	C	T	0.429924	-0.360323	1.77307e-11
ENSBTAG00000015841	CCDC115	Chr2	1318235	2:1318180:G:A	Chr2	1318180	A	G	0.128788	-0.694887	1.24832e-16
ENSBTAG00000003225	IMP4	Chr2	1318421	2:1334270:C:G	Chr2	1334270	C	G	0.263258	0.406615	0.0108186
ENSBTAG00000011658	PTPN18	Chr2	1322994	2:1653043:T:C	Chr2	1653043	T	C	0.0795455	5.28013e-07	6.11691e-10
ENSBTAG00000000941	PLEKHB2	Chr2	1920240	2:1921555:A:G	Chr2	1921555	A	G	0.119318	0.275653	0.00150006
ENSBTAG00000050824	HS6ST1	Chr2	4187289	2:4198026:T:C	Chr2	4198026	C	T	0.234848	-0.340222	7.65111e-06
ENSBTAG00000005444	UGGT1	Chr2	4399011	2:4324558:T:C	Chr2	4324558	C	T	0.246212	0.283465	3.69557e-05
ENSBTAG00000008089	AMMECR1L	Chr2	4601013	2:4630830:G:A	Chr2	4630830	G	A	0.0643939	0.545462	0.00575288
ENSBTAG00000053244	POLR2D	Chr2	4623474	2:4621094:A:C	Chr2	4621094	C	A	0.202652	0.482206	8.3929e-12
ENSBTAG00000006262	LIMS2	Chr2	4842240	2:4858655:G:A	Chr2	4858655	G	A	0.094697	0.299957	1.97694e-09
ENSBTAG00000039803	MYO7B	Chr2	4990264	2:4977849:G:A	Chr2	4977849	A	G	0.132576	4.57181e-07	1.67233e-09
ENSBTAG00000019177	BIN1	Chr2	5418421	2:5460360:G:A	Chr2	5460360	A	G	0.407197	0.356881	6.16041e-06
ENSBTAG00000015678	NEMP2	Chr2	5786099	2:5118776:T:A	Chr2	5118776	T	A	0.49053	-0.340779	0.00319023
ENSBTAG00000007719	MFSD6	Chr2	5881926	2:5907409:C:G	Chr2	5907409	C	G	0.344697	-0.184374	3.54576e-06
ENSBTAG00000007584	INPP1	Chr2	5970809	2:5935413:A:G	Chr2	5935413	A	G	0.257576	0.609678	2.42395e-17
ENSBTAG00000007787	HIBCH	Chr2	5980698	2:6001642:A:C	Chr2	6001642	A	C	0.350379	-0.325629	3.1189e-10
ENSBTAG00000026994	C2H2orf88	Chr2	6178350	2:6143458:A:G	Chr2	6143458	A	G	0.465909	0.571788	2.47017e-31
ENSBTAG00000012557	OSGEPL1	Chr2	6592660	2:6712304:A:G	Chr2	6712304	A	G	0.132576	0.688879	6.57391e-07
ENSBTAG00000000492	ASNSD1	Chr2	6676526	2:6673867:T:G	Chr2	6673867	T	G	0.388258	0.351508	6.54087e-08
ENSBTAG00000010498	SLC40A1	Chr2	6776417	2:6215792:A:C	Chr2	6215792	A	C	0.128788	-0.458131	0.0151318
ENSBTAG00000027020	COL5A2	Chr2	7198510	2:6711902:G:A	Chr2	6711902	G	A	0.092803	0.364469	0.00447499
ENSBTAG00000007141	GULP1	Chr2	7933339	2:8320153:TA:T	Chr2	8320153	T	TA	0.289773	0.528624	3.4922e-06
ENSBTAG00000049919	TFPI	Chr2	8776894	2:8768136:A:AT	Chr2	8768136	A	AT	0.219697	-0.521414	0.000369088
ENSBTAG00000008483	CALCRL	Chr2	8891735	2:8238221:C:T	Chr2	8238221	C	T	0.191288	0.272683	0.000965261
ENSBTAG00000050392	FAM171B	Chr2	9633357	2:10259518:A:ATG	Chr2	10259518	A	ATG	0.174242	-0.511133	0.0132804
ENSBTAG00000009777	NUP35	Chr2	13458918	2:14364946:T:C	Chr2	14364946	T	C	0.0795455	0.414847	0.00528207
ENSBTAG00000010977	FRZB	Chr2	13693339	2:13760334:C:T	Chr2	13760334	T	C	0.418561	0.471231	4.64314e-10
ENSBTAG00000000937	ITPRID2	Chr2	14751034	2:14717104:G:T	Chr2	14717104	T	G	0.403409	0.31122	0.0162623
ENSBTAG00000009257	CERKL	Chr2	14945330	2:14670657:C:G	Chr2	14670657	C	G	0.38447	0.460978	0.00215472
ENSBTAG00000043956	UBE2E3	Chr2	15731672	2:15892235:C:G	Chr2	15892235	C	G	0.136364	0.38334	0.0179824
ENSBTAG00000003120	ZNF385B	Chr2	17076722	2:17320332:A:C	Chr2	17320332	C	A	0.299587	-0.248891	0.000366251
ENSBTAG00000027875	CCDC141	Chr2	17799008	2:17773269:C:A	Chr2	17773269	A	C	0.412879	0.301795	0.0169077
ENSBTAG00000001098	PLEKHA3	Chr2	18415849	2:18449283:TG:T	Chr2	18449283	TG	T	0.458333	-0.306166	0.00295553
ENSBTAG00000001097	FKBP7	Chr2	18418696	2:18179235:T:A	Chr2	18179235	T	A	0.1875	-3.41487e-07	3.29947e-08
ENSBTAG00000014405	OSBPL6	Chr2	18696841	2:18527846:ATTTACCATATTTATTTATG:A	Chr2	18527846	ATTTACCATATTTATTTATG	A	0.30303	-0.219871	0.00357653
ENSBTAG00000009897	AGPS	Chr2	19468765	2:19312718:G:A	Chr2	19312718	G	A	0.221591	-0.241856	0.00030283
ENSBTAG00000019255	NFE2L2	Chr2	19617027	2:20140644:G:A	Chr2	20140644	G	A	0.242424	-0.260309	2.4819e-08
ENSBTAG00000006693	MTX2	Chr2	20644147	2:20583249:G:C	Chr2	20583249	G	C	0.111742	0.266722	0.00772742
ENSBTAG00000021636	GPR155	Chr2	22319665	2:22170628:T:G	Chr2	22170628	T	G	0.19697	0.277715	0.00113115
ENSBTAG00000038620	CIR1	Chr2	22397396	2:22328968:GA:G	Chr2	22328968	G	GA	0.0833333	-0.281493	0.0157167
ENSBTAG00000012966	SCRN3	Chr2	22397420	2:22397830:C:T	Chr2	22397830	T	C	0.356061	0.21954	3.00039e-28
ENSBTAG00000006970	OLA1	Chr2	22528225	2:22669804:C:G	Chr2	22669804	C	G	0.0568182	0.432774	0.012664
ENSBTAG00000000176	SP3	Chr2	22797328	2:23078323:A:G	Chr2	23078323	A	G	0.488636	0.182761	0.00218495
ENSBTAG00000001083	MAP3K20	Chr2	23558475	2:24452073:A:C	Chr2	24452073	A	C	0.0435606	-0.436398	0.00111156
ENSBTAG00000020984	RAPGEF4	Chr2	23937801	2:24472836:A:G	Chr2	24472836	A	G	0.0473485	-0.560854	9.53427e-06
ENSBTAG00000017266	ITGA6	Chr2	24179151	2:24248037:A:C	Chr2	24248037	C	A	0.352273	-0.23801	0.000827144
ENSBTAG00000019075	METAP1D	Chr2	24547937	2:24316019:C:T	Chr2	24316019	T	C	0.301136	0.222516	0.013125
ENSBTAG00000007898	CYBRD1	Chr2	24945933	2:24924619:G:A	Chr2	24924619	G	A	0.473485	0.190638	1.47203e-07
ENSBTAG00000007683	DCAF17	Chr2	25029169	2:25832426:T:G	Chr2	25832426	T	G	0.306818	-0.333592	0.0124113
ENSBTAG00000016430	METTL8	Chr2	25029283	2:25029293:C:G	Chr2	25029293	C	G	0.159091	-0.852164	4.96135e-16
ENSBTAG00000013218	GORASP2	Chr2	25556898	2:25574481:A:G	Chr2	25574481	A	G	0.479167	0.299106	1.19008e-05
ENSBTAG00000051169	ERICH2	Chr2	25694204	2:26134002:C:A	Chr2	26134002	C	A	0.373106	-0.415766	2.91876e-07
ENSBTAG00000003626	MYO3B	Chr2	26211202	2:26266688:C:A	Chr2	26266688	A	C	0.467803	0.871455	3.02053e-31
ENSBTAG00000020296	UBR3	Chr2	26517652	2:27053236:C:T	Chr2	27053236	C	T	0.0454545	0.272431	1.37388e-06
ENSBTAG00000001093	KLHL23	Chr2	26618014	2:26742445:G:GAAAA	Chr2	26742445	G	GAAAA	0.11553	-0.614434	2.25791e-08
ENSBTAG00000004555	LRP2	Chr2	26888631	2:26809295:T:TA	Chr2	26809295	T	TA	0.473485	0.3896	3.28201e-21
ENSBTAG00000026885	ABCB11	Chr2	27112409	2:27319162:T:C	Chr2	27319162	T	C	0.452652	0.244289	0.00494826
ENSBTAG00000044179	CERS6	Chr2	27712447	2:27696168:C:T	Chr2	27696168	C	T	0.284091	0.215724	0.00453817
ENSBTAG00000017162	STK39	Chr2	27870257	2:27870852:T:C	Chr2	27870852	T	C	0.363636	0.109286	5.88992e-06
ENSBTAG00000051560	NA	Chr2	28252021	2:28019949:G:C	Chr2	28019949	G	C	0.274621	-0.228648	2.2033e-05
ENSBTAG00000016512	TTC21B	Chr2	30336544	2:30733659:T:C	Chr2	30733659	C	T	0.172348	-0.414299	2.77315e-05
ENSBTAG00000013957	GALNT3	Chr2	30545765	2:30594429:T:C	Chr2	30594429	T	C	0.0359848	1.49094	0.0138583
ENSBTAG00000001899	KCNH7	Chr2	33901114	2:34169067:T:C	Chr2	34169067	T	C	0.0871212	1.29109	4.36658e-06
ENSBTAG00000008142	IFIH1	Chr2	34111731	2:34116358:G:A	Chr2	34116358	G	A	0.25947	0.230006	0.0111986
ENSBTAG00000048246	DPP4	Chr2	34382576	2:34382556:T:TTC	Chr2	34382556	T	TTC	0.19697	0.226018	3.91291e-08
ENSBTAG00000006654	TANK	Chr2	35239417	2:35050075:GAT:G	Chr2	35050075	GAT	G	0.0587121	-0.629895	0.00772728
ENSBTAG00000005180	RBMS1	Chr2	35855478	2:35756370:T:A	Chr2	35756370	T	A	0.153409	0.36869	0.0100455
ENSBTAG00000032515	PLA2R1	Chr2	36271244	2:36395577:T:C	Chr2	36395577	T	C	0.329545	-0.629383	3.7755e-14
ENSBTAG00000017797	LY75	Chr2	36454505	2:36405123:T:C	Chr2	36405123	C	T	0.395833	0.328794	6.68827e-07
ENSBTAG00000038195	CD302	Chr2	36552661	2:36531152:TAC:T	Chr2	36531152	TAC	T	0.193182	-5.52986e-07	1.03633e-14
ENSBTAG00000013773	PKP4	Chr2	37901601	2:37927227:T:C	Chr2	37927227	C	T	0.185606	0.235203	9.57176e-05
ENSBTAG00000012801	UPP2	Chr2	38262544	2:38496465:A:AT	Chr2	38496465	A	AT	0.462121	0.304552	0.000224808
ENSBTAG00000011909	ACVR1	Chr2	38466455	2:38459931:C:T	Chr2	38459931	T	C	0.287879	0.398457	5.81882e-08
ENSBTAG00000019337	ACVR1C	Chr2	38753356	2:38656681:A:G	Chr2	38656681	A	G	0.467803	0.616479	9.45964e-16
ENSBTAG00000006159	KCNJ3	Chr2	41378419	2:40859562:T:G	Chr2	40859562	T	G	0.0738636	-0.866051	0.000188732
ENSBTAG00000026851	FMNL2	Chr2	43866708	2:43321844:A:G	Chr2	43321844	A	G	0.125	-0.209704	9.38492e-05
ENSBTAG00000002293	ARL5A	Chr2	44355897	2:44608781:G:GA	Chr2	44608781	G	GA	0.198864	-0.335695	0.00302868
ENSBTAG00000032369	NMI	Chr2	44826001	2:44847484:CCT:C	Chr2	44847484	CCT	C	0.44697	-0.278278	1.37669e-05
ENSBTAG00000016217	RBM43	Chr2	44857603	2:44877571:G:T	Chr2	44877571	T	G	0.382576	0.192532	5.94055e-13
ENSBTAG00000039731	RND3	Chr2	45698140	2:45791684:T:A	Chr2	45791684	T	A	0.291667	0.0859607	0.0164126
ENSBTAG00000015962	MMADHC	Chr2	46549090	2:46565948:G:GTT	Chr2	46565948	G	GTT	0.352273	-0.299814	8.80458e-13
ENSBTAG00000018114	ACVR2A	Chr2	48374634	2:48409559:A:G	Chr2	48409559	G	A	0.431818	-0.25007	0.00152638
ENSBTAG00000001132	GTDC1	Chr2	52388548	2:53280750:A:G	Chr2	53280750	A	G	0.285985	0.503227	0.000344555
ENSBTAG00000032289	ARHGAP15	Chr2	53630365	2:53643044:A:G	Chr2	53643044	A	G	0.443182	0.225382	0.0033286
ENSBTAG00000032277	KYNU	Chr2	53888583	2:53472257:A:T	Chr2	53472257	A	T	0.49053	0.216463	8.8469e-06
ENSBTAG00000009949	DARS1	Chr2	61390061	2:61379880:G:A	Chr2	61379880	G	A	0.232955	0.178316	7.29128e-05
ENSBTAG00000015172	MCM6	Chr2	61489618	2:61491991:CT:C	Chr2	61491991	CT	C	0.0852273	-0.251845	2.77772e-05
ENSBTAG00000015169	UBXN4	Chr2	61617901	2:61142891:T:G	Chr2	61142891	T	G	0.149621	0.330041	0.000753774
ENSBTAG00000026842	ZRANB3	Chr2	61831041	2:62495034:G:A	Chr2	62495034	G	A	0.0738636	-0.676602	0.0119661
ENSBTAG00000018744	MGAT5	Chr2	63181459	2:63002062:T:C	Chr2	63002062	T	C	0.291667	-0.347617	0.00758417
ENSBTAG00000005238	NCKAP5	Chr2	64157473	2:64536403:C:T	Chr2	64536403	C	T	0.123106	-0.335161	0.000433826
ENSBTAG00000005234	LYPD1	Chr2	64874977	2:64467968:T:TA	Chr2	64467968	T	TA	0.0852273	0.352416	0.000209231
ENSBTAG00000021103	SLC35F5	Chr2	65377141	2:65397780:G:A	Chr2	65397780	A	G	0.202652	0.17573	1.60169e-13
ENSBTAG00000003401	ACTR3	Chr2	65522495	2:65523099:G:A	Chr2	65523099	G	A	0.094697	-0.306391	0.0122726
ENSBTAG00000005235	DPP10	Chr2	67391410	2:67114904:GTTCATGT:G	Chr2	67114904	GTTCATGT	G	0.270833	-0.207727	0.00327255
ENSBTAG00000002112	INSIG2	Chr2	69756865	2:69774382:T:C	Chr2	69774382	T	C	0.244318	0.473799	5.88001e-15
ENSBTAG00000018473	MARCO	Chr2	70736153	2:69926194:G:T	Chr2	69926194	G	T	0.464015	0.153355	0.000406147
ENSBTAG00000010599	C2H2orf76	Chr2	71192356	2:71200516:T:TGCGGGGG	Chr2	71200516	TGCGGGGG	T	0.375954	-0.405311	5.82774e-07
ENSBTAG00000009517	DBI	Chr2	71192389	2:71200516:T:TGCGGGGG	Chr2	71200516	TGCGGGGG	T	0.375954	-0.224162	2.037e-15
ENSBTAG00000013619	SCTR	Chr2	71319376	2:71429636:G:T	Chr2	71429636	G	T	0.397727	-0.337796	0.000603928
ENSBTAG00000009058	TMEM177	Chr2	71480989	2:71478094:A:C	Chr2	71478094	A	C	0.409091	2.46717e-07	1.31925e-12
ENSBTAG00000014863	GYPC	Chr2	78885395	2:78957492:CA:C	Chr2	78957492	CA	C	0.310606	-0.264281	5.65708e-11
ENSBTAG00000007863	GLS	Chr2	79427773	2:80011889:A:C	Chr2	80011889	A	C	0.386364	-0.262202	0.000512173
ENSBTAG00000011256	MYO1B	Chr2	79795529	2:79801320:T:C	Chr2	79801320	C	T	0.261364	0.376035	1.92787e-05
ENSBTAG00000018653	NABP1	Chr2	80266322	2:80278665:C:T	Chr2	80278665	T	C	0.147727	-0.384483	0.00357529
ENSBTAG00000016784	DNAH7	Chr2	84632137	2:84530730:T:TA	Chr2	84530730	T	TA	0.462121	0.277484	0.0066512
ENSBTAG00000020696	HECW2	Chr2	85088822	2:84203565:G:A	Chr2	84203565	A	G	0.200758	0.387111	0.000114555
ENSBTAG00000002056	MARS2	Chr2	86189672	2:86414761:A:G	Chr2	86414761	G	A	0.246212	-0.48248	0.000138538
ENSBTAG00000031595	NA	Chr2	88474527	2:88418231:T:C	Chr2	88418231	T	C	0.13447	-0.389799	0.00514775
ENSBTAG00000019231	MAIP1	Chr2	88519696	2:88489403:T:C	Chr2	88489403	T	C	0.244318	0.382607	0.000126953
ENSBTAG00000016092	SPATS2L	Chr2	88832855	2:88589082:C:T	Chr2	88589082	C	T	0.261364	-0.268651	0.00589291
ENSBTAG00000002272	KCTD18	Chr2	89056404	2:89062246:C:T	Chr2	89062246	C	T	0.166667	-0.443229	5.5736e-05
ENSBTAG00000031579	SGO2	Chr2	89070546	2:89073492:CT:C	Chr2	89073492	CT	C	0.0568182	0.255279	2.74352e-10
ENSBTAG00000006049	BZW1	Chr2	89470524	2:89506399:T:C	Chr2	89506399	T	C	0.335227	-0.0902274	0.0136764
ENSBTAG00000005416	PPIL3	Chr2	89530269	2:89527147:A:G	Chr2	89527147	G	A	0.291667	-0.2664	1.44544e-05
ENSBTAG00000031473	ORC2	Chr2	89589796	2:89918511:T:C	Chr2	89918511	T	C	0.0625	-0.662105	0.00429387
ENSBTAG00000012760	NDUFB3	Chr2	89662428	2:89383241:T:A	Chr2	89383241	T	A	0.272727	0.302444	0.000186526
ENSBTAG00000010998	CFLAR	Chr2	89703846	2:89680247:CAAG:C	Chr2	89680247	CAAG	C	0.297348	-0.24104	0.00386452
ENSBTAG00000015718	CASP8	Chr2	89861142	2:90580415:G:A	Chr2	90580415	G	A	0.094697	-0.299197	0.0164968
ENSBTAG00000014933	TRAK2	Chr2	90008545	2:89924733:T:C	Chr2	89924733	C	T	0.435606	-3.0557e-08	2.3935e-07
ENSBTAG00000019298	STRADB	Chr2	90008659	2:89981353:T:C	Chr2	89981353	T	C	0.285985	0.456267	2.60046e-09
ENSBTAG00000007395	ALS2	Chr2	90296359	2:90425980:G:A	Chr2	90425980	G	A	0.450758	0.337028	4.26957e-07
ENSBTAG00000002283	FZD7	Chr2	90571271	2:90370800:A:G	Chr2	90370800	A	G	0.329545	-0.405006	1.30324e-05
ENSBTAG00000034192	KIAA2012	Chr2	90611067	2:90735865:T:C	Chr2	90735865	C	T	0.285985	-0.316549	7.72783e-05
ENSBTAG00000016000	CARF	Chr2	91242785	2:91237409:T:C	Chr2	91237409	C	T	0.234848	0.369065	0.00108001
ENSBTAG00000019994	NA	Chr2	91271660	2:90317458:G:A	Chr2	90317458	A	G	0.272727	-0.493286	0.0113983
ENSBTAG00000014469	NBEAL1	Chr2	91317092	2:91320658:G:A	Chr2	91320658	A	G	0.217803	0.245881	0.000565813
ENSBTAG00000000851	CYP20A1	Chr2	91483595	2:91385332:T:C	Chr2	91385332	C	T	0.195076	0.232951	0.00852241
ENSBTAG00000027201	RAPH1	Chr2	91750016	2:91749256:CT:C	Chr2	91749256	CT	C	0.185606	-0.268857	7.01154e-11
ENSBTAG00000007445	CD28	Chr2	91906147	2:91858807:C:T	Chr2	91858807	C	T	0.168561	-0.301453	5.66125e-07
ENSBTAG00000011971	NRP2	Chr2	94028626	2:94499573:T:C	Chr2	94499573	T	C	0.170455	-0.218599	0.00556726
ENSBTAG00000054879	NA	Chr2	94422134	2:94421866:T:C	Chr2	94421866	C	T	0.160985	-0.553915	0.00825712
ENSBTAG00000021979	EEF1B2	Chr2	94490095	2:94675518:C:G	Chr2	94675518	C	G	0.0549242	0.512717	3.20189e-06
ENSBTAG00000031166	ZDBF2	Chr2	94606161	2:93806732:G:T	Chr2	93806732	G	T	0.244318	-0.244743	0.00570067
ENSBTAG00000016193	FASTKD2	Chr2	95064721	2:95036403:A:G	Chr2	95036403	A	G	0.388258	0.260917	1.01017e-05
ENSBTAG00000052083	METTL21A	Chr2	95920426	2:95903478:T:C	Chr2	95903478	T	C	0.469697	-0.37634	4.53214e-07
ENSBTAG00000020527	IDH1	Chr2	96532002	2:96704371:G:C	Chr2	96704371	G	C	0.390152	-0.147646	0.00013927
ENSBTAG00000002177	PIKFYVE	Chr2	96557845	2:96817772:TAG:T	Chr2	96817772	TAG	T	0.314394	0.259991	0.0121276
ENSBTAG00000018130	MAP2	Chr2	97414230	2:98153713:A:T	Chr2	98153713	A	T	0.318182	-0.142713	2.26608e-06
ENSBTAG00000054647	RPE	Chr2	97826471	2:97845757:T:TA	Chr2	97845757	T	TA	0.189394	-0.245672	9.18647e-05
ENSBTAG00000010579	ACADL	Chr2	98029245	2:98282346:T:C	Chr2	98282346	T	C	0.441288	-0.381769	9.2542e-13
ENSBTAG00000015066	LANCL1	Chr2	98237653	2:98205448:G:A	Chr2	98205448	A	G	0.327652	0.169986	4.69514e-09
ENSBTAG00000016662	CPS1	Chr2	98327893	2:97887890:A:T	Chr2	97887890	A	T	0.359848	0.209359	5.25139e-05
ENSBTAG00000033690	BARD1	Chr2	102854286	2:102035607:G:A	Chr2	102035607	A	G	0.367424	0.187562	0.0197191
ENSBTAG00000019274	ATIC	Chr2	103327790	2:102940273:A:G	Chr2	102940273	A	G	0.0416667	0.154233	2.66629e-05
ENSBTAG00000013215	MREG	Chr2	104038722	2:105003067:C:T	Chr2	105003067	C	T	0.378788	-0.352218	7.29709e-05
ENSBTAG00000010413	TMEM169	Chr2	104067182	2:104090552:C:T	Chr2	104090552	C	T	0.460227	-0.49633	2.90465e-11
ENSBTAG00000006821	PECR	Chr2	104116082	2:104097492:T:C	Chr2	104097492	T	C	0.405303	1.4224e-07	0.00809723
ENSBTAG00000010426	XRCC5	Chr2	104134457	2:104101340:C:T	Chr2	104101340	C	T	0.429924	-0.20327	3.00922e-11
ENSBTAG00000003843	SMARCAL1	Chr2	104423002	2:104338330:G:A	Chr2	104338330	A	G	0.159091	0.101282	0.00358527
ENSBTAG00000010386	ARPC2	Chr2	106256622	2:106265276:AT:A	Chr2	106265276	AT	A	0.0909091	0.406712	2.83066e-05
ENSBTAG00000042880	NA	Chr2	106259879	2:106290305:C:T	Chr2	106290305	T	C	0.212121	0.548141	2.36506e-24
ENSBTAG00000003923	GPBAR1	Chr2	106290034	2:106830988:C:A	Chr2	106830988	C	A	0.0359848	-0.681972	4.09299e-07
ENSBTAG00000003935	TMBIM1	Chr2	106319619	2:106221332:G:A	Chr2	106221332	G	A	0.0965909	0.49484	0.0157659
ENSBTAG00000003807	CNOT9	Chr2	106532970	2:106533070:A:C	Chr2	106533070	A	C	0.0473485	0.493995	0.000102876
ENSBTAG00000003809	PLCD4	Chr2	106575925	2:105885440:G:A	Chr2	105885440	G	A	0.0909091	0.234405	0.00561632
ENSBTAG00000003819	STK36	Chr2	106633222	2:106756452:C:T	Chr2	106756452	C	T	0.0662879	0.644724	0.00444228
ENSBTAG00000031041	NHEJ1	Chr2	107112857	2:108054786:C:T	Chr2	108054786	C	T	0.482955	0.267769	0.0100367
ENSBTAG00000012618	SLC23A3	Chr2	107120309	2:107522259:A:C	Chr2	107522259	A	C	0.316288	0.354194	0.000558497
ENSBTAG00000020606	ZFAND2B	Chr2	107158436	2:107058156:G:C	Chr2	107058156	C	G	0.352273	0.190907	0.0112504
ENSBTAG00000020607	ABCB6	Chr2	107169762	2:107979799:A:G	Chr2	107979799	G	A	0.030303	-0.48724	0.000179212
ENSBTAG00000021514	DNPEP	Chr2	107321008	2:107445055:C:CT	Chr2	107445055	C	CT	0.030303	-0.901492	0.0139245
ENSBTAG00000020539	CHPF	Chr2	107472033	2:107058156:G:C	Chr2	107058156	C	G	0.352273	-0.199763	0.00494089
ENSBTAG00000017258	ACSL3	Chr2	111037665	2:110447604:GT:G	Chr2	110447604	G	GT	0.469697	0.162951	0.000465013
ENSBTAG00000008717	SERPINE2	Chr2	112158159	2:112249278:A:G	Chr2	112249278	A	G	0.147727	-0.420983	0.00342957
ENSBTAG00000021319	MFF	Chr2	115486533	2:115429811:TA:T	Chr2	115429811	T	TA	0.346591	-0.255858	1.99818e-09
ENSBTAG00000021323	AGFG1	Chr2	115629950	2:115673155:TA:T	Chr2	115673155	TA	T	0.280303	0.234506	3.47127e-11
ENSBTAG00000021325	SLC19A3	Chr2	115843935	2:115868192:C:A	Chr2	115868192	C	A	0.280303	-0.217409	2.48995e-15
ENSBTAG00000037640	PID1	Chr2	117290403	2:117281247:C:T	Chr2	117281247	T	C	0.246212	-0.457479	2.40446e-06
ENSBTAG00000016063	DNER	Chr2	117771065	2:117826068:T:C	Chr2	117826068	T	C	0.0909091	3.37924e-07	4.96948e-07
ENSBTAG00000021653	TRIP12	Chr2	117918447	2:117760295:G:A	Chr2	117760295	G	A	0.159091	-0.193481	0.00572162
ENSBTAG00000015752	SP110	Chr2	118232898	2:118235835:G:A	Chr2	118235835	G	A	0.113636	-0.353794	0.000427581
ENSBTAG00000009664	NA	Chr2	118237532	2:118269727:C:T	Chr2	118269727	C	T	0.032197	-0.448616	0.00915781
ENSBTAG00000037702	SP140L	Chr2	118362311	2:117982208:T:C	Chr2	117982208	T	C	0.104167	-0.510244	0.00376267
ENSBTAG00000040055	CAB39	Chr2	118530389	2:118691997:A:G	Chr2	118691997	A	G	0.242424	0.294639	5.75899e-05
ENSBTAG00000017855	ITM2C	Chr2	118666035	2:118681194:T:G	Chr2	118681194	T	G	0.0757576	-0.212703	0.0182462
ENSBTAG00000054626	NA	Chr2	118831063	2:118850846:T:C	Chr2	118850846	T	C	0.257576	-0.382386	4.88308e-06
ENSBTAG00000026710	C2H2orf72	Chr2	118846916	2:118539558:A:G	Chr2	118539558	A	G	0.361742	0.289718	5.55193e-06
ENSBTAG00000018502	ARMC9	Chr2	118967306	2:119005482:C:T	Chr2	119005482	C	T	0.42803	-0.453349	0.000800954
ENSBTAG00000001359	B3GNT7	Chr2	119174754	2:119197773:C:CTT	Chr2	119197773	CTT	C	0.151515	0.860195	6.17044e-13
ENSBTAG00000051671	NA	Chr2	119407679	2:119405469:G:A	Chr2	119405469	A	G	0.291667	-0.428966	3.05029e-05
ENSBTAG00000002549	PTMA	Chr2	119414108	2:119445915:C:T	Chr2	119445915	T	C	0.276515	0.276897	8.81065e-06
ENSBTAG00000011964	DIS3L2	Chr2	119630439	2:118700999:TCA:T	Chr2	118700999	T	TCA	0.357955	0.172002	0.016566
ENSBTAG00000021050	ECEL1	Chr2	120125755	2:120093971:G:T	Chr2	120093971	G	T	0.168561	0.275634	3.05707e-10
ENSBTAG00000010598	EIF4E2	Chr2	120187398	2:120081365:T:C	Chr2	120081365	T	C	0.121212	-0.563165	1.1926e-07
ENSBTAG00000012629	ZNF362	Chr2	120436409	2:119555318:A:C	Chr2	119555318	A	C	0.386364	-0.230242	0.0140306
ENSBTAG00000017605	AK2	Chr2	120653449	2:120277055:G:T	Chr2	120277055	G	T	0.0265152	0.314508	0.0095692
ENSBTAG00000018067	S100PBP	Chr2	120849384	2:121766194:A:T	Chr2	121766194	A	T	0.0871212	-0.39484	1.41557e-05
ENSBTAG00000018062	KIAA1522	Chr2	120910058	2:120889786:C:T	Chr2	120889786	C	T	0.270833	0.208069	0.00180438
ENSBTAG00000020655	BSDC1	Chr2	121176082	2:121157556:T:C	Chr2	121157556	C	T	0.392045	0.239467	5.51247e-08
ENSBTAG00000014390	MTMR9	Chr2	121291041	2:121312221:CA:C	Chr2	121312221	CA	C	0.275665	0.128941	5.53826e-05
ENSBTAG00000009163	TMEM234	Chr2	121306085	2:121320387:A:C	Chr2	121320387	C	A	0.308712	0.217364	0.000154475
ENSBTAG00000014388	EIF3I	Chr2	121306107	2:121312221:CA:C	Chr2	121312221	CA	C	0.275665	0.169428	2.08673e-09
ENSBTAG00000015104	CCDC28B	Chr2	121324082	2:121290138:T:A	Chr2	121290138	A	T	0.257576	-0.453939	0.0114241
ENSBTAG00000019486	CLDN12	Chr2	121402134	2:121751266:C:T	Chr2	121751266	C	T	0.119318	-0.698924	0.0179393
ENSBTAG00000010378	PEF1	Chr2	122077522	2:122060881:C:T	Chr2	122060881	C	T	0.36553	0.175699	4.14851e-05
ENSBTAG00000013235	TINAGL1	Chr2	122178659	2:121944309:G:T	Chr2	121944309	G	T	0.253788	-0.2703	0.00391452
ENSBTAG00000035081	SERINC2	Chr2	122259028	2:122213716:T:C	Chr2	122213716	C	T	0.481061	-0.133967	0.00135443
ENSBTAG00000016818	ZCCHC17	Chr2	122347439	2:122322001:C:G	Chr2	122322001	G	C	0.337121	-0.482487	3.12322e-07
ENSBTAG00000012848	PTPRU	Chr2	124325673	2:123628240:G:A	Chr2	123628240	G	A	0.113636	0.454982	0.00652181
ENSBTAG00000006667	EPB41	Chr2	124610867	2:124603403:AAAGG:A	Chr2	124603403	AAAGG	A	0.287879	0.16978	0.00936604
ENSBTAG00000050344	SNORA73	Chr2	124916672	2:125181042:GA:G	Chr2	125181042	GA	G	0.0208333	0.56981	0.0101065
ENSBTAG00000002678	MED18	Chr2	125074216	2:125812939:A:G	Chr2	125812939	G	A	0.44697	0.434788	0.00017108
ENSBTAG00000006342	ATP5IF1	Chr2	125147786	2:125147507:A:G	Chr2	125147507	G	A	0.431818	0.163662	3.73857e-05
ENSBTAG00000027051	PTAFR	Chr2	125201952	2:125251601:T:C	Chr2	125251601	T	C	0.3125	0.228669	0.00198211
ENSBTAG00000043989	EYA3	Chr2	125249518	2:125382384:T:C	Chr2	125382384	T	C	0.496212	0.13426	0.000164967
ENSBTAG00000008800	XKR8	Chr2	125400258	2:125400387:A:G	Chr2	125400387	A	G	0.113636	0.429423	0.0017366
ENSBTAG00000012997	SMPDL3B	Chr2	125432986	2:125403041:A:T	Chr2	125403041	T	A	0.401515	-0.36249	2.25858e-17
ENSBTAG00000001192	STX12	Chr2	125585869	2:125558013:T:C	Chr2	125558013	T	C	0.170455	4.23251e-08	1.14374e-06
ENSBTAG00000010254	MAP3K6	Chr2	125921163	2:125928618:T:A	Chr2	125928618	T	A	0.0776515	-0.664555	2.20654e-07
ENSBTAG00000053588	WDTC1	Chr2	126036698	2:126033728:T:TA	Chr2	126033728	T	TA	0.458333	-0.19378	0.00063135
ENSBTAG00000009796	PIGV	Chr2	126402241	2:126402189:C:T	Chr2	126402189	T	C	0.4375	0.267425	1.43657e-21
ENSBTAG00000009581	UBXN11	Chr2	126814238	2:126735663:T:A	Chr2	126735663	A	T	0.367424	0.392027	0.0154623
ENSBTAG00000009580	SH3BGRL3	Chr2	126839005	2:126654159:T:C	Chr2	126654159	C	T	0.191288	0.266968	0.0171816
ENSBTAG00000001513	PDIK1L	Chr2	126975053	2:127112749:C:T	Chr2	127112749	C	T	0.274621	-0.381774	0.0196882
ENSBTAG00000005105	PAFAH2	Chr2	127089779	2:127321340:G:A	Chr2	127321340	G	A	0.388258	-0.209718	7.85552e-06
ENSBTAG00000001050	LDLRAP1	Chr2	127508799	2:127489175:G:A	Chr2	127489175	G	A	0.285985	-0.307244	1.35878e-09
ENSBTAG00000012604	NCMAP	Chr2	128334929	2:128332205:G:T	Chr2	128332205	G	T	0.198864	0.358122	1.08882e-08
ENSBTAG00000017452	RCAN3	Chr2	128422500	2:128868145:G:A	Chr2	128868145	A	G	0.475379	0.306729	0.0128907
ENSBTAG00000013048	NIPAL3	Chr2	128496459	2:128499004:T:C	Chr2	128499004	C	T	0.395833	-0.425669	1.85234e-16
ENSBTAG00000030435	PNRC2	Chr2	128942609	2:128252884:G:A	Chr2	128252884	G	A	0.248106	-0.138965	0.0182151
ENSBTAG00000019371	CNR2	Chr2	129001538	2:128985104:C:G	Chr2	128985104	C	G	0.373106	-0.20681	4.78231e-12
ENSBTAG00000030434	FUCA1	Chr2	129056429	2:129068395:C:T	Chr2	129068395	T	C	0.352273	0.286418	4.8398e-06
ENSBTAG00000021832	HMGCL	Chr2	129091482	2:129072102:G:A	Chr2	129072102	G	A	0.429924	-0.258448	8.53267e-06
ENSBTAG00000021620	PITHD1	Chr2	129130667	2:129128605:A:G	Chr2	129128605	G	A	0.38447	0.268617	0.000141168
ENSBTAG00000026585	ELOA	Chr2	129156032	2:129047704:C:CT	Chr2	129047704	CT	C	0.342308	-0.251994	0.0103243
ENSBTAG00000012263	ASAP3	Chr2	129367153	2:130012314:T:C	Chr2	130012314	T	C	0.0568182	-0.575287	0.00154403
ENSBTAG00000038865	TCEA3	Chr2	129421762	2:129835701:G:A	Chr2	129835701	A	G	0.289773	0.336355	2.46357e-08
ENSBTAG00000008951	ALPL	Chr2	131245100	2:132077017:C:T	Chr2	132077017	T	C	0.0378788	-0.455202	2.38889e-08
ENSBTAG00000002977	ECE1	Chr2	131324609	2:131439403:G:T	Chr2	131439403	T	G	0.484848	0.172915	0.00134716
ENSBTAG00000040215	EIF4G3	Chr2	131485409	2:131407812:G:A	Chr2	131407812	G	A	0.251894	-0.210781	3.50289e-05
ENSBTAG00000006085	DDOST	Chr2	131971820	2:131973479:A:G	Chr2	131973479	A	G	0.361742	-0.10046	1.12779e-10
ENSBTAG00000006084	PINK1	Chr2	132006686	2:131971948:C:T	Chr2	131971948	T	C	0.204545	0.513383	3.79791e-20
ENSBTAG00000052516	CDA	Chr2	132042156	2:132420004:C:T	Chr2	132420004	C	T	0.253788	-0.410511	2.0306e-12
ENSBTAG00000020850	MUL1	Chr2	132115902	2:132140469:A:T	Chr2	132140469	A	T	0.460227	0.367343	0.000409955
ENSBTAG00000046977	PLA2G2D4	Chr2	132534611	2:132788826:G:A	Chr2	132788826	G	A	0.467803	8.49066e-08	1.70098e-09
ENSBTAG00000020499	NA	Chr2	132561690	2:132341326:G:GC	Chr2	132341326	G	GC	0.0265152	1.17137	1.80987e-05
ENSBTAG00000050719	PLA2G2D1	Chr2	132596219	2:133149583:C:A	Chr2	133149583	A	C	0.232955	0.265482	2.10955e-06
ENSBTAG00000017108	OTUD3	Chr2	132831792	2:132829471:A:G	Chr2	132829471	A	G	0.162879	0.295072	0.000466108
ENSBTAG00000030367	RNF186	Chr2	132887312	2:132868373:G:C	Chr2	132868373	G	C	0.297348	-0.270277	0.00871158
ENSBTAG00000007998	TMCO4	Chr2	132915933	2:132917176:A:G	Chr2	132917176	G	A	0.498024	0.251714	1.07478e-09
ENSBTAG00000005140	NA	Chr2	133056409	2:133157155:A:G	Chr2	133157155	A	G	0.0814394	0.698048	0.000179147
ENSBTAG00000050219	NA	Chr2	133110076	2:132863189:C:T	Chr2	132863189	C	T	0.0914397	0.638745	4.52238e-06
ENSBTAG00000012289	AKR7A2	Chr2	133363650	2:133348428:T:TG	Chr2	133348428	T	TG	0.111742	0.295766	0.000812631
ENSBTAG00000026758	NA	Chr2	133397275	2:133445420:C:A	Chr2	133445420	A	C	0.443182	0.168025	0.000106492
ENSBTAG00000011950	EMC1	Chr2	133406872	2:134332867:C:CT	Chr2	134332867	C	CT	0.276515	0.29243	3.30189e-06
ENSBTAG00000011951	MRTO4	Chr2	133411304	2:133297374:G:T	Chr2	133297374	T	G	0.350379	0.208015	0.00508119
ENSBTAG00000030335	ALDH4A1	Chr2	133756950	2:134121494:A:G	Chr2	134121494	A	G	0.481061	-0.209828	5.0711e-05
ENSBTAG00000030322	KLHDC7A	Chr2	134190663	2:134091311:C:G	Chr2	134091311	C	G	0.314394	-0.295275	0.000973456
ENSBTAG00000000684	ARHGEF10L	Chr2	135154958	2:135092380:TG:T	Chr2	135092380	TG	T	0.458175	-0.488181	6.41824e-16
ENSBTAG00000008579	RCC2	Chr2	135211440	2:134656822:A:G	Chr2	134656822	A	G	0.327652	0.24854	0.0118798
ENSBTAG00000008314	SDHB	Chr2	135548908	2:135556155:TCTTAATCAGTCAGTTGCTGGGGCTAGGGAGAGGGCGCTGACTGCAGAGAAGCACTCGAGAGCTTC:T	Chr2	135556155	TCTTAATCAGTCAGTTGCTGGGGCTAGGGAGAGGGCGCTGACTGCAGAGAAGCACTCGAGAGCTTC	T	0.155303	0.245836	3.9478e-10
ENSBTAG00000008309	ATP13A2	Chr2	135586323	2:135590089:TCACACG:T	Chr2	135590089	TCACACG	T	0.246212	0.338221	7.79716e-06
ENSBTAG00000003832	MFAP2	Chr2	135611508	2:135609539:C:T	Chr2	135609539	C	T	0.255682	0.538068	0.000240604
ENSBTAG00000003822	CROCC	Chr2	135668617	2:135806480:C:T	Chr2	135806480	T	C	0.166667	0.448942	3.58286e-08
ENSBTAG00000013282	NECAP2	Chr2	135688455	2:135675489:C:T	Chr2	135675489	T	C	0.4375	0.571618	2.10946e-20
ENSBTAG00000008510	FBXO42	Chr2	135783523	2:135788758:A:G	Chr2	135788758	G	A	0.479167	-0.298202	2.74935e-06
ENSBTAG00000005670	ARHGEF19	Chr2	135893248	2:135908328:G:A	Chr2	135908328	G	A	0.100379	0.169442	0.000474664
ENSBTAG00000037819	SFT2D2	Chr3	330047	3:950728:C:A	Chr3	950728	A	C	0.422348	0.372696	0.00094527
ENSBTAG00000020969	DCAF6	Chr3	752300	3:853159:A:G	Chr3	853159	G	A	0.231061	-0.319114	1.23787e-05
ENSBTAG00000020968	MPC2	Chr3	752399	3:642595:G:T	Chr3	642595	G	T	0.486742	-0.176912	1.04968e-05
ENSBTAG00000001052	ADCY10	Chr3	809357	3:857011:G:C	Chr3	857011	G	C	0.106061	-0.309108	0.000914486
ENSBTAG00000002823	MPZL1	Chr3	997233	3:934188:G:A	Chr3	934188	G	A	0.477273	-0.163274	7.17225e-09
ENSBTAG00000008931	CREG1	Chr3	1148817	3:1148846:C:T	Chr3	1148846	T	C	0.469697	-0.411145	3.21925e-12
ENSBTAG00000010456	TADA1	Chr3	2034405	3:2674270:T:TAGCAGC	Chr3	2674270	T	TAGCAGC	0.348485	-0.582703	4.08889e-09
ENSBTAG00000010775	POGK	Chr3	2069922	3:2069850:T:C	Chr3	2069850	T	C	0.25947	0.396027	1.40259e-19
ENSBTAG00000017852	ALDH9A1	Chr3	3220578	3:3223840:A:G	Chr3	3223840	G	A	0.350379	0.322038	9.40548e-09
ENSBTAG00000010265	MGST3	Chr3	3288716	3:2426559:T:C	Chr3	2426559	C	T	0.1875	-0.199825	9.89754e-05
ENSBTAG00000013801	PBX1	Chr3	4246502	3:4428631:G:A	Chr3	4428631	A	G	0.354167	-0.286162	0.00318726
ENSBTAG00000007247	NUF2	Chr3	5998691	3:6921279:A:G	Chr3	6921279	A	G	0.0511364	-0.279848	0.00474602
ENSBTAG00000016341	RGS5	Chr3	6159080	3:6112789:T:C	Chr3	6112789	T	C	0.339015	-0.466705	2.26589e-07
ENSBTAG00000005976	HSD17B7	Chr3	6664654	3:6795916:T:C	Chr3	6795916	C	T	0.172348	0.459526	1.38973e-09
ENSBTAG00000004885	DDR2	Chr3	6853843	3:6785877:T:A	Chr3	6785877	T	A	0.13447	0.353131	0.00136771
ENSBTAG00000010206	UAP1	Chr3	6938634	3:7137965:G:A	Chr3	7137965	G	A	0.257576	0.375258	1.08531e-10
ENSBTAG00000012694	UHMK1	Chr3	7000320	3:6975704:G:C	Chr3	6975704	C	G	0.323864	-0.200872	0.0048011
ENSBTAG00000021754	DUSP12	Chr3	7861112	3:7860587:C:T	Chr3	7860587	T	C	0.293561	0.308986	2.72859e-09
ENSBTAG00000039035	HSPA6	Chr3	8034120	3:8515138:G:A	Chr3	8515138	G	A	0.293561	-0.392024	0.00161856
ENSBTAG00000038124	FCGR2A	Chr3	8044343	3:8073921:C:A	Chr3	8073921	A	C	0.475379	-0.442481	0.00227715
ENSBTAG00000015853	SDHC	Chr3	8208058	3:8186958:A:C	Chr3	8186958	C	A	0.251894	0.331906	1.04374e-12
ENSBTAG00000009215	NR1I3	Chr3	8271661	3:7501111:CT:C	Chr3	7501111	C	CT	0.393939	0.0838196	0.000448076
ENSBTAG00000024503	FCER1G	Chr3	8290169	3:8284851:C:T	Chr3	8284851	C	T	0.342803	0.193563	0.000653446
ENSBTAG00000017875	ARHGAP30	Chr3	8420192	3:8427004:C:T	Chr3	8427004	C	T	0.143939	0.289954	0.00303057
ENSBTAG00000017856	TSTD1	Chr3	8442911	3:8442497:T:TG	Chr3	8442497	T	TG	0.142045	0.916121	2.05683e-19
ENSBTAG00000002947	LY9	Chr3	8788290	3:8788160:T:C	Chr3	8788160	C	T	0.242424	0.472014	4.94176e-18
ENSBTAG00000019033	CD84	Chr3	9076734	3:9198636:A:AGT	Chr3	9198636	A	AGT	0.253788	-0.481534	0.00308175
ENSBTAG00000014368	SLAMF6	Chr3	9152845	3:9058997:GT:G	Chr3	9058997	GT	G	0.350379	0.429574	5.05238e-06
ENSBTAG00000004334	NCSTN	Chr3	9350657	3:10159327:C:T	Chr3	10159327	C	T	0.106061	-0.279726	0.013728
ENSBTAG00000007537	PEX19	Chr3	9399900	3:9327402:C:A	Chr3	9327402	C	A	0.0359848	-0.649116	2.43437e-05
ENSBTAG00000009982	IGSF8	Chr3	9577153	3:10378227:T:C	Chr3	10378227	C	T	0.200758	0.258299	0.00896548
ENSBTAG00000002419	PIGM	Chr3	9644361	3:9630132:C:T	Chr3	9630132	T	C	0.458333	-0.896523	5.7008e-24
ENSBTAG00000002068	TAGLN2	Chr3	9761199	3:9838978:C:T	Chr3	9838978	T	C	0.210227	0.1456	0.0162765
ENSBTAG00000013907	CRP	Chr3	9983502	3:9815640:A:G	Chr3	9815640	A	G	0.162879	-0.370248	4.21345e-10
ENSBTAG00000019616	APCS	Chr3	10129290	3:10125544:C:G	Chr3	10125544	C	G	0.443182	-5.78886e-07	1.65733e-22
ENSBTAG00000039366	NA	Chr3	11422750	3:11845841:C:CA	Chr3	11845841	C	CA	0.36692	-0.384224	0.00033553
ENSBTAG00000009421	CD1E	Chr3	11610099	3:12320836:C:T	Chr3	12320836	C	T	0.318182	-0.434116	0.000327883
ENSBTAG00000022893	NA	Chr3	11749447	3:11803298:G:C	Chr3	11803298	C	G	0.494318	0.371018	0.0191785
ENSBTAG00000039993	CD1D	Chr3	11919678	3:11888468:G:GCA	Chr3	11888468	G	GCA	0.147727	0.360155	9.79493e-12
ENSBTAG00000024960	NA	Chr3	12154133	3:12643847:A:G	Chr3	12643847	A	G	0.117424	-0.429739	8.77105e-09
ENSBTAG00000053343	NA	Chr3	12253817	3:11905147:T:C	Chr3	11905147	T	C	0.25	-0.324846	0.000993321
ENSBTAG00000022514	CD5L	Chr3	12508922	3:12497331:T:A	Chr3	12497331	T	A	0.13447	-0.170352	6.66602e-07
ENSBTAG00000053777	NA	Chr3	12531189	3:13309949:A:G	Chr3	13309949	A	G	0.0852273	-0.438544	0.00657149
ENSBTAG00000005891	FCRL1	Chr3	12577542	3:12402890:C:T	Chr3	12402890	C	T	0.435606	0.361155	6.40945e-15
ENSBTAG00000000964	FCRL5	Chr3	12804192	3:12864401:T:C	Chr3	12864401	C	T	0.357955	0.387519	3.54868e-11
ENSBTAG00000053098	NA	Chr3	12991375	3:12958902:C:A	Chr3	12958902	A	C	0.212121	-5.6278e-07	2.93213e-12
ENSBTAG00000052866	NA	Chr3	13068048	3:12533702:TC:T	Chr3	12533702	TC	T	0.314394	-0.260985	1.22506e-08
ENSBTAG00000012361	ARHGEF11	Chr3	13871482	3:13865840:T:C	Chr3	13865840	C	T	0.204545	-0.304179	4.18665e-12
ENSBTAG00000000404	NAXE	Chr3	14244262	3:14240713:C:G	Chr3	14240713	G	C	0.426136	0.27692	1.58926e-08
ENSBTAG00000006370	CCT3	Chr3	14486487	3:14084698:G:A	Chr3	14084698	G	A	0.234848	0.291929	0.00682349
ENSBTAG00000009432	PMF1	Chr3	14575605	3:13623634:C:T	Chr3	13623634	C	T	0.327652	0.338687	4.80578e-05
ENSBTAG00000012228	SEMA4A	Chr3	14627449	3:13669138:G:GATAT	Chr3	13669138	G	GATAT	0.397727	0.291701	0.0162399
ENSBTAG00000017574	LMNA	Chr3	14670926	3:14041009:G:A	Chr3	14041009	G	A	0.0681818	-0.338109	0.000863545
ENSBTAG00000001212	SSR2	Chr3	14754111	3:14773502:CA:C	Chr3	14773502	C	CA	0.176136	0.261641	4.73354e-05
ENSBTAG00000000105	RIT1	Chr3	14853320	3:15307119:A:AG	Chr3	15307119	AG	A	0.433206	0.236495	0.00335997
ENSBTAG00000020356	GON4L	Chr3	14893063	3:14944206:T:G	Chr3	14944206	T	G	0.138258	-0.313475	3.88916e-12
ENSBTAG00000045596	NA	Chr3	14913466	3:14923774:G:GTTT	Chr3	14923774	G	GTTT	0.125	-0.248575	7.8593e-10
ENSBTAG00000011209	SYT11	Chr3	14949656	3:14904687:G:A	Chr3	14904687	G	A	0.125	0.411018	4.70271e-05
ENSBTAG00000026613	MSTO1	Chr3	15042707	3:15316895:A:G	Chr3	15316895	G	A	0.378788	0.518056	3.31633e-06
ENSBTAG00000054061	RUSC1	Chr3	15310732	3:14912650:T:C	Chr3	14912650	C	T	0.458333	0.253903	0.001302
ENSBTAG00000017056	PKLR	Chr3	15344676	3:15356245:C:T	Chr3	15356245	T	C	0.371212	-2.02523e-07	2.16781e-14
ENSBTAG00000014841	GBA	Chr3	15390178	3:15392906:A:AG	Chr3	15392906	AG	A	0.373106	0.626669	3.90036e-15
ENSBTAG00000003083	SLC50A1	Chr3	15465501	3:15453397:C:T	Chr3	15453397	T	C	0.388258	0.428896	1.3388e-13
ENSBTAG00000020244	EFNA1	Chr3	15473164	3:15341270:G:A	Chr3	15341270	A	G	0.482955	-0.264033	0.0119846
ENSBTAG00000010663	ADAM15	Chr3	15548475	3:15549382:G:A	Chr3	15549382	A	G	0.397338	-0.403605	2.86937e-05
ENSBTAG00000000186	FLAD1	Chr3	15609853	3:15557508:G:A	Chr3	15557508	G	A	0.104167	-0.654867	2.48011e-13
ENSBTAG00000004552	PBXIP1	Chr3	15627233	3:15652375:C:T	Chr3	15652375	C	T	0.195076	-0.508247	9.7239e-10
ENSBTAG00000017819	PMVK	Chr3	15659640	3:15659384:T:G	Chr3	15659384	T	G	0.212121	0.643486	6.91312e-16
ENSBTAG00000018249	KCNN3	Chr3	15725420	3:15892721:G:T	Chr3	15892721	G	T	0.284091	-0.303397	0.0145565
ENSBTAG00000011881	TDRD10	Chr3	16081469	3:16070707:C:T	Chr3	16070707	T	C	0.450758	-0.438749	4.43608e-25
ENSBTAG00000020542	SHE	Chr3	16086188	3:16086240:G:A	Chr3	16086240	A	G	0.454373	-0.424984	3.32092e-25
ENSBTAG00000018474	IL6R	Chr3	16173990	3:16132031:C:T	Chr3	16132031	T	C	0.479167	-0.170406	1.01935e-09
ENSBTAG00000004271	UBAP2L	Chr3	16300420	3:16144171:C:T	Chr3	16144171	C	T	0.157197	-0.210044	0.0174192
ENSBTAG00000020026	C3H1orf43	Chr3	16300764	3:16298506:A:G	Chr3	16298506	G	A	0.0776515	0.272171	4.45365e-08
ENSBTAG00000033217	TPM3	Chr3	16318633	3:16381003:T:A	Chr3	16381003	T	A	0.333333	0.211716	1.15466e-05
ENSBTAG00000006234	NPR1	Chr3	16700685	3:16711132:T:C	Chr3	16711132	T	C	0.195076	-0.33698	7.04964e-07
ENSBTAG00000021377	S100A14	Chr3	16766543	3:16987241:A:G	Chr3	16987241	A	G	0.0227273	0.664369	0.00163021
ENSBTAG00000014204	S100A16	Chr3	16769717	3:16822966:C:A	Chr3	16822966	C	A	0.0284091	0.401992	1.41032e-06
ENSBTAG00000037651	S100A2	Chr3	16805482	3:16822966:C:A	Chr3	16822966	C	A	0.0284091	-0.32242	0.0114105
ENSBTAG00000015145	S100A11	Chr3	18727499	3:18728599:G:A	Chr3	18728599	G	A	0.399621	-0.301072	3.85335e-05
ENSBTAG00000015147	S100A10	Chr3	18762473	3:18783051:G:T	Chr3	18783051	T	G	0.166667	-0.41134	3.45863e-06
ENSBTAG00000004772	THEM4	Chr3	18844274	3:18839695:G:GCAA	Chr3	18839695	G	GCAA	0.168561	-0.834102	6.51035e-12
ENSBTAG00000001942	SNX27	Chr3	19166836	3:19078137:T:C	Chr3	19078137	T	C	0.253788	0.292808	0.0103753
ENSBTAG00000017566	TUFT1	Chr3	19250840	3:19250573:A:G	Chr3	19250573	A	G	0.414773	0.594122	5.75397e-13
ENSBTAG00000008091	SELENBP1	Chr3	19442662	3:19376069:CAG:C	Chr3	19376069	CAG	C	0.42803	0.195125	3.19156e-07
ENSBTAG00000006099	PIP5K1A	Chr3	19611272	3:19002739:G:GTA	Chr3	19002739	G	GTA	0.285985	-0.347521	0.00690805
ENSBTAG00000015336	PRUNE1	Chr3	19764785	3:20588513:A:G	Chr3	20588513	A	G	0.280303	0.22903	0.0153634
ENSBTAG00000015329	MINDY1	Chr3	19766327	3:19962163:T:C	Chr3	19962163	T	C	0.030303	0.723004	0.0126363
ENSBTAG00000015304	ANXA9	Chr3	19786734	3:19717178:T:C	Chr3	19717178	C	T	0.223485	-5.31649e-08	1.15492e-05
ENSBTAG00000000098	SETDB1	Chr3	19834258	3:19945943:AT:A	Chr3	19945943	A	AT	0.30303	-0.253171	0.00775184
ENSBTAG00000024378	MRPS21	Chr3	20351092	3:20474728:T:C	Chr3	20474728	T	C	0.0625	-0.564017	0.003123
ENSBTAG00000004852	PLEKHO1	Chr3	20485097	3:19509320:G:A	Chr3	19509320	G	A	0.113636	0.544191	0.00156347
ENSBTAG00000012496	MTMR11	Chr3	20672619	3:20729859:T:TC	Chr3	20729859	TC	T	0.4375	0.277755	0.0133469
ENSBTAG00000001599	SV2A	Chr3	20696427	3:20696698:AAT:A	Chr3	20696698	A	AAT	0.450758	0.434451	4.17192e-05
ENSBTAG00000050122	NA	Chr3	20724733	3:20649483:T:A	Chr3	20649483	A	T	0.401515	0.291819	0.00332009
ENSBTAG00000008592	FCGR1A	Chr3	20811180	3:20712854:G:C	Chr3	20712854	C	G	0.102273	-0.293739	0.00557442
ENSBTAG00000008372	PEX11B	Chr3	21454071	3:21382933:A:G	Chr3	21382933	A	G	0.443182	0.390747	3.50204e-08
ENSBTAG00000008373	ITGA10	Chr3	21460549	3:21490935:G:GT	Chr3	21490935	G	GT	0.0738636	0.472114	0.00210972
ENSBTAG00000021635	NUDT17	Chr3	21517734	3:21417153:A:AT	Chr3	21417153	A	AT	0.405303	-0.263246	0.00391999
ENSBTAG00000021637	POLR3C	Chr3	21532978	3:21532428:G:A	Chr3	21532428	A	G	0.253788	-0.314782	2.83308e-05
ENSBTAG00000005810	PDZK1	Chr3	21684182	3:21686520:G:A	Chr3	21686520	A	G	0.429119	0.127266	2.4846e-14
ENSBTAG00000020831	CHD1L	Chr3	22446397	3:22423338:A:G	Chr3	22423338	A	G	0.314394	0.215174	2.25125e-06
ENSBTAG00000014387	PRKAB2	Chr3	22528349	3:22238235:C:T	Chr3	22238235	C	T	0.388258	0.29236	0.0194437
ENSBTAG00000001564	PDE4DIP	Chr3	23031334	3:22883346:C:T	Chr3	22883346	C	T	0.439394	0.574893	1.11416e-10
ENSBTAG00000007909	NOTCH2	Chr3	23163505	3:22924315:C:T	Chr3	22924315	T	C	0.460227	0.117039	0.000636428
ENSBTAG00000003898	HMGCS2	Chr3	23536512	3:23552766:G:A	Chr3	23552766	A	G	0.160985	2.12665e-07	1.54344e-08
ENSBTAG00000039719	PHGDH	Chr3	23596466	3:23567945:A:T	Chr3	23567945	T	A	0.219697	0.141584	1.24751e-07
ENSBTAG00000006769	HSD3B1	Chr3	23717051	3:23718155:C:T	Chr3	23718155	C	T	0.102273	0.433691	5.25517e-09
ENSBTAG00000000123	HAO2	Chr3	23763956	3:23931927:C:T	Chr3	23931927	C	T	0.0473485	-0.354125	0.000831707
ENSBTAG00000003586	MAN1A2	Chr3	25856341	3:25875547:CCTT:C	Chr3	25875547	CCTT	C	0.102273	0.541371	1.59469e-05
ENSBTAG00000001748	TRIM45	Chr3	26099796	3:26100916:C:T	Chr3	26100916	C	T	0.44697	0.543993	2.36554e-07
ENSBTAG00000015392	TTF2	Chr3	26179583	3:25477054:T:G	Chr3	25477054	T	G	0.465909	0.261087	0.00778576
ENSBTAG00000008022	PTGFRN	Chr3	26331248	3:25494072:G:A	Chr3	25494072	G	A	0.231061	-2.3624e-07	0.000471693
ENSBTAG00000004849	IGSF3	Chr3	26574399	3:26584089:T:TGG	Chr3	26584089	T	TGG	0.335227	-0.368598	8.12283e-10
ENSBTAG00000040131	CD58	Chr3	26709590	3:26763241:C:T	Chr3	26763241	C	T	0.157197	0.20911	0.000562648
ENSBTAG00000001406	MAB21L3	Chr3	27208154	3:27207707:G:A	Chr3	27207707	G	A	0.0246212	1.2785	2.71651e-10
ENSBTAG00000000664	SLC22A15	Chr3	27363147	3:27379341:AT:A	Chr3	27379341	AT	A	0.498106	0.477642	4.83049e-21
ENSBTAG00000005788	VANGL1	Chr3	27677204	3:27036906:C:T	Chr3	27036906	C	T	0.393939	-0.232977	0.00947225
ENSBTAG00000015977	SIKE1	Chr3	28556519	3:29159497:TAGAG:T	Chr3	29159497	T	TAGAG	0.102273	0.543046	0.0159506
ENSBTAG00000046797	NRAS	Chr3	28614966	3:27632422:A:AAACAC	Chr3	27632422	A	AAACAC	0.0909091	0.222937	0.00774658
ENSBTAG00000012194	DENND2C	Chr3	28661324	3:29100722:A:C	Chr3	29100722	A	C	0.0662879	0.548681	7.64077e-06
ENSBTAG00000001499	TRIM33	Chr3	28837853	3:28832682:C:T	Chr3	28832682	C	T	0.212121	0.357509	0.0018075
ENSBTAG00000055125	NA	Chr3	29190783	3:29217852:T:C	Chr3	29217852	T	C	0.285985	-0.454305	0.00118823
ENSBTAG00000019615	PHTF1	Chr3	29624991	3:29169683:G:A	Chr3	29169683	G	A	0.168561	0.552061	4.87901e-07
ENSBTAG00000008525	LRIG2	Chr3	30272272	3:30364787:C:T	Chr3	30364787	C	T	0.414773	0.170253	0.00279004
ENSBTAG00000015107	SLC16A1	Chr3	30382286	3:29482696:T:A	Chr3	29482696	T	A	0.0814394	-0.208307	0.00258623
ENSBTAG00000049434	NA	Chr3	30515496	3:30512365:G:A	Chr3	30512365	A	G	0.450758	-0.26307	3.87254e-07
ENSBTAG00000052841	TAFA3	Chr3	30603478	3:30520461:G:A	Chr3	30520461	G	A	0.138258	0.257503	0.000758897
ENSBTAG00000014299	RHOC	Chr3	30617924	3:30703111:G:A	Chr3	30703111	G	A	0.327652	0.318866	0.0111178
ENSBTAG00000014295	CAPZA1	Chr3	30701981	3:30463400:G:A	Chr3	30463400	A	G	0.0833333	-0.279877	2.1977e-05
ENSBTAG00000014294	ST7L	Chr3	30702704	3:30659956:A:G	Chr3	30659956	G	A	0.397727	-0.27667	2.11636e-05
ENSBTAG00000021602	CTTNBP2NL	Chr3	30885081	3:30829877:T:A	Chr3	30829877	A	T	0.3125	0.272212	0.00276407
ENSBTAG00000014102	WDR77	Chr3	31863582	3:31084244:C:A	Chr3	31084244	C	A	0.32197	-0.320681	0.00470495
ENSBTAG00000000259	CHIA	Chr3	32090853	3:32091285:A:T	Chr3	32091285	A	T	0.242424	0.454919	9.0971e-22
ENSBTAG00000020172	DENND2D	Chr3	32204154	3:32277937:T:TG	Chr3	32277937	T	TG	0.276515	0.301701	0.000134676
ENSBTAG00000009888	DRAM2	Chr3	32272398	3:31912545:AC:A	Chr3	31912545	A	AC	0.439394	0.149613	0.0175303
ENSBTAG00000006466	CD53	Chr3	32533031	3:32623930:A:T	Chr3	32623930	A	T	0.460227	-0.120195	0.017994
ENSBTAG00000007352	KCNC4	Chr3	33216772	3:33194635:G:GA	Chr3	33194635	GA	G	0.496212	0.286444	4.36e-13
ENSBTAG00000001981	SLC6A17	Chr3	33281966	3:33226231:C:T	Chr3	33226231	C	T	0.202652	-0.354854	0.000394781
ENSBTAG00000018893	AHCYL1	Chr3	33444827	3:33418060:CTGTT:C	Chr3	33418060	CTGTT	C	0.325758	-0.608947	1.87218e-17
ENSBTAG00000013018	AMPD2	Chr3	33830235	3:33830262:C:T	Chr3	33830262	C	T	0.469697	0.125941	7.48814e-08
ENSBTAG00000029921	MIR197	Chr3	33850375	3:33010154:T:C	Chr3	33010154	C	T	0.356061	-0.34001	0.00723313
ENSBTAG00000014083	AMIGO1	Chr3	33940233	3:34004331:A:C	Chr3	34004331	C	A	0.464015	0.187888	1.26799e-12
ENSBTAG00000009042	ATXN7L2	Chr3	33965040	3:33948403:C:T	Chr3	33948403	C	T	0.157197	-0.482816	0.000260601
ENSBTAG00000008849	SORT1	Chr3	34036272	3:34124154:T:C	Chr3	34124154	C	T	0.456439	-1.68878e-07	5.20667e-05
ENSBTAG00000018804	CELSR2	Chr3	34157519	3:34256740:A:G	Chr3	34256740	G	A	0.486742	-7.12488e-08	1.13879e-11
ENSBTAG00000012962	SARS1	Chr3	34190011	3:34245815:C:CT	Chr3	34245815	CT	C	0.482955	-0.104091	8.33192e-07
ENSBTAG00000001136	ELAPOR1	Chr3	34215659	3:34217637:G:GT	Chr3	34217637	GT	G	0.484848	-4.6551e-07	3.32049e-11
ENSBTAG00000051851	NA	Chr3	34239641	3:34256740:A:G	Chr3	34256740	G	A	0.486742	-0.363534	5.39305e-07
ENSBTAG00000045530	SCARNA2	Chr3	34281597	3:34268020:T:C	Chr3	34268020	C	T	0.486742	-0.103716	4.55604e-08
ENSBTAG00000003752	SLC25A24	Chr3	35038388	3:35114146:A:G	Chr3	35114146	A	G	0.386364	-0.3844	1.84385e-06
ENSBTAG00000031575	VAV3	Chr3	35311503	3:35593055:A:G	Chr3	35593055	A	G	0.49053	-0.321394	3.38196e-06
ENSBTAG00000019093	AMY2B	Chr3	39858496	3:39675092:T:C	Chr3	39675092	C	T	0.469697	-0.176256	1.02762e-19
ENSBTAG00000049201	NA	Chr3	39883128	3:39953602:C:T	Chr3	39953602	T	C	0.208333	-0.426521	0.012909
ENSBTAG00000019091	RNPC3	Chr3	39883179	3:39897588:C:T	Chr3	39897588	T	C	0.4375	0.218942	5.52066e-12
ENSBTAG00000005990	S1PR1	Chr3	42039822	3:42184197:G:T	Chr3	42184197	T	G	0.335227	0.267685	4.60082e-05
ENSBTAG00000019029	DPH5	Chr3	42259116	3:41757386:A:G	Chr3	41757386	A	G	0.265152	0.251965	0.000111992
ENSBTAG00000019026	EXTL2	Chr3	42410255	3:42396925:C:T	Chr3	42396925	T	C	0.314394	0.320242	2.36259e-16
ENSBTAG00000007773	VCAM1	Chr3	42576599	3:42568966:C:CA	Chr3	42568966	C	CA	0.19697	-0.335496	2.38871e-10
ENSBTAG00000037539	NA	Chr3	42616930	3:42570057:A:T	Chr3	42570057	T	A	0.460227	-5.51601e-07	5.0225e-16
ENSBTAG00000006321	RTCA	Chr3	43034731	3:42048651:C:T	Chr3	42048651	T	C	0.285985	-0.292015	0.0112309
ENSBTAG00000006320	DBT	Chr3	43039360	3:43057068:T:A	Chr3	43057068	T	A	0.0855513	-0.266535	2.39541e-05
ENSBTAG00000015781	TRMT13	Chr3	43140707	3:43116601:A:G	Chr3	43116601	G	A	0.331439	-2.46293e-07	0.000101164
ENSBTAG00000015778	SASS6	Chr3	43140707	3:43230761:CAAACA:C	Chr3	43230761	CAAACA	C	0.49053	0.470812	2.15638e-08
ENSBTAG00000006491	AGL	Chr3	43432848	3:43471470:G:GT	Chr3	43471470	G	GT	0.0473485	-0.572105	0.000246411
ENSBTAG00000031461	SNX7	Chr3	44620479	3:44357599:G:A	Chr3	44357599	G	A	0.106061	-0.27602	1.44571e-05
ENSBTAG00000031358	DPYD	Chr3	45408338	3:45879922:G:A	Chr3	45879922	A	G	0.170455	0.226485	0.000107077
ENSBTAG00000008809	PTBP2	Chr3	46739928	3:46745468:A:T	Chr3	46745468	T	A	0.316288	0.26042	0.00443526
ENSBTAG00000004422	ALG14	Chr3	48405844	3:48409445:G:A	Chr3	48409445	A	G	0.416667	0.406086	1.32642e-12
ENSBTAG00000020344	SLC44A3	Chr3	48687899	3:48363812:C:T	Chr3	48363812	C	T	0.109848	-3.3133e-07	1.74068e-08
ENSBTAG00000007101	F3	Chr3	48954586	3:48183496:A:G	Chr3	48183496	A	G	0.371212	-0.265736	0.00693477
ENSBTAG00000009698	ABCD3	Chr3	49070167	3:49245129:T:G	Chr3	49245129	G	T	0.458333	0.142987	1.68904e-11
ENSBTAG00000018010	ABCA4	Chr3	49386862	3:48962802:C:T	Chr3	48962802	T	C	0.465909	0.257301	0.00747785
ENSBTAG00000007842	GCLM	Chr3	49581840	3:49537409:C:T	Chr3	49537409	T	C	0.450758	6.35186e-08	1.22229e-06
ENSBTAG00000020180	TMED5	Chr3	50290373	3:50953258:G:A	Chr3	50953258	G	A	0.253788	-0.128778	1.50236e-05
ENSBTAG00000001393	MTF2	Chr3	50402638	3:50406493:A:AT	Chr3	50406493	AT	A	0.496212	-0.416344	0.00707656
ENSBTAG00000018737	GLMN	Chr3	51122897	3:51172087:T:G	Chr3	51172087	T	G	0.109848	-0.614783	4.17506e-06
ENSBTAG00000006167	BTBD8	Chr3	51316954	3:51305401:T:C	Chr3	51305401	T	C	0.373106	0.251286	2.64075e-09
ENSBTAG00000016307	CDC7	Chr3	51880799	3:52118855:A:AT	Chr3	52118855	AT	A	0.238636	-0.276967	0.0021518
ENSBTAG00000020958	LRRC8D	Chr3	53443924	3:53411595:C:G	Chr3	53411595	G	C	0.193182	0.169165	0.000456574
ENSBTAG00000000900	LRRC8C	Chr3	53648204	3:54008988:A:G	Chr3	54008988	G	A	0.373106	0.283655	0.00176063
ENSBTAG00000020214	LRRC8B	Chr3	53713047	3:54433662:T:TG	Chr3	54433662	TG	T	0.304924	-0.0905768	4.12234e-06
ENSBTAG00000048959	NA	Chr3	53907633	3:54004279:C:T	Chr3	54004279	C	T	0.113636	0.344801	0.00927337
ENSBTAG00000015060	GBP5	Chr3	54094948	3:54097487:G:A	Chr3	54097487	G	A	0.113636	0.697458	4.39492e-10
ENSBTAG00000001143	NA	Chr3	54165067	3:53692676:AT:A	Chr3	53692676	AT	A	0.424242	0.12065	0.00181956
ENSBTAG00000037634	NA	Chr3	54187434	3:54200526:TTTCTTTATATCC:T	Chr3	54200526	TTTCTTTATATCC	T	0.157197	-0.965945	1.60388e-24
ENSBTAG00000014529	GBP4	Chr3	54451266	3:55217316:T:C	Chr3	55217316	T	C	0.450758	2.56805e-07	1.90547e-06
ENSBTAG00000024272	NA	Chr3	54620771	3:54765417:G:C	Chr3	54765417	C	G	0.380682	4.72152e-07	1.01273e-09
ENSBTAG00000002416	NA	Chr3	54790813	3:54891372:T:G	Chr3	54891372	T	G	0.443182	0.348803	2.4266e-08
ENSBTAG00000017670	NA	Chr3	54901261	3:54988998:A:G	Chr3	54988998	A	G	0.452652	-0.274167	0.000262116
ENSBTAG00000000505	KYAT3	Chr3	54928687	3:54520863:AT:A	Chr3	54520863	A	AT	0.136364	0.296482	3.81941e-10
ENSBTAG00000021900	PKN2	Chr3	55200622	3:55177891:GT:G	Chr3	55177891	GT	G	0.422348	0.386078	0.000118219
ENSBTAG00000000305	LMO4	Chr3	56715731	3:56660176:A:G	Chr3	56660176	A	G	0.44697	-0.210379	0.000151024
ENSBTAG00000052268	SELENOF	Chr3	57145265	3:57619110:C:T	Chr3	57619110	C	T	0.104167	-0.167323	0.000491237
ENSBTAG00000031171	SH3GLB1	Chr3	57314453	3:57041179:C:T	Chr3	57041179	C	T	0.484848	0.326176	0.000214867
ENSBTAG00000016712	CLCA3	Chr3	57444768	3:57007876:T:C	Chr3	57007876	T	C	0.100379	1.15247	6.801e-07
ENSBTAG00000048312	NA	Chr3	58314551	3:58731276:AAAAAATAAT:A	Chr3	58731276	AAAAAATAAT	A	0.0662879	0.782157	0.00628755
ENSBTAG00000034776	DDAH1	Chr3	58618307	3:58777300:C:CCCA	Chr3	58777300	C	CCCA	0.0814394	0.301332	5.73895e-07
ENSBTAG00000003444	SYDE2	Chr3	58890027	3:58363994:A:G	Chr3	58363994	G	A	0.471591	0.288214	0.00208841
ENSBTAG00000018942	SSX2IP	Chr3	59398297	3:59323150:C:T	Chr3	59323150	C	T	0.0776515	0.48434	0.000170563
ENSBTAG00000008122	GNG5	Chr3	59591886	3:59622696:C:T	Chr3	59622696	T	C	0.393939	-0.287642	1.78199e-21
ENSBTAG00000008118	RPF1	Chr3	59617167	3:59639040:G:A	Chr3	59639040	A	G	0.393939	-4.34776e-07	8.6252e-19
ENSBTAG00000024255	UOX	Chr3	59636717	3:59641805:C:T	Chr3	59641805	C	T	0.329545	-0.278398	9.53785e-08
ENSBTAG00000053482	SAMD13	Chr3	59819902	3:59833253:G:A	Chr3	59833253	A	G	0.278409	0.294908	0.00173852
ENSBTAG00000011953	PRKACB	Chr3	60026329	3:59682993:C:T	Chr3	59682993	T	C	0.242424	0.100717	0.00160812
ENSBTAG00000003322	TTLL7	Chr3	60110694	3:60111025:C:T	Chr3	60111025	T	C	0.204545	0.108931	0.00023463
ENSBTAG00000019733	ADGRL4	Chr3	65667176	3:65684997:T:C	Chr3	65684997	T	C	0.314394	0.367841	7.38458e-06
ENSBTAG00000030932	IFI44L	Chr3	66071372	3:66008007:G:A	Chr3	66008007	G	A	0.401515	-0.270637	0.00443531
ENSBTAG00000011733	GIPC2	Chr3	66637864	3:66546774:TCTCTCTCACACA:T	Chr3	66546774	TCTCTCTCACACA	T	0.109195	0.469263	1.92804e-10
ENSBTAG00000031044	MIGA1	Chr3	66883012	3:66899977:TAAC:T	Chr3	66899977	TAAC	T	0.44697	-0.250923	0.00685524
ENSBTAG00000020761	USP33	Chr3	66900557	3:66898159:C:T	Chr3	66898159	C	T	0.443182	0.337326	2.43407e-07
ENSBTAG00000031012	PIGK	Chr3	67430366	3:67775177:A:G	Chr3	67775177	A	G	0.335227	0.140874	1.27931e-05
ENSBTAG00000050685	NA	Chr3	68102694	3:68616142:G:T	Chr3	68616142	T	G	0.452652	-0.302538	0.00141563
ENSBTAG00000053587	NA	Chr3	68570134	3:68595116:G:C	Chr3	68595116	C	G	0.452652	-0.328119	8.35851e-07
ENSBTAG00000005196	TYW3	Chr3	69990582	3:70011355:T:C	Chr3	70011355	C	T	0.191288	-0.637795	2.5701e-18
ENSBTAG00000038480	FPGT	Chr3	70608293	3:70610642:AT:A	Chr3	70610642	A	AT	0.496212	-0.15812	0.00414683
ENSBTAG00000019230	PTGER3	Chr3	74185667	3:74277335:A:G	Chr3	74277335	G	A	0.344697	0.275938	7.17438e-05
ENSBTAG00000014791	CTH	Chr3	74793722	3:74745744:T:A	Chr3	74745744	A	T	0.441288	0.222529	9.67471e-11
ENSBTAG00000054533	GNG12	Chr3	77489269	3:77489908:A:G	Chr3	77489908	A	G	0.227273	0.305269	1.02044e-10
ENSBTAG00000005445	SLC35D1	Chr3	78274132	3:78300305:G:A	Chr3	78300305	G	A	0.431818	-0.14277	6.24853e-07
ENSBTAG00000011097	DYNLT5	Chr3	78571153	3:78674475:A:ATTG	Chr3	78674475	A	ATTG	0.0265152	1.46385	1.14198e-12
ENSBTAG00000005910	LEPR	Chr3	79838382	3:80733840:T:C	Chr3	80733840	C	T	0.435606	0.200061	0.0154845
ENSBTAG00000030749	DNAJC6	Chr3	80107385	3:79873992:G:A	Chr3	79873992	G	A	0.128788	0.470185	0.00021257
ENSBTAG00000030686	RAVER2	Chr3	80721387	3:80643390:G:T	Chr3	80643390	T	G	0.420455	-2.71506e-07	0.000282415
ENSBTAG00000016455	CACHD1	Chr3	81022967	3:81150836:A:T	Chr3	81150836	A	T	0.327652	0.385058	7.49448e-22
ENSBTAG00000019011	PGM1	Chr3	81978206	3:82187568:T:A	Chr3	82187568	T	A	0.403409	0.164021	0.0135148
ENSBTAG00000030710	ITGB3BP	Chr3	82052301	3:81427585:G:GT	Chr3	81427585	G	GT	0.0492424	1.08165	0.000451214
ENSBTAG00000010124	ATG4C	Chr3	82852335	3:83786591:TA:T	Chr3	83786591	T	TA	0.340909	-0.174688	3.28299e-05
ENSBTAG00000019877	DOCK7	Chr3	82924989	3:81985890:T:TA	Chr3	81985890	T	TA	0.0681818	-0.332982	0.00116108
ENSBTAG00000021386	ANGPTL3	Chr3	83003679	3:83633695:A:C	Chr3	83633695	A	C	0.155303	-0.228923	0.000210317
ENSBTAG00000020451	USP1	Chr3	83129455	3:83645827:G:A	Chr3	83645827	A	G	0.314394	0.296401	0.00198533
ENSBTAG00000017161	TM2D1	Chr3	83947668	3:84722050:G:A	Chr3	84722050	G	A	0.0643939	0.371301	0.0105781
ENSBTAG00000051542	NA	Chr3	85836233	3:85841761:C:T	Chr3	85841761	C	T	0.36553	0.396226	3.16593e-20
ENSBTAG00000051904	NA	Chr3	85911870	3:85900439:G:A	Chr3	85900439	G	A	0.414773	-0.159196	1.11896e-06
ENSBTAG00000053766	NA	Chr3	85970058	3:86033741:T:C	Chr3	86033741	T	C	0.0984849	6.36384e-07	7.8956e-12
ENSBTAG00000051030	NA	Chr3	86053819	3:85989884:A:G	Chr3	85989884	A	G	0.227273	-0.204505	0.0075287
ENSBTAG00000030669	FGGY	Chr3	86718004	3:86659280:G:A	Chr3	86659280	G	A	0.386364	-0.279257	1.20556e-09
ENSBTAG00000013961	MYSM1	Chr3	87349596	3:87478875:C:T	Chr3	87478875	C	T	0.0814394	-0.389141	0.0154565
ENSBTAG00000017326	OMA1	Chr3	87479246	3:87475360:G:A	Chr3	87475360	G	A	0.0852273	-0.921613	5.7098e-09
ENSBTAG00000003775	C8B	Chr3	89165720	3:89184833:G:A	Chr3	89184833	G	A	0.403409	0.319698	1.91919e-11
ENSBTAG00000003774	C8A	Chr3	89291700	3:89245194:AG:A	Chr3	89245194	A	AG	0.339015	0.0805931	0.00152793
ENSBTAG00000009314	FYB2	Chr3	89336375	3:89336769:A:G	Chr3	89336769	G	A	0.452652	1.66196e-08	0.00433285
ENSBTAG00000018747	PRKAA2	Chr3	89549744	3:89547157:A:ATAACTTATATTTTTATTT	Chr3	89547157	ATAACTTATATTTTTATTT	A	0.498106	-9.26957e-09	1.40806e-09
ENSBTAG00000011640	PLPP3	Chr3	89608084	3:90468469:GTC:G	Chr3	90468469	GTC	G	0.0700758	0.473824	0.00422743
ENSBTAG00000017132	TTC22	Chr3	91489659	3:91489762:T:C	Chr3	91489762	T	C	0.0738636	0.61335	0.000268028
ENSBTAG00000040313	PARS2	Chr3	91528852	3:90901745:G:C	Chr3	90901745	C	G	0.44697	-0.559876	1.77197e-06
ENSBTAG00000015931	TTC4	Chr3	91564769	3:91496536:G:A	Chr3	91496536	G	A	0.299242	0.479261	0.000156023
ENSBTAG00000010717	SSBP3	Chr3	91841231	3:92803268:C:T	Chr3	92803268	C	T	0.282197	0.258444	0.0072899
ENSBTAG00000010715	MRPL37	Chr3	92033861	3:92024051:A:G	Chr3	92024051	G	A	0.403409	-0.182414	2.45252e-05
ENSBTAG00000020037	CYB5RL	Chr3	92033901	3:92039778:A:G	Chr3	92039778	A	G	0.284091	-0.251022	5.7241e-05
ENSBTAG00000050962	YIPF1	Chr3	92329345	3:92470326:T:C	Chr3	92470326	T	C	0.193182	0.282699	0.000365779
ENSBTAG00000003484	CZIB	Chr3	93014105	3:93150610:G:A	Chr3	93150610	G	A	0.204545	0.216426	4.3178e-05
ENSBTAG00000014649	CPT2	Chr3	93057118	3:93637565:A:G	Chr3	93637565	A	G	0.3125	-0.121032	0.0167043
ENSBTAG00000054697	NA	Chr3	93249188	3:93218275:A:C	Chr3	93218275	A	C	0.3125	3.36397e-07	2.02742e-11
ENSBTAG00000003746	SCP2	Chr3	93393567	3:94359863:C:T	Chr3	94359863	T	C	0.380682	-0.142798	0.0124361
ENSBTAG00000002910	ECHDC2	Chr3	93434007	3:93469854:A:C	Chr3	93469854	A	C	0.337121	-0.139492	2.02025e-09
ENSBTAG00000019680	ZYG11B	Chr3	93615853	3:93610314:A:G	Chr3	93610314	A	G	0.410985	-0.302887	5.04709e-06
ENSBTAG00000002721	TUT4	Chr3	93801867	3:93699556:T:G	Chr3	93699556	G	T	0.337121	-0.19336	8.10963e-12
ENSBTAG00000015896	CC2D1B	Chr3	93998823	3:93520253:G:A	Chr3	93520253	G	A	0.248106	-2.21756e-07	2.06922e-14
ENSBTAG00000011025	BTF3L4	Chr3	94278300	3:94247768:CT:C	Chr3	94247768	C	CT	0.465909	0.158544	0.000326476
ENSBTAG00000021170	OSBPL9	Chr3	94702613	3:94547624:G:A	Chr3	94547624	G	A	0.492424	-0.174092	0.0122531
ENSBTAG00000014225	SLC5A9	Chr3	98001735	3:98105143:T:C	Chr3	98105143	T	C	0.450758	0.213465	0.0174784
ENSBTAG00000051070	NA	Chr3	98834630	3:98863644:C:CCCG	Chr3	98863644	C	CCCG	0.359848	-0.354255	2.46375e-10
ENSBTAG00000019956	CMPK1	Chr3	98924294	3:98888207:C:T	Chr3	98888207	C	T	0.125	-0.151395	0.0156804
ENSBTAG00000002555	PDZK1IP1	Chr3	99025650	3:99029587:G:A	Chr3	99029587	G	A	0.168561	0.159331	8.60543e-15
ENSBTAG00000037890	CYP4A11	Chr3	99208578	3:99131091:A:G	Chr3	99131091	A	G	0.359848	0.099602	2.87814e-10
ENSBTAG00000000229	NA	Chr3	99242276	3:99399062:C:A	Chr3	99399062	A	C	0.498106	2.20246e-07	2.70119e-11
ENSBTAG00000013481	CYP4A22	Chr3	99319613	3:99067773:T:C	Chr3	99067773	T	C	0.168561	-4.83604e-07	1.0903e-12
ENSBTAG00000011976	CYP4B1	Chr3	99358612	3:99354567:A:G	Chr3	99354567	A	G	0.335227	0.252867	8.9611e-08
ENSBTAG00000000097	EFCAB14	Chr3	99421570	3:99427075:T:G	Chr3	99427075	T	G	0.11553	-0.265394	8.08219e-06
ENSBTAG00000007507	FAAH	Chr3	99737813	3:99826684:T:A	Chr3	99826684	T	A	0.3125	-0.324126	1.73126e-06
ENSBTAG00000045664	LRRC41	Chr3	99799406	3:99819242:A:G	Chr3	99819242	G	A	0.424242	-0.385341	2.50987e-05
ENSBTAG00000013322	POMGNT1	Chr3	99869872	3:100156068:C:G	Chr3	100156068	G	C	0.361742	-0.315127	0.009957
ENSBTAG00000020444	MAST2	Chr3	100278380	3:100421855:A:G	Chr3	100421855	A	G	0.0568182	0.296428	0.00524423
ENSBTAG00000016377	IPP	Chr3	100332769	3:100315153:C:T	Chr3	100315153	T	C	0.117424	0.633991	8.72911e-08
ENSBTAG00000000497	AKR1A1	Chr3	100517388	3:100441058:C:G	Chr3	100441058	G	C	0.274621	0.337875	3.43092e-09
ENSBTAG00000011243	TOE1	Chr3	100731168	3:100765612:G:A	Chr3	100765612	G	A	0.0568182	-0.445199	0.0119715
ENSBTAG00000012648	ZSWIM5	Chr3	100852667	3:101057435:T:C	Chr3	101057435	C	T	0.433712	-0.346572	0.00110638
ENSBTAG00000039529	BTBD19	Chr3	101205864	3:101061895:C:G	Chr3	101061895	G	C	0.409091	-0.357688	0.00332083
ENSBTAG00000006125	PLK3	Chr3	101213711	3:101225953:T:C	Chr3	101225953	C	T	0.410985	-0.400625	0.000330175
ENSBTAG00000015285	RPS8	Chr3	101235265	3:101260945:C:T	Chr3	101260945	T	C	0.458333	-0.274526	1.9682e-05
ENSBTAG00000018887	IPO13	Chr3	102111545	3:102170805:C:T	Chr3	102170805	C	T	0.0227273	0.799372	5.3236e-10
ENSBTAG00000017656	ST3GAL3	Chr3	102311428	3:102182658:A:AG	Chr3	102182658	A	AG	0.155303	-5.55751e-07	1.21719e-16
ENSBTAG00000002078	KDM4A	Chr3	102382969	3:102358429:C:A	Chr3	102358429	C	A	0.155303	-0.443513	7.48388e-11
ENSBTAG00000000253	PTPRF	Chr3	102498351	3:102477555:T:G	Chr3	102477555	T	G	0.284091	-0.0943907	0.000278546
ENSBTAG00000016899	ELOVL1	Chr3	102629292	3:102282871:G:A	Chr3	102282871	A	G	0.126894	-0.429053	2.23852e-05
ENSBTAG00000003777	TIE1	Chr3	102714614	3:102714559:C:T	Chr3	102714559	C	T	0.134981	0.61363	1.96898e-06
ENSBTAG00000021544	EBNA1BP2	Chr3	102838620	3:102846454:C:G	Chr3	102846454	G	C	0.439394	0.342216	1.72075e-05
ENSBTAG00000017388	SVBP	Chr3	103432471	3:103431549:A:G	Chr3	103431549	G	A	0.38447	-0.361372	7.39855e-06
ENSBTAG00000017382	P3H1	Chr3	103472228	3:103506523:C:T	Chr3	103506523	C	T	0.304924	0.386846	0.000480069
ENSBTAG00000004585	CCDC30	Chr3	103700789	3:104379126:G:A	Chr3	104379126	G	A	0.0246212	1.06747	0.000365711
ENSBTAG00000012982	PPCS	Chr3	103720404	3:104479145:G:A	Chr3	104479145	G	A	0.0246212	-0.847723	0.00815615
ENSBTAG00000001629	SCMH1	Chr3	104965054	3:105145434:T:G	Chr3	105145434	T	G	0.270833	0.308311	0.00165876
ENSBTAG00000001626	CTPS1	Chr3	105280146	3:105212652:G:A	Chr3	105212652	G	A	0.0208333	0.435014	2.60925e-07
ENSBTAG00000000533	ZNF684	Chr3	105622276	3:105587996:A:G	Chr3	105587996	G	A	0.299242	0.608803	6.53089e-09
ENSBTAG00000000532	EXO5	Chr3	105644310	3:105857308:A:AG	Chr3	105857308	AG	A	0.460227	-0.333845	0.00588988
ENSBTAG00000044178	ZMPSTE24	Chr3	105867157	3:105804902:C:T	Chr3	105804902	T	C	0.234848	-4.11434e-07	3.05496e-09
ENSBTAG00000019695	RLF	Chr3	105974325	3:105474315:T:G	Chr3	105474315	T	G	0.424242	0.234293	0.00594699
ENSBTAG00000013367	PPT1	Chr3	106020189	3:106554861:G:C	Chr3	106554861	G	C	0.126894	-7.21964e-08	1.80492e-05
ENSBTAG00000013054	MFSD2A	Chr3	106136408	3:106367368:T:C	Chr3	106367368	T	C	0.123106	-0.241938	0.00686001
ENSBTAG00000013832	TRIT1	Chr3	106204848	3:106211133:A:G	Chr3	106211133	A	G	0.418561	-4.83103e-07	4.76035e-15
ENSBTAG00000047314	PPIE	Chr3	106344433	3:106367368:T:C	Chr3	106367368	T	C	0.123106	0.174734	0.00254191
ENSBTAG00000014538	HPCAL4	Chr3	106386093	3:106368093:T:C	Chr3	106368093	T	C	0.123106	0.803467	2.15635e-16
ENSBTAG00000008688	HEYL	Chr3	106442590	3:107088831:T:C	Chr3	107088831	C	T	0.25947	0.237651	0.000424845
ENSBTAG00000021024	MACF1	Chr3	106927295	3:106773269:C:T	Chr3	106773269	T	C	0.352273	-0.130428	0.0119038
ENSBTAG00000004715	AKIRIN1	Chr3	106998848	3:106966400:G:T	Chr3	106966400	G	T	0.251894	-0.232325	0.000155055
ENSBTAG00000002306	UTP11	Chr3	107957939	3:107953023:G:A	Chr3	107953023	G	A	0.325758	0.41708	4.39403e-07
ENSBTAG00000007299	SF3A3	Chr3	107971021	3:107948161:G:C	Chr3	107948161	G	C	0.418561	0.308111	0.00273694
ENSBTAG00000046989	MANEAL	Chr3	108120963	3:108140717:C:T	Chr3	108140717	C	T	0.168561	0.517416	1.66266e-07
ENSBTAG00000024097	MRPS15	Chr3	109431031	3:109395731:A:G	Chr3	109395731	A	G	0.308712	-0.406455	3.90865e-10
ENSBTAG00000007994	OSCP1	Chr3	109442373	3:109599621:AG:A	Chr3	109599621	AG	A	0.0852273	1.0766	1.0521e-15
ENSBTAG00000024096	LSM10	Chr3	109482125	3:110164522:G:A	Chr3	110164522	G	A	0.0549242	0.734879	2.8645e-10
ENSBTAG00000049000	NA	Chr3	109488450	3:109488375:G:T	Chr3	109488375	G	T	0.0681818	1.53612e-07	1.88064e-08
ENSBTAG00000015969	STK40	Chr3	109490895	3:109561696:G:C	Chr3	109561696	G	C	0.44697	-0.136054	4.3023e-06
ENSBTAG00000014358	EVA1B	Chr3	109535133	3:109866199:A:G	Chr3	109866199	G	A	0.473485	0.289194	3.35207e-05
ENSBTAG00000038617	SH3D21	Chr3	109551436	3:109344393:T:C	Chr3	109344393	C	T	0.49053	-0.172396	0.000522817
ENSBTAG00000030301	MAP7D1	Chr3	109671174	3:109671760:G:A	Chr3	109671760	A	G	0.361742	-0.151553	0.00360127
ENSBTAG00000005732	TRAPPC3	Chr3	109676149	3:109633031:A:G	Chr3	109633031	A	G	0.202652	-0.440438	6.21888e-05
ENSBTAG00000016696	NCDN	Chr3	110210854	3:109265823:A:G	Chr3	109265823	A	G	0.232955	0.234365	0.0090709
ENSBTAG00000006555	ZMYM1	Chr3	110623103	3:111160373:T:C	Chr3	111160373	T	C	0.183712	0.33	0.0122097
ENSBTAG00000014596	EFHD1	Chr3	112396169	3:112420101:C:G	Chr3	112420101	C	G	0.210227	0.512273	3.82822e-08
ENSBTAG00000008942	NGEF	Chr3	112657496	3:112741418:TC:T	Chr3	112741418	TC	T	0.17803	0.419254	9.32313e-05
ENSBTAG00000044861	NA	Chr3	112988387	3:112225094:A:G	Chr3	112225094	A	G	0.157197	0.324979	0.000756023
ENSBTAG00000000149	USP40	Chr3	113257470	3:113179525:A:C	Chr3	113179525	A	C	0.232955	0.310669	0.0001356
ENSBTAG00000014652	TRPM8	Chr3	113586058	3:113634006:AT:A	Chr3	113634006	A	AT	0.471591	0.425468	1.49123e-12
ENSBTAG00000002030	SPP2	Chr3	113703202	3:113730785:C:T	Chr3	113730785	C	T	0.0340909	-0.63142	0.00619255
ENSBTAG00000054838	NA	Chr3	113885086	3:113790129:G:C	Chr3	113790129	C	G	0.339015	0.397622	1.13052e-06
ENSBTAG00000016504	AGAP1	Chr3	115044732	3:115044555:C:T	Chr3	115044555	T	C	0.168605	-0.394536	0.000308736
ENSBTAG00000018424	ACKR3	Chr3	116025263	3:116325373:T:A	Chr3	116325373	T	A	0.215909	-0.356609	0.000108115
ENSBTAG00000005854	COPS8	Chr3	116552175	3:116546987:C:T	Chr3	116546987	C	T	0.0965909	0.397976	0.00481639
ENSBTAG00000030190	COL6A3	Chr3	116855219	3:117168338:G:A	Chr3	117168338	G	A	0.475379	-0.303285	6.49005e-05
ENSBTAG00000000634	MLPH	Chr3	116959555	3:116947576:C:T	Chr3	116947576	T	C	0.443182	-0.916478	3.93868e-23
ENSBTAG00000017624	RAB17	Chr3	117043357	3:116850590:T:C	Chr3	116850590	T	C	0.443182	-0.373756	2.79078e-14
ENSBTAG00000011534	RAMP1	Chr3	117279523	3:117211965:G:GA	Chr3	117211965	GA	G	0.392045	-0.434909	1.65178e-05
ENSBTAG00000017826	SCLY	Chr3	117410454	3:117686940:G:A	Chr3	117686940	G	A	0.140152	-0.308306	1.12752e-12
ENSBTAG00000052151	NA	Chr3	117547512	3:117551992:C:A	Chr3	117551992	C	A	0.223485	-0.459388	1.17354e-12
ENSBTAG00000015973	TRAF3IP1	Chr3	117639172	3:117687861:G:A	Chr3	117687861	G	A	0.210227	0.666159	5.92799e-11
ENSBTAG00000003279	NDUFA10	Chr3	118923959	3:118874144:C:T	Chr3	118874144	C	T	0.232955	0.777789	1.45931e-25
ENSBTAG00000010910	COPS9	Chr3	119666681	3:118672589:C:G	Chr3	118672589	C	G	0.0814394	-0.529653	0.000487876
ENSBTAG00000015996	GPC1	Chr3	119863650	3:119857618:T:C	Chr3	119857618	C	T	0.424242	-0.366405	2.51741e-09
ENSBTAG00000049766	DUSP28	Chr3	119952859	3:120021595:A:G	Chr3	120021595	G	A	0.278409	0.250076	0.000509833
ENSBTAG00000030193	GPR35	Chr3	120005504	3:119929301:C:T	Chr3	119929301	C	T	0.157197	-0.547232	0.000866797
ENSBTAG00000005797	AGXT	Chr3	120153537	3:120153841:T:C	Chr3	120153841	T	C	0.234848	0.215576	3.80669e-11
ENSBTAG00000014132	SNED1	Chr3	120284115	3:120188930:G:C	Chr3	120188930	G	C	0.354167	-0.399168	0.000550327
ENSBTAG00000000789	PPP1R7	Chr3	120373078	3:120786902:A:G	Chr3	120786902	A	G	0.232955	-0.490513	6.11937e-06
ENSBTAG00000002608	SEPTIN2	Chr3	120482708	3:120479623:G:C	Chr3	120479623	G	C	0.208333	-0.264831	7.26955e-05
ENSBTAG00000013110	FARP2	Chr3	120512442	3:120571195:C:A	Chr3	120571195	C	A	0.159091	0.420419	0.000155233
ENSBTAG00000008711	BOK	Chr3	120646407	3:120661371:A:T	Chr3	120661371	A	T	0.0776515	0.324287	6.75025e-08
ENSBTAG00000002847	D2HGDH	Chr3	120765584	3:120789447:G:A	Chr3	120789447	G	A	0.278409	-0.728173	9.1476e-23
ENSBTAG00000023806	COBL	Chr4	4582610	4:4507252:T:C	Chr4	4507252	T	C	0.0587121	-0.172835	0.0176174
ENSBTAG00000020869	DDC	Chr4	5336437	4:5316962:C:T	Chr4	5316962	C	T	0.17803	-0.234308	6.3347e-05
ENSBTAG00000035064	C4H7orf57	Chr4	7697356	4:7721111:A:T	Chr4	7721111	A	T	0.278409	0.190252	2.16218e-16
ENSBTAG00000008155	SUN3	Chr4	7704657	4:7705352:G:A	Chr4	7705352	G	A	0.327652	0.249999	1.3259e-18
ENSBTAG00000048664	CDK14	Chr4	7937944	4:7420754:G:C	Chr4	7420754	G	C	0.357955	-0.275873	0.0170151
ENSBTAG00000002107	FZD1	Chr4	8665916	4:9113233:C:T	Chr4	9113233	C	T	0.375	-0.294849	3.33481e-09
ENSBTAG00000045617	MTERF1	Chr4	9254862	4:9237585:C:T	Chr4	9237585	T	C	0.126894	0.360448	0.000227415
ENSBTAG00000007442	AKAP9	Chr4	9333129	4:9275308:T:A	Chr4	9275308	T	A	0.206439	0.2039	0.0120505
ENSBTAG00000001571	LRRD1	Chr4	9504398	4:9488869:G:A	Chr4	9488869	G	A	0.380682	0.48229	3.23359e-18
ENSBTAG00000021996	GATAD1	Chr4	9764440	4:9775713:T:C	Chr4	9775713	T	C	0.316288	0.395389	0.000904307
ENSBTAG00000018363	RBM48	Chr4	9870504	4:9844514:T:TA	Chr4	9844514	T	TA	0.467803	-0.325574	0.000410297
ENSBTAG00000024431	PEX1	Chr4	9870626	4:9666869:A:G	Chr4	9666869	G	A	0.242424	-0.397017	3.95247e-06
ENSBTAG00000053050	SAMD9	Chr4	10468917	4:10465688:A:G	Chr4	10465688	A	G	0.123106	0.357323	1.7976e-07
ENSBTAG00000015844	TFPI2	Chr4	11208760	4:11262373:T:A	Chr4	11262373	T	A	0.337121	0.162978	1.11303e-05
ENSBTAG00000015654	PON1	Chr4	12576328	4:12576463:A:G	Chr4	12576463	A	G	0.354167	-0.223908	2.29253e-09
ENSBTAG00000034645	PON3	Chr4	12631421	4:11638714:CA:C	Chr4	11638714	CA	C	0.107955	-0.837224	2.2437e-09
ENSBTAG00000008361	PON2	Chr4	12673193	4:12048861:G:A	Chr4	12048861	G	A	0.0606061	-0.25029	0.00143046
ENSBTAG00000018185	ASB4	Chr4	12750330	4:12493735:A:T	Chr4	12493735	A	T	0.0606061	1.43707	7.59909e-11
ENSBTAG00000027134	DYNC1I1	Chr4	13061841	4:13524675:G:A	Chr4	13524675	G	A	0.164773	-0.335789	0.000626875
ENSBTAG00000003773	SLC25A13	Chr4	13692192	4:13693756:A:C	Chr4	13693756	A	C	0.36553	-0.340253	4.42103e-09
ENSBTAG00000004995	C1GALT1	Chr4	15276633	4:15355073:G:A	Chr4	15355073	A	G	0.257576	0.165796	0.00373663
ENSBTAG00000024420	COL28A1	Chr4	15603392	4:15592349:C:T	Chr4	15592349	C	T	0.164773	0.404018	1.47486e-12
ENSBTAG00000013781	MIOS	Chr4	15634973	4:15686611:G:A	Chr4	15686611	G	A	0.183712	0.408325	0.00010668
ENSBTAG00000013168	RPA3	Chr4	15695690	4:15704487:C:T	Chr4	15704487	C	T	0.371212	-0.26276	5.54943e-10
ENSBTAG00000008533	GLCCI1	Chr4	16051522	4:16094335:A:G	Chr4	16094335	A	G	0.477273	-0.245069	0.00811209
ENSBTAG00000011145	NDUFA4	Chr4	19049196	4:18742506:A:G	Chr4	18742506	G	A	0.465909	-0.227282	2.04357e-05
ENSBTAG00000007680	THSD7A	Chr4	19990379	4:19871234:C:A	Chr4	19871234	A	C	0.107955	-0.452981	1.62383e-06
ENSBTAG00000009786	SCIN	Chr4	20624427	4:20650538:C:T	Chr4	20650538	C	T	0.363636	-0.102085	0.000203693
ENSBTAG00000034154	AGMO	Chr4	23947179	4:24549839:G:A	Chr4	24549839	G	A	0.126894	-0.613491	1.09076e-12
ENSBTAG00000015073	CRPPA	Chr4	24921062	4:24952980:T:TA	Chr4	24952980	TA	T	0.475379	-0.587659	2.62153e-14
ENSBTAG00000007746	AHR	Chr4	25805797	4:25741598:A:G	Chr4	25741598	G	A	0.206439	-0.265545	0.00291223
ENSBTAG00000006721	POLR1F	Chr4	28410479	4:28358782:A:G	Chr4	28358782	A	G	0.420455	-0.437538	1.62505e-06
ENSBTAG00000004976	CDCA7L	Chr4	30904166	4:30746334:T:C	Chr4	30746334	T	C	0.17803	0.853993	9.94285e-13
ENSBTAG00000051150	TOMM7	Chr4	31527812	4:31702863:A:G	Chr4	31702863	A	G	0.352273	0.502153	3.50566e-06
ENSBTAG00000016010	KLHL7	Chr4	31768333	4:30832436:A:G	Chr4	30832436	A	G	0.242424	-0.261985	0.00720435
ENSBTAG00000016014	NUP42	Chr4	31829702	4:31995964:T:C	Chr4	31995964	T	C	0.229167	-0.41616	0.00635394
ENSBTAG00000019403	MALSU1	Chr4	31917459	4:31926696:A:G	Chr4	31926696	A	G	0.450758	-0.390124	7.60135e-15
ENSBTAG00000019406	IGF2BP3	Chr4	32088119	4:31967765:G:GA	Chr4	31967765	G	GA	0.316288	0.208781	1.26486e-07
ENSBTAG00000014711	DBF4	Chr4	32315089	4:32268133:A:G	Chr4	32268133	A	G	0.100379	-0.45528	0.00180379
ENSBTAG00000054987	SLC25A40	Chr4	32315218	4:32055463:A:T	Chr4	32055463	A	T	0.3125	0.367477	0.0128082
ENSBTAG00000052947	NA	Chr4	32419402	4:31970183:G:A	Chr4	31970183	G	A	0.369318	0.53544	9.32677e-06
ENSBTAG00000021313	RUNDC3B	Chr4	32564175	4:32564015:G:C	Chr4	32564015	G	C	0.231061	0.477559	9.58677e-17
ENSBTAG00000005997	NA	Chr4	32880213	4:33825231:A:C	Chr4	33825231	A	C	0.284091	-0.432848	6.74134e-05
ENSBTAG00000021535	CROT	Chr4	33144192	4:33171676:C:G	Chr4	33171676	C	G	0.169202	-0.334512	2.89881e-06
ENSBTAG00000004023	ELAPOR2	Chr4	33398733	4:33399808:C:CA	Chr4	33399808	C	CA	0.348485	-0.393562	6.13781e-07
ENSBTAG00000020569	CACNA2D1	Chr4	38152731	4:38484308:G:A	Chr4	38484308	G	A	0.4375	-0.697524	5.10313e-18
ENSBTAG00000017866	CD36	Chr4	40443336	4:40540729:TG:T	Chr4	40540729	T	TG	0.494318	-0.247191	4.41845e-06
ENSBTAG00000002714	GNAI1	Chr4	41062151	4:41005725:C:T	Chr4	41005725	C	T	0.236742	-3.13907e-07	9.53772e-10
ENSBTAG00000053714	NA	Chr4	41794763	4:41238030:C:T	Chr4	41238030	C	T	0.210227	-3.16906e-07	1.05508e-10
ENSBTAG00000003825	PTPN12	Chr4	43690863	4:43642351:A:C	Chr4	43642351	A	C	0.0606061	-0.498321	0.000869277
ENSBTAG00000018430	GSAP	Chr4	43815427	4:43568847:T:TA	Chr4	43568847	T	TA	0.092803	-0.247409	0.00646841
ENSBTAG00000014879	FAM185A	Chr4	44057956	4:44301553:AAAAT:A	Chr4	44301553	AAAAT	A	0.244318	-0.500686	1.00405e-06
ENSBTAG00000024379	LRRC17	Chr4	44155992	4:44258142:A:G	Chr4	44258142	A	G	0.433712	0.343543	0.00664434
ENSBTAG00000014161	ARMC10	Chr4	44363509	4:44394519:T:C	Chr4	44394519	C	T	0.219697	-0.216601	0.000637661
ENSBTAG00000006876	PMPCB	Chr4	44516586	4:44348302:T:A	Chr4	44348302	T	A	0.242424	-0.325805	1.42048e-05
ENSBTAG00000003784	DNAJC2	Chr4	44565511	4:44500054:G:C	Chr4	44500054	G	C	0.215909	0.251753	0.0153855
ENSBTAG00000046712	PSMC2	Chr4	44569084	4:44565709:C:A	Chr4	44565709	A	C	0.257576	-0.291244	1.36568e-08
ENSBTAG00000003658	RELN	Chr4	45211015	4:44902455:A:C	Chr4	44902455	C	A	0.431818	0.311736	3.69645e-05
ENSBTAG00000040058	ORC5	Chr4	45418109	4:45562830:T:TTG	Chr4	45562830	TTG	T	0.458333	-0.220105	0.00500038
ENSBTAG00000002175	SRPK2	Chr4	46536298	4:46198955:G:GT	Chr4	46198955	G	GT	0.340909	-0.167893	0.00251502
ENSBTAG00000008302	RINT1	Chr4	46646923	4:46552233:C:A	Chr4	46552233	A	C	0.297348	0.352969	0.000888049
ENSBTAG00000019794	SYPL1	Chr4	47180223	4:47145729:G:A	Chr4	47145729	A	G	0.357955	0.330773	0.00157333
ENSBTAG00000014958	PRKAR2B	Chr4	48154066	4:48135982:A:G	Chr4	48135982	G	A	0.4375	0.255739	3.52254e-09
ENSBTAG00000021849	DUS4L	Chr4	48572837	4:48640804:TA:T	Chr4	48640804	TA	T	0.477273	-0.433652	9.78937e-10
ENSBTAG00000001908	DLD	Chr4	48953178	4:48921914:C:A	Chr4	48921914	C	A	0.198864	-0.198143	3.45581e-05
ENSBTAG00000011412	LAMB1	Chr4	49062759	4:48811281:T:C	Chr4	48811281	T	C	0.498106	0.166539	0.0104718
ENSBTAG00000006732	NRCAM	Chr4	49563305	4:49460035:A:C	Chr4	49460035	C	A	0.426136	-0.250249	8.54991e-07
ENSBTAG00000024387	PNPLA8	Chr4	49629500	4:49654200:T:C	Chr4	49654200	T	C	0.397727	0.271091	0.000412444
ENSBTAG00000000169	ASZ1	Chr4	51002522	4:51063067:C:A	Chr4	51063067	C	A	0.5	0.256515	0.000186453
ENSBTAG00000010756	ST7	Chr4	51456320	4:51455204:T:C	Chr4	51455204	T	C	0.251894	0.376387	0.00700589
ENSBTAG00000006161	MET	Chr4	51735652	4:51707989:G:C	Chr4	51707989	G	C	0.287879	-0.340608	2.08337e-07
ENSBTAG00000021204	TES	Chr4	52225054	4:52362230:T:G	Chr4	52362230	G	T	0.359848	0.284099	0.00483194
ENSBTAG00000021543	MDFIC	Chr4	53541143	4:53636703:CACATAAGAATTACCACAATCTATTAATACAACTAA:C	Chr4	53636703	CACATAAGAATTACCACAATCTATTAATACAACTAA	C	0.325758	-0.115812	0.000523626
ENSBTAG00000021182	DOCK4	Chr4	56119634	4:56516913:G:A	Chr4	56516913	G	A	0.4375	0.385917	4.12087e-09
ENSBTAG00000013050	ZNF277	Chr4	56120652	4:56126902:AT:A	Chr4	56126902	AT	A	0.267045	0.420248	8.10965e-19
ENSBTAG00000004398	IMMP2L	Chr4	56808964	4:56920672:G:A	Chr4	56920672	A	G	0.399621	-0.317094	1.37815e-06
ENSBTAG00000003490	ELMO1	Chr4	59867413	4:59721852:G:A	Chr4	59721852	G	A	0.217803	0.117896	0.000503172
ENSBTAG00000018119	AOAH	Chr4	60544209	4:60533943:G:A	Chr4	60533943	A	G	0.388258	0.29311	1.28759e-11
ENSBTAG00000001182	SEPTIN7	Chr4	61302729	4:61179495:C:G	Chr4	61179495	C	G	0.267045	0.36329	2.28417e-12
ENSBTAG00000005785	DPY19L1	Chr4	61976305	4:61980326:A:G	Chr4	61980326	A	G	0.367424	0.38632	1.17688e-10
ENSBTAG00000016707	FKBP9	Chr4	63854573	4:63887485:A:C	Chr4	63887485	C	A	0.380682	-3.05952e-07	1.03531e-16
ENSBTAG00000003114	AVL9	Chr4	64010228	4:64607232:T:C	Chr4	64607232	T	C	0.287879	-3.20425e-07	6.99028e-06
ENSBTAG00000009390	MINDY4	Chr4	65585947	4:65679168:CCT:C	Chr4	65679168	CCT	C	0.107955	1.35608	5.01031e-15
ENSBTAG00000001448	INMT	Chr4	65603907	4:65612204:A:G	Chr4	65612204	A	G	0.369318	-0.22877	1.02562e-13
ENSBTAG00000014381	CRHR2	Chr4	65647997	4:65622477:A:G	Chr4	65622477	A	G	0.3125	0.596438	1.0677e-06
ENSBTAG00000038235	NOD1	Chr4	65822127	4:66328501:C:T	Chr4	66328501	C	T	0.149621	-0.387932	0.0075564
ENSBTAG00000007870	FKBP14	Chr4	66328678	4:66338599:CAT:C	Chr4	66338599	C	CAT	0.443182	0.287476	8.7929e-08
ENSBTAG00000024340	TRIL	Chr4	67204661	4:66828358:A:C	Chr4	66828358	C	A	0.306818	-0.375867	0.00904615
ENSBTAG00000019020	TAX1BP1	Chr4	68407181	4:68582243:C:G	Chr4	68582243	C	G	0.1875	-0.239017	0.00072904
ENSBTAG00000001036	HIBADH	Chr4	68473795	4:68564509:C:T	Chr4	68564509	T	C	0.49053	0.136116	3.11346e-08
ENSBTAG00000049437	CBX3	Chr4	69734069	4:69610462:T:G	Chr4	69610462	T	G	0.0814394	0.319515	0.0177268
ENSBTAG00000004136	NFE2L3	Chr4	69782790	4:69852227:G:A	Chr4	69852227	A	G	0.498106	-0.418778	1.26861e-06
ENSBTAG00000019445	C4H7orf31	Chr4	70699195	4:70694839:G:C	Chr4	70694839	G	C	0.424242	0.533548	2.21326e-19
ENSBTAG00000022613	CYCS	Chr4	70735437	4:70683050:T:C	Chr4	70683050	C	T	0.429924	-0.329759	0.000343723
ENSBTAG00000019342	OSBPL3	Chr4	70844946	4:70982269:A:T	Chr4	70982269	T	A	0.460227	-0.331534	2.50912e-14
ENSBTAG00000010609	STK31	Chr4	72031056	4:72519550:C:CA	Chr4	72519550	C	CA	0.0909091	0.529456	0.000380471
ENSBTAG00000018064	FAM221A	Chr4	72059949	4:72052157:A:C	Chr4	72052157	C	A	0.234848	-0.503472	8.2891e-05
ENSBTAG00000007136	ADAM22	Chr4	72076431	4:72121324:G:A	Chr4	72121324	G	A	0.143939	-0.566109	4.1402e-08
ENSBTAG00000032166	GTPBP10	Chr4	74533034	4:75041031:G:C	Chr4	75041031	G	C	0.215909	0.444054	0.000609697
ENSBTAG00000013226	HUS1	Chr4	74573945	4:74573975:T:C	Chr4	74573975	T	C	0.121212	-0.476528	0.00162428
ENSBTAG00000053893	NA	Chr4	76154666	4:76150982:T:A	Chr4	76150982	T	A	0.464015	0.15771	0.00412324
ENSBTAG00000009520	ADCY1	Chr4	76273756	4:76322286:T:TTGTGTG	Chr4	76322286	T	TTGTGTG	0.17803	0.568742	2.33051e-07
ENSBTAG00000020704	RAMP3	Chr4	76493685	4:75569013:A:C	Chr4	75569013	A	C	0.107955	0.314427	0.0151316
ENSBTAG00000010504	TBRG4	Chr4	76522745	4:76550975:G:A	Chr4	76550975	A	G	0.107955	0.606169	6.14694e-13
ENSBTAG00000012003	PPIA	Chr4	76713230	4:76711727:A:T	Chr4	76711727	A	T	0.327652	-0.313858	3.82148e-14
ENSBTAG00000000274	YKT6	Chr4	77129830	4:77075800:A:G	Chr4	77075800	A	G	0.159091	0.25583	0.000276322
ENSBTAG00000007796	POLM	Chr4	77228351	4:77517708:T:C	Chr4	77517708	T	C	0.121212	-0.428548	0.00681589
ENSBTAG00000013414	BLVRA	Chr4	77335575	4:77245556:A:G	Chr4	77245556	A	G	0.145833	0.724316	2.08193e-12
ENSBTAG00000012968	COA1	Chr4	77371217	4:77383965:T:G	Chr4	77383965	T	G	0.420152	0.339318	1.01948e-10
ENSBTAG00000008143	STK17A	Chr4	77515252	4:77006870:GC:G	Chr4	77006870	GC	G	0.464015	0.193608	0.00190112
ENSBTAG00000000991	MRPL32	Chr4	78126851	4:77849393:C:T	Chr4	77849393	T	C	0.265152	-0.683534	9.40273e-13
ENSBTAG00000000990	PSMA2	Chr4	78127062	4:77998355:A:AG	Chr4	77998355	AG	A	0.4375	0.195906	5.39133e-09
ENSBTAG00000009472	C4H7orf25	Chr4	78136886	4:77911850:A:C	Chr4	77911850	A	C	0.130682	-0.380385	0.00219518
ENSBTAG00000054524	NA	Chr4	78345466	4:78409287:A:T	Chr4	78409287	T	A	0.469697	0.361405	0.00198087
ENSBTAG00000010671	GLI3	Chr4	78761984	4:78943571:C:T	Chr4	78943571	C	T	0.153409	3.8573e-07	6.6603e-10
ENSBTAG00000032121	SUGCT	Chr4	80928936	4:80914498:TCAGC:T	Chr4	80914498	TCAGC	T	0.143939	0.867008	7.95353e-16
ENSBTAG00000006661	RALA	Chr4	81244481	4:80451382:T:A	Chr4	80451382	T	A	0.420455	-0.284177	0.0109058
ENSBTAG00000007305	VPS41	Chr4	81966838	4:82155101:T:C	Chr4	82155101	C	T	0.36553	-0.141771	3.0665e-10
ENSBTAG00000002859	NA	Chr4	82720174	4:83510618:C:T	Chr4	83510618	C	T	0.287879	-0.243285	0.0069312
ENSBTAG00000015337	TSPAN12	Chr4	85355349	4:85355740:TA:T	Chr4	85355740	TA	T	0.0814394	-4.97565e-07	1.41511e-07
ENSBTAG00000002938	CPED1	Chr4	85491228	4:85491017:TTACATAAGGG:T	Chr4	85491017	TTACATAAGGG	T	0.195076	-0.330763	1.1277e-11
ENSBTAG00000007976	FAM3C	Chr4	85918137	4:85952305:T:C	Chr4	85952305	C	T	0.202652	-0.327856	3.74942e-09
ENSBTAG00000012119	PTPRZ1	Chr4	86301180	4:86294701:TG:T	Chr4	86294701	TG	T	0.125	-0.356082	5.63352e-12
ENSBTAG00000013732	GPR37	Chr4	89037983	4:88829748:G:T	Chr4	88829748	G	T	0.100379	-0.145164	1.24205e-05
ENSBTAG00000013180	POT1	Chr4	89183193	4:89184787:C:T	Chr4	89184787	C	T	0.100379	0.426263	1.28659e-06
ENSBTAG00000009366	ARF5	Chr4	91819099	4:92427536:G:A	Chr4	92427536	G	A	0.244318	0.405769	0.000223213
ENSBTAG00000017001	RBM28	Chr4	92531680	4:92772801:G:A	Chr4	92772801	G	A	0.221591	0.487771	0.00573988
ENSBTAG00000000296	IMPDH1	Chr4	92586808	4:92426349:G:A	Chr4	92426349	A	G	0.0965909	-0.577624	0.0102906
ENSBTAG00000003449	KCP	Chr4	92873142	4:92514615:A:G	Chr4	92514615	A	G	0.0473485	-0.702328	0.00253513
ENSBTAG00000004989	IRF5	Chr4	92892128	4:92948102:CA:C	Chr4	92948102	CA	C	0.285985	-0.259609	0.0114802
ENSBTAG00000013287	SMO	Chr4	93108631	4:93131912:C:A	Chr4	93131912	C	A	0.333333	-0.310923	0.00153085
ENSBTAG00000007206	STRIP2	Chr4	93338889	4:93323573:GA:G	Chr4	93323573	G	GA	0.407197	-0.383262	3.80371e-20
ENSBTAG00000017223	MEST	Chr4	94250157	4:94409468:A:G	Chr4	94409468	A	G	0.092803	-0.48799	0.000732525
ENSBTAG00000017245	COPG2	Chr4	94443596	4:94441840:C:T	Chr4	94441840	C	T	0.172348	0.388289	8.99793e-16
ENSBTAG00000051746	NA	Chr4	94849947	4:95309125:A:C	Chr4	95309125	A	C	0.238636	0.475825	0.000462554
ENSBTAG00000010437	MKLN1	Chr4	95025993	4:94384484:C:T	Chr4	94384484	C	T	0.191288	-0.183565	1.34345e-07
ENSBTAG00000014543	PLXNA4	Chr4	95958170	4:96107336:T:G	Chr4	96107336	T	G	0.160985	-0.236737	0.00368323
ENSBTAG00000049946	NA	Chr4	96270788	4:96116818:C:A	Chr4	96116818	C	A	0.168561	-0.315126	0.00562502
ENSBTAG00000014112	EXOC4	Chr4	96940093	4:97022640:G:C	Chr4	97022640	G	C	0.363636	0.423529	3.93346e-06
ENSBTAG00000009902	AKR1B1	Chr4	98132148	4:98090031:C:T	Chr4	98090031	T	C	0.361742	-0.318893	0.0125899
ENSBTAG00000001582	AKR1B10	Chr4	98217456	4:98221557:T:TGGACAGTGACTGCA	Chr4	98221557	TGGACAGTGACTGCA	T	0.24053	0.311125	1.90688e-13
ENSBTAG00000008895	BPGM	Chr4	98321780	4:98418500:A:G	Chr4	98418500	A	G	0.225379	-0.404424	0.000588489
ENSBTAG00000001773	CYREN	Chr4	98814946	4:98846375:C:CAG	Chr4	98846375	C	CAG	0.416667	0.257948	0.0107469
ENSBTAG00000017905	WDR91	Chr4	98849268	4:98853762:C:CA	Chr4	98853762	C	CA	0.138258	-0.32403	0.00105173
ENSBTAG00000031548	NA	Chr4	98969970	4:98946233:T:C	Chr4	98946233	C	T	0.456439	0.213067	1.79953e-16
ENSBTAG00000047605	NA	Chr4	99055474	4:100014704:G:T	Chr4	100014704	G	T	0.382576	-3.74007e-07	3.38339e-11
ENSBTAG00000054978	NA	Chr4	99088132	4:99126346:G:GA	Chr4	99126346	GA	G	0.427757	-0.385831	8.90003e-12
ENSBTAG00000047088	NA	Chr4	99135175	4:99156288:G:A	Chr4	99156288	A	G	0.181818	-0.71882	1.2608e-16
ENSBTAG00000011127	NUP205	Chr4	99335498	4:99465153:A:C	Chr4	99465153	A	C	0.494318	-0.242305	0.0011691
ENSBTAG00000017427	FAM180A	Chr4	99546135	4:99607785:T:A	Chr4	99607785	T	A	0.187747	0.636871	2.91534e-09
ENSBTAG00000007806	MTPN	Chr4	99827165	4:99816636:G:A	Chr4	99816636	G	A	0.138258	0.42367	1.09326e-11
ENSBTAG00000014674	CHRM2	Chr4	100752929	4:100649723:T:C	Chr4	100649723	T	C	0.231061	-0.462708	9.08693e-05
ENSBTAG00000002317	PTN	Chr4	100995239	4:101110964:T:C	Chr4	101110964	C	T	0.244318	0.108438	1.05309e-05
ENSBTAG00000015802	CREB3L2	Chr4	101729511	4:100799818:C:A	Chr4	100799818	C	A	0.0454545	-0.791066	0.0183774
ENSBTAG00000004263	ATP6V0A4	Chr4	102436384	4:102534719:A:G	Chr4	102534719	A	G	0.488636	-0.411341	3.34984e-05
ENSBTAG00000021073	KIAA1549	Chr4	102614462	4:102598602:G:A	Chr4	102598602	G	A	0.373106	0.322248	8.17856e-10
ENSBTAG00000014250	ZC3HAV1L	Chr4	102653875	4:102603325:T:C	Chr4	102603325	T	C	0.406844	0.526386	1.82778e-05
ENSBTAG00000017770	NA	Chr4	102906444	4:102704032:T:C	Chr4	102704032	T	C	0.293561	-0.355564	0.0136917
ENSBTAG00000017860	HIPK2	Chr4	103242618	4:103276526:G:A	Chr4	103276526	A	G	0.323864	0.149148	0.00222741
ENSBTAG00000016546	PARP12	Chr4	103519158	4:102689834:G:A	Chr4	102689834	A	G	0.316288	0.285387	0.000220108
ENSBTAG00000003495	KDM7A	Chr4	103604495	4:104479517:G:A	Chr4	104479517	G	A	0.140152	-0.381651	0.00085861
ENSBTAG00000012239	SLC37A3	Chr4	103796965	4:103415622:T:C	Chr4	103415622	T	C	0.123106	-0.313824	0.000942618
ENSBTAG00000021761	BRAF	Chr4	104194547	4:103658650:AT:A	Chr4	103658650	AT	A	0.484848	0.227657	0.00557097
ENSBTAG00000005285	MRPS33	Chr4	104273391	4:104291950:T:C	Chr4	104291950	C	T	0.346591	0.426718	2.98393e-11
ENSBTAG00000051724	NA	Chr4	104316588	4:104291950:T:C	Chr4	104291950	C	T	0.346591	0.452264	1.75236e-15
ENSBTAG00000053379	NA	Chr4	104691699	4:104290125:T:C	Chr4	104290125	C	T	0.346591	0.332693	7.44208e-17
ENSBTAG00000019265	AGK	Chr4	104801729	4:104844200:C:A	Chr4	104844200	C	A	0.0795455	-0.697679	1.8654e-05
ENSBTAG00000016879	DENND11	Chr4	104960261	4:104927486:C:CAA	Chr4	104927486	C	CAA	0.344697	0.316222	5.07979e-11
ENSBTAG00000020453	CLEC5A	Chr4	105231958	4:105287864:T:C	Chr4	105287864	T	C	0.295455	-0.270257	0.0154918
ENSBTAG00000046152	MGAM	Chr4	105285316	4:105296586:A:G	Chr4	105296586	A	G	0.166667	-0.286084	5.13238e-06
ENSBTAG00000031236	NA	Chr4	105513813	4:105578635:T:G	Chr4	105578635	T	G	0.0416667	0.801817	0.000434861
ENSBTAG00000053109	NA	Chr4	105701550	4:105788070:G:A	Chr4	105788070	G	A	0.219697	0.441384	5.52845e-06
ENSBTAG00000053458	NA	Chr4	105738229	4:106026328:C:T	Chr4	106026328	T	C	0.44697	0.423884	4.02144e-06
ENSBTAG00000027204	NA	Chr4	106102214	4:105375212:CTACTT:C	Chr4	105375212	C	CTACTT	0.498099	-0.304012	0.000208647
ENSBTAG00000024219	TRPV6	Chr4	106197865	4:106184510:GTC:G	Chr4	106184510	G	GTC	0.0852273	-0.847713	0.0172847
ENSBTAG00000014533	KEL	Chr4	106278917	4:106297490:G:A	Chr4	106297490	A	G	0.403409	0.445454	2.92111e-09
ENSBTAG00000009839	GSTK1	Chr4	106651015	4:105764357:T:C	Chr4	105764357	T	C	0.397727	-0.233897	0.00272853
ENSBTAG00000018159	CASP2	Chr4	106677711	4:106638727:A:G	Chr4	106638727	G	A	0.304924	-0.246168	2.57905e-05
ENSBTAG00000006359	EPHA1	Chr4	106804335	4:107121397:C:T	Chr4	107121397	C	T	0.236742	0.267037	2.38987e-08
ENSBTAG00000005475	TCAF2	Chr4	107001714	4:107133999:C:A	Chr4	107133999	C	A	0.376894	-0.454895	7.04708e-09
ENSBTAG00000002554	TCAF1	Chr4	107070624	4:107100360:G:T	Chr4	107100360	G	T	0.166667	0.193381	1.30063e-07
ENSBTAG00000001815	ARHGEF5	Chr4	107620190	4:107603276:C:CCG	Chr4	107603276	C	CCG	0.25	-0.283975	1.90209e-05
ENSBTAG00000017676	TPK1	Chr4	108101163	4:108101137:C:G	Chr4	108101137	G	C	0.272727	0.379127	0.00499125
ENSBTAG00000008736	CUL1	Chr4	111931202	4:111409542:G:A	Chr4	111409542	A	G	0.376894	-0.400841	0.00015719
ENSBTAG00000043936	Y_RNA	Chr4	112140340	4:112138169:C:T	Chr4	112138169	C	T	0.486742	-0.371798	1.5986e-08
ENSBTAG00000043461	Y_RNA	Chr4	112179861	4:112533489:C:T	Chr4	112533489	C	T	0.0833333	-0.584865	5.26305e-07
ENSBTAG00000014768	ZNF786	Chr4	112243363	4:112269619:G:GTTGCTGAAGCGCCCTGCTCTTACTTCATGGAGGTGGCAGTTGGTGGGCCTCTCCTCTCC	Chr4	112269619	GTTGCTGAAGCGCCCTGCTCTTACTTCATGGAGGTGGCAGTTGGTGGGCCTCTCCTCTCC	G	0.462121	0.376171	3.6132e-18
ENSBTAG00000002445	NA	Chr4	112350446	4:112293755:A:G	Chr4	112293755	A	G	0.195076	-0.675918	5.8352e-05
ENSBTAG00000010219	KRBA1	Chr4	112569851	4:112139850:C:CCCGGGTTAGAGCGCGCGGT	Chr4	112139850	C	CCCGGGTTAGAGCGCGCGGT	0.392045	-0.288883	0.00272628
ENSBTAG00000039594	ZNF862	Chr4	112681947	4:112687610:C:T	Chr4	112687610	C	T	0.407197	-0.351688	1.94887e-11
ENSBTAG00000006022	ATP6V0E2	Chr4	112715025	4:112689240:G:A	Chr4	112689240	G	A	0.314394	-0.473399	6.3122e-09
ENSBTAG00000031059	LRRC61	Chr4	112737746	4:112744942:C:T	Chr4	112744942	C	T	0.3125	1.87689e-07	3.80419e-21
ENSBTAG00000004215	RARRES2	Chr4	112753172	4:112422248:A:G	Chr4	112422248	A	G	0.0473485	-0.440987	0.000711575
ENSBTAG00000038241	REPIN1	Chr4	112782528	4:112788723:G:T	Chr4	112788723	T	G	0.24053	2.1938e-07	8.60905e-08
ENSBTAG00000007983	ZNF775	Chr4	112791823	4:112839885:G:T	Chr4	112839885	T	G	0.454545	0.177515	1.05329e-10
ENSBTAG00000053931	NA	Chr4	112818865	4:112761265:A:C	Chr4	112761265	A	C	0.327652	0.332591	7.19716e-07
ENSBTAG00000014402	GIMAP8	Chr4	112850271	4:112839895:A:C	Chr4	112839895	A	C	0.318182	2.63059e-07	6.54416e-11
ENSBTAG00000009850	GIMAP7	Chr4	112898194	4:113294827:T:C	Chr4	113294827	C	T	0.242424	0.562289	4.29796e-12
ENSBTAG00000039588	NA	Chr4	112945712	4:112771221:A:C	Chr4	112771221	A	C	0.202652	0.454427	8.81181e-07
ENSBTAG00000046257	GIMAP4	Chr4	113074368	4:112839895:A:C	Chr4	112839895	A	C	0.318182	0.195216	2.59225e-18
ENSBTAG00000030940	GIMAP7	Chr4	113120508	4:112956229:TA:T	Chr4	112956229	T	TA	0.395833	-0.253797	0.000343549
ENSBTAG00000040331	NA	Chr4	113139056	4:113211968:T:TA	Chr4	113211968	T	TA	0.304924	0.341422	6.65532e-05
ENSBTAG00000011240	NA	Chr4	113192317	4:112989035:AT:A	Chr4	112989035	AT	A	0.337121	6.81525e-07	1.89967e-08
ENSBTAG00000054649	NA	Chr4	113233117	4:112839895:A:C	Chr4	112839895	A	C	0.318182	5.00658e-07	4.82818e-16
ENSBTAG00000050052	NA	Chr4	113268350	4:112861908:G:A	Chr4	112861908	G	A	0.128788	0.372633	7.52852e-15
ENSBTAG00000008550	GIMAP7	Chr4	113276470	4:113419970:ATGGTATTTTC:A	Chr4	113419970	A	ATGGTATTTTC	0.471591	-0.224471	4.30704e-06
ENSBTAG00000037510	NA	Chr4	113314341	4:113298139:A:G	Chr4	113298139	G	A	0.244318	0.296375	0.0183016
ENSBTAG00000012078	TMEM176A	Chr4	113407643	4:113355455:A:ACATC	Chr4	113355455	ACATC	A	0.223485	-4.0117e-07	3.13351e-06
ENSBTAG00000016766	TMEM176B	Chr4	113408319	4:113355455:A:ACATC	Chr4	113355455	ACATC	A	0.223485	-0.181514	3.30238e-08
ENSBTAG00000005419	AOC1	Chr4	113450548	4:113450691:T:C	Chr4	113450691	T	C	0.371212	0.411253	1.92174e-07
ENSBTAG00000011226	SLC4A2	Chr4	113636353	4:114158377:C:A	Chr4	114158377	A	C	0.448864	0.192456	0.0045935
ENSBTAG00000011229	TMUB1	Chr4	113658879	4:113659687:G:A	Chr4	113659687	G	A	0.251894	-0.368941	0.00123444
ENSBTAG00000000607	ABCF2	Chr4	113803468	4:113792522:T:C	Chr4	113792522	T	C	0.352273	-0.314969	0.000225665
ENSBTAG00000014372	SMARCD3	Chr4	113848095	4:113847335:C:T	Chr4	113847335	C	T	0.482955	-0.313781	0.00611279
ENSBTAG00000004540	NUB1	Chr4	113890452	4:113886167:G:C	Chr4	113886167	G	C	0.342803	0.46974	2.40616e-08
ENSBTAG00000006232	WDR86	Chr4	113956890	4:113954439:C:T	Chr4	113954439	C	T	0.128788	0.343835	0.000287161
ENSBTAG00000021260	GALNT11	Chr4	114567410	4:114589049:C:A	Chr4	114589049	C	A	0.393939	-0.24282	9.20483e-11
ENSBTAG00000030897	XRCC2	Chr4	115054271	4:115050580:A:AATC	Chr4	115050580	AATC	A	0.44697	0.875901	1.7507e-20
ENSBTAG00000052920	NA	Chr4	118085293	4:118073209:C:T	Chr4	118073209	C	T	0.0416667	1.14959	0.00395457
ENSBTAG00000020335	RNF32	Chr4	118112315	4:118457996:C:A	Chr4	118457996	C	A	0.265152	-0.106079	0.00422432
ENSBTAG00000030817	LMBR1	Chr4	118297036	4:117768931:G:C	Chr4	117768931	G	C	0.11553	0.622663	0.00487281
ENSBTAG00000016435	NOM1	Chr4	118348695	4:118361042:G:C	Chr4	118361042	G	C	0.11553	-0.487408	0.00212909
ENSBTAG00000008025	UBE3C	Chr4	118465390	4:118510443:A:G	Chr4	118510443	A	G	0.267045	-0.177234	0.00967591
ENSBTAG00000000771	DNAJB6	Chr4	118628471	4:119310420:A:G	Chr4	119310420	A	G	0.149621	-0.622378	0.00287302
ENSBTAG00000004958	PTPRN2	Chr4	119258101	4:119531497:G:A	Chr4	119531497	A	G	0.424242	-0.499043	0.00240163
ENSBTAG00000005483	ESYT2	Chr4	119508052	4:119666069:GA:G	Chr4	119666069	GA	G	0.0700758	0.253674	3.55102e-09
ENSBTAG00000024157	DYNC2I1	Chr4	119527578	4:119073837:C:T	Chr4	119073837	T	C	0.257576	-0.250153	0.0136257
ENSBTAG00000037649	VIPR2	Chr4	119695643	4:119627616:G:T	Chr4	119627616	G	T	0.166667	0.386139	0.0129065
ENSBTAG00000012272	TMEM19	Chr5	1319438	5:1602009:G:A	Chr5	1602009	A	G	0.306818	-0.202892	5.63804e-06
ENSBTAG00000053598	RAB21	Chr5	1377717	5:1436717:G:A	Chr5	1436717	A	G	0.215909	-0.421885	9.95572e-08
ENSBTAG00000018575	TRHDE	Chr5	1921650	5:2892747:C:T	Chr5	2892747	C	T	0.094697	-0.388934	0.000627321
ENSBTAG00000035083	ATXN7L3B	Chr5	4068536	5:4048484:T:A	Chr5	4048484	T	A	0.313688	-0.0854707	0.000806095
ENSBTAG00000011590	GLIPR1	Chr5	4987629	5:5136924:A:G	Chr5	5136924	A	G	0.130682	-0.385881	0.0031549
ENSBTAG00000011591	KRR1	Chr5	5047918	5:5533394:G:A	Chr5	5533394	A	G	0.356061	-0.244505	0.00900499
ENSBTAG00000050623	NA	Chr5	5192249	5:5198612:T:C	Chr5	5198612	C	T	0.183712	-0.741595	1.74585e-20
ENSBTAG00000034985	PHLDA1	Chr5	5575874	5:5256356:T:C	Chr5	5256356	C	T	0.1875	0.261784	0.00760133
ENSBTAG00000050467	BBS10	Chr5	5831861	5:6666723:G:A	Chr5	6666723	A	G	0.162879	0.318955	0.0110769
ENSBTAG00000013406	CSRP2	Chr5	6300975	5:6293797:G:A	Chr5	6293797	A	G	0.38447	-0.557122	1.01093e-13
ENSBTAG00000009852	NAV3	Chr5	7300923	5:7202842:A:G	Chr5	7202842	A	G	0.125	-0.717161	6.69321e-12
ENSBTAG00000011336	OTOGL	Chr5	9754284	5:9797776:T:C	Chr5	9797776	C	T	0.214015	-0.289664	1.60593e-05
ENSBTAG00000002888	TMTC2	Chr5	12219075	5:12299699:T:C	Chr5	12299699	C	T	0.426136	0.404553	6.66848e-13
ENSBTAG00000005305	NTS	Chr5	15532030	5:15071050:A:G	Chr5	15071050	A	G	0.123106	0.576161	8.84353e-07
ENSBTAG00000018743	C5H12orf29	Chr5	17826549	5:17929234:A:G	Chr5	17929234	G	A	0.426136	0.164608	0.00400008
ENSBTAG00000009023	TMTC3	Chr5	17943911	5:17714364:T:G	Chr5	17714364	G	T	0.257576	-0.214297	0.0136664
ENSBTAG00000017549	KITLG	Chr5	18353485	5:18213133:G:T	Chr5	18213133	G	T	0.280303	0.106667	2.50683e-05
ENSBTAG00000003505	DCN	Chr5	21053400	5:21182749:G:A	Chr5	21182749	G	A	0.0549242	0.405269	0.0052729
ENSBTAG00000007447	NUDT4	Chr5	23191703	5:22424050:G:T	Chr5	22424050	G	T	0.126894	-0.508867	2.91159e-10
ENSBTAG00000049886	NA	Chr5	23702986	5:23712133:A:G	Chr5	23712133	G	A	0.433712	-4.26412e-07	1.01778e-14
ENSBTAG00000004484	CEP83	Chr5	24345243	5:24620218:A:G	Chr5	24620218	A	G	0.304924	-0.336371	0.00229057
ENSBTAG00000014375	TMCC3	Chr5	24595494	5:24452665:A:G	Chr5	24452665	G	A	0.251894	-0.313156	0.0171741
ENSBTAG00000017729	NR2C1	Chr5	24760106	5:24853407:C:A	Chr5	24853407	C	A	0.410985	0.352899	0.000124938
ENSBTAG00000014044	VEZT	Chr5	24868909	5:24972773:G:A	Chr5	24972773	A	G	0.414773	0.245153	0.000553049
ENSBTAG00000010907	PPP1R1A	Chr5	25506717	5:25521880:G:A	Chr5	25521880	G	A	0.359848	-0.469168	2.02355e-14
ENSBTAG00000004337	PDE1B	Chr5	25542997	5:25427273:A:G	Chr5	25427273	A	G	0.172348	0.758058	1.29338e-16
ENSBTAG00000019686	NCKAP1L	Chr5	25592783	5:25625597:T:G	Chr5	25625597	G	T	0.367424	0.124747	4.06367e-05
ENSBTAG00000005384	COPZ1	Chr5	25742083	5:25686216:C:G	Chr5	25686216	C	G	0.325758	-0.29077	0.000114685
ENSBTAG00000021974	SMUG1	Chr5	25855723	5:25688702:GTAAT:G	Chr5	25688702	G	GTAAT	0.0814394	-0.683178	0.0131698
ENSBTAG00000020177	MYG1	Chr5	26724410	5:26374475:C:A	Chr5	26374475	A	C	0.181818	0.596563	9.95113e-09
ENSBTAG00000008935	PFDN5	Chr5	26729058	5:27139405:A:G	Chr5	27139405	A	G	0.407197	1.80366e-07	0.00200101
ENSBTAG00000007829	CSAD	Chr5	26821654	5:25838206:T:C	Chr5	25838206	T	C	0.232955	-0.216894	0.000725052
ENSBTAG00000005623	SOAT2	Chr5	26877858	5:26914495:G:C	Chr5	26914495	G	C	0.221591	-0.104311	0.00563093
ENSBTAG00000006904	TNS2	Chr5	26921895	5:26843945:C:CT	Chr5	26843945	C	CT	0.138258	-0.315561	1.40586e-17
ENSBTAG00000006883	EIF4B	Chr5	26949409	5:27296966:T:C	Chr5	27296966	T	C	0.147727	0.275389	1.16297e-06
ENSBTAG00000001517	KRT18	Chr5	27002595	5:26543332:G:GT	Chr5	26543332	G	GT	0.151515	0.282532	0.000240701
ENSBTAG00000000836	KRT8	Chr5	27039438	5:27066122:G:A	Chr5	27066122	A	G	0.274621	-0.199003	0.00483077
ENSBTAG00000013843	ACVRL1	Chr5	27957768	5:28140997:A:G	Chr5	28140997	G	A	0.153409	-0.283763	0.00607094
ENSBTAG00000001983	SMAGP	Chr5	28521681	5:28696960:A:G	Chr5	28696960	G	A	0.407197	0.229037	0.00444907
ENSBTAG00000004349	DAZAP2	Chr5	28552009	5:28453241:C:T	Chr5	28453241	C	T	0.361742	0.36946	0.000350406
ENSBTAG00000010924	LETMD1	Chr5	28695321	5:29007547:T:A	Chr5	29007547	T	A	0.155303	-0.459051	0.00801402
ENSBTAG00000049198	NA	Chr5	28782614	5:29099969:C:A	Chr5	29099969	A	C	0.0662879	1.18289e-08	0.0106651
ENSBTAG00000032902	NA	Chr5	28846447	5:28841440:C:T	Chr5	28841440	C	T	0.132576	0.3504	9.60167e-07
ENSBTAG00000025005	METTL7A	Chr5	29007097	5:28995646:G:A	Chr5	28995646	A	G	0.102273	6.60714e-07	6.96008e-07
ENSBTAG00000017164	LARP4	Chr5	29503457	5:28609439:G:GA	Chr5	28609439	G	GA	0.0890151	0.347236	0.000211374
ENSBTAG00000012342	LIMA1	Chr5	29637177	5:30001619:T:C	Chr5	30001619	T	C	0.373106	0.274747	0.00533272
ENSBTAG00000037935	SMARCD1	Chr5	29810207	5:30736668:C:T	Chr5	30736668	C	T	0.215909	0.427392	2.80533e-05
ENSBTAG00000012784	RACGAP1	Chr5	29851714	5:29676573:CT:C	Chr5	29676573	C	CT	0.125	-0.272859	0.000266515
ENSBTAG00000017781	BCDIN3D	Chr5	30042065	5:29302496:C:T	Chr5	29302496	C	T	0.24053	0.427946	0.0103426
ENSBTAG00000019281	MCRS1	Chr5	30264980	5:30282818:G:A	Chr5	30282818	G	A	0.431818	-0.365509	0.000386194
ENSBTAG00000004660	SPATS2	Chr5	30378369	5:30420246:C:A	Chr5	30420246	A	C	0.429924	0.170266	1.57792e-05
ENSBTAG00000016398	DNAJC22	Chr5	30474172	5:30482819:C:G	Chr5	30482819	G	C	0.348485	0.474102	1.53728e-09
ENSBTAG00000039992	TUBA1C	Chr5	30572546	5:30600601:T:G	Chr5	30600601	G	T	0.475379	-0.688391	4.27813e-19
ENSBTAG00000001489	TUBA1A	Chr5	30656036	5:29677384:G:A	Chr5	29677384	G	A	0.329545	0.27871	0.0046987
ENSBTAG00000012244	TUBA1B	Chr5	30699221	5:30865667:G:A	Chr5	30865667	G	A	0.0568182	0.586654	0.011631
ENSBTAG00000044048	LMBR1L	Chr5	30713731	5:30266399:G:A	Chr5	30266399	G	A	0.0530303	0.995687	6.70702e-07
ENSBTAG00000000124	DHH	Chr5	30728409	5:30718000:A:T	Chr5	30718000	A	T	0.479167	-0.207958	0.00956979
ENSBTAG00000021808	CACNB3	Chr5	30962180	5:31109022:C:T	Chr5	31109022	T	C	0.392045	-0.17149	2.58372e-15
ENSBTAG00000042536	SNORA2C	Chr5	31116772	5:31094718:A:T	Chr5	31094718	A	T	0.0492424	0.72156	4.13763e-06
ENSBTAG00000000454	TMEM106C	Chr5	32323859	5:32323774:C:G	Chr5	32323774	C	G	0.15019	-0.729278	3.97185e-15
ENSBTAG00000018690	RPAP3	Chr5	32579245	5:32417727:T:C	Chr5	32417727	T	C	0.138258	0.310378	0.00377231
ENSBTAG00000002902	ANO6	Chr5	35016323	5:35025104:G:A	Chr5	35025104	G	A	0.244318	-0.487632	4.02153e-07
ENSBTAG00000021105	IRAK4	Chr5	36708918	5:36183326:C:T	Chr5	36183326	C	T	0.392045	0.204613	0.0114154
ENSBTAG00000004718	PUS7L	Chr5	36712230	5:36630857:ATT:A	Chr5	36630857	ATT	A	0.253788	-0.418617	0.000312552
ENSBTAG00000015024	GXYLT1	Chr5	38545506	5:38556493:C:A	Chr5	38556493	A	C	0.132576	0.504987	6.97354e-05
ENSBTAG00000020679	CNTN1	Chr5	40037754	5:40125297:T:C	Chr5	40125297	T	C	0.282197	0.483702	2.41466e-15
ENSBTAG00000004832	KIF21A	Chr5	41732671	5:41883448:T:C	Chr5	41883448	T	C	0.412879	0.37942	7.61086e-05
ENSBTAG00000015311	PTPRR	Chr5	42611539	5:42404078:T:A	Chr5	42404078	A	T	0.0795454	0.526399	0.00484594
ENSBTAG00000003749	KCNMB4	Chr5	43120159	5:43089456:C:T	Chr5	43089456	C	T	0.26616	0.109146	7.03424e-09
ENSBTAG00000019156	CCT2	Chr5	43884991	5:43142324:C:A	Chr5	43142324	A	C	0.272727	0.0933962	0.000405167
ENSBTAG00000002256	YEATS4	Chr5	44110850	5:43417192:A:G	Chr5	43417192	G	A	0.130682	-0.357112	0.00898634
ENSBTAG00000026779	LYZ	Chr5	44515796	5:44490792:T:C	Chr5	44490792	T	C	0.291667	0.242345	3.32461e-05
ENSBTAG00000013496	CPM	Chr5	44876589	5:44744056:C:A	Chr5	44744056	C	A	0.416667	-0.347913	0.00107164
ENSBTAG00000031919	SLC35E3	Chr5	45065127	5:45215494:A:G	Chr5	45215494	G	A	0.282197	-0.251603	3.19107e-05
ENSBTAG00000019738	MDM1	Chr5	45446654	5:45548216:G:T	Chr5	45548216	G	T	0.179924	0.591531	1.40208e-06
ENSBTAG00000007256	DYRK2	Chr5	46131988	5:46150838:C:T	Chr5	46150838	T	C	0.128788	0.544397	0.00246261
ENSBTAG00000009939	CAND1	Chr5	46529168	5:46851917:T:C	Chr5	46851917	T	C	0.0700758	-0.254371	0.0115123
ENSBTAG00000033726	GRIP1	Chr5	47140112	5:46800522:T:C	Chr5	46800522	C	T	0.339015	-0.422728	7.73603e-09
ENSBTAG00000020806	HELB	Chr5	47519482	5:47521765:T:A	Chr5	47521765	T	A	0.475379	0.409689	2.38108e-15
ENSBTAG00000002004	LLPH	Chr5	47669191	5:47633463:GCTT:G	Chr5	47633463	GCTT	G	0.0909091	1.09471	4.24839e-07
ENSBTAG00000044017	MSRB3	Chr5	48512740	5:48466860:T:C	Chr5	48466860	C	T	0.386364	-0.215289	0.00721576
ENSBTAG00000014758	WIF1	Chr5	48687579	5:48779723:A:T	Chr5	48779723	A	T	0.456439	0.350359	7.67447e-07
ENSBTAG00000011352	TBC1D30	Chr5	49035846	5:49035147:C:CAAG	Chr5	49035147	C	CAAG	0.284091	-0.277908	5.29105e-06
ENSBTAG00000017465	GNS	Chr5	49053813	5:49083213:GCC:G	Chr5	49083213	GCC	G	0.0814978	0.215158	0.00405998
ENSBTAG00000026962	XPOT	Chr5	49468018	5:49211471:T:G	Chr5	49211471	T	G	0.3125	-0.166526	0.00011217
ENSBTAG00000004753	RXYLT1	Chr5	49945730	5:49847151:C:G	Chr5	49847151	C	G	0.274621	0.288066	0.0154196
ENSBTAG00000007175	AVPR1A	Chr5	50362883	5:50352285:G:A	Chr5	50352285	A	G	0.331439	-0.367244	1.17159e-11
ENSBTAG00000011857	PPM1H	Chr5	50634074	5:50627463:TA:T	Chr5	50627463	TA	T	0.0719697	0.350335	0.00170307
ENSBTAG00000011068	MON2	Chr5	51105717	5:51083858:A:C	Chr5	51083858	C	A	0.210227	0.32419	2.70741e-15
ENSBTAG00000010428	USP15	Chr5	51276079	5:51366308:C:T	Chr5	51366308	C	T	0.412879	0.321229	1.49223e-08
ENSBTAG00000021287	SLC16A7	Chr5	53892992	5:53892941:T:C	Chr5	53892941	C	T	0.494297	0.357933	1.74671e-16
ENSBTAG00000017543	ATP23	Chr5	55539039	5:56187653:TA:T	Chr5	56187653	TA	T	0.24053	0.293171	5.10136e-05
ENSBTAG00000016908	METTL1	Chr5	55693580	5:55695114:G:A	Chr5	55695114	G	A	0.0681818	-0.367421	0.00237863
ENSBTAG00000004494	B4GALNT1	Chr5	55856908	5:55504974:C:G	Chr5	55504974	C	G	0.106061	-0.449071	1.50502e-06
ENSBTAG00000019084	INHBC	Chr5	56022178	5:55955109:C:T	Chr5	55955109	C	T	0.225379	-0.192583	6.17783e-13
ENSBTAG00000014655	MYO1A	Chr5	56378742	5:56403400:A:T	Chr5	56403400	T	A	0.168561	-0.691421	5.00524e-11
ENSBTAG00000001392	RDH16	Chr5	56531476	5:56917241:C:G	Chr5	56917241	C	G	0.0587121	-0.162279	1.59032e-05
ENSBTAG00000013443	SDR9C7	Chr5	56545370	5:56861389:A:G	Chr5	56861389	A	G	0.429924	0.408689	0.00391844
ENSBTAG00000051761	NA	Chr5	56614396	5:56600530:T:G	Chr5	56600530	T	G	0.092803	-0.323605	1.6119e-07
ENSBTAG00000011720	HSD17B6	Chr5	56696104	5:56698195:C:T	Chr5	56698195	C	T	0.0227273	-0.776994	3.33218e-12
ENSBTAG00000017830	RBMS2	Chr5	56890516	5:56894369:T:C	Chr5	56894369	T	C	0.280303	-0.257556	0.0013401
ENSBTAG00000009284	GLS2	Chr5	56910795	5:56951934:T:C	Chr5	56951934	T	C	0.261364	0.157684	0.00426073
ENSBTAG00000009281	SPRYD4	Chr5	56925355	5:56767567:G:A	Chr5	56767567	A	G	0.422348	-0.166868	0.00940063
ENSBTAG00000002799	SLC39A5	Chr5	57097226	5:57093462:G:A	Chr5	57093462	G	A	0.422053	0.175065	9.69659e-10
ENSBTAG00000009543	ESYT1	Chr5	57194004	5:57167697:CG:C	Chr5	57167697	CG	C	0.0909091	-0.301516	0.00017293
ENSBTAG00000009542	ZC3H10	Chr5	57205232	5:57205212:G:C	Chr5	57205212	G	C	0.094697	-0.315947	0.00769704
ENSBTAG00000010444	ERBB3	Chr5	57236737	5:57612266:C:T	Chr5	57612266	C	T	0.0340909	0.311843	1.12166e-05
ENSBTAG00000038896	RPS26	Chr5	57283196	5:57299479:C:T	Chr5	57299479	T	C	0.0416667	-0.484882	0.0182484
ENSBTAG00000006160	SUOX	Chr5	57319225	5:57269031:T:G	Chr5	57269031	G	T	0.340909	-0.218022	0.00540783
ENSBTAG00000011931	CD63	Chr5	57528944	5:57437923:T:TG	Chr5	57437923	T	TG	0.026616	0.170559	0.000201986
ENSBTAG00000011927	RDH5	Chr5	57537461	5:57328477:A:G	Chr5	57328477	A	G	0.19697	-0.461033	0.000231196
ENSBTAG00000003183	NTN4	Chr5	60161682	5:60038171:T:A	Chr5	60038171	T	A	0.284091	-0.262117	0.00146944
ENSBTAG00000016271	SNRPF	Chr5	60214477	5:60204768:G:T	Chr5	60204768	G	T	0.166667	0.283415	0.000347118
ENSBTAG00000016274	CCDC38	Chr5	60248210	5:60107762:C:T	Chr5	60107762	C	T	0.0246212	2.13817	5.80208e-08
ENSBTAG00000016275	AMDHD1	Chr5	60255972	5:61162465:T:C	Chr5	61162465	T	C	0.297348	-0.235859	1.11021e-06
ENSBTAG00000016276	HAL	Chr5	60299590	5:60315883:A:C	Chr5	60315883	C	A	0.335227	0.149804	1.11578e-07
ENSBTAG00000015792	CFAP54	Chr5	60796780	5:60382162:C:A	Chr5	60382162	C	A	0.392045	-0.514368	1.67637e-18
ENSBTAG00000001894	NEDD1	Chr5	61105020	5:60382162:C:A	Chr5	60382162	C	A	0.392045	-0.466308	9.66408e-09
ENSBTAG00000004240	TMPO	Chr5	62686937	5:62718136:A:ATGTTT	Chr5	62718136	ATGTTT	A	0.363636	-0.213931	0.000548528
ENSBTAG00000021660	IKBIP	Chr5	62781346	5:62949997:A:G	Chr5	62949997	A	G	0.268939	0.408636	0.000231365
ENSBTAG00000006040	UHRF1BP1L	Chr5	64165062	5:64165063:G:A	Chr5	64165063	G	A	0.25947	-0.247429	1.25047e-08
ENSBTAG00000013859	SCYL2	Chr5	64220437	5:64235736:TA:T	Chr5	64235736	T	TA	0.460227	-0.499028	8.91553e-13
ENSBTAG00000013596	NR1H4	Chr5	64396367	5:63565729:GA:G	Chr5	63565729	GA	G	0.289773	-0.228757	0.0195652
ENSBTAG00000003239	UTP20	Chr5	65183369	5:65320615:A:AT	Chr5	65320615	AT	A	0.388258	-0.188028	2.59598e-05
ENSBTAG00000002490	CHPT1	Chr5	65511776	5:65522782:C:CA	Chr5	65522782	CA	C	0.333333	0.212279	5.05279e-10
ENSBTAG00000019409	GNPTAB	Chr5	65655965	5:66315160:G:C	Chr5	66315160	G	C	0.270833	-0.281033	0.000542274
ENSBTAG00000017287	DRAM1	Chr5	65703175	5:65944091:G:A	Chr5	65944091	G	A	0.32197	0.177098	0.00052993
ENSBTAG00000006013	NT5DC3	Chr5	67511409	5:67466906:T:C	Chr5	67466906	C	T	0.189394	-0.380435	6.08186e-14
ENSBTAG00000027899	NA	Chr5	67590364	5:67584514:A:G	Chr5	67584514	A	G	0.356061	0.23018	1.06058e-19
ENSBTAG00000020933	HCFC2	Chr5	67711300	5:67976347:C:T	Chr5	67976347	C	T	0.142045	-0.384123	0.0111477
ENSBTAG00000030744	NFYB	Chr5	67787287	5:68268913:G:A	Chr5	68268913	G	A	0.126894	0.385127	0.002527
ENSBTAG00000013912	TXNRD1	Chr5	67898939	5:67959632:G:A	Chr5	67959632	G	A	0.119318	-0.277546	0.000685865
ENSBTAG00000021875	SLC41A2	Chr5	68504478	5:68990272:A:G	Chr5	68990272	A	G	0.206439	-0.212796	8.89033e-07
ENSBTAG00000021196	NOPCHAP1	Chr5	68528022	5:68522195:C:T	Chr5	68522195	C	T	0.316288	-3.94134e-07	2.3041e-09
ENSBTAG00000033735	WASHC4	Chr5	68640525	5:68643199:T:A	Chr5	68643199	T	A	0.0852273	0.845327	4.20789e-06
ENSBTAG00000030784	APPL2	Chr5	68753242	5:68552771:T:C	Chr5	68552771	T	C	0.236742	-0.238971	6.562e-07
ENSBTAG00000010457	NUAK1	Chr5	69552137	5:69322414:A:ATGC	Chr5	69322414	A	ATGC	0.337121	0.221387	0.00262966
ENSBTAG00000011913	CKAP4	Chr5	69639265	5:69636955:C:G	Chr5	69636955	C	G	0.486742	-0.147306	1.60161e-15
ENSBTAG00000004781	POLR3B	Chr5	69721990	5:69781405:C:A	Chr5	69781405	A	C	0.270833	0.254412	6.07358e-09
ENSBTAG00000010144	MTERF2	Chr5	70257832	5:70295721:GA:G	Chr5	70295721	GA	G	0.13447	0.546768	8.40084e-19
ENSBTAG00000027064	BTBD11	Chr5	70577673	5:70374526:TTTG:T	Chr5	70374526	TTTG	T	0.242424	-0.548664	0.000170007
ENSBTAG00000004654	PWP1	Chr5	70931733	5:70931804:T:G	Chr5	70931804	G	T	0.119318	0.233113	3.93518e-06
ENSBTAG00000011070	RTCB	Chr5	71038972	5:71667749:A:G	Chr5	71667749	A	G	0.454545	-0.181386	0.0162263
ENSBTAG00000020634	FBXO7	Chr5	71099854	5:71122015:A:G	Chr5	71122015	G	A	0.414773	0.233326	2.18553e-21
ENSBTAG00000020636	SYN3	Chr5	71201217	5:71611933:GT:G	Chr5	71611933	GT	G	0.272727	0.304048	1.65461e-08
ENSBTAG00000020638	TIMP3	Chr5	71388891	5:70746793:G:A	Chr5	70746793	G	A	0.295455	-0.308709	4.68581e-05
ENSBTAG00000050644	NA	Chr5	71612550	5:71635923:T:C	Chr5	71635923	C	T	0.49053	-0.196839	3.23509e-11
ENSBTAG00000018556	MGC137211	Chr5	71706751	5:71707573:C:T	Chr5	71707573	C	T	0.25947	-1.79237e-08	0.0151712
ENSBTAG00000026666	MGC137014	Chr5	71732441	5:71732459:T:C	Chr5	71732459	T	C	0.274621	0.381714	1.14192e-22
ENSBTAG00000021953	LARGE1	Chr5	72364695	5:72469790:A:G	Chr5	72469790	G	A	0.257576	-0.184233	0.000814825
ENSBTAG00000049297	NA	Chr5	74275837	5:74228431:C:A	Chr5	74228431	A	C	0.426136	-0.189213	2.83147e-16
ENSBTAG00000037799	NA	Chr5	74303468	5:74411083:C:A	Chr5	74411083	C	A	0.232955	-0.275984	6.33471e-09
ENSBTAG00000052884	NA	Chr5	74349227	5:74331357:G:GT	Chr5	74331357	G	GT	0.329545	0.421024	8.93299e-19
ENSBTAG00000048740	NA	Chr5	74452245	5:74623881:A:ATT	Chr5	74623881	A	ATT	0.206439	-0.294499	6.06024e-09
ENSBTAG00000050417	NA	Chr5	74487043	5:74626520:AT:A	Chr5	74626520	AT	A	0.204545	-0.238827	9.42283e-13
ENSBTAG00000038652	NA	Chr5	74561456	5:74595024:A:T	Chr5	74595024	A	T	0.399621	-0.28064	0.000182512
ENSBTAG00000039524	NA	Chr5	74571162	5:73961877:CT:C	Chr5	73961877	CT	C	0.208333	0.717635	9.31957e-07
ENSBTAG00000040244	APOL3	Chr5	74600518	5:74663134:G:A	Chr5	74663134	G	A	0.25947	-1.29231e-07	0.00284423
ENSBTAG00000012192	NA	Chr5	74628935	5:74857726:A:C	Chr5	74857726	A	C	0.0852273	1.64827	8.1284e-10
ENSBTAG00000000667	APOL3	Chr5	74694652	5:74490125:CAAAGCACA:C	Chr5	74490125	CAAAGCACA	C	0.191288	0.399708	3.43472e-09
ENSBTAG00000010402	MYH9	Chr5	74805905	5:74820297:A:G	Chr5	74820297	G	A	0.376426	-0.2469	1.82632e-10
ENSBTAG00000000014	TXN2	Chr5	74893752	5:75218185:A:C	Chr5	75218185	A	C	0.191288	0.284441	2.05765e-05
ENSBTAG00000000015	FOXRED2	Chr5	74919112	5:74846860:C:T	Chr5	74846860	C	T	0.166667	0.213912	0.00955787
ENSBTAG00000001988	EIF3D	Chr5	74939376	5:74988583:G:A	Chr5	74988583	A	G	0.24053	-0.249371	1.09479e-05
ENSBTAG00000026657	IFT27	Chr5	75158505	5:75170561:C:T	Chr5	75170561	C	T	0.378788	-0.370346	0.00200201
ENSBTAG00000009064	CSF2RB	Chr5	75349089	5:75255471:C:A	Chr5	75255471	A	C	0.30303	-0.170511	5.08298e-05
ENSBTAG00000030650	TST	Chr5	75442678	5:75630774:C:T	Chr5	75630774	T	C	0.0700758	-0.589038	1.16266e-23
ENSBTAG00000032152	TMPRSS6	Chr5	75529894	5:75075279:A:G	Chr5	75075279	A	G	0.363636	0.171351	0.0124801
ENSBTAG00000011043	RAC2	Chr5	75673313	5:75673856:C:T	Chr5	75673856	C	T	0.482955	-0.0965063	0.0186729
ENSBTAG00000015044	CARD10	Chr5	75940103	5:75918458:TCTGCTGGGAGGCCCAGTC:T	Chr5	75918458	T	TCTGCTGGGAGGCCCAGTC	0.301136	0.190972	0.000385585
ENSBTAG00000030632	ALG10	Chr5	76113238	5:77103767:A:T	Chr5	77103767	A	T	0.229167	-0.245619	0.00208807
ENSBTAG00000011399	YARS2	Chr5	77131743	5:77058242:C:T	Chr5	77058242	C	T	0.363636	-0.279687	0.00902315
ENSBTAG00000011395	DNM1L	Chr5	77205083	5:77208367:CATAA:C	Chr5	77208367	CATAA	C	0.270833	-0.250555	5.68627e-16
ENSBTAG00000005453	FGD4	Chr5	77463105	5:77397596:A:T	Chr5	77397596	A	T	0.0890151	-0.327914	2.32768e-08
ENSBTAG00000004999	RESF1	Chr5	77950862	5:78335098:A:C	Chr5	78335098	C	A	0.486742	-0.238193	4.0904e-07
ENSBTAG00000000877	ETFBKMT	Chr5	78279920	5:78298457:C:T	Chr5	78298457	T	C	0.335227	3.83999e-07	3.14923e-10
ENSBTAG00000020315	DENND5B	Chr5	78374552	5:77726460:A:C	Chr5	77726460	A	C	0.229167	-0.369596	9.45257e-07
ENSBTAG00000011095	FAR2	Chr5	80337660	5:79344525:G:GCTAA	Chr5	79344525	G	GCTAA	0.0795455	-0.485136	0.000611196
ENSBTAG00000012448	CCDC91	Chr5	81592476	5:81399513:A:G	Chr5	81399513	A	G	0.401515	0.183245	0.0019812
ENSBTAG00000006369	MRPS35	Chr5	82125299	5:82105267:G:A	Chr5	82105267	G	A	0.170455	-0.903996	6.26364e-09
ENSBTAG00000022083	REP15	Chr5	82134596	5:82231006:A:G	Chr5	82231006	G	A	0.484848	0.418224	0.00235565
ENSBTAG00000004283	PPFIBP1	Chr5	82342855	5:82409136:A:T	Chr5	82409136	A	T	0.452652	0.168237	1.74197e-07
ENSBTAG00000011798	STK38L	Chr5	82646675	5:81923912:C:T	Chr5	81923912	C	T	0.104167	-0.331178	0.00130027
ENSBTAG00000005082	MED21	Chr5	82782365	5:82782033:C:T	Chr5	82782033	T	C	0.344106	-0.268632	0.00746239
ENSBTAG00000006985	TM7SF3	Chr5	82791611	5:82796200:C:T	Chr5	82796200	C	T	0.373106	0.351181	1.43902e-08
ENSBTAG00000013515	INTS13	Chr5	82866001	5:82783184:G:A	Chr5	82783184	A	G	0.339015	-0.178337	0.0141383
ENSBTAG00000000393	SSPN	Chr5	83723213	5:83859434:T:C	Chr5	83859434	T	C	0.0643939	0.730227	0.00118406
ENSBTAG00000030575	BHLHE41	Chr5	83818250	5:83061358:T:C	Chr5	83061358	T	C	0.263258	0.244967	0.00622499
ENSBTAG00000021980	RASSF8	Chr5	83894327	5:83317203:G:A	Chr5	83317203	G	A	0.102273	-0.464913	0.000554093
ENSBTAG00000048719	NA	Chr5	85456820	5:85456829:G:C	Chr5	85456829	G	C	0.0246212	-0.696108	0.000607823
ENSBTAG00000001673	C2CD5	Chr5	87691741	5:87660820:T:G	Chr5	87660820	T	G	0.25947	0.19522	3.72522e-07
ENSBTAG00000010136	CMAS	Chr5	88170546	5:88320955:C:CA	Chr5	88320955	C	CA	0.278409	-0.124957	0.000235897
ENSBTAG00000019294	ABCC9	Chr5	88262951	5:88089198:G:C	Chr5	88089198	C	G	0.445076	0.275978	0.00491999
ENSBTAG00000019603	LDHB	Chr5	88544524	5:88547140:G:C	Chr5	88547140	G	C	0.0606061	-0.299624	4.07364e-06
ENSBTAG00000013333	GYS2	Chr5	88602174	5:89094374:C:T	Chr5	89094374	C	T	0.119318	0.438841	1.18069e-05
ENSBTAG00000021083	RECQL	Chr5	88697523	5:88619082:G:A	Chr5	88619082	G	A	0.0378788	-0.507449	0.000589677
ENSBTAG00000021078	PYROXD1	Chr5	88756498	5:88769283:TG:T	Chr5	88769283	T	TG	0.234848	-0.384759	7.42113e-06
ENSBTAG00000003282	SLCO1A2	Chr5	88834637	5:88847308:A:G	Chr5	88847308	A	G	0.458333	-0.233175	1.05122e-08
ENSBTAG00000017571	PLEKHA5	Chr5	90862839	5:90688552:C:T	Chr5	90688552	T	C	0.359848	0.213276	1.74035e-06
ENSBTAG00000020715	PIK3C2G	Chr5	91842738	5:91921184:C:A	Chr5	91921184	C	A	0.119318	0.68258	1.87896e-10
ENSBTAG00000008541	MGST1	Chr5	93521047	5:93520821:C:T	Chr5	93520821	C	T	0.494318	-3.80044e-07	3.52553e-16
ENSBTAG00000022167	DERA	Chr5	94006820	5:93920696:G:A	Chr5	93920696	A	G	0.359848	0.368911	2.14087e-07
ENSBTAG00000014175	STRAP	Chr5	94039904	5:93456649:T:C	Chr5	93456649	T	C	0.464015	0.20602	0.0092684
ENSBTAG00000000369	EPS8	Chr5	94125187	5:94293324:C:A	Chr5	94293324	C	A	0.102273	-1.67508	1.62914e-15
ENSBTAG00000012370	MGP	Chr5	95024683	5:95103901:T:TA	Chr5	95103901	T	TA	0.414773	-0.185645	0.00841651
ENSBTAG00000008352	ART4	Chr5	95068427	5:95204609:T:C	Chr5	95204609	T	C	0.0227273	-1.12097	0.00290814
ENSBTAG00000030503	H2AJ	Chr5	95137326	5:95667520:G:A	Chr5	95667520	A	G	0.36553	-0.310856	0.0195696
ENSBTAG00000014322	FAM234B	Chr5	96862648	5:96788085:G:T	Chr5	96788085	T	G	0.117424	0.204127	0.0106119
ENSBTAG00000005868	HEBP1	Chr5	96875315	5:96910476:ATC:A	Chr5	96910476	ATC	A	0.24053	-1.8642e-06	1.24287e-19
ENSBTAG00000039509	GPRC5A	Chr5	96980220	5:96854533:C:T	Chr5	96854533	T	C	0.255682	0.275201	0.000272475
ENSBTAG00000019608	DDX47	Chr5	97030497	5:97026112:G:A	Chr5	97026112	A	G	0.274621	-0.276623	0.00952554
ENSBTAG00000002362	APOLD1	Chr5	97051826	5:97048408:G:T	Chr5	97048408	G	T	0.0833333	-0.910596	0.000431627
ENSBTAG00000008721	MANSC1	Chr5	97454274	5:97450667:A:G	Chr5	97450667	G	A	0.361742	-0.453886	5.49334e-06
ENSBTAG00000014605	ETV6	Chr5	98225335	5:97909831:A:AC	Chr5	97909831	A	AC	0.0549242	-0.24591	0.0017008
ENSBTAG00000009663	YBX3	Chr5	98853393	5:98757333:G:T	Chr5	98757333	G	T	0.467803	-0.35153	0.000640625
ENSBTAG00000015351	STYK1	Chr5	98891932	5:99515368:T:A	Chr5	99515368	A	T	0.242424	0.447845	0.0150798
ENSBTAG00000019235	MAGOHB	Chr5	98952627	5:98952796:C:G	Chr5	98952796	G	C	0.223485	0.524884	7.68545e-09
ENSBTAG00000049367	NA	Chr5	99171198	5:99005235:G:GTT	Chr5	99005235	GTT	G	0.183712	0.815796	7.6855e-06
ENSBTAG00000052514	NA	Chr5	99387873	5:99299974:CA:C	Chr5	99299974	C	CA	0.162879	0.441706	6.86015e-05
ENSBTAG00000004917	KLRK1	Chr5	99603138	5:98626003:A:G	Chr5	98626003	A	G	0.371212	-0.356806	0.000220096
ENSBTAG00000046389	KLRD1	Chr5	99660385	5:99680839:T:C	Chr5	99680839	T	C	0.36553	0.346881	0.000980158
ENSBTAG00000030426	NA	Chr5	99752814	5:99716810:T:C	Chr5	99716810	T	C	0.092803	0.374532	0.00117884
ENSBTAG00000014546	CLEC7A	Chr5	99833308	5:99414276:T:C	Chr5	99414276	C	T	0.168561	-0.615301	1.27356e-08
ENSBTAG00000030424	CLEC1A	Chr5	99860313	5:100102220:T:TA	Chr5	100102220	T	TA	0.162879	0.230391	3.08971e-05
ENSBTAG00000030423	CLEC1B	Chr5	99936312	5:99927788:CTA:C	Chr5	99927788	CTA	C	0.371212	0.165128	0.0163216
ENSBTAG00000012815	CLEC12A	Chr5	99947297	5:99956699:C:G	Chr5	99956699	C	G	0.25	-0.218746	0.000156365
ENSBTAG00000046980	KLRF2	Chr5	100060577	5:100060418:TA:T	Chr5	100060418	TA	T	0.227273	0.903877	9.11008e-19
ENSBTAG00000049487	NA	Chr5	100127741	5:100131874:C:T	Chr5	100131874	C	T	0.318182	0.46473	3.71769e-09
ENSBTAG00000012026	NA	Chr5	100181623	5:100208387:C:A	Chr5	100208387	A	C	0.403409	0.290067	6.83419e-05
ENSBTAG00000037534	KLRF1	Chr5	100238336	5:100337171:C:T	Chr5	100337171	T	C	0.399621	0.571648	1.09909e-08
ENSBTAG00000039980	CLECL1	Chr5	100319679	5:100238223:TA:T	Chr5	100238223	TA	T	0.278409	-0.234677	0.00296998
ENSBTAG00000046324	NA	Chr5	100506412	5:99753602:CT:C	Chr5	99753602	CT	C	0.469697	-0.19163	2.58401e-09
ENSBTAG00000042919	U6	Chr5	100747324	5:99854802:A:AC	Chr5	99854802	AC	A	0.460227	-0.35525	0.00545467
ENSBTAG00000013640	KLRG1	Chr5	100964339	5:100956739:A:T	Chr5	100956739	A	T	0.140152	0.507511	0.000230116
ENSBTAG00000038490	CLEC4A	Chr5	101616710	5:101616495:T:C	Chr5	101616495	T	C	0.450758	-4.00293e-07	4.50536e-13
ENSBTAG00000023635	CLEC6A	Chr5	101642769	5:101656900:G:GCT	Chr5	101656900	GCT	G	0.409091	0.222384	4.44142e-18
ENSBTAG00000019669	CD163	Chr5	101786079	5:102482015:T:C	Chr5	102482015	T	C	0.0776515	-0.273132	0.00346568
ENSBTAG00000008129	CLSTN3	Chr5	103250646	5:103297786:G:A	Chr5	103297786	G	A	0.390152	0.480721	9.92537e-18
ENSBTAG00000008127	RBP5	Chr5	103251545	5:103293274:AAC:A	Chr5	103293274	AAC	A	0.293561	0.254532	1.93137e-12
ENSBTAG00000016204	C1RL	Chr5	103273389	5:103302093:GCCACCTCTTCTTAATATCT:G	Chr5	103302093	GCCACCTCTTCTTAATATCT	G	0.390152	0.243999	3.33768e-17
ENSBTAG00000037743	NA	Chr5	103320284	5:103361802:A:G	Chr5	103361802	A	G	0.104167	0.560175	0.00083609
ENSBTAG00000008612	C1R	Chr5	103358823	5:103465570:C:CAA	Chr5	103465570	C	CAA	0.0643939	-0.441447	2.59011e-11
ENSBTAG00000004840	C1S	Chr5	103419088	5:103138869:C:A	Chr5	103138869	C	A	0.0738636	-0.296851	8.89744e-06
ENSBTAG00000013123	PHB2	Chr5	103493144	5:103520337:A:C	Chr5	103520337	C	A	0.431818	-0.317539	9.68289e-05
ENSBTAG00000019782	TPI1	Chr5	103583951	5:103193735:C:A	Chr5	103193735	C	A	0.270833	-0.367911	3.49017e-05
ENSBTAG00000019780	USP5	Chr5	103598534	5:103751518:T:C	Chr5	103751518	T	C	0.342803	0.257101	0.000119963
ENSBTAG00000003598	P3H3	Chr5	103623450	5:103654811:C:T	Chr5	103654811	T	C	0.477273	-0.258975	5.82741e-06
ENSBTAG00000034295	LAG3	Chr5	103672761	5:103105629:C:G	Chr5	103105629	G	C	0.159091	-0.481351	0.00379714
ENSBTAG00000014931	MLF2	Chr5	103691195	5:103682868:C:G	Chr5	103682868	G	C	0.473485	-0.159232	0.000189146
ENSBTAG00000007024	NA	Chr5	103711055	5:103713702:T:C	Chr5	103713702	C	T	0.214015	0.427578	0.00590244
ENSBTAG00000011111	COPS7A	Chr5	103719840	5:103667826:G:A	Chr5	103667826	G	A	0.176136	0.353048	0.00154493
ENSBTAG00000034246	ACRBP	Chr5	103786618	5:103682868:C:G	Chr5	103682868	G	C	0.473485	0.330945	0.000185136
ENSBTAG00000014733	NOP2	Chr5	103848171	5:104108154:C:T	Chr5	104108154	C	T	0.102273	0.544347	3.50447e-05
ENSBTAG00000014731	GAPDH	Chr5	103874824	5:103864870:G:A	Chr5	103864870	A	G	0.130682	0.284545	0.00828554
ENSBTAG00000014729	MRPL51	Chr5	103902392	5:103902786:A:C	Chr5	103902786	C	A	0.118321	-0.45654	0.000500592
ENSBTAG00000002631	SCNN1A	Chr5	103993589	5:104008534:T:TTTAC	Chr5	104008534	TTTAC	T	0.492424	0.47392	0.000313725
ENSBTAG00000004211	TNFRSF1A	Chr5	104024028	5:104036128:C:T	Chr5	104036128	C	T	0.148855	0.339078	5.15455e-05
ENSBTAG00000004208	PLEKHG6	Chr5	104055041	5:104054719:C:A	Chr5	104054719	A	C	0.395833	0.408778	1.27766e-10
ENSBTAG00000010223	NTF3	Chr5	104823230	5:104834507:C:G	Chr5	104834507	C	G	0.231061	-0.557243	0.000393075
ENSBTAG00000005465	NDUFA9	Chr5	105495946	5:105687543:CAT:C	Chr5	105687543	CAT	C	0.162879	0.297521	0.00160499
ENSBTAG00000053303	C5H12orf4	Chr5	105596336	5:105600674:C:A	Chr5	105600674	C	A	0.392045	0.49345	3.54616e-09
ENSBTAG00000016650	TIGAR	Chr5	105747498	5:105796953:TA:T	Chr5	105796953	TA	T	0.130682	0.431983	2.49642e-10
ENSBTAG00000000275	PARP11	Chr5	106112460	5:106136806:G:C	Chr5	106136806	G	C	0.244318	0.631258	1.07045e-07
ENSBTAG00000020699	TSPAN11	Chr5	106485064	5:107483029:G:C	Chr5	107483029	G	C	0.0965909	0.581529	0.000651168
ENSBTAG00000049163	TSPAN9	Chr5	106745949	5:106699126:A:C	Chr5	106699126	C	A	0.0890151	-0.270324	0.006232
ENSBTAG00000015879	TULP3	Chr5	106875967	5:107452201:G:A	Chr5	107452201	A	G	0.431818	-0.269853	0.00343446
ENSBTAG00000015878	RHNO1	Chr5	106886490	5:106880730:GA:G	Chr5	106880730	GA	G	0.465909	-0.375468	2.71117e-13
ENSBTAG00000011902	WASHC1	Chr5	107014573	5:107093034:G:A	Chr5	107093034	G	A	0.316288	0.195829	0.00889728
ENSBTAG00000038415	SLC6A12	Chr5	107165693	5:107165416:C:T	Chr5	107165416	C	T	0.0681818	0.63271	1.00014e-10
ENSBTAG00000000049	CCDC77	Chr5	107294770	5:107313477:G:C	Chr5	107313477	G	C	0.270833	-0.503362	3.05444e-07
ENSBTAG00000005221	WNK1	Chr5	107577727	5:107189195:C:CG	Chr5	107189195	CG	C	0.211027	0.256638	0.000868907
ENSBTAG00000005225	RAD52	Chr5	107734428	5:107807303:G:A	Chr5	107807303	G	A	0.263258	0.507115	5.11873e-05
ENSBTAG00000052374	FBXL14	Chr5	108113877	5:108118395:C:T	Chr5	108118395	T	C	0.3125	-0.302458	4.89115e-05
ENSBTAG00000011067	IL17RA	Chr5	108808132	5:108837389:C:T	Chr5	108837389	C	T	0.450758	0.447325	1.17456e-12
ENSBTAG00000017313	ADA2	Chr5	108879525	5:108834061:G:T	Chr5	108834061	G	T	0.174242	-0.378587	3.28584e-09
ENSBTAG00000014238	ATP6V1E1	Chr5	109082272	5:109138927:T:C	Chr5	109138927	T	C	0.350379	0.257784	0.000802119
ENSBTAG00000013988	BID	Chr5	109154244	5:109147710:G:A	Chr5	109147710	G	A	0.414773	-0.276525	0.000983166
ENSBTAG00000011826	PEX26	Chr5	109353913	5:109550534:C:T	Chr5	109550534	C	T	0.353053	-0.39922	0.00336824
ENSBTAG00000018530	TUBA8	Chr5	109375097	5:109224802:C:T	Chr5	109224802	C	T	0.132576	-0.254251	0.017854
ENSBTAG00000015089	LGALS1	Chr5	109512490	5:109229980:C:G	Chr5	109229980	G	C	0.0890151	0.563917	2.91636e-05
ENSBTAG00000051118	NOL12	Chr5	109519066	5:109519520:G:A	Chr5	109519520	G	A	0.297348	-0.404775	3.18649e-12
ENSBTAG00000037703	MICALL1	Chr5	109709318	5:109184743:G:A	Chr5	109184743	G	A	0.308712	-0.209707	0.00378946
ENSBTAG00000015268	PICK1	Chr5	109834676	5:109713649:G:C	Chr5	109713649	G	C	0.113636	0.758862	8.92271e-08
ENSBTAG00000015290	BAIAP2L2	Chr5	109891295	5:109887788:T:G	Chr5	109887788	T	G	0.475379	-0.211503	5.80204e-12
ENSBTAG00000010157	TOMM22	Chr5	110314072	5:110320439:A:G	Chr5	110320439	G	A	0.418561	-0.498699	1.18462e-19
ENSBTAG00000003693	SUN2	Chr5	110377270	5:110359109:C:T	Chr5	110359109	C	T	0.397338	0.748211	1.80186e-26
ENSBTAG00000049822	DNAL4	Chr5	110414622	5:110414734:T:G	Chr5	110414734	T	G	0.263258	0.631456	1.6466e-05
ENSBTAG00000003228	RPL3	Chr5	110752075	5:110790072:C:T	Chr5	110790072	C	T	0.0568182	-0.851847	8.46295e-05
ENSBTAG00000017439	MIEF1	Chr5	110930790	5:110869110:A:G	Chr5	110869110	A	G	0.123106	-0.610652	2.25904e-07
ENSBTAG00000017463	RPS19BP1	Chr5	110954950	5:110983381:G:C	Chr5	110983381	G	C	0.282197	-0.265173	1.08366e-06
ENSBTAG00000009624	SGSM3	Chr5	111705768	5:111690586:C:T	Chr5	111690586	C	T	0.284091	-0.458826	3.46308e-10
ENSBTAG00000006200	SLC25A17	Chr5	112086674	5:112174867:T:C	Chr5	112174867	T	C	0.354167	0.25114	4.88838e-13
ENSBTAG00000002782	ZC3H7B	Chr5	112434865	5:112443041:GT:G	Chr5	112443041	G	GT	0.399621	-0.135918	0.00355907
ENSBTAG00000016580	TEF	Chr5	112495970	5:112560108:C:T	Chr5	112560108	C	T	0.397727	-0.193296	0.00176783
ENSBTAG00000006423	PHF5A	Chr5	112567981	5:112567354:C:T	Chr5	112567354	C	T	0.227273	-0.65483	2.96834e-09
ENSBTAG00000005311	POLR3H	Chr5	112629599	5:112720103:T:TA	Chr5	112720103	T	TA	0.0776515	-0.374265	3.04322e-07
ENSBTAG00000004009	PMM1	Chr5	112670817	5:112725987:G:A	Chr5	112725987	A	G	0.363636	-0.474382	3.23993e-08
ENSBTAG00000009506	NAGA	Chr5	113032754	5:113066063:AT:A	Chr5	113066063	A	AT	0.359848	0.540965	9.83768e-14
ENSBTAG00000009507	PHETA2	Chr5	113035566	5:113046214:G:C	Chr5	113046214	C	G	0.352273	0.443668	2.16873e-07
ENSBTAG00000009508	SMDT1	Chr5	113040979	5:113270804:C:CAA	Chr5	113270804	C	CAA	0.329545	-0.201904	0.00753598
ENSBTAG00000026501	MGC127055	Chr5	113082470	5:113024222:C:T	Chr5	113024222	C	T	0.0454545	-0.251474	2.2746e-08
ENSBTAG00000026502	CYP2D14	Chr5	113094984	5:112740093:T:A	Chr5	112740093	A	T	0.325758	-0.0866288	0.000699603
ENSBTAG00000000662	TCF20	Chr5	113195472	5:113276192:G:A	Chr5	113276192	A	G	0.467803	0.188216	0.00273904
ENSBTAG00000016507	SERHL2	Chr5	113417142	5:113498938:C:T	Chr5	113498938	C	T	0.407197	-0.460872	0.00299458
ENSBTAG00000016510	RRP7	Chr5	113444152	5:113429795:G:A	Chr5	113429795	G	A	0.221591	-0.497518	1.34285e-06
ENSBTAG00000016516	CYB5R3	Chr5	113498670	5:113447599:GA:G	Chr5	113447599	GA	G	0.327652	-0.401221	8.70994e-08
ENSBTAG00000019290	PACSIN2	Chr5	113804112	5:113789006:T:TA	Chr5	113789006	TA	T	0.40613	0.396976	6.87662e-18
ENSBTAG00000012030	TTLL1	Chr5	113862433	5:113853437:T:G	Chr5	113853437	T	G	0.346591	-0.55502	0.000109722
ENSBTAG00000002413	MCAT	Chr5	113919965	5:113914886:T:C	Chr5	113914886	T	C	0.380682	0.561453	1.35216e-14
ENSBTAG00000018073	TSPO	Chr5	113927820	5:113971579:T:C	Chr5	113971579	T	C	0.0530303	0.372719	0.00184127
ENSBTAG00000001708	TTLL12	Chr5	113959663	5:113953902:G:GC	Chr5	113953902	G	GC	0.106061	-0.439286	1.88764e-07
ENSBTAG00000045957	SAMM50	Chr5	114694986	5:114710975:G:A	Chr5	114710975	A	G	0.292969	0.488942	1.59169e-11
ENSBTAG00000021978	PARVB	Chr5	114752958	5:114263080:T:C	Chr5	114263080	C	T	0.38447	-0.178249	0.00940409
ENSBTAG00000008057	PARVG	Chr5	114877722	5:114722354:G:A	Chr5	114722354	A	G	0.214015	0.25565	0.00510485
ENSBTAG00000010590	FAM118A	Chr5	115707025	5:115445376:A:AC	Chr5	115445376	AC	A	0.445076	-0.249698	0.0125295
ENSBTAG00000012088	FBLN1	Chr5	115888384	5:115795973:T:A	Chr5	115795973	T	A	0.236742	0.272997	0.00559655
ENSBTAG00000009351	ATXN10	Chr5	116028708	5:115996970:A:C	Chr5	115996970	A	C	0.265152	-0.214335	0.0107646
ENSBTAG00000008065	CDPF1	Chr5	116522344	5:116688911:G:A	Chr5	116688911	G	A	0.318182	-0.374805	6.67928e-14
ENSBTAG00000003017	TTC38	Chr5	116584848	5:116598050:A:T	Chr5	116598050	A	T	0.272727	0.193297	6.9604e-11
ENSBTAG00000008066	NA	Chr5	116584877	5:116605682:C:T	Chr5	116605682	C	T	0.251894	0.304904	1.4018e-11
ENSBTAG00000021803	GRAMD4	Chr5	116838077	5:116803874:T:C	Chr5	116803874	T	C	0.0833333	-0.633532	1.43008e-06
ENSBTAG00000046654	CERK	Chr5	116943141	5:117307903:G:A	Chr5	117307903	G	A	0.138258	-0.303884	0.00160226
ENSBTAG00000022986	TAFA5	Chr5	118304836	5:118371088:A:T	Chr5	118371088	T	A	0.412879	0.184609	0.00629798
ENSBTAG00000046173	ALG12	Chr5	119312093	5:119083663:G:A	Chr5	119083663	G	A	0.0435606	-0.596739	0.00176006
ENSBTAG00000011000	HDAC10	Chr5	119616810	5:119593978:CAGGG:C	Chr5	119593978	C	CAGGG	0.380228	0.330117	6.07949e-07
ENSBTAG00000019574	MAPK12	Chr5	119627315	5:119627643:A:C	Chr5	119627643	A	C	0.333333	0.26078	2.65243e-12
ENSBTAG00000014966	PLXNB2	Chr5	119666475	5:119654266:G:C	Chr5	119654266	G	C	0.433206	0.190898	1.32368e-06
ENSBTAG00000024756	DENND6B	Chr5	119680303	5:119461132:T:C	Chr5	119461132	C	T	0.477186	0.356689	0.0164321
ENSBTAG00000018660	PPP6R2	Chr5	119690577	5:119692097:A:G	Chr5	119692097	A	G	0.284091	-0.524531	1.86734e-11
ENSBTAG00000002559	MIOX	Chr5	119793805	5:119789295:CG:C	Chr5	119789295	CG	C	0.456274	0.0928846	0.0157359
ENSBTAG00000017925	LMF2	Chr5	119812020	5:119807160:C:T	Chr5	119807160	T	C	0.481061	-0.251376	2.92737e-08
ENSBTAG00000012607	NCAPH2	Chr5	119812250	5:119429607:T:C	Chr5	119429607	C	T	0.473485	-0.347055	0.000431864
ENSBTAG00000016050	CHKB	Chr5	119901095	5:119937358:CT:C	Chr5	119937358	CT	C	0.172348	0.452772	0.000737492
ENSBTAG00000016053	ARSA	Chr5	119945935	5:119470119:T:C	Chr5	119470119	T	C	0.13447	-0.422547	7.55098e-09
ENSBTAG00000004876	RABL2B	Chr5	120037422	5:119879172:C:T	Chr5	119879172	C	T	0.369318	-0.388836	0.00294064
ENSBTAG00000053871	APELA	Chr6	147131	6:355571:G:C	Chr6	355571	G	C	0.242424	0.171735	2.13976e-05
ENSBTAG00000047586	NPY1R	Chr6	2433428	6:2343572:A:G	Chr6	2343572	G	A	0.344697	0.460086	3.4641e-07
ENSBTAG00000004945	BBS7	Chr6	3385321	6:3388251:T:C	Chr6	3388251	C	T	0.25	-5.42532e-07	3.35187e-27
ENSBTAG00000021746	ANXA5	Chr6	3557586	6:3575873:A:G	Chr6	3575873	G	A	0.357955	1.15271e-07	1.0551e-14
ENSBTAG00000010634	NDNF	Chr6	4403332	6:5042930:C:T	Chr6	5042930	C	T	0.143939	0.463441	5.86798e-09
ENSBTAG00000012111	PRDM5	Chr6	4526912	6:5059099:G:GA	Chr6	5059099	G	GA	0.164773	0.385946	0.00289398
ENSBTAG00000048273	C6H4orf3	Chr6	6006539	6:6012892:A:T	Chr6	6012892	T	A	0.38447	0.185593	8.02101e-21
ENSBTAG00000003619	SEC24D	Chr6	6491226	6:6420257:G:A	Chr6	6420257	A	G	0.397727	0.170433	0.00632104
ENSBTAG00000014080	METTL14	Chr6	6679178	6:6665655:C:A	Chr6	6665655	C	A	0.433712	-0.326987	0.0114708
ENSBTAG00000014463	CAMK2D	Chr6	11800358	6:11629935:A:T	Chr6	11629935	A	T	0.486742	0.311709	0.00343023
ENSBTAG00000002392	NA	Chr6	12311458	6:12930377:A:G	Chr6	12930377	A	G	0.24053	0.593508	1.10939e-06
ENSBTAG00000048956	NA	Chr6	12440341	6:13018107:G:A	Chr6	13018107	G	A	0.126894	0.661736	0.00158504
ENSBTAG00000026936	ZGRF1	Chr6	12992270	6:13015737:A:T	Chr6	13015737	A	T	0.19697	-0.612368	4.93883e-13
ENSBTAG00000034875	ALPK1	Chr6	13220016	6:13062247:C:T	Chr6	13062247	C	T	0.136364	-0.261305	4.7184e-11
ENSBTAG00000049422	TIFA	Chr6	13228625	6:12419245:A:C	Chr6	12419245	A	C	0.32197	-0.37374	1.03991e-05
ENSBTAG00000003941	AP1AR	Chr6	13272540	6:13272718:G:A	Chr6	13272718	G	A	0.0371094	-0.952471	4.58158e-06
ENSBTAG00000051202	NA	Chr6	15002106	6:15292218:C:T	Chr6	15292218	T	C	0.0984849	1.31025	4.85018e-08
ENSBTAG00000010564	ELOVL6	Chr6	15199667	6:15196619:G:C	Chr6	15196619	C	G	0.130682	-0.293329	0.000554479
ENSBTAG00000000751	RRH	Chr6	15590078	6:15665565:A:G	Chr6	15665565	A	G	0.426136	0.407985	0.012089
ENSBTAG00000000748	GAR1	Chr6	15604174	6:15564576:T:C	Chr6	15564576	C	T	0.418561	-0.264099	0.0118239
ENSBTAG00000015230	PLA2G12A	Chr6	15675550	6:15674995:T:C	Chr6	15674995	C	T	0.132576	0.228221	8.54693e-05
ENSBTAG00000012995	MCUB	Chr6	15813728	6:15814517:A:G	Chr6	15814517	A	G	0.251894	-0.741474	2.26265e-26
ENSBTAG00000010284	ETNPPL	Chr6	16554038	6:17368478:A:G	Chr6	17368478	A	G	0.304924	0.279638	3.91779e-06
ENSBTAG00000002049	HADH	Chr6	17252208	6:17250061:G:A	Chr6	17250061	A	G	0.32197	0.101309	1.32473e-12
ENSBTAG00000012972	CYP2U1	Chr6	17282966	6:17327492:C:T	Chr6	17327492	C	T	0.227273	-0.280541	2.98245e-06
ENSBTAG00000016805	SGMS2	Chr6	17391885	6:16913023:TA:T	Chr6	16913023	T	TA	0.422348	-0.303676	0.00873546
ENSBTAG00000004227	TBCK	Chr6	18864622	6:18236260:A:G	Chr6	18236260	A	G	0.465909	0.237477	0.00219959
ENSBTAG00000013927	GSTCD	Chr6	19453018	6:19437587:A:G	Chr6	19437587	A	G	0.359848	0.417855	2.50743e-09
ENSBTAG00000008797	ARHGEF38	Chr6	19636025	6:19636078:G:C	Chr6	19636078	G	C	0.462121	0.385032	1.55542e-07
ENSBTAG00000002428	PPA2	Chr6	19708710	6:19696942:C:T	Chr6	19696942	C	T	0.371212	0.164573	4.51607e-11
ENSBTAG00000002526	BDH2	Chr6	21762235	6:21766600:T:C	Chr6	21766600	T	C	0.403409	-4.35175e-07	1.27128e-22
ENSBTAG00000040088	SLC9B2	Chr6	21792501	6:21833878:T:C	Chr6	21833878	C	T	0.410985	0.509123	1.14301e-06
ENSBTAG00000027630	CISD2	Chr6	21976377	6:22039965:G:GT	Chr6	22039965	G	GT	0.155303	-0.276459	0.000869906
ENSBTAG00000019761	MANBA	Chr6	22062327	6:22016602:A:G	Chr6	22016602	A	G	0.145833	3.6422e-07	9.50163e-06
ENSBTAG00000005668	SLC39A8	Chr6	22459118	6:22488870:T:G	Chr6	22488870	T	G	0.310606	0.157425	0.00749301
ENSBTAG00000016005	PPP3CA	Chr6	23444709	6:23460145:C:T	Chr6	23460145	C	T	0.422348	0.237656	0.000482486
ENSBTAG00000034206	EMCN	Chr6	24210506	6:23789545:A:C	Chr6	23789545	A	C	0.422348	-0.308059	0.00135062
ENSBTAG00000004426	DNAJB14	Chr6	24740452	6:24697982:C:T	Chr6	24697982	C	T	0.185606	-0.308197	0.00591406
ENSBTAG00000011944	MTTP	Chr6	25062589	6:25062009:G:A	Chr6	25062009	A	G	0.331439	-0.186024	0.0134317
ENSBTAG00000000197	TRMT10A	Chr6	25073204	6:25184076:G:A	Chr6	25184076	G	A	0.0473485	0.350018	5.59892e-07
ENSBTAG00000034189	ADH1C	Chr6	25280924	6:25313799:G:A	Chr6	25313799	G	A	0.0568182	-0.24779	9.06404e-06
ENSBTAG00000006986	ADH6	Chr6	25325319	6:24822299:C:T	Chr6	24822299	T	C	0.219697	0.416573	0.000802474
ENSBTAG00000006991	ADH6	Chr6	25413498	6:24841952:T:C	Chr6	24841952	T	C	0.356061	-0.301121	0.000105614
ENSBTAG00000034139	ADH4	Chr6	25480628	6:25496666:T:C	Chr6	25496666	C	T	0.443182	-0.314954	4.44744e-10
ENSBTAG00000016007	ADH5	Chr6	25528830	6:25534594:CAT:C	Chr6	25534594	CAT	C	0.198864	-0.337729	8.88382e-11
ENSBTAG00000007522	RAP1GDS1	Chr6	26275541	6:27028132:A:C	Chr6	27028132	C	A	0.109848	-1.20411	0.00898866
ENSBTAG00000002084	UNC5C	Chr6	29166322	6:29219585:T:C	Chr6	29219585	T	C	0.0378788	1.18763	1.24364e-08
ENSBTAG00000012818	PDLIM5	Chr6	30142653	6:30104096:A:G	Chr6	30104096	A	G	0.121212	4.30427e-07	4.05533e-08
ENSBTAG00000019808	CCSER1	Chr6	34501208	6:34041366:T:TTGTGTGAC	Chr6	34041366	T	TTGTGTGAC	0.299242	-0.303721	5.67203e-06
ENSBTAG00000024957	SNCA	Chr6	34853389	6:34056932:T:TG	Chr6	34056932	T	TG	0.227969	0.748693	0.000149333
ENSBTAG00000045966	GPRIN3	Chr6	35563654	6:35514982:G:C	Chr6	35514982	G	C	0.339015	-0.380389	0.000649412
ENSBTAG00000015265	TIGD2	Chr6	35693638	6:35710869:C:A	Chr6	35710869	C	A	0.149621	-0.56978	8.2248e-08
ENSBTAG00000010128	NAP1L5	Chr6	36082760	6:35623939:C:T	Chr6	35623939	T	C	0.183712	-0.449	8.98116e-06
ENSBTAG00000005754	PPM1K	Chr6	36449103	6:36365903:G:C	Chr6	36365903	G	C	0.289773	0.415193	2.02455e-10
ENSBTAG00000017704	ABCG2	Chr6	36475378	6:36311188:AT:A	Chr6	36311188	AT	A	0.3125	0.155907	0.00326674
ENSBTAG00000020031	PKD2	Chr6	36672493	6:35718341:C:T	Chr6	35718341	C	T	0.0511364	-0.785858	1.50407e-05
ENSBTAG00000005989	LAP3	Chr6	37140753	6:37148600:C:T	Chr6	37148600	C	T	0.123106	0.632383	2.2976e-08
ENSBTAG00000019441	MED28	Chr6	37169217	6:37172063:G:A	Chr6	37172063	A	G	0.486742	0.365448	7.41368e-12
ENSBTAG00000005932	FAM184B	Chr6	37301540	6:37585948:T:TA	Chr6	37585948	T	TA	0.107955	-0.371223	7.51631e-05
ENSBTAG00000011973	DCAF16	Chr6	37320955	6:37027031:G:A	Chr6	37027031	G	A	0.210227	-0.513384	0.000357104
ENSBTAG00000033351	PACRGL	Chr6	40227779	6:40291760:A:T	Chr6	40291760	A	T	0.227273	-0.396586	0.00150802
ENSBTAG00000047743	KCNIP4	Chr6	41576485	6:41209046:TGAAATACAGAGGCTAGCTTATCCTCG:T	Chr6	41209046	T	TGAAATACAGAGGCTAGCTTATCCTCG	0.460227	0.42728	5.26319e-10
ENSBTAG00000004653	ADGRA3	Chr6	42116814	6:42013680:G:C	Chr6	42013680	C	G	0.418561	0.307789	6.00289e-12
ENSBTAG00000020363	GBA3	Chr6	42263477	6:42034902:T:G	Chr6	42034902	G	T	0.418561	0.385843	8.33946e-20
ENSBTAG00000017024	PPARGC1A	Chr6	43501184	6:44094971:C:A	Chr6	44094971	C	A	0.0454545	-0.370889	4.62708e-06
ENSBTAG00000008896	DHX15	Chr6	44187907	6:44299649:G:C	Chr6	44299649	C	G	0.289773	0.203495	0.017817
ENSBTAG00000013980	SOD3	Chr6	44387092	6:44400969:T:C	Chr6	44400969	T	C	0.221591	0.444464	1.69747e-08
ENSBTAG00000021940	CCDC149	Chr6	44520810	6:44368814:C:T	Chr6	44368814	C	T	0.25	-0.431972	1.5307e-05
ENSBTAG00000014616	SEPSECS	Chr6	44737391	6:44221119:A:G	Chr6	44221119	A	G	0.0984849	-0.452202	5.49664e-10
ENSBTAG00000006492	PI4K2B	Chr6	44805518	6:44909660:G:A	Chr6	44909660	G	A	0.217803	0.19361	4.46472e-10
ENSBTAG00000000646	ANAPC4	Chr6	44921532	6:44949107:C:T	Chr6	44949107	C	T	0.342803	0.188966	3.27604e-06
ENSBTAG00000002299	SEL1L3	Chr6	45352956	6:45329830:A:G	Chr6	45329830	A	G	0.348485	0.382588	8.28244e-19
ENSBTAG00000003897	SMIM20	Chr6	45403483	6:45388053:TA:T	Chr6	45388053	T	TA	0.42803	-0.308757	0.0128794
ENSBTAG00000033214	TBC1D19	Chr6	46022663	6:46781086:G:C	Chr6	46781086	G	C	0.153409	0.556872	0.00253422
ENSBTAG00000019353	STIM2	Chr6	46271031	6:46783176:G:T	Chr6	46783176	T	G	0.0643939	0.538555	0.000100699
ENSBTAG00000000061	PCDH7	Chr6	49958090	6:49984900:G:A	Chr6	49984900	G	A	0.393939	-0.352439	2.10997e-06
ENSBTAG00000049001	NA	Chr6	50428499	6:50357153:C:T	Chr6	50357153	T	C	0.424242	-0.383874	0.000391124
ENSBTAG00000006643	C6H4orf19	Chr6	56850592	6:55925342:A:G	Chr6	55925342	A	G	0.181818	-0.506206	5.18266e-06
ENSBTAG00000004329	RELL1	Chr6	57025931	6:56953803:G:C	Chr6	56953803	C	G	0.471591	0.298096	0.00524952
ENSBTAG00000005773	PGM2	Chr6	57145041	6:56147683:G:A	Chr6	56147683	G	A	0.469697	-0.255469	0.000115183
ENSBTAG00000013699	TBC1D1	Chr6	57213814	6:57212443:C:A	Chr6	57212443	C	A	0.244318	0.30092	0.00123824
ENSBTAG00000014042	TLR10	Chr6	58059082	6:58042994:G:A	Chr6	58042994	G	A	0.189394	-0.555504	0.000324222
ENSBTAG00000014031	TLR6	Chr6	58070580	6:57097136:T:G	Chr6	57097136	T	G	0.414773	0.196196	0.0134898
ENSBTAG00000033160	FAM114A1	Chr6	58091342	6:57947992:C:A	Chr6	57947992	C	A	0.0833333	-0.601734	2.1718e-07
ENSBTAG00000055220	NA	Chr6	58145191	6:57703611:A:T	Chr6	57703611	A	T	0.0814394	-0.529126	8.51826e-05
ENSBTAG00000015649	TMEM156	Chr6	58223872	6:58137905:C:T	Chr6	58137905	C	T	0.092803	0.354196	0.00171088
ENSBTAG00000006044	KLHL5	Chr6	58266642	6:58115669:GC:G	Chr6	58115669	GC	G	0.488636	-0.295088	0.00730574
ENSBTAG00000014512	WDR19	Chr6	58350007	6:58400818:C:T	Chr6	58400818	C	T	0.153409	0.436667	0.00565922
ENSBTAG00000014515	RFC1	Chr6	58492858	6:58429708:A:AAT	Chr6	58429708	A	AAT	0.441288	0.212799	0.000428832
ENSBTAG00000014517	KLB	Chr6	58528468	6:58649945:A:G	Chr6	58649945	A	G	0.185606	-0.352725	4.08748e-07
ENSBTAG00000014520	LIAS	Chr6	58569575	6:58594073:C:G	Chr6	58594073	G	C	0.263258	0.40327	0.00826011
ENSBTAG00000049934	NA	Chr6	59091218	6:59109724:A:G	Chr6	59109724	A	G	0.121212	0.441663	0.0115737
ENSBTAG00000000175	N4BP2	Chr6	59106230	6:59184486:C:A	Chr6	59184486	C	A	0.121212	0.492733	1.17541e-11
ENSBTAG00000027569	APBB2	Chr6	60095904	6:59781783:T:C	Chr6	59781783	C	T	0.244318	-0.235797	3.82737e-05
ENSBTAG00000043958	TMEM33	Chr6	60814780	6:60840703:T:TTG	Chr6	60840703	T	TTG	0.227273	0.430192	9.69049e-17
ENSBTAG00000020367	SLC30A9	Chr6	60859706	6:60870157:GAAATTGAGA:G	Chr6	60870157	GAAATTGAGA	G	0.143939	0.481179	1.11818e-06
ENSBTAG00000011156	ATP8A1	Chr6	61478178	6:61635610:A:C	Chr6	61635610	A	C	0.496212	0.215229	0.00768902
ENSBTAG00000050016	COX7B2	Chr6	65334586	6:65560097:C:A	Chr6	65560097	C	A	0.147727	0.464555	0.00160413
ENSBTAG00000000473	ATP10D	Chr6	66135881	6:66139210:G:A	Chr6	66139210	G	A	0.232955	0.111214	4.03889e-05
ENSBTAG00000009423	NIPAL1	Chr6	66702050	6:66962799:GT:G	Chr6	66962799	GT	G	0.299242	-0.242913	0.00793333
ENSBTAG00000005062	TEC	Chr6	66856803	6:66892573:C:CATGA	Chr6	66892573	C	CATGA	0.0965909	0.585609	3.41395e-05
ENSBTAG00000051457	NA	Chr6	66989648	6:66206987:G:A	Chr6	66206987	G	A	0.0587121	0.862053	0.00059281
ENSBTAG00000001839	OCIAD2	Chr6	67539862	6:67570659:G:A	Chr6	67570659	G	A	0.422348	-3.07998e-07	1.42185e-10
ENSBTAG00000014599	LRRC66	Chr6	67875658	6:67566339:G:A	Chr6	67566339	G	A	0.225379	0.208235	0.0169649
ENSBTAG00000014601	SGCB	Chr6	67905884	6:67609321:T:C	Chr6	67609321	C	T	0.464015	-0.405503	3.00785e-10
ENSBTAG00000020647	RASL11B	Chr6	68530372	6:69131692:C:T	Chr6	69131692	T	C	0.486742	-0.245598	0.00148778
ENSBTAG00000020648	SCFD2	Chr6	68936021	6:68893840:C:T	Chr6	68893840	C	T	0.1875	-1.0281	8.27123e-12
ENSBTAG00000020653	FIP1L1	Chr6	68940819	6:68837963:G:A	Chr6	68837963	A	G	0.348485	-0.221028	8.68852e-05
ENSBTAG00000020658	LNX1	Chr6	69194162	6:68492706:T:C	Chr6	68492706	C	T	0.3125	0.460059	0.000775402
ENSBTAG00000032660	CHIC2	Chr6	69596055	6:69765225:C:CG	Chr6	69765225	C	CG	0.25947	0.587419	8.16075e-09
ENSBTAG00000007173	PDGFRA	Chr6	69723656	6:68746045:A:C	Chr6	68746045	A	C	0.458333	0.184492	0.0113982
ENSBTAG00000000782	KDR	Chr6	70612683	6:71593598:C:G	Chr6	71593598	C	G	0.125	0.106573	0.0148981
ENSBTAG00000014913	SRD5A3	Chr6	70803120	6:70803927:T:C	Chr6	70803927	C	T	0.376894	-2.53017e-07	2.4692e-07
ENSBTAG00000032637	EXOC1	Chr6	71271834	6:71424521:T:C	Chr6	71424521	C	T	0.301136	0.349411	3.62243e-05
ENSBTAG00000040398	CRACD	Chr6	71604476	6:71313841:C:T	Chr6	71313841	C	T	0.094697	1.21144	4.5149e-12
ENSBTAG00000010571	PPAT	Chr6	71821764	6:71621929:GT:G	Chr6	71621929	GT	G	0.299242	0.247889	0.00208369
ENSBTAG00000010593	SRP72	Chr6	71846137	6:71839281:C:T	Chr6	71839281	C	T	0.0568182	0.469557	0.00129949
ENSBTAG00000011789	RESTB	Chr6	72173296	6:72200528:C:CT	Chr6	72200528	C	CT	0.36553	-0.26357	3.10512e-06
ENSBTAG00000019366	POLR2B	Chr6	72361661	6:72036963:G:T	Chr6	72036963	T	G	0.136364	-0.146202	0.000594163
ENSBTAG00000013918	ADGRL3	Chr6	77075370	6:78010916:G:A	Chr6	78010916	G	A	0.32197	0.249703	0.00741372
ENSBTAG00000000962	STAP1	Chr6	83291687	6:82718319:C:T	Chr6	82718319	C	T	0.183712	0.377636	0.00213042
ENSBTAG00000006837	UBA6	Chr6	83415785	6:83484726:T:C	Chr6	83484726	T	C	0.0909091	0.345497	4.70977e-08
ENSBTAG00000048013	NA	Chr6	84210644	6:84891818:ACTGATG:A	Chr6	84891818	A	ACTGATG	0.147727	0.381938	6.28382e-05
ENSBTAG00000051713	NA	Chr6	84251695	6:84048629:C:A	Chr6	84048629	A	C	0.42803	-3.07202e-07	1.2456e-10
ENSBTAG00000053068	NA	Chr6	84317573	6:84372718:C:T	Chr6	84372718	C	T	0.117424	-0.239939	4.27744e-08
ENSBTAG00000055078	NA	Chr6	84360501	6:83480869:C:T	Chr6	83480869	T	C	0.11553	0.283129	0.000114358
ENSBTAG00000054846	NA	Chr6	84402848	6:83442396:A:T	Chr6	83442396	T	A	0.418561	0.345042	3.54421e-08
ENSBTAG00000039991	UGT2B10	Chr6	84464670	6:84464742:G:A	Chr6	84464742	G	A	0.424242	-0.367298	3.19052e-21
ENSBTAG00000049291	NA	Chr6	84513073	6:84498253:G:GA	Chr6	84498253	G	GA	0.382576	-4.11002e-07	1.88863e-12
ENSBTAG00000003523	NA	Chr6	84627239	6:84625886:C:G	Chr6	84625886	G	C	0.0397727	0.581977	1.1623e-11
ENSBTAG00000039647	MGC152010	Chr6	84712945	6:83768090:G:C	Chr6	83768090	C	G	0.458333	0.12324	0.0157097
ENSBTAG00000052023	NA	Chr6	84762549	6:84759040:G:C	Chr6	84759040	G	C	0.147727	4.12602e-07	3.40514e-13
ENSBTAG00000053282	NA	Chr6	84804507	6:84874295:CA:C	Chr6	84874295	CA	C	0.206439	0.227822	8.22691e-10
ENSBTAG00000015047	NA	Chr6	84986700	6:84965015:A:C	Chr6	84965015	A	C	0.373106	0.387426	8.13663e-19
ENSBTAG00000004040	UGT2A1	Chr6	85137347	6:85040116:GTGT:G	Chr6	85040116	GTGT	G	0.439394	-0.158676	9.23245e-19
ENSBTAG00000001249	SULT1B1	Chr6	85233341	6:85299875:C:A	Chr6	85299875	C	A	0.119318	-6.63086e-07	8.34758e-19
ENSBTAG00000011952	SULT1E1	Chr6	85365114	6:85347193:C:T	Chr6	85347193	C	T	0.342803	-0.285798	0.000131269
ENSBTAG00000004793	AMBN	Chr6	85968068	6:85935343:GAAC:G	Chr6	85935343	GAAC	G	0.289773	1.06698	2.8145e-14
ENSBTAG00000009310	UTP3	Chr6	86071698	6:86057529:C:CT	Chr6	86057529	CT	C	0.285985	-0.502038	8.34661e-05
ENSBTAG00000016795	RUFY3	Chr6	86092958	6:86102059:T:TA	Chr6	86102059	T	TA	0.289773	-0.414137	1.20243e-08
ENSBTAG00000008577	GRSF1	Chr6	86214840	6:85998081:T:A	Chr6	85998081	A	T	0.308712	-0.184109	0.000377236
ENSBTAG00000002348	SLC4A4	Chr6	86381837	6:86986115:G:T	Chr6	86986115	T	G	0.382576	-0.32715	2.69766e-10
ENSBTAG00000049290	NA	Chr6	86987171	6:87304337:TG:T	Chr6	87304337	T	TG	0.429924	-0.209601	0.000199913
ENSBTAG00000013718	GC	Chr6	87007062	6:87106665:C:T	Chr6	87106665	C	T	0.295455	-0.34663	4.83458e-22
ENSBTAG00000047833	AFM	Chr6	88543287	6:89126691:C:T	Chr6	89126691	C	T	0.195076	-1.11278	9.18173e-20
ENSBTAG00000051518	NA	Chr6	88720503	6:88540748:G:A	Chr6	88540748	A	G	0.392045	-4.67444e-07	9.3817e-06
ENSBTAG00000052772	NA	Chr6	88782747	6:88630040:T:A	Chr6	88630040	A	T	0.424242	-0.577244	2.93564e-06
ENSBTAG00000009812	CXCL5	Chr6	88897013	6:88894404:C:G	Chr6	88894404	C	G	0.414773	-0.615499	6.34929e-08
ENSBTAG00000043960	MTHFD2L	Chr6	89092826	6:89106881:G:A	Chr6	89106881	A	G	0.24053	-0.596528	5.25906e-05
ENSBTAG00000018134	AREG	Chr6	89379646	6:89269743:C:T	Chr6	89269743	C	T	0.121212	0.430591	0.00182008
ENSBTAG00000004237	BTC	Chr6	89731873	6:89672067:C:T	Chr6	89672067	C	T	0.323864	0.434799	5.08465e-18
ENSBTAG00000015919	PARM1	Chr6	89847733	6:90431516:T:C	Chr6	90431516	T	C	0.107955	0.66347	0.000254931
ENSBTAG00000007190	THAP6	Chr6	90340299	6:90219950:T:C	Chr6	90219950	C	T	0.3125	0.296445	6.43304e-09
ENSBTAG00000015449	PPEF2	Chr6	90757072	6:90002050:A:G	Chr6	90002050	A	G	0.0378788	1.40136	0.00577305
ENSBTAG00000019478	NAAA	Chr6	90794386	6:90789997:A:AC	Chr6	90789997	AC	A	0.208333	-0.632571	8.98632e-11
ENSBTAG00000007639	SDAD1	Chr6	90841174	6:90845227:T:G	Chr6	90845227	T	G	0.393939	-0.56987	4.96748e-09
ENSBTAG00000010954	ART3	Chr6	90865634	6:91123141:T:C	Chr6	91123141	T	C	0.5	0.243945	0.0197758
ENSBTAG00000005603	CXCL11	Chr6	90904851	6:91167963:C:A	Chr6	91167963	C	A	0.164773	-0.503414	0.0199117
ENSBTAG00000010955	NUP54	Chr6	91043062	6:91158654:C:T	Chr6	91158654	C	T	0.282197	0.218679	0.0108531
ENSBTAG00000010956	SCARB2	Chr6	91130984	6:91158654:C:T	Chr6	91158654	C	T	0.282197	0.108588	0.00645204
ENSBTAG00000004921	NA	Chr6	91186037	6:91197471:GT:G	Chr6	91197471	G	GT	0.246212	1.71839e-07	3.29805e-07
ENSBTAG00000010389	STBD1	Chr6	91219219	6:91329546:T:C	Chr6	91329546	C	T	0.111742	-0.513773	9.86862e-05
ENSBTAG00000019633	SHROOM3	Chr6	91317427	6:91185011:C:A	Chr6	91185011	C	A	0.481061	-0.508624	6.74078e-14
ENSBTAG00000038148	SOWAHB	Chr6	91736950	6:91761007:A:G	Chr6	91761007	A	G	0.392045	0.245626	0.00215873
ENSBTAG00000021372	SEPTIN11	Chr6	91777291	6:91485090:T:C	Chr6	91485090	T	C	0.359848	0.200611	0.013149
ENSBTAG00000000599	CCNI	Chr6	91920400	6:92105511:G:A	Chr6	92105511	G	A	0.462121	0.193398	0.00101569
ENSBTAG00000049571	CNOT6L	Chr6	92527559	6:92438238:C:T	Chr6	92438238	T	C	0.49053	-0.186576	2.11711e-05
ENSBTAG00000018360	MRPL1	Chr6	92579817	6:92654185:T:C	Chr6	92654185	T	C	0.267045	0.354747	0.00160866
ENSBTAG00000010153	ANXA3	Chr6	93300737	6:93418649:T:C	Chr6	93418649	T	C	0.448864	-0.179452	0.000130068
ENSBTAG00000008887	PAQR3	Chr6	93677820	6:93661298:A:AGC	Chr6	93661298	A	AGC	0.407197	0.209797	1.79423e-17
ENSBTAG00000014805	ENOPH1	Chr6	97217196	6:97243910:TA:T	Chr6	97243910	T	TA	0.344697	0.657534	2.73179e-26
ENSBTAG00000022449	SCD5	Chr6	97637722	6:97607657:C:T	Chr6	97607657	T	C	0.363636	-0.338153	3.24667e-09
ENSBTAG00000022450	THAP9	Chr6	97724567	6:97724476:A:G	Chr6	97724476	A	G	0.0965909	-0.505278	0.000628811
ENSBTAG00000005744	COQ2	Chr6	98065079	6:98039576:G:C	Chr6	98039576	G	C	0.206439	-0.335994	1.03063e-13
ENSBTAG00000005745	HPSE	Chr6	98118656	6:97980425:G:T	Chr6	97980425	G	T	0.136364	0.392941	0.0143598
ENSBTAG00000017592	GPAT3	Chr6	98289618	6:98289607:G:GCTCCGAGA	Chr6	98289607	G	GCTCCGAGA	0.395833	-0.135405	1.01836e-06
ENSBTAG00000013495	WDFY3	Chr6	99723220	6:99797445:C:T	Chr6	99797445	T	C	0.261364	0.154124	0.00229828
ENSBTAG00000003959	ARHGAP24	Chr6	100718858	6:100580222:G:A	Chr6	100580222	G	A	0.092803	-0.548607	1.46464e-07
ENSBTAG00000031679	HSD17B13	Chr6	102212283	6:102042685:AGCGGGCTGCCGTTTCCGTCTCCGT:A	Chr6	102042685	AGCGGGCTGCCGTTTCCGTCTCCGT	A	0.107955	-4.00741e-07	2.94273e-10
ENSBTAG00000006307	HSD17B11	Chr6	102276940	6:102265632:T:C	Chr6	102265632	T	C	0.348485	-3.30234e-07	4.67584e-21
ENSBTAG00000011354	NUDT9	Chr6	102320395	6:102310425:T:C	Chr6	102310425	T	C	0.452652	0.375734	7.53885e-26
ENSBTAG00000046671	WFS1	Chr6	102928920	6:102901190:C:CAT	Chr6	102901190	C	CAT	0.214015	-0.0994414	3.35702e-06
ENSBTAG00000048770	NA	Chr6	102960723	6:102978035:G:C	Chr6	102978035	G	C	0.1875	0.575989	1.90695e-13
ENSBTAG00000054994	NA	Chr6	102982615	6:102996313:A:G	Chr6	102996313	A	G	0.354167	0.353312	3.992e-11
ENSBTAG00000004277	EVC2	Chr6	103500612	6:103453888:C:T	Chr6	103453888	C	T	0.0662879	0.636486	3.54719e-05
ENSBTAG00000005712	STX18	Chr6	104587344	6:104715108:C:CATACACACAGAGAAACATACATACAGACACATACACAG	Chr6	104715108	C	CATACACACAGAGAAACATACATACAGACACATACACAG	0.356061	2.90356e-07	4.56335e-08
ENSBTAG00000039197	SLC2A9	Chr6	105216475	6:105071518:T:C	Chr6	105071518	T	C	0.145833	-0.426765	1.58082e-12
ENSBTAG00000050234	ZNF518B	Chr6	105488007	6:105563084:G:A	Chr6	105563084	A	G	0.0359849	0.73575	0.000305114
ENSBTAG00000007449	HS3ST1	Chr6	106540229	6:106753894:A:G	Chr6	106753894	A	G	0.272727	-0.367921	0.0109395
ENSBTAG00000010343	C1QTNF7	Chr6	110457786	6:110216464:G:GA	Chr6	110216464	G	GA	0.0454545	-0.461044	0.0126059
ENSBTAG00000021214	FBXL5	Chr6	110805803	6:111735091:G:A	Chr6	111735091	G	A	0.130682	0.335063	0.00188259
ENSBTAG00000055011	FAM200B	Chr6	110857662	6:110823554:G:A	Chr6	110823554	G	A	0.439394	0.490535	5.39883e-14
ENSBTAG00000013569	CD38	Chr6	110986238	6:111037675:G:A	Chr6	111037675	G	A	0.38447	-0.406537	2.25786e-10
ENSBTAG00000019451	TAPT1	Chr6	111425316	6:111707337:C:T	Chr6	111707337	T	C	0.255682	0.27229	0.00249902
ENSBTAG00000040333	QDPR	Chr6	112939911	6:112937983:AG:A	Chr6	112937983	AG	A	0.130682	-0.362291	1.83064e-15
ENSBTAG00000003357	CLRN2	Chr6	112942656	6:112939258:T:A	Chr6	112939258	T	A	0.25	-0.368708	0.00175728
ENSBTAG00000005493	TBC1D14	Chr6	113395849	6:113479686:A:AT	Chr6	113479686	A	AT	0.337121	0.335154	5.43731e-11
ENSBTAG00000010181	GRPEL1	Chr6	113543245	6:113543385:G:A	Chr6	113543385	A	G	0.202652	0.378163	2.89934e-07
ENSBTAG00000015926	ABLIM2	Chr6	114465544	6:114466466:A:C	Chr6	114466466	C	A	0.268939	0.552846	4.71904e-17
ENSBTAG00000047613	HTRA3	Chr6	114593971	6:114633659:T:G	Chr6	114633659	T	G	0.320076	0.418143	0.000541368
ENSBTAG00000004893	ACOX3	Chr6	114697373	6:114697463:A:G	Chr6	114697463	A	G	0.293561	1.75271e-07	1.02335e-07
ENSBTAG00000004797	TRMT44	Chr6	114718710	6:115292225:A:G	Chr6	115292225	A	G	0.471591	-0.365224	2.27587e-05
ENSBTAG00000000073	LRPAP1	Chr6	115369804	6:116075029:G:A	Chr6	116075029	G	A	0.0738636	-0.359739	2.55364e-05
ENSBTAG00000001506	HTT	Chr6	115711270	6:116308893:C:T	Chr6	116308893	T	C	0.433712	0.162857	0.000319603
ENSBTAG00000001505	GRK4	Chr6	115790351	6:115781091:T:C	Chr6	115781091	T	C	0.32197	2.27612e-07	1.0276e-18
ENSBTAG00000001504	NOP14	Chr6	115790396	6:115803627:G:A	Chr6	115803627	G	A	0.0397727	-0.700315	5.21187e-07
ENSBTAG00000021128	ADD1	Chr6	115902662	6:116102377:C:T	Chr6	116102377	C	T	0.494318	-0.19772	0.00429662
ENSBTAG00000013996	SH3BP2	Chr6	115946978	6:116223731:A:C	Chr6	116223731	A	C	0.435606	0.369822	2.02027e-06
ENSBTAG00000017921	NELFA	Chr6	116624402	6:116624437:A:T	Chr6	116624437	T	A	0.340909	0.222604	1.96264e-06
ENSBTAG00000044614	NA	Chr6	116645324	6:116704474:G:C	Chr6	116704474	C	G	0.397727	0.1721	0.000305465
ENSBTAG00000007164	FGFR3	Chr6	116780691	6:116013037:G:A	Chr6	116013037	G	A	0.276515	0.18766	0.0143535
ENSBTAG00000011042	TMEM129	Chr6	116835514	6:115922315:C:A	Chr6	115922315	C	A	0.127376	0.230241	0.000943426
ENSBTAG00000012577	UVSSA	Chr6	117118752	6:117123013:C:T	Chr6	117123013	C	T	0.0871212	0.329161	0.0131453
ENSBTAG00000012575	MAEA	Chr6	117152643	6:116597911:G:A	Chr6	116597911	G	A	0.179924	-0.517174	1.03839e-06
ENSBTAG00000027464	FGFRL1	Chr6	117358800	6:117383756:C:T	Chr6	117383756	C	T	0.443182	-0.128996	0.00577914
ENSBTAG00000017240	DGKQ	Chr6	117399828	6:117405575:TA:T	Chr6	117405575	TA	T	0.473485	-0.140311	8.03856e-11
ENSBTAG00000018379	TMEM175	Chr6	117431835	6:116885954:T:C	Chr6	116885954	T	C	0.13447	-0.211578	0.00480118
ENSBTAG00000019188	GAK	Chr6	117431877	6:117339109:G:A	Chr6	117339109	A	G	0.463878	-0.256213	0.00175292
ENSBTAG00000014017	PCGF3	Chr6	117594229	6:117518557:G:C	Chr6	117518557	G	C	0.202652	-0.509251	0.0144018
ENSBTAG00000005964	PIGG	Chr6	117771804	6:117720383:A:AT	Chr6	117720383	A	AT	0.162879	-0.57133	2.26331e-08
ENSBTAG00000004856	RNF130	Chr7	1184721	7:869668:C:T	Chr7	869668	C	T	0.128788	0.330282	0.000513616
ENSBTAG00000015611	TBC1D9B	Chr7	1374504	7:1291086:G:A	Chr7	1291086	G	A	0.221591	0.238371	9.68893e-05
ENSBTAG00000015591	SQSTM1	Chr7	1508188	7:1401406:A:G	Chr7	1401406	A	G	0.244318	-0.167522	5.41773e-05
ENSBTAG00000048107	CANX	Chr7	1640391	7:1628818:A:G	Chr7	1628818	A	G	0.272727	0.165652	0.00040051
ENSBTAG00000019868	RUFY1	Chr7	1759358	7:1836458:C:A	Chr7	1836458	C	A	0.104167	0.541062	7.81359e-06
ENSBTAG00000014918	IBA57	Chr7	2966802	7:2921533:ATAAAG:A	Chr7	2921533	ATAAAG	A	0.420455	-0.372197	1.85836e-08
ENSBTAG00000003034	GATAD2A	Chr7	3913344	7:4356107:C:T	Chr7	4356107	C	T	0.299242	-0.283744	1.1477e-07
ENSBTAG00000006124	MAU2	Chr7	3965897	7:3952003:G:A	Chr7	3952003	A	G	0.431818	0.304913	0.000190705
ENSBTAG00000016042	TM6SF2	Chr7	4000995	7:4018660:C:T	Chr7	4018660	T	C	0.484848	-0.266412	1.44077e-06
ENSBTAG00000025817	BORCS8	Chr7	4065563	7:4088460:G:GC	Chr7	4088460	G	GC	0.30303	0.266733	0.000863813
ENSBTAG00000001817	TMEM161A	Chr7	4105829	7:4089662:A:G	Chr7	4089662	A	G	0.25	0.254043	1.09334e-10
ENSBTAG00000013288	SUGP2	Chr7	4184238	7:4213188:CT:C	Chr7	4213188	CT	C	0.320076	-0.235239	0.000281099
ENSBTAG00000010545	KXD1	Chr7	4614828	7:5281489:G:GAAGTCTAGAGGTGGGGACCAGCACCCA	Chr7	5281489	G	GAAGTCTAGAGGTGGGGACCAGCACCCA	0.25947	0.428428	1.15624e-05
ENSBTAG00000018349	IFI30	Chr7	5058251	7:4242448:C:T	Chr7	4242448	T	C	0.494318	0.295472	2.84408e-09
ENSBTAG00000002347	MAST3	Chr7	5102746	7:5097745:G:A	Chr7	5097745	G	A	0.416667	-0.138546	0.00458132
ENSBTAG00000012678	COLGALT1	Chr7	5566733	7:5559802:C:G	Chr7	5559802	G	C	0.25947	0.285443	6.29975e-09
ENSBTAG00000016783	PGLS	Chr7	5599169	7:6502450:T:C	Chr7	6502450	C	T	0.162879	-0.246599	0.0134341
ENSBTAG00000016775	SLC27A1	Chr7	5646428	7:5650731:G:A	Chr7	5650731	A	G	0.445076	8.23747e-08	2.57296e-08
ENSBTAG00000003914	MVB12A	Chr7	5688015	7:5679152:C:T	Chr7	5679152	C	T	0.185606	-4.12292e-08	2.68007e-08
ENSBTAG00000008021	NA	Chr7	5735683	7:5716401:G:A	Chr7	5716401	G	A	0.121212	-0.260525	3.05642e-09
ENSBTAG00000053806	NA	Chr7	5745462	7:5434386:G:A	Chr7	5434386	G	A	0.030303	-0.794119	0.0008097
ENSBTAG00000053424	NA	Chr7	5751647	7:5740571:G:GC	Chr7	5740571	GC	G	0.236742	0.463354	2.27104e-07
ENSBTAG00000005434	PLVAP	Chr7	5762753	7:5741233:C:T	Chr7	5741233	T	C	0.236742	-0.160009	6.78841e-09
ENSBTAG00000011135	OCEL1	Chr7	5874573	7:5995540:T:G	Chr7	5995540	T	G	0.121212	-0.334642	1.99444e-05
ENSBTAG00000011134	USE1	Chr7	5882165	7:5995289:T:C	Chr7	5995289	T	C	0.130682	-0.647461	1.39098e-15
ENSBTAG00000007366	HAUS8	Chr7	5991340	7:6007487:T:TG	Chr7	6007487	T	TG	0.399621	0.267053	0.000129315
ENSBTAG00000009330	SIN3B	Chr7	6224656	7:6196669:G:A	Chr7	6196669	A	G	0.376894	-0.324091	4.49913e-06
ENSBTAG00000013613	SMIM7	Chr7	6384275	7:6368594:T:C	Chr7	6368594	C	T	0.386364	0.287404	1.70844e-05
ENSBTAG00000009990	EPS15L1	Chr7	6553353	7:6553499:C:G	Chr7	6553499	G	C	0.308712	-0.328034	0.00773565
ENSBTAG00000013329	AP1M1	Chr7	6826495	7:6807952:G:A	Chr7	6807952	G	A	0.295455	0.235928	0.000786028
ENSBTAG00000046846	FAM32A	Chr7	6837079	7:6838728:T:TA	Chr7	6838728	T	TA	0.388258	0.259711	2.3052e-19
ENSBTAG00000039319	CYP4F2	Chr7	7426760	7:7511860:A:G	Chr7	7511860	A	G	0.412879	0.187483	0.000251962
ENSBTAG00000038549	NA	Chr7	7467138	7:7451517:C:CATAT	Chr7	7451517	C	CATAT	0.393939	0.18827	1.42381e-06
ENSBTAG00000039337	NA	Chr7	7483684	7:7384949:C:T	Chr7	7384949	T	C	0.289773	-0.185905	2.68067e-05
ENSBTAG00000012280	PGLYRP2	Chr7	7683490	7:7612008:G:A	Chr7	7612008	A	G	0.340909	0.241179	1.54836e-10
ENSBTAG00000011602	RASAL3	Chr7	7691748	7:7695129:C:T	Chr7	7695129	T	C	0.0814394	0.645358	5.6904e-08
ENSBTAG00000010450	WIZ	Chr7	7706770	7:7581942:G:A	Chr7	7581942	A	G	0.445076	0.120817	0.000471158
ENSBTAG00000015186	ILVBL	Chr7	7999295	7:7998674:G:C	Chr7	7998674	G	C	0.291667	0.277603	5.8314e-08
ENSBTAG00000052522	NA	Chr7	9329484	7:9261885:T:C	Chr7	9261885	T	C	0.356061	0.381002	1.31474e-17
ENSBTAG00000049961	NA	Chr7	10594262	7:10558649:CA:C	Chr7	10558649	CA	C	0.0719697	0.628854	0.00779222
ENSBTAG00000014365	NA	Chr7	10998205	7:10966832:A:AT	Chr7	10966832	AT	A	0.452652	0.368008	0.00069368
ENSBTAG00000012632	TECR	Chr7	11260179	7:11232089:GT:G	Chr7	11232089	GT	G	0.181818	-0.381019	2.51974e-09
ENSBTAG00000000764	GIPC1	Chr7	11294342	7:11429597:T:C	Chr7	11429597	T	C	0.0662879	0.536932	2.5225e-10
ENSBTAG00000021820	DDX39A	Chr7	11344120	7:11726502:A:G	Chr7	11726502	A	G	0.0530303	0.554239	0.000258099
ENSBTAG00000021818	ADGRE5	Chr7	11371722	7:12096548:T:C	Chr7	12096548	T	C	0.38447	-0.141219	0.0171919
ENSBTAG00000016933	IL27RA	Chr7	11665060	7:12107977:G:T	Chr7	12107977	G	T	0.399621	0.259256	0.00294081
ENSBTAG00000006064	BRME1	Chr7	11783949	7:11786718:G:A	Chr7	11786718	G	A	0.280303	0.472259	3.47595e-09
ENSBTAG00000006068	CC2D1A	Chr7	11784471	7:11731820:G:A	Chr7	11731820	G	A	0.354167	-0.245532	0.00310589
ENSBTAG00000002525	C7H19orf53	Chr7	11877365	7:11889206:T:TA	Chr7	11889206	T	TA	0.234848	0.167071	0.0106853
ENSBTAG00000002524	MRI1	Chr7	11885546	7:12037408:C:T	Chr7	12037408	C	T	0.0397727	0.556179	6.35467e-08
ENSBTAG00000016350	NACC1	Chr7	12461920	7:12365668:T:A	Chr7	12365668	A	T	0.127376	-0.274692	9.2258e-05
ENSBTAG00000006082	DNASE2	Chr7	12676734	7:12571757:T:C	Chr7	12571757	T	C	0.414449	0.204885	5.41516e-05
ENSBTAG00000009661	RNASEH2A	Chr7	12730155	7:12698141:G:A	Chr7	12698141	G	A	0.414773	0.307048	2.52401e-07
ENSBTAG00000012062	PRDX2	Chr7	12730804	7:13019615:T:G	Chr7	13019615	T	G	0.0511364	0.570015	0.00634976
ENSBTAG00000011825	TRIR	Chr7	12780996	7:12462747:G:C	Chr7	12462747	C	G	0.405303	0.209892	0.00186516
ENSBTAG00000011811	TNPO2	Chr7	12788982	7:12909813:A:G	Chr7	12909813	G	A	0.448864	0.374176	2.85584e-06
ENSBTAG00000006247	DHPS	Chr7	12816114	7:12813240:T:C	Chr7	12813240	T	C	0.0988593	0.547312	1.37877e-20
ENSBTAG00000011837	GET3	Chr7	12819792	7:12816202:G:A	Chr7	12816202	G	A	0.295455	0.130604	0.0131377
ENSBTAG00000006241	MAN2B1	Chr7	12838369	7:12834307:G:C	Chr7	12834307	G	C	0.111742	0.427652	2.02717e-09
ENSBTAG00000050244	ZNF177	Chr7	14232985	7:14278862:T:C	Chr7	14278862	T	C	0.0909091	-0.614146	0.00449026
ENSBTAG00000049452	UBL5	Chr7	14420690	7:14455713:G:A	Chr7	14455713	G	A	0.126894	-0.255991	0.0153583
ENSBTAG00000016988	PIN1	Chr7	14429857	7:14800395:G:A	Chr7	14800395	A	G	0.159091	-0.339177	4.8495e-05
ENSBTAG00000010179	COL5A3	Chr7	14587292	7:14278782:C:G	Chr7	14278782	G	C	0.255682	0.396758	0.0156251
ENSBTAG00000039302	ANGPTL6	Chr7	14661566	7:15172602:TG:T	Chr7	15172602	TG	T	0.0454545	-0.559813	0.010813
ENSBTAG00000042143	SNORD105	Chr7	14664957	7:13948093:A:AT	Chr7	13948093	A	AT	0.030303	0.889238	0.00955256
ENSBTAG00000002734	EIF3G	Chr7	14675554	7:14671767:G:A	Chr7	14671767	A	G	0.36553	-0.226631	0.00486985
ENSBTAG00000049560	NA	Chr7	14797142	7:14882625:T:G	Chr7	14882625	G	T	0.422348	-0.575018	9.3718e-08
ENSBTAG00000015742	ICAM3	Chr7	14867280	7:14855609:A:AT	Chr7	14855609	AT	A	0.342803	-0.528086	5.45566e-10
ENSBTAG00000011699	CDC37	Chr7	14938212	7:14921401:T:C	Chr7	14921401	C	T	0.208333	-0.286977	0.00274258
ENSBTAG00000003543	KEAP1	Chr7	15017614	7:15526917:A:AT	Chr7	15526917	A	AT	0.304924	0.303887	0.0024982
ENSBTAG00000003544	S1PR5	Chr7	15025832	7:15526917:A:AT	Chr7	15526917	A	AT	0.304924	0.327221	0.00717086
ENSBTAG00000040076	ILF3	Chr7	15137071	7:15115771:G:A	Chr7	15115771	G	A	0.142045	0.398915	1.29046e-06
ENSBTAG00000012048	CARM1	Chr7	15319707	7:15395774:A:G	Chr7	15395774	A	G	0.185606	0.398673	3.45218e-09
ENSBTAG00000025606	YIPF2	Chr7	15368373	7:15368367:A:G	Chr7	15368367	A	G	0.479087	-0.33431	2.03995e-06
ENSBTAG00000012314	LDLR	Chr7	15545283	7:15645056:T:C	Chr7	15645056	T	C	0.403409	-0.271624	0.00156676
ENSBTAG00000006185	SPC24	Chr7	15594237	7:16187290:T:C	Chr7	16187290	T	C	0.456439	-0.190607	0.000177978
ENSBTAG00000009568	KANK2	Chr7	15628102	7:15652827:A:G	Chr7	15652827	A	G	0.204545	0.226732	2.04048e-05
ENSBTAG00000002148	RAB3D	Chr7	15747432	7:15759852:G:C	Chr7	15759852	G	C	0.094697	-0.177082	0.000178951
ENSBTAG00000032292	CCDC159	Chr7	15752076	7:15118366:C:T	Chr7	15118366	C	T	0.145833	-0.392645	9.90596e-05
ENSBTAG00000008192	PLPPR2	Chr7	15759392	7:15951628:G:C	Chr7	15951628	G	C	0.310606	-0.29674	1.75441e-05
ENSBTAG00000040507	ARHGEF18	Chr7	16245818	7:16588069:T:C	Chr7	16588069	T	C	0.236641	0.218303	0.00135531
ENSBTAG00000018894	PEX11G	Chr7	16361803	7:16376898:C:T	Chr7	16376898	C	T	0.274621	-0.215447	0.0184079
ENSBTAG00000032137	PNPLA6	Chr7	16399796	7:16860736:GT:G	Chr7	16860736	G	GT	0.484848	-0.220681	0.0010315
ENSBTAG00000011356	CAMSAP3	Chr7	16447831	7:16827283:G:A	Chr7	16827283	G	A	0.155303	0.30081	0.00113409
ENSBTAG00000009178	STXBP2	Chr7	16482855	7:16488537:C:T	Chr7	16488537	T	C	0.288168	-0.214811	0.000446208
ENSBTAG00000004268	TRAPPC5	Chr7	16526037	7:16528126:G:A	Chr7	16528126	A	G	0.494318	0.224711	0.00088159
ENSBTAG00000014926	SNAPC2	Chr7	16674794	7:16651804:C:T	Chr7	16651804	C	T	0.0227273	1.54416	0.0157593
ENSBTAG00000052882	NA	Chr7	16752339	7:16917517:G:C	Chr7	16917517	G	C	0.481061	-0.316832	0.0025361
ENSBTAG00000052280	NDUFA7	Chr7	16967925	7:16969033:G:A	Chr7	16969033	G	A	0.414773	0.519553	3.50712e-12
ENSBTAG00000002475	RAB11B	Chr7	17018659	7:16839061:T:C	Chr7	16839061	C	T	0.407197	0.248262	0.000102556
ENSBTAG00000038981	NA	Chr7	17534955	7:17535890:T:C	Chr7	17535890	T	C	0.193182	-0.461769	2.49314e-08
ENSBTAG00000039160	VAV1	Chr7	17728163	7:17944374:T:G	Chr7	17944374	T	G	0.168561	0.126366	0.000999923
ENSBTAG00000017291	GPR108	Chr7	17759547	7:17759408:C:T	Chr7	17759408	C	T	0.0984849	0.529083	1.09643e-06
ENSBTAG00000046266	TNFSF9	Chr7	17966413	7:17977676:G:GGC	Chr7	17977676	G	GGC	0.151515	0.428764	0.000504467
ENSBTAG00000021018	KHSRP	Chr7	18035389	7:18182864:C:T	Chr7	18182864	T	C	0.179924	-0.179801	0.00333438
ENSBTAG00000025540	ALKBH7	Chr7	18075473	7:17857973:GT:G	Chr7	17857973	GT	G	0.140152	0.379059	0.000868929
ENSBTAG00000006069	CAPS	Chr7	18467633	7:18456521:G:A	Chr7	18456521	G	A	0.0625	-0.322883	0.00789385
ENSBTAG00000000414	FUT6	Chr7	18515027	7:18512368:A:G	Chr7	18512368	A	G	0.348485	-0.576183	1.99871e-15
ENSBTAG00000001796	CATSPERD	Chr7	18589512	7:18240335:G:C	Chr7	18240335	C	G	0.498106	-0.246841	0.014363
ENSBTAG00000001795	LONP1	Chr7	18590320	7:18595272:G:A	Chr7	18595272	A	G	0.467681	-0.371401	1.46442e-07
ENSBTAG00000001793	HSD11B1L	Chr7	18616460	7:17675650:A:C	Chr7	17675650	A	C	0.301136	-0.376862	0.0106241
ENSBTAG00000001790	SAFB2	Chr7	18682928	7:18676149:G:A	Chr7	18676149	A	G	0.359848	0.32843	4.74967e-10
ENSBTAG00000015487	KDM4B	Chr7	19175953	7:19391657:G:A	Chr7	19391657	A	G	0.310606	0.241119	6.68237e-11
ENSBTAG00000002224	UHRF1	Chr7	19257053	7:19318406:TG:T	Chr7	19318406	TG	T	0.274621	4.72849e-07	1.31057e-19
ENSBTAG00000011805	PLIN3	Chr7	19291175	7:19300275:A:G	Chr7	19300275	A	G	0.331439	-0.0783108	0.0151183
ENSBTAG00000003476	FEM1A	Chr7	19357132	7:19402007:AT:A	Chr7	19402007	AT	A	0.193182	-0.408149	2.97694e-09
ENSBTAG00000038464	PLIN5	Chr7	19600449	7:19592873:A:AG	Chr7	19592873	A	AG	0.325758	0.246702	3.99857e-05
ENSBTAG00000006005	MPND	Chr7	19744478	7:19846227:G:C	Chr7	19846227	G	C	0.195076	0.377072	0.00618347
ENSBTAG00000006001	STAP2	Chr7	19749299	7:19748178:T:A	Chr7	19748178	T	A	0.390152	0.0764496	6.68236e-05
ENSBTAG00000019909	SIRT6	Chr7	19856912	7:19589511:G:A	Chr7	19589511	G	A	0.106061	0.936609	8.11054e-08
ENSBTAG00000008396	MRPL54	Chr7	20212341	7:20081889:C:T	Chr7	20081889	C	T	0.126894	-0.303149	0.00791909
ENSBTAG00000018342	TJP3	Chr7	20252247	7:20363462:TTTTTG:T	Chr7	20363462	TTTTTG	T	0.450758	0.313016	2.5476e-05
ENSBTAG00000008789	HMG20B	Chr7	20358586	7:20686199:A:G	Chr7	20686199	A	G	0.153409	0.339773	0.00525649
ENSBTAG00000014979	MFSD12	Chr7	20369008	7:20695138:G:A	Chr7	20695138	G	A	0.195076	-0.162816	0.005316
ENSBTAG00000054259	NA	Chr7	20437393	7:20683050:G:A	Chr7	20683050	A	G	0.225379	-0.411838	0.00824659
ENSBTAG00000012868	NA	Chr7	20811788	7:20828882:A:G	Chr7	20828882	A	G	0.486742	-0.425511	0.000142091
ENSBTAG00000008397	ZNF555	Chr7	20853001	7:20890113:G:A	Chr7	20890113	A	G	0.475379	0.175119	1.22075e-06
ENSBTAG00000013624	LMNB2	Chr7	21133348	7:21219130:C:T	Chr7	21219130	C	T	0.0265152	-0.467175	0.014267
ENSBTAG00000001647	PLEKHJ1	Chr7	21391998	7:21416697:G:A	Chr7	21416697	G	A	0.172348	0.3538	0.00168685
ENSBTAG00000009034	AP3D1	Chr7	21413768	7:21497232:C:G	Chr7	21497232	G	C	0.480843	0.150421	0.00117566
ENSBTAG00000014526	MOB3A	Chr7	21451866	7:21254814:CG:C	Chr7	21254814	CG	C	0.429924	0.277204	0.0130164
ENSBTAG00000025477	KIF3A	Chr7	21600406	7:21951450:T:C	Chr7	21951450	T	C	0.183712	0.279234	0.000944126
ENSBTAG00000031209	SLC22A4	Chr7	22130086	7:22049369:T:C	Chr7	22049369	C	T	0.172348	0.485824	0.00948718
ENSBTAG00000019708	ACSL6	Chr7	22477892	7:22491950:C:G	Chr7	22491950	C	G	0.439394	0.869861	7.51122e-21
ENSBTAG00000005961	CDC42SE2	Chr7	23192277	7:22594656:G:T	Chr7	22594656	G	T	0.412879	0.240238	0.000234777
ENSBTAG00000010959	HINT1	Chr7	23271325	7:23379858:C:A	Chr7	23379858	C	A	0.424242	0.289681	2.01306e-13
ENSBTAG00000000341	ISOC1	Chr7	24993919	7:24994045:C:T	Chr7	24994045	C	T	0.0208333	-0.572512	1.27317e-08
ENSBTAG00000004860	SLC27A6	Chr7	25117897	7:25239359:C:T	Chr7	25239359	C	T	0.155303	-0.695856	6.47336e-24
ENSBTAG00000021977	PRRC1	Chr7	26467627	7:26492995:T:C	Chr7	26492995	T	C	0.195076	-0.216523	0.00287907
ENSBTAG00000017835	C7H5orf63	Chr7	26915950	7:26801569:G:A	Chr7	26801569	G	A	0.113636	0.649484	0.000207462
ENSBTAG00000002882	LMNB1	Chr7	27175858	7:26348560:T:C	Chr7	26348560	T	C	0.382576	0.118516	0.00417883
ENSBTAG00000009647	PHAX	Chr7	27278334	7:27203534:C:T	Chr7	27203534	C	T	0.13447	-0.296593	0.0065307
ENSBTAG00000009646	ALDH7A1	Chr7	27282165	7:27289212:C:T	Chr7	27289212	C	T	0.193182	-0.453365	4.09524e-15
ENSBTAG00000054786	NA	Chr7	30108438	7:30746823:T:TG	Chr7	30746823	T	TG	0.0492424	0.486362	0.016777
ENSBTAG00000013184	CEP120	Chr7	30358004	7:30358405:C:G	Chr7	30358405	G	C	0.373106	0.37065	3.06376e-07
ENSBTAG00000031069	SNX24	Chr7	30977434	7:31001653:C:T	Chr7	31001653	T	C	0.289773	-0.470094	1.04001e-08
ENSBTAG00000025358	SNX2	Chr7	31052612	7:31045419:A:G	Chr7	31045419	G	A	0.486742	0.170515	3.23074e-15
ENSBTAG00000021971	SNCAIP	Chr7	31541086	7:31317224:C:T	Chr7	31317224	C	T	0.488636	-0.158207	0.00408008
ENSBTAG00000050473	PRR16	Chr7	33388684	7:33547076:T:A	Chr7	33547076	T	A	0.320076	0.400881	0.00262076
ENSBTAG00000003047	FAM170A	Chr7	34241776	7:34494102:TTCTC:T	Chr7	34494102	TTCTC	T	0.0359848	1.24283	8.81986e-09
ENSBTAG00000006978	HSD17B4	Chr7	34425552	7:34209419:G:A	Chr7	34209419	G	A	0.38447	-0.325137	7.65387e-16
ENSBTAG00000014551	TNFAIP8	Chr7	34609385	7:34463749:A:T	Chr7	34463749	A	T	0.344697	-0.421008	1.13033e-07
ENSBTAG00000006748	DMXL1	Chr7	34761975	7:34115307:C:T	Chr7	34115307	C	T	0.392045	-0.327588	3.14278e-05
ENSBTAG00000002143	DTWD2	Chr7	34850844	7:35290385:C:T	Chr7	35290385	T	C	0.185606	0.456999	0.000297415
ENSBTAG00000054664	NA	Chr7	37573463	7:37585459:T:C	Chr7	37585459	C	T	0.214015	0.784257	8.47871e-07
ENSBTAG00000010735	HIGD2A	Chr7	37856221	7:37452301:C:A	Chr7	37452301	A	C	0.356061	-0.266786	0.00076266
ENSBTAG00000025340	CDHR2	Chr7	38024336	7:38081879:TC:T	Chr7	38081879	T	TC	0.291667	-0.423738	8.98582e-05
ENSBTAG00000044035	GPRIN1	Chr7	38073091	7:37352442:T:G	Chr7	37352442	T	G	0.166667	0.312619	0.0138538
ENSBTAG00000017451	TSPAN17	Chr7	38116058	7:38129977:G:A	Chr7	38129977	A	G	0.0757576	0.482801	0.0110192
ENSBTAG00000014898	HK3	Chr7	38352118	7:38381984:T:G	Chr7	38381984	G	T	0.306818	0.329661	0.000116117
ENSBTAG00000010543	FGFR4	Chr7	38575411	7:38456758:T:C	Chr7	38456758	T	C	0.289773	0.435479	2.79838e-05
ENSBTAG00000025425	RAB24	Chr7	38775449	7:38775718:C:G	Chr7	38775718	G	C	0.465909	-0.217493	0.00168389
ENSBTAG00000008034	LMAN2	Chr7	38849952	7:39243566:A:T	Chr7	39243566	A	T	0.270833	-2.55379e-07	5.36749e-10
ENSBTAG00000008497	RGS14	Chr7	38857590	7:38843537:A:G	Chr7	38843537	G	A	0.488636	-0.211974	0.000177617
ENSBTAG00000018872	F12	Chr7	38910067	7:38992548:G:A	Chr7	38992548	G	A	0.346591	0.313483	1.30452e-10
ENSBTAG00000015187	DDX41	Chr7	39017080	7:39031298:T:A	Chr7	39031298	A	T	0.0643939	0.657616	0.00499879
ENSBTAG00000006374	NHP2	Chr7	39247998	7:40002029:T:A	Chr7	40002029	T	A	0.337121	0.195785	0.00608407
ENSBTAG00000013628	PHYKPL	Chr7	39312475	7:39305198:T:C	Chr7	39305198	C	T	0.484848	0.295838	6.77395e-08
ENSBTAG00000039711	ZFP62	Chr7	40049928	7:39766821:T:A	Chr7	39766821	A	T	0.340909	-0.261831	0.00136519
ENSBTAG00000047420	BTNL9	Chr7	40086628	7:40222139:G:C	Chr7	40222139	G	C	0.0454545	-0.775388	0.000446625
ENSBTAG00000020954	TRIM7	Chr7	40341657	7:40341304:C:G	Chr7	40341304	C	G	0.185606	0.827878	3.96419e-22
ENSBTAG00000019646	TRIM41	Chr7	40360505	7:40369526:TC:T	Chr7	40369526	TC	T	0.215909	0.519457	1.34693e-07
ENSBTAG00000019648	RACK1	Chr7	40375831	7:40369526:TC:T	Chr7	40369526	TC	T	0.215909	0.102915	0.00619246
ENSBTAG00000019651	TRIM52	Chr7	40389581	7:40360157:T:G	Chr7	40360157	T	G	0.258555	-0.569548	2.12327e-05
ENSBTAG00000004815	NA	Chr7	40439818	7:40602279:T:C	Chr7	40602279	T	C	0.42803	-0.205331	1.88688e-15
ENSBTAG00000015727	IFI47	Chr7	40475731	7:40473562:ACTTCTCCTCTCTTTCCCTTTCTTTCTCCAG:A	Chr7	40473562	ACTTCTCCTCTCTTTCCCTTTCTTTCTCCAG	A	0.454545	-1.86819e-07	2.55521e-18
ENSBTAG00000049098	ZNF496	Chr7	40613838	7:40996620:G:A	Chr7	40996620	G	A	0.395833	-0.204729	0.000135996
ENSBTAG00000046984	ZNF672	Chr7	42627862	7:42604598:C:A	Chr7	42604598	C	A	0.335227	0.63371	3.22367e-08
ENSBTAG00000021115	ZNF692	Chr7	42639054	7:42607858:A:AT	Chr7	42607858	A	AT	0.297348	0.445727	0.017512
ENSBTAG00000019814	PGBD2	Chr7	42726725	7:42709699:G:A	Chr7	42709699	G	A	0.359848	0.377652	4.45051e-05
ENSBTAG00000000717	PLPP2	Chr7	43028554	7:42795316:T:TGTGC	Chr7	42795316	T	TGTGC	0.191288	0.294033	0.000393715
ENSBTAG00000002098	CDC34	Chr7	43173661	7:43180629:C:G	Chr7	43180629	C	G	0.452652	0.187613	1.36636e-07
ENSBTAG00000002100	GZMM	Chr7	43181977	7:43935553:G:A	Chr7	43935553	A	G	0.218631	-0.303885	0.000567896
ENSBTAG00000016648	BSG	Chr7	43201563	7:43307577:A:AT	Chr7	43307577	AT	A	0.246212	-0.209222	5.32923e-07
ENSBTAG00000015050	HCN2	Chr7	43213784	7:43182697:G:GC	Chr7	43182697	G	GC	0.227273	-0.25269	7.02272e-12
ENSBTAG00000046406	R3HDM4	Chr7	43449545	7:44366399:A:G	Chr7	44366399	G	A	0.166667	-0.416375	0.0078841
ENSBTAG00000002434	WDR18	Chr7	43504778	7:43501047:G:A	Chr7	43501047	A	G	0.245247	0.313763	1.98919e-05
ENSBTAG00000011639	STK11	Chr7	43656059	7:43573739:G:A	Chr7	43573739	G	A	0.464015	-0.566926	4.71902e-09
ENSBTAG00000051357	C7H19orf25	Chr7	43883085	7:44026538:A:G	Chr7	44026538	G	A	0.475379	-0.592385	8.48599e-08
ENSBTAG00000038409	MBD3	Chr7	43968745	7:43966676:C:T	Chr7	43966676	C	T	0.308712	-0.260509	0.000252149
ENSBTAG00000008695	TCF3	Chr7	44015020	7:43260897:G:T	Chr7	43260897	T	G	0.244318	-0.296714	0.00524428
ENSBTAG00000045762	SCAMP4	Chr7	44220151	7:43279517:GCCAGCTGCCCGCGCGTCCGA:G	Chr7	43279517	GCCAGCTGCCCGCGCGTCCGA	G	0.227273	0.301449	0.0190612
ENSBTAG00000016108	BTBD2	Chr7	44302294	7:44152934:G:A	Chr7	44152934	G	A	0.469349	0.391414	6.11686e-10
ENSBTAG00000015683	HSPA4	Chr7	44607162	7:44377029:A:C	Chr7	44377029	C	A	0.435606	-0.191865	0.000353568
ENSBTAG00000013112	C7H5orf15	Chr7	45661066	7:46353135:ATTT:A	Chr7	46353135	ATTT	A	0.030303	-0.64481	0.010554
ENSBTAG00000021226	SAR1B	Chr7	46163331	7:46572498:G:A	Chr7	46572498	G	A	0.0627376	-0.134815	0.00809189
ENSBTAG00000014744	TXNDC15	Chr7	46354702	7:46253300:C:T	Chr7	46253300	C	T	0.130682	0.19485	3.63927e-05
ENSBTAG00000006694	CXCL14	Chr7	47078939	7:47041494:C:A	Chr7	47041494	A	C	0.335227	-0.326059	9.94202e-06
ENSBTAG00000018287	SLC25A48	Chr7	47265963	7:47294793:G:A	Chr7	47294793	G	A	0.395833	-0.313638	2.06825e-10
ENSBTAG00000025182	FBXL21	Chr7	47371700	7:47383539:C:G	Chr7	47383539	C	G	0.301136	-0.645427	8.76916e-07
ENSBTAG00000001247	LECT2	Chr7	47404408	7:47499335:C:T	Chr7	47499335	C	T	0.282197	-0.244306	1.64779e-07
ENSBTAG00000009513	TGFBI	Chr7	47430705	7:47368145:GGC:G	Chr7	47368145	G	GGC	0.340909	-0.313967	0.000225238
ENSBTAG00000054397	NA	Chr7	47562260	7:46571387:T:C	Chr7	46571387	C	T	0.356061	0.458978	0.00210996
ENSBTAG00000002796	KLHL3	Chr7	49190970	7:49245352:A:G	Chr7	49245352	G	A	0.454545	-0.222149	0.0128171
ENSBTAG00000042256	SNORA74	Chr7	50584708	7:51239459:G:A	Chr7	51239459	G	A	0.0643939	1.02561	0.00744818
ENSBTAG00000017957	SPATA24	Chr7	50675970	7:50568738:C:T	Chr7	50568738	C	T	0.0606061	0.548676	0.0057686
ENSBTAG00000004161	UBE2D2	Chr7	50789408	7:51378175:T:C	Chr7	51378175	T	C	0.0833333	1.14857	0.00158697
ENSBTAG00000015032	CD14	Chr7	51765768	7:51327100:C:G	Chr7	51327100	G	C	0.371212	-0.186299	0.000136096
ENSBTAG00000015041	NDUFA2	Chr7	51780743	7:51741579:C:T	Chr7	51741579	C	T	0.498106	-0.26736	2.34815e-12
ENSBTAG00000025212	HARS2	Chr7	51817095	7:51858856:C:CT	Chr7	51858856	C	CT	0.100379	0.988357	6.53586e-05
ENSBTAG00000005441	ZMAT2	Chr7	51825589	7:51933552:A:C	Chr7	51933552	A	C	0.435606	-0.254425	7.07375e-05
ENSBTAG00000053546	PCDHAC2	Chr7	52009934	7:52203825:A:AC	Chr7	52203825	A	AC	0.151515	0.597168	4.66372e-07
ENSBTAG00000017349	PCDHGC3	Chr7	52469411	7:53089213:G:A	Chr7	53089213	G	A	0.206439	0.49001	4.25124e-07
ENSBTAG00000017360	HDAC3	Chr7	52730098	7:52395866:G:A	Chr7	52395866	G	A	0.0606061	0.477628	3.2215e-09
ENSBTAG00000015938	ARAP3	Chr7	52773654	7:52378531:A:G	Chr7	52378531	A	G	0.24053	-0.297695	0.00246854
ENSBTAG00000012518	PCDH1	Chr7	52958465	7:53877198:GTGCTGC:G	Chr7	53877198	GTGCTGC	G	0.0340909	-0.37428	0.00630105
ENSBTAG00000008435	DELE1	Chr7	52987585	7:52939724:G:C	Chr7	52939724	C	G	0.477273	0.265421	0.00801155
ENSBTAG00000005249	RNF14	Chr7	53035570	7:53148798:TCG:T	Chr7	53148798	TCG	T	0.219697	0.375782	1.00394e-10
ENSBTAG00000007865	GNPDA1	Chr7	53077719	7:53971652:G:A	Chr7	53971652	G	A	0.376894	0.362431	0.00010574
ENSBTAG00000044169	PRELID2	Chr7	57021301	7:57016646:G:T	Chr7	57016646	T	G	0.397727	-0.424837	1.70499e-05
ENSBTAG00000006765	LARS1	Chr7	57397980	7:57538084:C:T	Chr7	57538084	T	C	0.462121	3.34119e-07	2.09814e-09
ENSBTAG00000001862	PPP2R2B	Chr7	58305705	7:58177511:T:C	Chr7	58177511	T	C	0.181818	0.305509	0.0151509
ENSBTAG00000003349	JAKMIP2	Chr7	59006616	7:58849841:C:CACCTCTT	Chr7	58849841	CACCTCTT	C	0.346591	-4.28109e-07	1.15173e-09
ENSBTAG00000002144	ADRB2	Chr7	60232707	7:60196400:C:T	Chr7	60196400	T	C	0.104167	0.819244	0.000682319
ENSBTAG00000019951	PCYOX1L	Chr7	60754589	7:60663710:G:C	Chr7	60663710	G	C	0.0833333	-0.455584	0.00514256
ENSBTAG00000010578	IL17B	Chr7	60777637	7:61312741:C:A	Chr7	61312741	C	A	0.168561	1.01396	1.6486e-07
ENSBTAG00000053457	NA	Chr7	60805404	7:60796704:T:C	Chr7	60796704	T	C	0.132576	0.983709	4.10533e-08
ENSBTAG00000015419	ARHGEF37	Chr7	60928104	7:60962242:G:T	Chr7	60962242	G	T	0.410985	0.182571	3.55755e-07
ENSBTAG00000012771	CSF1R	Chr7	61411558	7:60997677:C:T	Chr7	60997677	C	T	0.234848	0.246719	2.01309e-05
ENSBTAG00000012671	TNIP1	Chr7	62337815	7:61849445:C:T	Chr7	61849445	C	T	0.278409	0.342873	0.0083463
ENSBTAG00000021829	GM2A	Chr7	62495948	7:62538927:A:T	Chr7	62538927	A	T	0.479167	0.326341	3.64503e-05
ENSBTAG00000008340	ATOX1	Chr7	62957525	7:63021176:T:G	Chr7	63021176	T	G	0.363636	0.263915	6.16598e-11
ENSBTAG00000052642	NA	Chr7	62972359	7:63017741:T:C	Chr7	63017741	T	C	0.246212	0.389031	3.87428e-07
ENSBTAG00000017078	FAM114A2	Chr7	65330574	7:65314282:T:C	Chr7	65314282	C	T	0.357955	-0.234023	0.00339959
ENSBTAG00000012095	GEMIN5	Chr7	66104566	7:66291633:A:G	Chr7	66291633	A	G	0.157197	-3.77294e-07	6.95314e-15
ENSBTAG00000019457	MRPL22	Chr7	66108779	7:66117914:A:G	Chr7	66117914	G	A	0.19697	-0.543841	1.35697e-11
ENSBTAG00000030297	NA	Chr7	68202027	7:68235795:G:GT	Chr7	68235795	G	GT	0.433712	0.507926	1.21532e-22
ENSBTAG00000013185	TIMD4	Chr7	68314227	7:68868905:G:A	Chr7	68868905	G	A	0.183712	0.190778	0.000158717
ENSBTAG00000008916	CYFIP2	Chr7	68943177	7:68867460:A:C	Chr7	68867460	A	C	0.373106	0.25475	0.0123746
ENSBTAG00000010321	TTC1	Chr7	71598515	7:71586664:G:A	Chr7	71586664	G	A	0.132576	-0.367193	0.000312787
ENSBTAG00000016841	ATP10B	Chr7	72358789	7:72677363:C:T	Chr7	72677363	T	C	0.337121	0.302939	2.37365e-15
ENSBTAG00000006607	CCNG1	Chr7	75115946	7:75491438:TTGAC:T	Chr7	75491438	TTGAC	T	0.0909091	0.655409	1.49709e-07
ENSBTAG00000014626	RARS1	Chr7	80503645	7:80729197:T:TAC	Chr7	80729197	T	TAC	0.0416667	0.195894	0.0140787
ENSBTAG00000021577	ZFYVE16	Chr7	80569079	7:80367794:G:A	Chr7	80367794	G	A	0.340909	0.473285	1.47296e-10
ENSBTAG00000007632	FAM151B	Chr7	80632984	7:80691994:AG:A	Chr7	80691994	A	AG	0.306818	-0.441357	1.09905e-13
ENSBTAG00000007681	DHFR	Chr7	80748878	7:81235596:C:T	Chr7	81235596	T	C	0.251894	-0.156295	0.0103472
ENSBTAG00000007684	MSH3	Chr7	80748982	7:81529939:ATGAAAGTGAAAAG:A	Chr7	81529939	ATGAAAGTGAAAAG	A	0.0435606	-0.792439	6.72712e-05
ENSBTAG00000005265	ZCCHC9	Chr7	81294848	7:81280175:C:T	Chr7	81280175	C	T	0.107955	-0.377008	0.000732543
ENSBTAG00000011110	ACOT12	Chr7	81354584	7:81251536:C:T	Chr7	81251536	C	T	0.11553	0.362164	3.73062e-06
ENSBTAG00000013358	RPS23	Chr7	82219272	7:82218516:C:CA	Chr7	82218516	CA	C	0.19697	-0.584985	1.46874e-20
ENSBTAG00000050733	ATP6AP1L	Chr7	82240253	7:82219445:A:G	Chr7	82219445	A	G	0.375	-0.747187	1.86912e-10
ENSBTAG00000039591	TMEM167A	Chr7	82958724	7:82738351:T:C	Chr7	82738351	T	C	0.229167	0.319604	2.68772e-10
ENSBTAG00000014906	VCAN	Chr7	83356441	7:84323959:A:G	Chr7	84323959	A	G	0.405303	0.252487	0.00645915
ENSBTAG00000039555	NA	Chr7	86288718	7:86335775:CT:C	Chr7	86335775	C	CT	0.467803	-0.365408	1.34499e-13
ENSBTAG00000013612	MBLAC2	Chr7	90037230	7:89988214:A:G	Chr7	89988214	G	A	0.409091	0.268868	0.00281028
ENSBTAG00000006031	ADGRV1	Chr7	90154321	7:90388938:A:G	Chr7	90388938	G	A	0.494318	0.144348	0.0011304
ENSBTAG00000050195	FAM172A	Chr7	93506932	7:93673649:T:A	Chr7	93673649	T	A	0.456439	0.367841	8.2303e-07
ENSBTAG00000003144	KIAA0825	Chr7	93911993	7:94186856:A:G	Chr7	94186856	G	A	0.316288	-2.56066e-07	0.00012392
ENSBTAG00000009131	TTC37	Chr7	94860268	7:95035030:G:A	Chr7	95035030	A	G	0.106061	0.511169	7.7691e-05
ENSBTAG00000020178	ARSK	Chr7	94867667	7:94867694:G:C	Chr7	94867694	G	C	0.0984849	-0.785025	8.73047e-21
ENSBTAG00000007231	SPATA9	Chr7	95003346	7:95036135:AC:A	Chr7	95036135	A	AC	0.206439	-0.434894	7.92123e-08
ENSBTAG00000004413	RHOBTB3	Chr7	95035647	7:95036135:AC:A	Chr7	95036135	A	AC	0.206439	0.258015	0.000684419
ENSBTAG00000038186	GLRX	Chr7	95132776	7:94883857:G:A	Chr7	94883857	A	G	0.253788	-0.415769	2.72555e-13
ENSBTAG00000000874	CAST	Chr7	96033979	7:96063462:C:T	Chr7	96063462	C	T	0.465909	-3.70816e-07	8.09336e-08
ENSBTAG00000013557	ERAP1	Chr7	96204132	7:96299879:T:G	Chr7	96299879	T	G	0.397727	-4.45495e-07	1.06871e-20
ENSBTAG00000039275	ERAP2	Chr7	96303405	7:96339731:C:T	Chr7	96339731	T	C	0.426136	0.327684	7.57925e-20
ENSBTAG00000011864	RGMB	Chr7	98014275	7:98006378:G:A	Chr7	98006378	G	A	0.399621	0.487342	4.86786e-14
ENSBTAG00000020860	CHD1	Chr7	98154532	7:98115641:A:G	Chr7	98115641	A	G	0.1875	-0.227348	0.00517033
ENSBTAG00000045909	FAM174A	Chr7	99808417	7:99831600:A:T	Chr7	99831600	A	T	0.246212	-0.442065	6.17651e-08
ENSBTAG00000016359	SLCO4C1	Chr7	101354602	7:101302053:A:G	Chr7	101302053	A	G	0.272727	0.375742	1.53678e-07
ENSBTAG00000012387	PAM	Chr7	101896776	7:101693462:TG:T	Chr7	101693462	TG	T	0.104167	0.362419	0.000107128
ENSBTAG00000055286	MACIR	Chr7	102269274	7:102679358:G:GGGGTGGCAGA	Chr7	102679358	G	GGGGTGGCAGA	0.484848	0.263098	0.000332555
ENSBTAG00000027727	NA	Chr7	102595016	7:101862830:A:C	Chr7	101862830	A	C	0.100379	0.274485	0.0035303
ENSBTAG00000027728	NUDT12	Chr7	102621109	7:102598925:C:T	Chr7	102598925	C	T	0.30303	0.139425	4.55195e-06
ENSBTAG00000016515	EFNA5	Chr7	106784981	7:106361170:TTTATTCTGG:T	Chr7	106361170	TTTATTCTGG	T	0.25	0.493689	4.33489e-11
ENSBTAG00000054662	FBXL17	Chr7	107509243	7:107503690:G:GA	Chr7	107503690	GA	G	0.335227	0.400363	0.00032434
ENSBTAG00000021675	PJA2	Chr7	108492509	7:108476015:C:A	Chr7	108476015	A	C	0.170455	0.29157	0.0172111
ENSBTAG00000051701	NA	Chr7	108582346	7:108529077:T:C	Chr7	108529077	T	C	0.295455	-0.526853	2.23875e-16
ENSBTAG00000025029	MAN2A1	Chr7	108794484	7:108957951:G:T	Chr7	108957951	T	G	0.439394	0.199804	0.000797972
ENSBTAG00000050867	NA	Chr7	109254549	7:109140053:T:A	Chr7	109140053	T	A	0.488636	-0.444635	2.7136e-05
ENSBTAG00000051875	NA	Chr7	109307589	7:109125460:A:G	Chr7	109125460	G	A	0.488636	-0.535747	9.08027e-10
ENSBTAG00000030198	TMEM232	Chr7	109728291	7:109693521:G:C	Chr7	109693521	G	C	0.255682	-0.414236	0.000920712
ENSBTAG00000009667	SLC25A46	Chr7	109738261	7:109712960:T:C	Chr7	109712960	C	T	0.44697	-0.630777	2.96224e-11
ENSBTAG00000045886	STARD4	Chr7	110591417	7:110570887:T:C	Chr7	110570887	C	T	0.481061	0.279657	1.1536e-13
ENSBTAG00000003124	MFSD14B	Chr8	244185	8:368456:G:A	Chr8	368456	G	A	0.375	0.412869	7.85908e-15
ENSBTAG00000001081	PALLD	Chr8	702607	8:899981:A:G	Chr8	899981	A	G	0.183712	-0.352622	0.000696622
ENSBTAG00000022013	CBR4	Chr8	1107894	8:1107405:T:G	Chr8	1107405	T	G	0.100379	0.305979	7.02684e-08
ENSBTAG00000001508	SH3RF1	Chr8	1318002	8:1745094:T:C	Chr8	1745094	T	C	0.200758	0.275294	0.00189508
ENSBTAG00000026915	NEK1	Chr8	1532028	8:1414178:GA:G	Chr8	1414178	GA	G	0.176136	-0.326402	6.93327e-07
ENSBTAG00000020130	CLCN3	Chr8	1549321	8:1513586:T:C	Chr8	1513586	T	C	0.0549242	-0.453723	0.00966095
ENSBTAG00000020132	HPF1	Chr8	1666699	8:2630615:C:T	Chr8	2630615	C	T	0.0776515	0.513769	3.0494e-05
ENSBTAG00000050967	AADAT	Chr8	1952612	8:1952881:T:G	Chr8	1952881	G	T	0.498106	0.46919	2.14747e-22
ENSBTAG00000016845	GALNT7	Chr8	5591835	8:6067078:G:A	Chr8	6067078	G	A	0.270833	0.341441	0.00572369
ENSBTAG00000015101	HMGB2	Chr8	5737485	8:5628514:G:T	Chr8	5628514	G	T	0.136364	-0.512693	7.73131e-07
ENSBTAG00000020055	CEP44	Chr8	6597010	8:6610361:G:A	Chr8	6610361	A	G	0.464015	0.184683	0.00431752
ENSBTAG00000025942	HPGD	Chr8	6824508	8:6906372:CT:C	Chr8	6906372	C	CT	0.386364	-0.255204	9.28897e-13
ENSBTAG00000012442	CTSB	Chr8	7566096	8:8325202:A:C	Chr8	8325202	A	C	0.409091	0.269157	0.000447105
ENSBTAG00000012432	FDFT1	Chr8	7617546	8:7634897:A:G	Chr8	7634897	A	G	0.263258	0.226257	2.37814e-05
ENSBTAG00000004769	NEIL2	Chr8	7636935	8:7619549:C:T	Chr8	7619549	C	T	0.25	7.59636e-07	1.4062e-14
ENSBTAG00000019066	FAM167A	Chr8	7897348	8:7532687:G:C	Chr8	7532687	G	C	0.348485	0.137915	0.00622369
ENSBTAG00000000011	TDH	Chr8	7971600	8:7986735:TTTTTG:T	Chr8	7986735	TTTTTG	T	0.151515	0.303756	3.65797e-08
ENSBTAG00000003726	MTMR9	Chr8	8064000	8:8067080:T:C	Chr8	8067080	T	C	0.44697	-0.365539	3.03747e-20
ENSBTAG00000021632	MSRA	Chr8	9169658	8:9169228:T:A	Chr8	9169228	T	A	0.162879	-0.16612	0.0159897
ENSBTAG00000017232	KIF13B	Chr8	9440964	8:9597044:T:TTC	Chr8	9597044	TTC	T	0.340909	0.101986	0.00825204
ENSBTAG00000008845	INTS9	Chr8	9840508	8:9803957:A:G	Chr8	9803957	A	G	0.299242	0.429399	8.71656e-10
ENSBTAG00000008844	EXTL3	Chr8	10017423	8:9889937:T:TAGC	Chr8	9889937	T	TAGC	0.378788	-0.329595	0.0196091
ENSBTAG00000035084	FZD3	Chr8	10238564	8:10443441:T:C	Chr8	10443441	T	C	0.380682	0.448124	2.69513e-05
ENSBTAG00000002730	ELP3	Chr8	10712508	8:10598498:C:T	Chr8	10598498	C	T	0.0587121	-0.651257	0.00226
ENSBTAG00000011321	NUGGC	Chr8	10720464	8:9744730:TTTTTTTC:T	Chr8	9744730	TTTTTTTC	T	0.168561	0.275864	0.00104729
ENSBTAG00000019636	SCARA5	Chr8	10796506	8:10878372:C:A	Chr8	10878372	C	A	0.219697	0.55686	4.70241e-05
ENSBTAG00000005574	CLU	Chr8	11176839	8:11204559:C:T	Chr8	11204559	C	T	0.221591	-0.292073	3.80486e-05
ENSBTAG00000003366	DDX58	Chr8	11559626	8:11344045:G:A	Chr8	11344045	G	A	0.399621	-0.312905	0.00331877
ENSBTAG00000000555	ACO1	Chr8	11674522	8:11658169:T:C	Chr8	11658169	C	T	0.471591	0.159026	8.6331e-05
ENSBTAG00000000804	MOB3B	Chr8	16757262	8:16746350:G:A	Chr8	16746350	A	G	0.130682	0.534975	0.000649909
ENSBTAG00000019568	IFT74	Chr8	17277618	8:16545018:T:C	Chr8	16545018	T	C	0.482955	-0.361717	0.00480775
ENSBTAG00000013011	PLAA	Chr8	17280447	8:17292338:T:G	Chr8	17292338	T	G	0.145833	0.701124	0.00158865
ENSBTAG00000046348	ELAVL2	Chr8	20303381	8:20601317:A:C	Chr8	20601317	A	C	0.212121	0.211972	0.000771365
ENSBTAG00000017741	HACD4	Chr8	23375119	8:23414254:G:C	Chr8	23414254	G	C	0.106061	4.8353e-07	2.44446e-10
ENSBTAG00000038181	FOCAD	Chr8	23725195	8:23876107:A:C	Chr8	23876107	A	C	0.464015	-0.453668	4.49428e-07
ENSBTAG00000003097	DENND4C	Chr8	25040129	8:24854784:A:T	Chr8	24854784	T	A	0.248106	-0.416126	9.33793e-06
ENSBTAG00000014103	SH3GL2	Chr8	26826372	8:26310465:C:G	Chr8	26310465	C	G	0.231061	0.376214	0.00817492
ENSBTAG00000001847	CNTLN	Chr8	27246452	8:27116502:G:A	Chr8	27116502	A	G	0.179924	-0.287569	0.0183508
ENSBTAG00000015788	CCDC171	Chr8	28755648	8:28572331:TG:T	Chr8	28572331	TG	T	0.327652	0.315404	0.00418036
ENSBTAG00000007872	PSIP1	Chr8	28792831	8:28688392:A:C	Chr8	28688392	A	C	0.484848	-0.293043	3.38746e-06
ENSBTAG00000010178	PTPRD	Chr8	36145266	8:36187742:G:C	Chr8	36187742	C	G	0.410985	-0.199187	5.22938e-08
ENSBTAG00000015963	DMAC1	Chr8	37095277	8:37100703:A:G	Chr8	37100703	G	A	0.359848	-0.416115	5.04938e-07
ENSBTAG00000017530	PLGRKT	Chr8	39279966	8:39279307:C:G	Chr8	39279307	C	G	0.246212	-0.263682	7.36214e-13
ENSBTAG00000012047	JAK2	Chr8	39499024	8:39464547:C:T	Chr8	39464547	C	T	0.3125	-0.308198	0.0141421
ENSBTAG00000018667	RCL1	Chr8	39743532	8:39719099:G:GA	Chr8	39719099	G	GA	0.278409	-0.101396	3.98089e-05
ENSBTAG00000017147	AK3	Chr8	39797197	8:40376149:A:C	Chr8	40376149	A	C	0.0700758	0.199198	0.0140984
ENSBTAG00000011050	PLPP6	Chr8	39864933	8:39864916:T:TAAG	Chr8	39864916	TAAG	T	0.36692	0.394525	0.000913262
ENSBTAG00000019125	SLC1A1	Chr8	40003010	8:40094645:C:T	Chr8	40094645	T	C	0.335227	0.303014	3.09262e-08
ENSBTAG00000052736	NA	Chr8	40192990	8:40039946:A:G	Chr8	40039946	A	G	0.210227	0.532125	1.04898e-14
ENSBTAG00000014467	NA	Chr8	40574217	8:40055820:G:A	Chr8	40055820	G	A	0.210227	0.567286	2.99356e-08
ENSBTAG00000013357	PUM3	Chr8	41655033	8:42376162:G:A	Chr8	42376162	G	A	0.164773	-0.506843	1.37458e-05
ENSBTAG00000002190	DOCK8	Chr8	44271335	8:44319670:T:G	Chr8	44319670	T	G	0.0700758	-0.289134	0.000707115
ENSBTAG00000000269	NA	Chr8	44298706	8:44337378:G:A	Chr8	44337378	G	A	0.25	0.173502	0.000114993
ENSBTAG00000001306	FXN	Chr8	45222655	8:45248106:T:A	Chr8	45248106	T	A	0.0340909	0.775258	0.0183463
ENSBTAG00000011173	FAM189A2	Chr8	45469517	8:45333296:C:T	Chr8	45333296	C	T	0.1875	-0.123004	2.72687e-05
ENSBTAG00000008877	APBA1	Chr8	45814041	8:46607039:C:CCA	Chr8	46607039	C	CCA	0.104167	0.212072	0.00785542
ENSBTAG00000017369	MAMDC2	Chr8	46233995	8:46339629:G:C	Chr8	46339629	G	C	0.231061	-0.332522	0.000125634
ENSBTAG00000018437	SMC5	Chr8	46411543	8:45821901:G:T	Chr8	45821901	T	G	0.431818	-0.335552	0.000748713
ENSBTAG00000011545	GDA	Chr8	48359128	8:48697815:A:G	Chr8	48697815	A	G	0.329545	0.165924	0.0115246
ENSBTAG00000009417	ZFAND5	Chr8	48599969	8:48551572:G:T	Chr8	48551572	T	G	0.409091	-0.324347	5.93157e-06
ENSBTAG00000008103	ALDH1A1	Chr8	49106706	8:49119122:C:T	Chr8	49119122	C	T	0.471591	-0.132313	1.70276e-14
[truncated: 4,175 more rows]

## Sheet: STable_S12-2_Blood_eQTL
Suppl. Table S12-2: A list of 7,817 significant cis-eQTL in blood.
Gene information				Variant information
Gene ID	Gene name	Chromosome of gene	TSS position of gene	Variant ID	Chromosome of variant	Variant position	REF	ALT	MAF	Beta	Adjusted p-valule
ENSBTAG00000020035	RCAN1	Chr1	882082	1:815748:C:T	Chr1	815748	C	T	0.223485	-0.712368	1.59514e-09
ENSBTAG00000011528	SMIM11A	Chr1	1118312	1:1120676:T:C	Chr1	1120676	T	C	0.337121	-0.252484	1.37287e-12
ENSBTAG00000012594	MRPS6	Chr1	1455219	1:1607592:G:A	Chr1	1607592	A	G	0.359848	0.140509	3.78339e-09
ENSBTAG00000021997	ITSN1	Chr1	1908788	1:1637192:C:T	Chr1	1637192	C	T	0.0208333	-0.293897	0.0214376
ENSBTAG00000008490	CRYZL1	Chr1	1909499	1:1217081:G:A	Chr1	1217081	G	A	0.0246212	-0.464126	1.22875e-06
ENSBTAG00000035175	DONSON	Chr1	1942816	1:1217081:G:A	Chr1	1217081	G	A	0.0246212	0.287561	7.79777e-07
ENSBTAG00000008482	SON	Chr1	1985068	1:1932058:G:T	Chr1	1932058	G	T	0.0397727	-0.376847	0.000307922
ENSBTAG00000009188	GART	Chr1	1985523	1:2088950:G:C	Chr1	2088950	G	C	0.306818	-0.173565	7.43094e-05
ENSBTAG00000009187	DNAJC28	Chr1	2028901	1:2046478:C:G	Chr1	2046478	C	G	0.352273	0.478139	7.82065e-12
ENSBTAG00000001258	TMEM50B	Chr1	2046734	1:2058866:T:C	Chr1	2058866	T	C	0.342803	0.076597	3.49234e-09
ENSBTAG00000043399	NA	Chr1	2089808	1:2090446:A:C	Chr1	2090446	A	C	0.4375	-0.334851	0.00139536
ENSBTAG00000012899	IFNGR2	Chr1	2124278	1:2218289:A:G	Chr1	2218289	G	A	0.362595	-0.151658	4.91468e-08
ENSBTAG00000021819	IFNAR1	Chr1	2218344	1:2218289:A:G	Chr1	2218289	G	A	0.362595	0.278487	7.27462e-34
ENSBTAG00000019404	IL10RB	Chr1	2314142	1:2293604:A:C	Chr1	2293604	C	A	0.361742	0.18014	3.03949e-25
ENSBTAG00000015212	IFNAR2	Chr1	2350090	1:2359218:T:C	Chr1	2359218	C	T	0.191288	0.227823	3.22581e-11
ENSBTAG00000003064	PAXBP1	Chr1	2786813	1:2749656:C:T	Chr1	2749656	T	C	0.488636	-0.0957541	5.72358e-05
ENSBTAG00000003063	SYNJ1	Chr1	2827692	1:2874634:G:C	Chr1	2874634	G	C	0.382576	-0.0932182	3.38453e-14
ENSBTAG00000003059	CFAP298	Chr1	2924657	1:2887102:T:TTG	Chr1	2887102	T	TTG	0.295455	0.370765	2.87077e-11
ENSBTAG00000017310	EVA1C	Chr1	3080528	1:3053665:T:C	Chr1	3053665	C	T	0.340909	-0.426341	1.42429e-11
ENSBTAG00000012412	URB1	Chr1	3103264	1:3110175:G:A	Chr1	3110175	A	G	0.261364	0.333204	1.1302e-07
ENSBTAG00000020762	HUNK	Chr1	3629427	1:3479709:T:C	Chr1	3479709	T	C	0.382576	-0.402275	0.000225958
ENSBTAG00000018854	SOD1	Chr1	3833406	1:3725816:G:C	Chr1	3725816	G	C	0.0475113	-0.224437	0.0271744
ENSBTAG00000017839	TIAM1	Chr1	4192105	1:3555857:A:G	Chr1	3555857	A	G	0.0852273	-0.179158	0.00480713
ENSBTAG00000048631	NA	Chr1	4381316	1:4887640:CA:C	Chr1	4887640	C	CA	0.316288	-0.140969	1.04581e-05
ENSBTAG00000004139	BACH1	Chr1	6858058	1:7044286:C:T	Chr1	7044286	C	T	0.253788	-0.125771	0.00349669
ENSBTAG00000020122	USP16	Chr1	7155271	1:7328099:T:C	Chr1	7328099	T	C	0.0246212	0.453502	0.000804777
ENSBTAG00000020121	RWDD2B	Chr1	7167842	1:7502268:A:C	Chr1	7502268	A	C	0.282197	0.281736	0.0135199
ENSBTAG00000000201	LTN1	Chr1	7183914	1:7220166:T:C	Chr1	7220166	C	T	0.390152	-0.14627	0.000121674
ENSBTAG00000038433	NA	Chr1	7246095	1:7221835:C:T	Chr1	7221835	T	C	0.390152	-0.344338	1.01739e-10
ENSBTAG00000017753	APP	Chr1	10231297	1:10105289:T:A	Chr1	10105289	T	A	0.248106	0.452381	3.93234e-15
ENSBTAG00000019542	MRPL39	Chr1	10823243	1:10881018:A:G	Chr1	10881018	A	G	0.274621	-0.308292	0.00582318
ENSBTAG00000003301	NCAM2	Chr1	15556567	1:15297251:C:T	Chr1	15297251	T	C	0.416667	0.280204	0.00549233
ENSBTAG00000001395	C1H21orf91	Chr1	19227895	1:19265988:C:T	Chr1	19265988	C	T	0.420455	0.27088	1.22955e-06
ENSBTAG00000018704	BTG3	Chr1	19417656	1:19457173:A:G	Chr1	19457173	A	G	0.335227	-0.185475	0.00977287
ENSBTAG00000004869	CXADR	Chr1	19502580	1:19488320:G:T	Chr1	19488320	G	T	0.335227	-0.302874	1.00961e-08
ENSBTAG00000019314	USP25	Chr1	21328190	1:21339193:T:C	Chr1	21339193	C	T	0.416667	0.158687	1.23629e-10
ENSBTAG00000047293	NRIP1	Chr1	22189816	1:22077452:T:C	Chr1	22077452	C	T	0.24053	0.139072	0.0176246
ENSBTAG00000054742	NA	Chr1	22280563	1:22296002:A:C	Chr1	22296002	C	A	0.295455	0.292992	3.89958e-07
ENSBTAG00000012908	HSPA13	Chr1	22783877	1:22237858:T:A	Chr1	22237858	T	A	0.181818	-0.678521	3.73646e-09
ENSBTAG00000054574	NA	Chr1	22906567	1:22906528:A:G	Chr1	22906528	A	G	0.32197	0.297567	1.64662e-17
ENSBTAG00000034347	RBM11	Chr1	22967236	1:23592838:GA:G	Chr1	23592838	G	GA	0.450758	-0.149335	0.000589699
ENSBTAG00000036262	GBE1	Chr1	29419066	1:28867710:TA:T	Chr1	28867710	TA	T	0.0511364	-0.735039	2.07899e-10
ENSBTAG00000007939	CHMP2B	Chr1	35381298	1:35610925:A:C	Chr1	35610925	C	A	0.424242	-0.105822	7.4696e-05
ENSBTAG00000046959	CGGBP1	Chr1	36063724	1:35837523:C:A	Chr1	35837523	A	C	0.0662879	0.139488	0.0118352
ENSBTAG00000023652	PROS1	Chr1	38267163	1:37807038:T:C	Chr1	37807038	T	C	0.221591	-0.18027	0.00979052
ENSBTAG00000015728	NSUN3	Chr1	38360630	1:38430950:G:A	Chr1	38430950	A	G	0.145833	0.209835	1.82102e-11
ENSBTAG00000010091	ARL6	Chr1	42010600	1:41994747:C:CT	Chr1	41994747	C	CT	0.471591	0.249889	2.62924e-06
ENSBTAG00000047147	CRYBG3	Chr1	42070369	1:41976581:A:T	Chr1	41976581	A	T	0.248106	-0.192459	0.0166273
ENSBTAG00000020996	CLDND1	Chr1	42830190	1:42691971:A:C	Chr1	42691971	C	A	0.172348	-0.228217	8.94955e-07
ENSBTAG00000004124	CPOX	Chr1	42901415	1:42901058:C:G	Chr1	42901058	G	C	0.367424	0.255626	1.46567e-07
ENSBTAG00000004471	ST3GAL6	Chr1	43047977	1:43058339:G:A	Chr1	43058339	G	A	0.125	0.0331863	0.000125008
ENSBTAG00000014889	DCBLD2	Chr1	43195312	1:42824238:C:G	Chr1	42824238	C	G	0.339015	0.16341	0.0114336
ENSBTAG00000015010	TBC1D23	Chr1	44554752	1:44533209:C:T	Chr1	44533209	C	T	0.0568182	0.164983	3.7655e-16
ENSBTAG00000004833	NIT2	Chr1	44617554	1:45365986:C:T	Chr1	45365986	C	T	0.151515	0.390075	0.00199808
ENSBTAG00000014302	TOMM70	Chr1	44687949	1:44637287:G:C	Chr1	44637287	G	C	0.0833333	0.315914	2.54547e-16
ENSBTAG00000034442	LNP1	Chr1	44688567	1:44637287:G:C	Chr1	44637287	G	C	0.0833333	0.502723	3.47938e-14
ENSBTAG00000018731	NA	Chr1	45964100	1:46906406:G:T	Chr1	46906406	G	T	0.0265152	0.460402	0.00340633
ENSBTAG00000016932	SENP7	Chr1	45988234	1:46145049:G:A	Chr1	46145049	G	A	0.212121	-0.047635	0.00671782
ENSBTAG00000013464	CEP97	Chr1	46077323	1:46117911:T:G	Chr1	46117911	T	G	0.140152	0.327718	0.000239439
ENSBTAG00000000088	ALCAM	Chr1	49930776	1:49860195:C:A	Chr1	49860195	C	A	0.104167	-0.262364	0.0057531
ENSBTAG00000003585	CD47	Chr1	52777176	1:52614946:C:T	Chr1	52614946	C	T	0.498106	0.139815	1.02508e-08
ENSBTAG00000005787	IFT57	Chr1	52953508	1:52878226:A:AAAT	Chr1	52878226	A	AAAT	0.392045	0.243024	0.00132783
ENSBTAG00000049108	TRAT1	Chr1	53578754	1:53997681:T:C	Chr1	53997681	T	C	0.176136	0.185891	0.0266354
ENSBTAG00000012646	PLCXD2	Chr1	56425479	1:56460024:T:A	Chr1	56460024	A	T	0.225379	-0.596225	5.03998e-09
ENSBTAG00000048550	GCSAM	Chr1	56944529	1:56876188:G:T	Chr1	56876188	G	T	0.0795455	0.39102	6.48522e-11
ENSBTAG00000033319	CD200	Chr1	57126576	1:57196431:AAT:A	Chr1	57196431	AAT	A	0.348485	0.394169	1.47467e-18
ENSBTAG00000009084	ATG3	Chr1	57343709	1:57245854:G:A	Chr1	57245854	G	A	0.424242	-3.18821e-07	4.61333e-24
ENSBTAG00000009085	SLC35A5	Chr1	57343854	1:57361377:C:T	Chr1	57361377	C	T	0.221591	-0.242424	2.27119e-10
ENSBTAG00000040144	NA	Chr1	57586854	1:57586215:T:G	Chr1	57586215	T	G	0.1875	-0.322989	3.45834e-07
ENSBTAG00000001235	CD200R1L	Chr1	57681112	1:57226637:G:T	Chr1	57226637	T	G	0.147727	0.153861	9.24759e-07
ENSBTAG00000013920	NA	Chr1	58113303	1:58133347:C:T	Chr1	58133347	T	C	0.174242	0.352083	2.33454e-05
ENSBTAG00000013937	SPICE1	Chr1	58199879	1:58163864:T:C	Chr1	58163864	T	C	0.0909091	0.33904	0.0004255
ENSBTAG00000013292	SIDT1	Chr1	58218880	1:57560951:A:G	Chr1	57560951	A	G	0.0359848	0.31192	0.0106796
ENSBTAG00000007784	NAA50	Chr1	58433748	1:58557094:T:A	Chr1	58557094	T	A	0.403409	0.111149	0.00343503
ENSBTAG00000002703	ATP6V1A	Chr1	58434457	1:58303759:TG:T	Chr1	58303759	TG	T	0.0265152	0.341294	1.92255e-08
ENSBTAG00000004971	GRAMD1C	Chr1	58518935	1:58506980:A:G	Chr1	58506980	A	G	0.0662879	-0.288303	6.80782e-06
ENSBTAG00000004974	ZDHHC23	Chr1	58619103	1:58495965:G:A	Chr1	58495965	G	A	0.0435606	-0.796531	7.91437e-05
ENSBTAG00000004975	CCDC191	Chr1	58735117	1:57869065:G:A	Chr1	57869065	G	A	0.242424	0.377544	0.019223
ENSBTAG00000011921	TIGIT	Chr1	58926908	1:58938227:T:C	Chr1	58938227	T	C	0.382576	0.131837	0.0114611
ENSBTAG00000011928	ZBTB20	Chr1	59030035	1:59132006:C:T	Chr1	59132006	C	T	0.49053	-0.194753	0.000605895
ENSBTAG00000001390	B4GALT4	Chr1	64049977	1:64144217:A:G	Chr1	64144217	G	A	0.212121	0.259731	0.00244738
ENSBTAG00000000210	ARHGAP31	Chr1	64083128	1:64410566:C:G	Chr1	64410566	G	C	0.236742	0.230745	2.88696e-06
ENSBTAG00000008562	POGLUT1	Chr1	64246627	1:64223764:T:G	Chr1	64223764	T	G	0.350379	0.253111	2.79702e-08
ENSBTAG00000009391	ADPRH	Chr1	64334746	1:64261070:A:G	Chr1	64261070	G	A	0.350379	0.19852	0.0169953
ENSBTAG00000002182	COX17	Chr1	64432940	1:64301550:G:C	Chr1	64301550	G	C	0.342803	0.159499	0.000459168
ENSBTAG00000001293	CFAP91	Chr1	64451182	1:64452884:T:C	Chr1	64452884	T	C	0.403409	0.416534	6.96726e-11
ENSBTAG00000048057	GSK3B	Chr1	64861271	1:64110903:A:T	Chr1	64110903	A	T	0.123106	0.203736	0.00301735
ENSBTAG00000033170	LRRC58	Chr1	65096582	1:65098482:AG:A	Chr1	65098482	A	AG	0.185606	-0.221589	6.02265e-12
ENSBTAG00000001009	HCLS1	Chr1	66145729	1:66106615:T:C	Chr1	66106615	T	C	0.329545	-0.138675	1.77731e-22
ENSBTAG00000008862	GOLGB1	Chr1	66215030	1:66152292:GA:G	Chr1	66152292	GA	G	0.0833333	0.210055	0.000700851
ENSBTAG00000013069	IQCB1	Chr1	66293959	1:66293907:T:G	Chr1	66293907	T	G	0.329545	-0.29644	3.10161e-12
ENSBTAG00000013070	EAF2	Chr1	66294137	1:66302692:TAC:T	Chr1	66302692	TAC	T	0.106061	-0.537047	8.00167e-20
ENSBTAG00000013118	CD86	Chr1	66543643	1:66266173:TA:T	Chr1	66266173	TA	T	0.142045	0.254398	3.38586e-10
ENSBTAG00000054326	WDR5B	Chr1	66866398	1:67433076:C:T	Chr1	67433076	C	T	0.441288	0.16341	0.00715795
ENSBTAG00000016656	PARP14	Chr1	67012288	1:67478345:T:TTGGGGG	Chr1	67478345	T	TTGGGGG	0.348485	0.19321	0.00483736
ENSBTAG00000005066	HSPBAP1	Chr1	67120252	1:67074346:T:TCAGA	Chr1	67074346	T	TCAGA	0.278409	0.283628	6.77057e-05
ENSBTAG00000005071	SLC49A4	Chr1	67121601	1:67431445:T:C	Chr1	67431445	C	T	0.234848	0.191326	0.00428198
ENSBTAG00000018877	PDIA5	Chr1	67411431	1:67464879:TAC:T	Chr1	67464879	TAC	T	0.0719697	-0.300893	6.51512e-08
ENSBTAG00000014797	SEC22A	Chr1	67555433	1:67686237:G:A	Chr1	67686237	G	A	0.0435606	0.716778	2.25911e-05
ENSBTAG00000023607	HACD2	Chr1	67952810	1:67839937:A:C	Chr1	67839937	A	C	0.121212	0.394267	0.00074398
ENSBTAG00000000566	CCDC14	Chr1	68332524	1:68433194:GA:G	Chr1	68433194	G	GA	0.287879	-0.339151	7.06185e-14
ENSBTAG00000013727	UMPS	Chr1	69127864	1:69207141:T:C	Chr1	69207141	T	C	0.363636	0.227476	2.5619e-09
ENSBTAG00000013755	ITGB5	Chr1	69312128	1:69267019:T:C	Chr1	69267019	C	T	0.361742	0.484361	2.68685e-13
ENSBTAG00000021396	HEG1	Chr1	69525187	1:70035936:GTGTGTGTGTA:G	Chr1	70035936	GTGTGTGTGTA	G	0.378788	-0.258534	0.000233438
ENSBTAG00000000496	SLC12A8	Chr1	69670381	1:69735075:C:T	Chr1	69735075	T	C	0.477273	0.240383	0.0149163
ENSBTAG00000011383	SNX4	Chr1	69946638	1:70851935:T:A	Chr1	70851935	T	A	0.369318	0.130243	0.000175316
ENSBTAG00000006471	OSBPL11	Chr1	70053523	1:69768966:G:GTT	Chr1	69768966	GTT	G	0.113636	0.412752	1.8888e-07
ENSBTAG00000014208	RPL35A	Chr1	70180132	1:70161663:G:A	Chr1	70161663	A	G	0.159091	-0.261193	2.65713e-15
ENSBTAG00000018025	IQCG	Chr1	70180445	1:70215735:AC:A	Chr1	70215735	A	AC	0.166667	0.371908	6.58487e-17
ENSBTAG00000054586	NA	Chr1	70257370	1:70311544:T:A	Chr1	70311544	T	A	0.462121	0.50011	4.13946e-10
ENSBTAG00000001890	RUBCN	Chr1	70372269	1:70379020:G:A	Chr1	70379020	G	A	0.496212	-0.263259	1.03271e-11
ENSBTAG00000014874	FYTTD1	Chr1	70373184	1:70434560:G:A	Chr1	70434560	G	A	0.164773	0.269694	1.28407e-07
ENSBTAG00000021364	TNK2	Chr1	70627585	1:69844932:AG:A	Chr1	69844932	AG	A	0.128788	0.153614	1.64574e-05
ENSBTAG00000016979	PCYT1A	Chr1	70878013	1:70957978:TA:T	Chr1	70957978	TA	T	0.132576	-0.408695	1.78518e-08
ENSBTAG00000032684	DYNLT2B	Chr1	70909767	1:70835466:C:T	Chr1	70835466	C	T	0.0719697	0.468919	8.9336e-07
ENSBTAG00000040161	NA	Chr1	70922405	1:70783490:G:C	Chr1	70783490	G	C	0.119318	-0.260907	0.0012004
ENSBTAG00000007577	UBXN7	Chr1	70987415	1:70524265:A:G	Chr1	70524265	A	G	0.119318	-0.302174	1.35511e-05
ENSBTAG00000013317	RNF168	Chr1	71048691	1:71050319:G:A	Chr1	71050319	G	A	0.265152	0.122194	0.00405538
ENSBTAG00000009614	NRROS	Chr1	71155753	1:71101694:T:TA	Chr1	71101694	T	TA	0.168561	-0.110486	0.00401147
ENSBTAG00000049165	NA	Chr1	71229012	1:71254504:G:A	Chr1	71254504	A	G	0.407197	0.293164	0.0156629
ENSBTAG00000048195	PIGX	Chr1	71232258	1:71566792:G:A	Chr1	71566792	A	G	0.477273	0.184378	0.00226661
ENSBTAG00000047856	PAK2	Chr1	71257815	1:71141122:C:T	Chr1	71141122	C	T	0.125	-2.79491e-07	3.45956e-16
ENSBTAG00000032674	SENP5	Chr1	71370901	1:72191978:A:T	Chr1	72191978	A	T	0.486742	-0.194364	0.00129395
ENSBTAG00000008873	NCBP2	Chr1	71410588	1:71410667:C:T	Chr1	71410667	C	T	0.174242	-0.195287	1.61683e-16
ENSBTAG00000048390	NCBP2AS2	Chr1	71410764	1:71781231:G:T	Chr1	71781231	T	G	0.484848	-0.268	0.012032
ENSBTAG00000000448	BDH1	Chr1	72000537	1:71982241:T:C	Chr1	71982241	C	T	0.405303	-0.283472	2.89494e-07
ENSBTAG00000006724	PPP1R2	Chr1	72100095	1:72867566:G:C	Chr1	72867566	G	C	0.439394	0.0801671	0.0103773
ENSBTAG00000054986	ACAP2	Chr1	72278288	1:72368862:G:GT	Chr1	72368862	GT	G	0.477273	0.166501	0.0113519
ENSBTAG00000014564	XXYLT1	Chr1	72326706	1:72139569:G:C	Chr1	72139569	C	G	0.195076	-0.327369	9.19717e-13
ENSBTAG00000008462	FAM43A	Chr1	72862834	1:72180411:GA:G	Chr1	72180411	G	GA	0.409091	0.140466	1.39204e-05
ENSBTAG00000008461	LSG1	Chr1	72877166	1:72832376:T:C	Chr1	72832376	C	T	0.431818	-0.211969	0.00388846
ENSBTAG00000013204	ATP13A3	Chr1	73048104	1:73140226:G:A	Chr1	73140226	G	A	0.0435606	-0.235125	0.0100225
ENSBTAG00000048497	NA	Chr1	73253997	1:72637772:G:A	Chr1	72637772	G	A	0.340909	0.204762	0.00529676
ENSBTAG00000006945	CCDC50	Chr1	76006093	1:76460059:A:T	Chr1	76460059	A	T	0.388258	0.243299	8.60681e-05
ENSBTAG00000018703	OSTN	Chr1	76102113	1:76095908:G:T	Chr1	76095908	T	G	0.392045	-0.300606	4.99462e-07
ENSBTAG00000013205	IL1RAP	Chr1	76723526	1:76732177:G:C	Chr1	76732177	C	G	0.49053	-0.0858504	2.03769e-13
ENSBTAG00000044001	LPP	Chr1	79136219	1:78748085:A:G	Chr1	78748085	G	A	0.276515	0.169052	0.000433923
ENSBTAG00000010357	ST6GAL1	Chr1	80267738	1:80132802:G:A	Chr1	80132802	G	A	0.0587121	-0.618248	7.31011e-07
ENSBTAG00000014727	RFC4	Chr1	80452886	1:80038220:A:G	Chr1	80038220	A	G	0.452652	-0.155548	0.00879332
ENSBTAG00000003151	DNAJB11	Chr1	80661936	1:80661774:C:G	Chr1	80661774	C	G	0.253788	0.173655	2.83018e-23
ENSBTAG00000003143	TBCCD1	Chr1	80666384	1:80665759:A:G	Chr1	80665759	A	G	0.299242	-0.576006	1.50074e-12
ENSBTAG00000014915	ETV5	Chr1	81135306	1:81104254:C:CT	Chr1	81104254	C	CT	0.486742	-0.523831	4.68468e-13
ENSBTAG00000001749	SENP2	Chr1	81621312	1:81586567:GA:G	Chr1	81586567	GA	G	0.285985	0.172093	3.69483e-10
ENSBTAG00000017103	MAP3K13	Chr1	81868201	1:81838517:C:CG	Chr1	81838517	CG	C	0.229167	-0.385256	9.97422e-09
ENSBTAG00000019625	EHHADH	Chr1	81877675	1:81867620:G:A	Chr1	81867620	A	G	0.164773	-0.353528	2.43798e-21
ENSBTAG00000005212	C1H3orf70	Chr1	81984065	1:81380627:G:A	Chr1	81380627	A	G	0.496212	0.307402	3.68797e-07
ENSBTAG00000005209	VPS8	Chr1	82377026	1:81669359:G:A	Chr1	81669359	A	G	0.248106	-0.156685	0.0130049
ENSBTAG00000019014	MAGEF1	Chr1	82499646	1:82500066:C:A	Chr1	82500066	C	A	0.38447	-0.148405	1.89906e-11
ENSBTAG00000019336	DVL3	Chr1	82996905	1:82913089:G:GT	Chr1	82913089	GT	G	0.424242	0.301299	5.33138e-07
ENSBTAG00000042699	SNORA63	Chr1	83640508	1:82764413:C:A	Chr1	82764413	C	A	0.0568182	-1.24361	0.0110179
ENSBTAG00000010394	MCF2L2	Chr1	83653155	1:83706173:A:C	Chr1	83706173	A	C	0.181818	0.232236	9.91568e-06
ENSBTAG00000010397	B3GNT5	Chr1	83827942	1:83865734:C:T	Chr1	83865734	T	C	0.0643939	-0.423512	1.05335e-15
ENSBTAG00000006552	LAMP3	Chr1	83922241	1:83937249:A:G	Chr1	83937249	A	G	0.242424	-0.263967	6.64115e-11
ENSBTAG00000006548	MCCC1	Chr1	83960687	1:83991723:A:G	Chr1	83991723	G	A	0.452652	-0.405339	5.24993e-11
ENSBTAG00000012797	DCUN1D1	Chr1	84042263	1:84035513:T:C	Chr1	84035513	T	C	0.492424	-0.122133	9.9572e-05
ENSBTAG00000000290	ATP11B	Chr1	84205584	1:83960211:T:G	Chr1	83960211	T	G	0.117424	-0.104462	2.47214e-09
ENSBTAG00000023513	DNAJC19	Chr1	86035468	1:86039233:G:A	Chr1	86039233	G	A	0.268939	-0.606877	1.73847e-10
ENSBTAG00000005946	USP13	Chr1	87482259	1:87042307:T:C	Chr1	87042307	T	C	0.215909	-0.167566	0.0110609
ENSBTAG00000002462	MRPL47	Chr1	87518535	1:87514444:T:TTCTC	Chr1	87514444	T	TTCTC	0.0568182	-0.313547	7.55672e-08
ENSBTAG00000002463	NDUFB5	Chr1	87518661	1:87578992:T:C	Chr1	87578992	C	T	0.439394	-0.117433	0.00952527
ENSBTAG00000002460	ACTL6A	Chr1	87567798	1:86853139:AT:A	Chr1	86853139	AT	A	0.335227	-0.0940468	0.0185965
ENSBTAG00000002767	GNB4	Chr1	87648348	1:87607690:T:C	Chr1	87607690	C	T	0.179924	0.0951544	8.05843e-05
ENSBTAG00000010485	MFN1	Chr1	87765315	1:87750762:T:C	Chr1	87750762	T	C	0.227273	-0.184122	0.000930063
ENSBTAG00000037393	ZNF639	Chr1	87785489	1:87436639:G:A	Chr1	87436639	G	A	0.221591	0.399498	6.31115e-10
ENSBTAG00000009235	KCNMB3	Chr1	87793360	1:87851631:G:A	Chr1	87851631	G	A	0.367424	-0.300769	8.41946e-07
ENSBTAG00000009232	PIK3CA	Chr1	87964195	1:88889314:C:T	Chr1	88889314	C	T	0.179924	-0.108213	0.00939446
ENSBTAG00000012463	ZMAT3	Chr1	88005931	1:88019505:A:C	Chr1	88019505	A	C	0.215909	0.467955	2.93882e-05
ENSBTAG00000018994	TNFSF10	Chr1	94985032	1:94968034:T:C	Chr1	94968034	T	C	0.482955	0.121627	0.0102725
ENSBTAG00000010874	GHSR	Chr1	95029122	1:94574708:G:A	Chr1	94574708	A	G	0.482955	0.258779	7.13797e-07
ENSBTAG00000017490	PLD1	Chr1	95742045	1:95748979:T:C	Chr1	95748979	C	T	0.138258	0.241002	2.47849e-05
ENSBTAG00000049814	NA	Chr1	96022259	1:96283569:T:A	Chr1	96283569	T	A	0.191288	-0.188785	0.00135479
ENSBTAG00000011742	TNIK	Chr1	96395574	1:95774023:T:C	Chr1	95774023	C	T	0.293561	0.12548	8.0117e-06
ENSBTAG00000007394	RPL22L1	Chr1	96572444	1:96724437:ATC:A	Chr1	96724437	A	ATC	0.295455	0.205926	7.65385e-07
ENSBTAG00000004154	SKIL	Chr1	97055587	1:97052816:C:CTT	Chr1	97052816	C	CTT	0.350379	-0.223687	1.87375e-08
ENSBTAG00000001403	PRKCI	Chr1	97163222	1:97195874:T:G	Chr1	97195874	T	G	0.335227	0.345299	2.27164e-25
ENSBTAG00000013938	PHC3	Chr1	97196215	1:96373952:A:T	Chr1	96373952	T	A	0.189394	0.100944	0.00930249
ENSBTAG00000048011	GPR160	Chr1	97282211	1:96427061:G:A	Chr1	96427061	G	A	0.223485	-0.152385	2.13419e-05
ENSBTAG00000013142	MYNN	Chr1	97604139	1:97551287:T:A	Chr1	97551287	A	T	0.382576	-0.0996204	0.0199021
ENSBTAG00000013141	ACTRT3	Chr1	97604627	1:97551287:T:A	Chr1	97551287	A	T	0.382576	-0.300078	3.52839e-05
ENSBTAG00000018727	GOLIM4	Chr1	99361284	1:99400281:C:T	Chr1	99400281	C	T	0.126894	-0.238213	0.0269087
ENSBTAG00000012708	SERPINI1	Chr1	99743550	1:100076844:G:C	Chr1	100076844	G	C	0.0606061	0.366872	0.00228523
ENSBTAG00000016228	NMD3	Chr1	106186579	1:106186562:T:C	Chr1	106186562	T	C	0.267045	0.0615735	7.75336e-05
ENSBTAG00000052570	NA	Chr1	107385861	1:107397291:G:A	Chr1	107397291	G	A	0.238636	-0.0317075	2.32808e-05
ENSBTAG00000009336	LXN	Chr1	108867032	1:108866976:T:C	Chr1	108866976	T	C	0.316288	0.587082	1.24151e-30
ENSBTAG00000027795	GFM1	Chr1	108903175	1:108939558:A:G	Chr1	108939558	A	G	0.160985	0.310835	1.46501e-06
ENSBTAG00000009012	PTX3	Chr1	110164262	1:110263935:T:G	Chr1	110263935	T	G	0.0965909	0.326442	2.98737e-09
ENSBTAG00000003851	CCNL1	Chr1	110447555	1:110404300:C:T	Chr1	110404300	C	T	0.469697	-0.122565	2.56899e-05
ENSBTAG00000018009	NA	Chr1	110642235	1:110699288:C:T	Chr1	110699288	C	T	0.10076	-0.507346	1.78358e-14
ENSBTAG00000018471	SSR3	Chr1	111095639	1:111902740:G:T	Chr1	111902740	T	G	0.448864	-0.121404	0.00118926
ENSBTAG00000013013	GMPS	Chr1	111804777	1:111723419:A:G	Chr1	111723419	G	A	0.399621	0.168139	7.72672e-05
ENSBTAG00000014318	SLC33A1	Chr1	111829275	1:111942149:G:GA	Chr1	111942149	G	GA	0.0625	0.272403	0.000154052
ENSBTAG00000005203	C1H3orf33	Chr1	111876351	1:111936330:T:C	Chr1	111936330	T	C	0.0606061	-0.814914	2.35067e-06
ENSBTAG00000002075	MME	Chr1	112595507	1:112705512:C:CT	Chr1	112705512	C	CT	0.380682	-0.294587	2.62179e-09
ENSBTAG00000006142	DHX36	Chr1	113326570	1:113388071:G:A	Chr1	113388071	A	G	0.412879	0.132645	0.000652322
ENSBTAG00000048392	NA	Chr1	114498974	1:114484562:G:T	Chr1	114484562	G	T	0.0700758	-0.571446	3.89375e-14
ENSBTAG00000055257	RAP2B	Chr1	114558377	1:114610284:T:A	Chr1	114610284	T	A	0.0814394	-0.469229	1.0666e-26
ENSBTAG00000001465	P2RY1	Chr1	114910097	1:114941357:TA:T	Chr1	114941357	T	TA	0.450758	0.254476	1.26159e-14
ENSBTAG00000004564	MBNL1	Chr1	115524968	1:115457670:T:C	Chr1	115457670	T	C	0.393939	-0.146858	0.00109023
ENSBTAG00000011192	GPR87	Chr1	116756156	1:116576180:G:T	Chr1	116576180	G	T	0.435606	0.118079	0.016095
ENSBTAG00000009848	GPR171	Chr1	116891761	1:116844245:T:A	Chr1	116844245	T	A	0.202652	-0.137275	4.94372e-05
ENSBTAG00000021703	MED12L	Chr1	117017533	1:116793561:T:C	Chr1	116793561	C	T	0.496212	0.149202	0.000214181
ENSBTAG00000023445	SIAH2	Chr1	117361865	1:116509537:G:A	Chr1	116509537	G	A	0.270833	0.219846	0.00324058
ENSBTAG00000031435	SELENOT	Chr1	117537602	1:117513647:A:G	Chr1	117513647	A	G	0.268939	0.246238	4.40397e-29
ENSBTAG00000009104	SERP1	Chr1	117598269	1:117623971:T:C	Chr1	117623971	T	C	0.454545	-0.114053	0.00138836
ENSBTAG00000018402	TSC22D2	Chr1	117718237	1:117698604:G:A	Chr1	117698604	G	A	0.344697	0.204605	0.000232899
ENSBTAG00000011147	RNF13	Chr1	118350034	1:118350208:G:C	Chr1	118350208	G	C	0.0909091	0.27686	4.37803e-06
ENSBTAG00000002395	HPS3	Chr1	119046161	1:118486714:CG:C	Chr1	118486714	CG	C	0.418561	0.133442	1.76541e-05
ENSBTAG00000019704	HLTF	Chr1	119074042	1:119061140:G:A	Chr1	119061140	G	A	0.369318	-0.164249	1.14157e-16
ENSBTAG00000001721	GYG1	Chr1	119191206	1:119181999:A:G	Chr1	119181999	A	G	0.314394	0.260524	2.48943e-07
ENSBTAG00000022227	PLSCR2	Chr1	121946373	1:121946574:G:GTAGA	Chr1	121946574	G	GTAGA	0.172348	-0.226104	7.47262e-18
ENSBTAG00000054268	NA	Chr1	122019016	1:122295970:C:G	Chr1	122295970	C	G	0.299242	-0.48685	4.93179e-05
ENSBTAG00000007331	PLOD2	Chr1	122349985	1:122376210:C:T	Chr1	122376210	C	T	0.426136	0.483504	3.20873e-21
ENSBTAG00000007933	DIPK2A	Chr1	124888751	1:124870034:G:A	Chr1	124870034	G	A	0.198864	-0.0976701	8.35701e-07
ENSBTAG00000031178	SLC9A9	Chr1	125042864	1:125042759:TA:T	Chr1	125042759	T	TA	0.265152	-0.154862	0.0053591
ENSBTAG00000011584	CHST2	Chr1	125874332	1:125663118:C:T	Chr1	125663118	C	T	0.0265152	0.460544	0.000172779
ENSBTAG00000002232	TRPC1	Chr1	126320424	1:126320901:G:C	Chr1	126320901	G	C	0.357955	-0.317155	1.36751e-09
ENSBTAG00000011529	ATR	Chr1	126471506	1:126471910:G:T	Chr1	126471910	G	T	0.166667	-0.140747	1.55232e-05
ENSBTAG00000011524	XRN1	Chr1	126593244	1:126678957:G:A	Chr1	126678957	A	G	0.327652	-0.0801365	3.21291e-05
ENSBTAG00000018138	GK5	Chr1	126736160	1:126898826:A:G	Chr1	126898826	G	A	0.479167	0.22813	1.73672e-05
ENSBTAG00000006222	TFDP2	Chr1	126884718	1:126898826:A:G	Chr1	126898826	G	A	0.479167	0.411902	8.46715e-32
ENSBTAG00000014140	ATP1B3	Chr1	127086255	1:126151446:C:T	Chr1	126151446	C	T	0.295455	0.119107	4.9825e-06
ENSBTAG00000040061	ZBTB38	Chr1	127574835	1:126892085:A:AT	Chr1	126892085	A	AT	0.352273	-0.076781	0.0213295
ENSBTAG00000051936	NA	Chr1	129414273	1:128947665:T:C	Chr1	128947665	T	C	0.17803	-0.211883	0.00315155
ENSBTAG00000014843	COPB2	Chr1	129706888	1:129786758:C:CA	Chr1	129786758	C	CA	0.308712	-0.291227	4.57371e-15
ENSBTAG00000023426	FAIM	Chr1	130505304	1:130500841:C:A	Chr1	130500841	C	A	0.289773	0.165534	0.00269625
ENSBTAG00000018538	CEP70	Chr1	130531396	1:130641059:G:A	Chr1	130641059	G	A	0.293561	0.201438	1.23879e-12
ENSBTAG00000008111	ESYT3	Chr1	130664345	1:130661173:T:C	Chr1	130661173	T	C	0.227273	0.33372	6.09326e-09
ENSBTAG00000001497	MRAS	Chr1	130773432	1:130737421:C:G	Chr1	130737421	C	G	0.166667	0.527707	6.05038e-19
ENSBTAG00000008299	IL20RB	Chr1	132207262	1:132137468:C:T	Chr1	132137468	C	T	0.0227273	0.931657	2.21623e-07
ENSBTAG00000015221	PCCB	Chr1	133024359	1:133041558:C:CG	Chr1	133041558	C	CG	0.17803	-0.317471	0.014163
ENSBTAG00000023416	PPP2R3A	Chr1	133350011	1:133287498:A:G	Chr1	133287498	G	A	0.323864	-0.334083	3.59736e-27
ENSBTAG00000014461	ANAPC13	Chr1	134839357	1:134845701:G:C	Chr1	134845701	C	G	0.354167	-0.30423	5.37788e-06
ENSBTAG00000016999	RYK	Chr1	135082835	1:135132281:T:C	Chr1	135132281	T	C	0.19697	-0.623207	1.23078e-05
ENSBTAG00000044075	SRPRB	Chr1	135573130	1:135526122:T:C	Chr1	135526122	T	C	0.388258	-0.267287	3.55946e-13
ENSBTAG00000000526	TOPBP1	Chr1	135753515	1:136583330:G:A	Chr1	136583330	G	A	0.272727	-0.0980942	0.0135021
ENSBTAG00000035556	CDV3	Chr1	135881717	1:135891569:G:A	Chr1	135891569	A	G	0.285985	0.18933	6.14553e-10
ENSBTAG00000017659	BFSP2	Chr1	136027624	1:135953804:G:A	Chr1	135953804	G	A	0.111742	0.810764	3.19076e-10
ENSBTAG00000005769	NPHP3	Chr1	136814838	1:136786681:A:G	Chr1	136786681	A	G	0.0984849	0.189356	3.59155e-05
ENSBTAG00000004495	UBA5	Chr1	136905496	1:136903090:G:A	Chr1	136903090	G	A	0.227273	-0.204	1.06877e-18
ENSBTAG00000031010	ACAD11	Chr1	136905777	1:136871647:CACTG:C	Chr1	136871647	CACTG	C	0.172348	-0.511394	1.13407e-21
ENSBTAG00000002966	DNAJC13	Chr1	137215251	1:137111251:C:A	Chr1	137111251	A	C	0.155303	-0.279692	4.55799e-07
ENSBTAG00000054913	NA	Chr1	137814905	1:137768776:AT:A	Chr1	137768776	AT	A	0.272727	0.6579	3.25146e-05
ENSBTAG00000030942	MRPL3	Chr1	138384450	1:138394572:A:G	Chr1	138394572	A	G	0.176136	-0.23141	9.17668e-11
ENSBTAG00000018749	NUDT16	Chr1	138550417	1:137737229:T:C	Chr1	137737229	C	T	0.467803	-0.402178	2.34258e-13
ENSBTAG00000009258	NEK11	Chr1	138835292	1:138697727:G:A	Chr1	138697727	G	A	0.223485	-0.41031	2.62878e-05
ENSBTAG00000007462	ASTE1	Chr1	138839427	1:138191514:A:T	Chr1	138191514	A	T	0.477273	0.257181	0.000165492
ENSBTAG00000011626	ATP2C1	Chr1	139026120	1:139084488:C:G	Chr1	139084488	G	C	0.429924	0.0906357	0.000635761
ENSBTAG00000013600	PSMG1	Chr1	139238322	1:138647054:A:G	Chr1	138647054	G	A	0.378788	-0.168746	6.35163e-12
ENSBTAG00000018768	HMGN1	Chr1	139412414	1:139436628:T:C	Chr1	139436628	T	C	0.151515	-0.401063	1.40306e-15
ENSBTAG00000023106	NA	Chr1	139432042	1:139459502:T:G	Chr1	139459502	T	G	0.130682	-0.5955	1.81129e-14
ENSBTAG00000013629	GET1	Chr1	139443101	1:139470493:C:G	Chr1	139470493	G	C	0.405303	-0.282961	4.39198e-08
ENSBTAG00000030921	FAM3B	Chr1	141551209	1:141486275:C:T	Chr1	141486275	T	C	0.221591	0.851563	3.75699e-09
ENSBTAG00000008471	MX2	Chr1	141621166	1:141624354:GGT:G	Chr1	141624354	GGT	G	0.297348	0.298132	4.55796e-09
ENSBTAG00000030913	MX1	Chr1	141677688	1:141686405:C:T	Chr1	141686405	C	T	0.331439	0.390941	4.1263e-10
ENSBTAG00000021253	PRDM15	Chr1	142132485	1:142104802:G:A	Chr1	142104802	G	A	0.145833	0.401199	2.70151e-05
ENSBTAG00000030814	TFF2	Chr1	142618268	1:143582344:C:A	Chr1	143582344	C	A	0.111742	0.216531	6.72581e-07
ENSBTAG00000021280	TMPRSS3	Chr1	142680495	1:142929220:G:A	Chr1	142929220	G	A	0.113636	0.726408	2.96906e-07
ENSBTAG00000021286	SLC37A1	Chr1	142814828	1:142800404:G:A	Chr1	142800404	G	A	0.11553	-0.247417	2.40566e-07
ENSBTAG00000021490	WDR4	Chr1	143108077	1:143221260:A:G	Chr1	143221260	G	A	0.439394	-0.283124	0.00370409
ENSBTAG00000021491	NDUFV3	Chr1	143119851	1:143116689:A:G	Chr1	143116689	G	A	0.166667	0.188945	5.25841e-05
ENSBTAG00000011645	U2AF1	Chr1	143274941	1:143258447:G:A	Chr1	143258447	G	A	0.488636	0.155341	3.64766e-07
ENSBTAG00000017407	HSF2BP	Chr1	143729051	1:143721718:G:T	Chr1	143721718	G	T	0.181818	-0.462932	9.23304e-12
ENSBTAG00000017418	RRP1B	Chr1	143729216	1:143721718:G:T	Chr1	143721718	G	T	0.181818	-0.172047	4.91113e-15
ENSBTAG00000018186	PDXK	Chr1	143782381	1:143818669:C:CCTT	Chr1	143818669	C	CCTT	0.465909	0.179617	4.18328e-06
ENSBTAG00000000524	CSTB	Chr1	143850428	1:143652957:CA:C	Chr1	143652957	CA	C	0.306818	0.259367	7.20924e-13
ENSBTAG00000020456	AGPAT3	Chr1	143941827	1:143938425:T:C	Chr1	143938425	C	T	0.306818	0.153278	3.54364e-09
ENSBTAG00000007100	TRAPPC10	Chr1	144056127	1:144034849:T:TC	Chr1	144034849	T	TC	0.0909091	0.157864	6.96804e-24
ENSBTAG00000007105	NA	Chr1	144134114	1:144195706:G:A	Chr1	144195706	G	A	0.481061	-0.15371	0.0204815
ENSBTAG00000007106	NA	Chr1	144148920	1:144149325:C:T	Chr1	144149325	C	T	0.206439	-0.23091	2.87901e-11
ENSBTAG00000014880	NA	Chr1	144234833	1:144158448:C:T	Chr1	144158448	C	T	0.270833	-0.319623	1.95756e-07
ENSBTAG00000010658	PFKL	Chr1	144308712	1:143347416:C:T	Chr1	143347416	C	T	0.232955	-0.150694	0.0234986
ENSBTAG00000019589	CFAP410	Chr1	144352212	1:144295001:CCCGTGCGCCCCTCCGAG:C	Chr1	144295001	CCCGTGCGCCCCTCCGAG	C	0.0625	-0.618652	0.00585253
ENSBTAG00000021901	TRPM2	Chr1	144361188	1:144952011:G:C	Chr1	144952011	G	C	0.126894	0.133648	2.25254e-05
ENSBTAG00000048090	UBE2G2	Chr1	144684327	1:144746624:TAG:T	Chr1	144746624	TAG	T	0.333333	0.197385	8.69749e-07
ENSBTAG00000017321	SUMO3	Chr1	144696665	1:144714041:A:G	Chr1	144714041	G	A	0.479167	0.139101	0.0234453
ENSBTAG00000021771	PTTG1IP	Chr1	144730575	1:144709698:T:TG	Chr1	144709698	TG	T	0.452652	0.136842	2.26861e-05
ENSBTAG00000017060	ITGB2	Chr1	144789479	1:144816818:G:A	Chr1	144816818	G	A	0.13447	-0.15387	5.92558e-06
ENSBTAG00000017010	SLX9	Chr1	144809575	1:144828292:T:C	Chr1	144828292	T	C	0.443182	0.393504	1.57095e-10
ENSBTAG00000017486	ADARB1	Chr1	144937739	1:144964456:C:T	Chr1	144964456	C	T	0.107955	7.57452e-07	2.92398e-08
ENSBTAG00000007818	POFUT2	Chr1	145103157	1:145091860:GATTC:G	Chr1	145091860	G	GATTC	0.172348	-0.16056	2.77151e-05
ENSBTAG00000023907	COL18A1	Chr1	145202139	1:144678419:A:G	Chr1	144678419	A	G	0.376894	0.121998	0.0187756
ENSBTAG00000024162	SLC19A1	Chr1	145325287	1:144934453:C:A	Chr1	144934453	C	A	0.238636	0.210948	4.63982e-06
ENSBTAG00000030775	PCBP3	Chr1	145395831	1:145583404:C:G	Chr1	145583404	C	G	0.140152	0.280872	1.06017e-06
ENSBTAG00000003148	MCM3AP	Chr1	145971979	1:145891342:T:C	Chr1	145891342	T	C	0.126894	-0.157311	3.49574e-10
ENSBTAG00000003161	YBEY	Chr1	145972841	1:146238844:A:G	Chr1	146238844	A	G	0.30303	0.435488	4.19475e-15
ENSBTAG00000030670	PCNT	Chr1	146001887	1:146751799:A:AT	Chr1	146751799	A	AT	0.333333	-0.112877	0.00137162
ENSBTAG00000004777	S100B	Chr1	146280008	1:146275037:GTGGTACCTATA:G	Chr1	146275037	GTGGTACCTATA	G	0.0719697	0.959128	1.83118e-15
ENSBTAG00000005503	PRMT2	Chr1	146320300	1:145707323:C:T	Chr1	145707323	C	T	0.356061	-0.29231	2.28734e-10
ENSBTAG00000044270	bta-mir-2285a	Chr1	147203840	1:147785387:A:G	Chr1	147785387	A	G	0.412879	-0.169563	0.00896034
ENSBTAG00000004742	RUNX1	Chr1	147244722	1:148200349:T:TAA	Chr1	148200349	T	TAA	0.199187	-0.142483	0.00788531
ENSBTAG00000018682	SETD4	Chr1	148341194	1:148245498:G:C	Chr1	148245498	C	G	0.382576	-0.457055	1.15594e-05
ENSBTAG00000023384	CBR1	Chr1	148346841	1:148485928:G:A	Chr1	148485928	A	G	0.181818	-0.442418	0.00250271
ENSBTAG00000018688	CBR3	Chr1	148440559	1:148461119:A:G	Chr1	148461119	A	G	0.174242	-0.295854	2.52902e-05
ENSBTAG00000053201	NA	Chr1	148460222	1:148461119:A:G	Chr1	148461119	A	G	0.174242	-0.579598	2.29695e-23
ENSBTAG00000014306	DOP1B	Chr1	148516598	1:148464838:T:G	Chr1	148464838	T	G	0.174242	-0.394496	8.87498e-30
ENSBTAG00000011876	MORC3	Chr1	148604901	1:148605137:CGCGGCGGCG:C	Chr1	148605137	CGCGGCGGCG	C	0.231061	0.135424	5.84775e-06
ENSBTAG00000011880	CHAF1B	Chr1	148657614	1:149073752:G:A	Chr1	149073752	G	A	0.227273	0.243295	0.0153718
ENSBTAG00000033679	HLCS	Chr1	149199816	1:149440769:C:T	Chr1	149440769	C	T	0.359848	0.230635	0.00301502
ENSBTAG00000055107	PIGP	Chr1	149317939	1:149083167:A:G	Chr1	149083167	A	G	0.123106	0.589781	1.05986e-07
ENSBTAG00000008167	TTC3	Chr1	149318019	1:149281613:T:C	Chr1	149281613	T	C	0.373106	0.123159	0.000379414
ENSBTAG00000004791	VPS26C	Chr1	149496009	1:149023436:G:A	Chr1	149023436	A	G	0.429924	-0.10141	0.00294936
ENSBTAG00000001771	DYRK1A	Chr1	149567811	1:149729536:C:T	Chr1	149729536	C	T	0.157197	-0.139014	0.00589795
ENSBTAG00000011001	ERG	Chr1	150803833	1:150799216:A:G	Chr1	150799216	G	A	0.287879	-0.299481	8.2142e-06
ENSBTAG00000009214	ETS2	Chr1	151161815	1:151287620:GGGA:G	Chr1	151287620	GGGA	G	0.0227273	0.713522	1.12244e-14
ENSBTAG00000020787	PIK3R4	Chr1	151476119	1:151601932:T:C	Chr1	151601932	C	T	0.420455	0.189617	0.00638014
ENSBTAG00000006479	CAPN7	Chr1	152232656	1:152262114:CT:C	Chr1	152262114	CT	C	0.13447	-0.207007	2.60571e-09
ENSBTAG00000023377	SH3BP5	Chr1	152366452	1:151506373:C:G	Chr1	151506373	C	G	0.32197	0.198674	0.000709826
ENSBTAG00000019202	EAF1	Chr1	152450842	1:152492948:C:T	Chr1	152492948	C	T	0.0456274	-0.7022	8.03887e-14
ENSBTAG00000023375	METTL6	Chr1	152450925	1:152443672:A:G	Chr1	152443672	A	G	0.0435606	0.52383	1.56024e-09
ENSBTAG00000003718	HACL1	Chr1	152638556	1:152899923:A:C	Chr1	152899923	A	C	0.0643939	0.707124	2.2046e-10
ENSBTAG00000024815	ANKRD28	Chr1	152833098	1:152508079:T:C	Chr1	152508079	C	T	0.304924	-0.252988	0.00365492
ENSBTAG00000003916	DPH3	Chr1	153266600	1:153252513:G:A	Chr1	153252513	A	G	0.393939	0.281629	1.91025e-08
ENSBTAG00000030593	NA	Chr1	153514351	1:153616544:C:CT	Chr1	153616544	CT	C	0.0359849	-0.457611	9.01466e-07
ENSBTAG00000052583	NA	Chr1	153834040	1:153616544:C:CT	Chr1	153616544	CT	C	0.0359849	0.493487	0.000987305
ENSBTAG00000030581	TBC1D5	Chr1	154616588	1:154652471:T:G	Chr1	154652471	T	G	0.168561	0.183088	2.91974e-22
ENSBTAG00000021158	SATB1	Chr1	155525165	1:155510274:A:AT	Chr1	155510274	A	AT	0.236742	1.44718e-07	5.6526e-06
ENSBTAG00000013806	EFHB	Chr1	157190548	1:156954566:C:A	Chr1	156954566	C	A	0.263258	-0.286449	0.000306544
ENSBTAG00000046385	RAB5A	Chr1	157198502	1:157363281:C:A	Chr1	157363281	C	A	0.0378788	-0.681452	9.87208e-05
ENSBTAG00000000746	KAT2B	Chr1	157277142	1:157253652:A:G	Chr1	157253652	G	A	0.407787	0.131254	4.95772e-08
ENSBTAG00000049158	ZNF596	Chr1	157500089	1:157505001:C:T	Chr1	157505001	T	C	0.388258	-0.171702	1.13543e-06
ENSBTAG00000013916	HERC2	Chr2	951758	2:1177184:A:G	Chr2	1177184	G	A	0.030303	-0.144143	7.29787e-05
ENSBTAG00000016895	NIPA2	Chr2	1044599	2:1044798:C:G	Chr2	1044798	G	C	0.142045	-0.269134	3.20645e-13
ENSBTAG00000014714	TUBGCP5	Chr2	1284056	2:1658910:A:AAC	Chr2	1658910	AAC	A	0.316288	0.114402	0.00017506
ENSBTAG00000015841	CCDC115	Chr2	1318235	2:1653043:T:C	Chr2	1653043	T	C	0.0795455	0.259358	1.83989e-06
ENSBTAG00000003225	IMP4	Chr2	1318421	2:763971:C:T	Chr2	763971	C	T	0.333333	-0.336934	1.5182e-07
ENSBTAG00000011658	PTPN18	Chr2	1322994	2:1656392:TG:T	Chr2	1656392	TG	T	0.232955	-0.119019	9.48142e-06
ENSBTAG00000034978	FAM168B	Chr2	1906516	2:1895065:CT:C	Chr2	1895065	CT	C	0.418561	0.285377	1.38947e-06
ENSBTAG00000000941	PLEKHB2	Chr2	1920240	2:1996375:G:A	Chr2	1996375	A	G	0.308712	-0.223961	7.28841e-07
ENSBTAG00000050824	HS6ST1	Chr2	4187289	2:4016222:G:A	Chr2	4016222	A	G	0.320076	-0.150126	2.80118e-12
ENSBTAG00000005444	UGGT1	Chr2	4399011	2:3872046:G:A	Chr2	3872046	G	A	0.143939	0.391747	2.16992e-14
ENSBTAG00000006262	LIMS2	Chr2	4842240	2:4864277:A:G	Chr2	4864277	A	G	0.227273	-0.297084	6.98693e-14
ENSBTAG00000021172	IWS1	Chr2	5031103	2:5191930:G:T	Chr2	5191930	G	T	0.0833333	-0.319763	3.12515e-05
ENSBTAG00000004216	MAP3K2	Chr2	5199358	2:5233076:A:G	Chr2	5233076	A	G	0.410985	0.126579	0.00376459
ENSBTAG00000020777	ERCC3	Chr2	5248749	2:5234217:CT:C	Chr2	5234217	CT	C	0.189394	-0.607415	4.28378e-22
ENSBTAG00000019177	BIN1	Chr2	5418421	2:5419557:G:GC	Chr2	5419557	GC	G	0.473485	-0.160395	0.000123773
ENSBTAG00000000266	NAB1	Chr2	5683747	2:4858144:GT:G	Chr2	4858144	GT	G	0.13447	-0.1897	0.000165554
ENSBTAG00000015678	NEMP2	Chr2	5786099	2:5787396:CATTA:C	Chr2	5787396	CATTA	C	0.484848	-0.425099	1.73779e-17
ENSBTAG00000007719	MFSD6	Chr2	5881926	2:5926714:T:C	Chr2	5926714	T	C	0.340909	-0.197922	7.39109e-05
ENSBTAG00000007584	INPP1	Chr2	5970809	2:5960895:C:T	Chr2	5960895	T	C	0.482955	-0.264424	0.00015304
ENSBTAG00000007787	HIBCH	Chr2	5980698	2:6035413:T:TG	Chr2	6035413	T	TG	0.261364	0.553895	2.11437e-21
ENSBTAG00000018795	PMS1	Chr2	6592355	2:6727422:C:T	Chr2	6727422	C	T	0.320076	0.157574	0.0220548
ENSBTAG00000012557	OSGEPL1	Chr2	6592660	2:6592755:A:G	Chr2	6592755	A	G	0.147727	0.319234	1.26388e-09
ENSBTAG00000000492	ASNSD1	Chr2	6676526	2:6674128:C:T	Chr2	6674128	T	C	0.219697	-0.208188	3.3535e-08
ENSBTAG00000010498	SLC40A1	Chr2	6776417	2:6268676:A:AT	Chr2	6268676	A	AT	0.325758	-0.169899	9.87499e-06
ENSBTAG00000003002	WDR75	Chr2	6976756	2:6989934:T:TG	Chr2	6989934	TG	T	0.380682	-0.23971	8.00226e-09
ENSBTAG00000019929	ITGAV	Chr2	9749556	2:10395517:T:G	Chr2	10395517	T	G	0.0284091	-0.53025	0.000302965
ENSBTAG00000020961	DUSP19	Chr2	13490743	2:12710855:T:C	Chr2	12710855	C	T	0.452652	0.201849	1.55776e-05
ENSBTAG00000010977	FRZB	Chr2	13693339	2:13666244:C:T	Chr2	13666244	C	T	0.162879	0.613218	5.0829e-27
ENSBTAG00000008390	DNAJC10	Chr2	13842369	2:13838563:G:A	Chr2	13838563	A	G	0.477273	0.229726	1.67861e-08
ENSBTAG00000009256	ITGA4	Chr2	15176065	2:15098520:G:A	Chr2	15098520	A	G	0.202652	0.291646	3.13563e-07
ENSBTAG00000050811	NA	Chr2	15365274	2:15124512:T:C	Chr2	15124512	T	C	0.357955	-0.166464	0.0239361
ENSBTAG00000043956	UBE2E3	Chr2	15731672	2:15721264:C:T	Chr2	15721264	T	C	0.280303	-0.245483	1.38576e-06
ENSBTAG00000001861	SESTD1	Chr2	17618998	2:17611726:G:A	Chr2	17611726	G	A	0.0852273	-0.566347	3.16596e-10
ENSBTAG00000054051	NA	Chr2	18140241	2:18139418:G:A	Chr2	18139418	G	A	0.176136	0.651782	8.71813e-10
ENSBTAG00000052033	NA	Chr2	18146854	2:18139418:G:A	Chr2	18139418	G	A	0.176136	0.717291	2.87383e-10
ENSBTAG00000053974	NA	Chr2	18150863	2:18139418:G:A	Chr2	18139418	G	A	0.176136	0.660495	6.02563e-11
ENSBTAG00000052709	NA	Chr2	18333415	2:17469069:A:C	Chr2	17469069	A	C	0.0795455	1.03108	4.05645e-05
ENSBTAG00000001097	FKBP7	Chr2	18418696	2:17691865:C:A	Chr2	17691865	C	A	0.166667	-0.490297	3.37989e-05
ENSBTAG00000001096	PRKRA	Chr2	18437896	2:17875065:C:T	Chr2	17875065	C	T	0.49053	0.182046	0.00358257
ENSBTAG00000014405	OSBPL6	Chr2	18696841	2:18546332:AC:A	Chr2	18546332	AC	A	0.268939	-0.175727	2.27075e-18
ENSBTAG00000016396	PDE11A	Chr2	18826606	2:19174408:C:CCCT	Chr2	19174408	C	CCCT	0.0378788	1.18749	3.02584e-11
ENSBTAG00000009897	AGPS	Chr2	19468765	2:19407697:A:C	Chr2	19407697	A	C	0.223485	-0.160503	5.07518e-20
ENSBTAG00000019255	NFE2L2	Chr2	19617027	2:19617648:G:C	Chr2	19617648	G	C	0.223282	-0.130246	1.49453e-16
ENSBTAG00000021580	HNRNPA3	Chr2	19663581	2:19735377:A:T	Chr2	19735377	A	T	0.143939	-0.243629	0.0113054
ENSBTAG00000006693	MTX2	Chr2	20644147	2:20583409:G:A	Chr2	20583409	G	A	0.0871212	0.272928	0.0128226
ENSBTAG00000002295	ATF2	Chr2	21736326	2:21810846:A:G	Chr2	21810846	A	G	0.488636	0.289012	1.39028e-09
ENSBTAG00000053120	NA	Chr2	21776907	2:21660849:T:C	Chr2	21660849	T	C	0.467803	-0.287891	5.24536e-05
ENSBTAG00000008028	CHN1	Chr2	21843102	2:21987150:C:CT	Chr2	21987150	C	CT	0.0492424	0.925237	1.68984e-09
ENSBTAG00000001585	WIPF1	Chr2	22130034	2:22256458:CTT:C	Chr2	22256458	C	CTT	0.443182	0.178574	2.13833e-12
ENSBTAG00000021636	GPR155	Chr2	22319665	2:22483769:G:A	Chr2	22483769	G	A	0.206439	0.424074	6.92891e-09
ENSBTAG00000038620	CIR1	Chr2	22397396	2:22414994:A:T	Chr2	22414994	A	T	0.356061	0.390148	2.64318e-08
ENSBTAG00000012966	SCRN3	Chr2	22397420	2:22398223:C:A	Chr2	22398223	A	C	0.350379	6.66736e-07	4.23233e-30
ENSBTAG00000006970	OLA1	Chr2	22528225	2:22584113:C:T	Chr2	22584113	C	T	0.0568182	0.58979	2.04601e-07
ENSBTAG00000000176	SP3	Chr2	22797328	2:22696851:A:C	Chr2	22696851	A	C	0.242424	-0.190456	1.07306e-12
ENSBTAG00000003458	CDCA7	Chr2	23353696	2:23337063:G:T	Chr2	23337063	G	T	0.268939	-0.196131	1.17999e-08
ENSBTAG00000016836	PDK1	Chr2	24069014	2:24268553:T:C	Chr2	24268553	C	T	0.0227273	0.238307	0.00622584
ENSBTAG00000017266	ITGA6	Chr2	24179151	2:24377061:G:A	Chr2	24377061	G	A	0.248106	-0.142989	8.901e-14
ENSBTAG00000019075	METAP1D	Chr2	24547937	2:24474008:GA:G	Chr2	24474008	G	GA	0.276515	-0.323396	2.4348e-08
ENSBTAG00000010118	HAT1	Chr2	24604728	2:24604503:A:G	Chr2	24604503	A	G	0.143939	0.155631	0.000122877
ENSBTAG00000007898	CYBRD1	Chr2	24945933	2:25718484:A:G	Chr2	25718484	G	A	0.479167	-0.283993	3.67829e-05
ENSBTAG00000007683	DCAF17	Chr2	25029169	2:25002272:C:T	Chr2	25002272	C	T	0.225379	-0.191429	3.36114e-06
ENSBTAG00000016430	METTL8	Chr2	25029283	2:25041850:A:C	Chr2	25041850	A	C	0.431818	0.490431	4.78231e-16
ENSBTAG00000006918	TLK1	Chr2	25392972	2:25050391:A:G	Chr2	25050391	A	G	0.431818	0.147998	4.42444e-06
ENSBTAG00000020296	UBR3	Chr2	26517652	2:25930525:G:C	Chr2	25930525	G	C	0.0549242	0.171886	1.44105e-06
ENSBTAG00000026008	METTL5	Chr2	26534430	2:27049056:G:A	Chr2	27049056	G	A	0.257576	-0.225012	0.00645058
ENSBTAG00000008716	SSB	Chr2	26554248	2:26445157:G:C	Chr2	26445157	C	G	0.356061	-0.0862812	0.00254091
ENSBTAG00000001092	PHOSPHO2	Chr2	26618722	2:26677928:G:A	Chr2	26677928	G	A	0.244318	0.288654	0.0026322
ENSBTAG00000010743	FASTKD1	Chr2	26694017	2:26648968:A:G	Chr2	26648968	A	G	0.310606	0.237565	4.90357e-08
ENSBTAG00000004557	DHRS9	Chr2	27092118	2:27052683:A:T	Chr2	27052683	T	A	0.0833333	0.171121	4.08612e-07
ENSBTAG00000044179	CERS6	Chr2	27712447	2:27684625:G:A	Chr2	27684625	G	A	0.270833	-3.34733e-07	6.16978e-10
ENSBTAG00000017162	STK39	Chr2	27870257	2:27852976:C:A	Chr2	27852976	C	A	0.0454545	0.239184	0.000675301
ENSBTAG00000002425	SCN9A	Chr2	29996677	2:30126481:T:A	Chr2	30126481	T	A	0.397727	0.434809	3.23736e-05
ENSBTAG00000016512	TTC21B	Chr2	30336544	2:31002242:A:G	Chr2	31002242	A	G	0.200758	-0.154387	1.09643e-05
ENSBTAG00000050020	NA	Chr2	31096288	2:31097105:T:C	Chr2	31097105	T	C	0.416667	-0.468101	1.81573e-24
ENSBTAG00000019385	SCN3A	Chr2	31103232	2:31054438:GA:G	Chr2	31054438	GA	G	0.424242	-0.222207	9.15444e-30
ENSBTAG00000007650	SLC38A11	Chr2	31290314	2:31300193:C:A	Chr2	31300193	C	A	0.172348	0.331176	1.01326e-15
ENSBTAG00000018446	GCA	Chr2	34087612	2:34120079:G:GTA	Chr2	34120079	G	GTA	0.208333	-0.258652	0.00741565
ENSBTAG00000008142	IFIH1	Chr2	34111731	2:34116823:G:T	Chr2	34116823	G	T	0.229167	0.183974	0.000974329
ENSBTAG00000048246	DPP4	Chr2	34382576	2:34383524:C:A	Chr2	34383524	A	C	0.492424	-0.178132	1.53e-15
ENSBTAG00000006654	TANK	Chr2	35239417	2:34593736:C:T	Chr2	34593736	C	T	0.0757576	-0.117193	0.000309501
ENSBTAG00000005180	RBMS1	Chr2	35855478	2:34939921:A:G	Chr2	34939921	A	G	0.32197	0.161676	0.00344197
ENSBTAG00000032515	PLA2R1	Chr2	36271244	2:36278859:A:G	Chr2	36278859	A	G	0.367424	0.607768	9.22137e-18
ENSBTAG00000017797	LY75	Chr2	36454505	2:36515830:A:C	Chr2	36515830	A	C	0.263258	-0.355275	1.98623e-11
ENSBTAG00000038195	CD302	Chr2	36552661	2:36506895:T:C	Chr2	36506895	T	C	0.225379	-0.238863	1.19054e-07
ENSBTAG00000020654	BAZ2B	Chr2	36715263	2:37056638:C:T	Chr2	37056638	C	T	0.151515	0.112923	6.33715e-07
ENSBTAG00000004184	WDSUB1	Chr2	37061968	2:37335811:C:T	Chr2	37335811	C	T	0.0871212	0.144065	1.39873e-07
ENSBTAG00000004177	TANC1	Chr2	37386059	2:37366295:C:CTT	Chr2	37366295	C	CTT	0.217803	0.176569	3.92667e-11
ENSBTAG00000032481	DAPL1	Chr2	37515045	2:37554038:T:C	Chr2	37554038	C	T	0.445076	-0.14205	1.15489e-06
ENSBTAG00000013773	PKP4	Chr2	37901601	2:37778284:C:A	Chr2	37778284	C	A	0.168561	0.945622	7.75987e-13
ENSBTAG00000011909	ACVR1	Chr2	38466455	2:38391542:C:G	Chr2	38391542	C	G	0.426136	-0.181864	3.61314e-05
ENSBTAG00000009770	GPD2	Chr2	39803015	2:39811722:T:A	Chr2	39811722	T	A	0.157197	0.271912	0.00158237
ENSBTAG00000047365	NA	Chr2	43462208	2:43516536:C:T	Chr2	43516536	C	T	0.092803	0.307846	0.00992182
ENSBTAG00000001435	ARL6IP6	Chr2	43469180	2:43324608:C:T	Chr2	43324608	T	C	0.149621	-0.160015	0.00248696
ENSBTAG00000048151	PRPF40A	Chr2	43470325	2:43370867:ACATTTCCCC:A	Chr2	43370867	ACATTTCCCC	A	0.179924	0.25821	0.000211402
ENSBTAG00000026851	FMNL2	Chr2	43866708	2:43865133:TA:T	Chr2	43865133	TA	T	0.38447	0.551645	7.24276e-17
ENSBTAG00000002297	CACNB4	Chr2	44073032	2:44334360:A:T	Chr2	44334360	T	A	0.172348	0.505842	1.0258e-05
ENSBTAG00000002293	ARL5A	Chr2	44355897	2:44766809:T:TA	Chr2	44766809	T	TA	0.094697	-0.199816	3.91274e-06
ENSBTAG00000006907	NEB	Chr2	44434402	2:44812424:A:G	Chr2	44812424	A	G	0.0625	-0.295891	0.0197286
ENSBTAG00000021020	RIF1	Chr2	44709690	2:44807851:T:C	Chr2	44807851	C	T	0.109848	-0.0570645	0.0118136
ENSBTAG00000007239	TNFAIP6	Chr2	44764214	2:44807617:T:C	Chr2	44807617	C	T	0.210227	-0.234097	1.54476e-12
ENSBTAG00000032369	NMI	Chr2	44826001	2:44792439:A:G	Chr2	44792439	G	A	0.30303	0.237593	9.65482e-10
ENSBTAG00000016217	RBM43	Chr2	44857603	2:44858072:G:A	Chr2	44858072	G	A	0.128788	-0.282644	1.74512e-06
ENSBTAG00000039731	RND3	Chr2	45698140	2:44913197:T:C	Chr2	44913197	T	C	0.200758	-0.257554	0.00102188
ENSBTAG00000015962	MMADHC	Chr2	46549090	2:46591004:A:T	Chr2	46591004	A	T	0.388258	-0.27745	9.08235e-12
ENSBTAG00000019592	MBD5	Chr2	47756040	2:48371742:A:T	Chr2	48371742	T	A	0.494318	0.158935	0.00560446
ENSBTAG00000001132	GTDC1	Chr2	52388548	2:52426874:A:G	Chr2	52426874	A	G	0.244318	0.270945	2.05553e-12
ENSBTAG00000032289	ARHGAP15	Chr2	53630365	2:53724341:G:A	Chr2	53724341	G	A	0.125	-0.142557	0.000179082
ENSBTAG00000032277	KYNU	Chr2	53888583	2:53870835:G:A	Chr2	53870835	G	A	0.238636	-0.365031	5.60775e-09
ENSBTAG00000014432	HNMT	Chr2	59180569	2:59376275:A:T	Chr2	59376275	A	T	0.267045	-0.137926	6.39292e-06
ENSBTAG00000009949	DARS1	Chr2	61390061	2:61210704:G:T	Chr2	61210704	G	T	0.486742	0.176694	0.00217105
ENSBTAG00000015172	MCM6	Chr2	61489618	2:61471983:T:A	Chr2	61471983	T	A	0.0833333	-0.156254	3.28411e-12
ENSBTAG00000015169	UBXN4	Chr2	61617901	2:61670179:G:C	Chr2	61670179	G	C	0.157197	0.25414	0.000293531
ENSBTAG00000013302	R3HDM1	Chr2	61799766	2:61937074:T:C	Chr2	61937074	C	T	0.456439	-0.176242	0.000201907
ENSBTAG00000026842	ZRANB3	Chr2	61831041	2:61350730:A:G	Chr2	61350730	A	G	0.479167	-0.24593	5.15072e-12
ENSBTAG00000013449	RAB3GAP1	Chr2	62238789	2:62374532:C:G	Chr2	62374532	C	G	0.225379	-0.135429	8.04638e-13
ENSBTAG00000014158	CCNT2	Chr2	62352405	2:61549542:A:G	Chr2	61549542	A	G	0.0208333	-0.97489	0.00021015
ENSBTAG00000018753	TMEM163	Chr2	62513123	2:62532016:AG:A	Chr2	62532016	AG	A	0.0625	-0.7065	0.000513532
ENSBTAG00000018744	MGAT5	Chr2	63181459	2:63157021:C:G	Chr2	63157021	C	G	0.282197	-0.101506	0.000131714
ENSBTAG00000021103	SLC35F5	Chr2	65377141	2:65596409:G:T	Chr2	65596409	G	T	0.482955	-0.110162	0.00143775
ENSBTAG00000010221	CCDC93	Chr2	69664403	2:69917806:C:T	Chr2	69917806	C	T	0.388258	0.196685	0.00284764
ENSBTAG00000010599	C2H2orf76	Chr2	71192356	2:71045463:T:C	Chr2	71045463	T	C	0.496212	-0.24806	1.68026e-06
ENSBTAG00000009517	DBI	Chr2	71192389	2:71200516:T:TGCGGGGG	Chr2	71200516	TGCGGGGG	T	0.375954	-0.101852	2.6716e-27
ENSBTAG00000009058	TMEM177	Chr2	71480989	2:71478094:A:C	Chr2	71478094	A	C	0.409091	0.472744	1.08005e-13
ENSBTAG00000026829	TMEM185B	Chr2	71941225	2:72870230:C:T	Chr2	72870230	T	C	0.198864	-0.284786	6.0545e-05
ENSBTAG00000019781	CLASP1	Chr2	73306346	2:74223919:TTCATACCC:T	Chr2	74223919	TTCATACCC	T	0.208333	0.0827168	1.79861e-05
ENSBTAG00000019387	NIFK	Chr2	73397873	2:73820201:T:C	Chr2	73820201	C	T	0.327652	-0.140998	0.0121448
ENSBTAG00000006059	TSN	Chr2	73398068	2:73162885:GAT:G	Chr2	73162885	G	GAT	0.181818	0.167997	0.000274526
ENSBTAG00000014863	GYPC	Chr2	78885395	2:78928433:C:T	Chr2	78928433	T	C	0.3125	0.147324	1.01556e-06
ENSBTAG00000007863	GLS	Chr2	79427773	2:79046764:C:T	Chr2	79046764	C	T	0.386364	0.3186	3.37925e-14
ENSBTAG00000051479	NA	Chr2	79465118	2:79611776:T:C	Chr2	79611776	C	T	0.435606	0.203041	8.26174e-10
ENSBTAG00000018497	CAVIN2	Chr2	80494572	2:80583034:G:GA	Chr2	80583034	GA	G	0.331439	0.353507	0.000242496
ENSBTAG00000016784	DNAH7	Chr2	84632137	2:84596553:C:T	Chr2	84596553	T	C	0.253788	-0.281857	2.0819e-07
ENSBTAG00000013196	STK17B	Chr2	84723198	2:85357137:T:C	Chr2	85357137	C	T	0.0700758	0.18323	0.0159348
ENSBTAG00000020696	HECW2	Chr2	85088822	2:84929479:TA:T	Chr2	84929479	TA	T	0.193182	-0.263295	0.00124293
ENSBTAG00000017695	CCDC150	Chr2	85236758	2:85337768:G:GA	Chr2	85337768	G	GA	0.0397727	-0.580053	4.44265e-06
ENSBTAG00000007779	GTF3C3	Chr2	85393083	2:85224009:C:T	Chr2	85224009	C	T	0.0284091	-0.702163	1.44018e-10
ENSBTAG00000020416	PGAP1	Chr2	85508402	2:85632419:C:T	Chr2	85632419	C	T	0.128788	0.247534	0.00574936
ENSBTAG00000031696	ANKRD44	Chr2	85752864	2:85874711:A:C	Chr2	85874711	C	A	0.0378788	-0.241959	0.00652119
ENSBTAG00000051056	NA	Chr2	85899115	2:85929378:G:A	Chr2	85929378	G	A	0.204545	0.238414	0.0104814
ENSBTAG00000012586	HSPD1	Chr2	86045870	2:86879708:G:GT	Chr2	86879708	G	GT	0.0359848	-0.252882	0.0270972
ENSBTAG00000002056	MARS2	Chr2	86189672	2:86230462:AT:A	Chr2	86230462	A	AT	0.337121	-0.233737	0.000583753
ENSBTAG00000019232	TYW5	Chr2	88519396	2:87741359:C:T	Chr2	87741359	C	T	0.17803	-0.256886	0.000386087
ENSBTAG00000016092	SPATS2L	Chr2	88832855	2:88944074:G:T	Chr2	88944074	G	T	0.373106	0.235415	1.69376e-08
ENSBTAG00000002272	KCTD18	Chr2	89056404	2:89029850:C:CCT	Chr2	89029850	C	CCT	0.185606	-0.363087	2.66433e-18
ENSBTAG00000031579	SGO2	Chr2	89070546	2:89560548:T:C	Chr2	89560548	T	C	0.0189394	0.629337	0.00011763
ENSBTAG00000009725	AOX1	Chr2	89102214	2:89177143:T:C	Chr2	89177143	T	C	0.0625	1.32554	2.57696e-16
ENSBTAG00000006049	BZW1	Chr2	89470524	2:89744281:C:T	Chr2	89744281	T	C	0.433712	-0.0957288	5.71777e-07
ENSBTAG00000005416	PPIL3	Chr2	89530269	2:89527147:A:G	Chr2	89527147	G	A	0.291667	-0.303568	1.85427e-09
ENSBTAG00000018282	NIF3L1	Chr2	89532884	2:90426690:G:GC	Chr2	90426690	G	GC	0.420455	0.17125	0.0246118
ENSBTAG00000031473	ORC2	Chr2	89589796	2:89583020:T:A	Chr2	89583020	T	A	0.111742	-0.153096	0.0184653
ENSBTAG00000021201	FAM126B	Chr2	89661226	2:88824001:T:C	Chr2	88824001	C	T	0.433712	-0.215794	0.000529851
ENSBTAG00000012760	NDUFB3	Chr2	89662428	2:89939191:T:C	Chr2	89939191	T	C	0.274621	0.336287	4.66169e-08
ENSBTAG00000012334	FLACC1	Chr2	89924382	2:89831185:T:C	Chr2	89831185	C	T	0.422348	0.34492	0.0121591
ENSBTAG00000014933	TRAK2	Chr2	90008545	2:90303476:G:A	Chr2	90303476	G	A	0.276515	-0.0499867	0.0154251
ENSBTAG00000019298	STRADB	Chr2	90008659	2:89984302:A:G	Chr2	89984302	A	G	0.479167	-0.224246	0.0137309
ENSBTAG00000007395	ALS2	Chr2	90296359	2:90430629:T:C	Chr2	90430629	T	C	0.409091	0.203311	9.56898e-09
ENSBTAG00000006420	BMPR2	Chr2	90864690	2:91546465:T:A	Chr2	91546465	T	A	0.147727	0.167263	2.44427e-05
ENSBTAG00000048876	FAM117B	Chr2	91060089	2:91330047:G:A	Chr2	91330047	A	G	0.44697	-0.144222	0.00664407
ENSBTAG00000016000	CARF	Chr2	91242785	2:91240365:T:C	Chr2	91240365	C	T	0.234848	0.375294	6.58622e-08
ENSBTAG00000021596	ICOS	Chr2	92144570	2:91518097:A:G	Chr2	91518097	A	G	0.401515	0.148034	0.00490231
ENSBTAG00000010293	PARD3B	Chr2	93255172	2:92730782:C:T	Chr2	92730782	T	C	0.488636	0.52555	2.12653e-16
ENSBTAG00000053833	NA	Chr2	93887714	2:92930508:T:C	Chr2	92930508	C	T	0.433712	0.302605	2.73986e-10
ENSBTAG00000021979	EEF1B2	Chr2	94490095	2:94652548:GT:G	Chr2	94652548	GT	G	0.0549242	0.334134	1.63881e-12
ENSBTAG00000016193	FASTKD2	Chr2	95064721	2:95064713:A:G	Chr2	95064713	A	G	0.44697	0.390184	1.66085e-12
ENSBTAG00000052083	METTL21A	Chr2	95920426	2:95903478:T:C	Chr2	95903478	T	C	0.469697	-0.269217	1.19166e-06
ENSBTAG00000007830	PLEKHM3	Chr2	96318495	2:96183761:C:CT	Chr2	96183761	C	CT	0.157197	-0.102412	9.37707e-06
ENSBTAG00000020527	IDH1	Chr2	96532002	2:96522837:A:G	Chr2	96522837	G	A	0.410985	0.098161	3.33956e-07
ENSBTAG00000002177	PIKFYVE	Chr2	96557845	2:96587213:AT:A	Chr2	96587213	A	AT	0.287072	-0.40583	1.75331e-12
ENSBTAG00000018130	MAP2	Chr2	97414230	2:97781981:A:G	Chr2	97781981	A	G	0.0435606	-0.342892	0.000691864
ENSBTAG00000054647	RPE	Chr2	97826471	2:97845757:T:TA	Chr2	97845757	T	TA	0.189394	-0.199321	8.26135e-05
ENSBTAG00000021600	KANSL1L	Chr2	97972682	2:98314242:G:A	Chr2	98314242	G	A	0.255682	0.335809	4.07143e-12
ENSBTAG00000015066	LANCL1	Chr2	98237653	2:98202081:C:G	Chr2	98202081	G	C	0.299242	0.461435	2.70024e-21
ENSBTAG00000033690	BARD1	Chr2	102854286	2:102877959:A:G	Chr2	102877959	A	G	0.3125	-0.170874	0.00317788
ENSBTAG00000019274	ATIC	Chr2	103327790	2:103334776:C:T	Chr2	103334776	C	T	0.113636	0.220755	7.89728e-12
ENSBTAG00000008300	FN1	Chr2	103431472	2:103326888:G:A	Chr2	103326888	G	A	0.0511364	0.669786	1.05355e-05
ENSBTAG00000013215	MREG	Chr2	104038722	2:103883490:T:TA	Chr2	103883490	T	TA	0.160985	0.221024	7.90052e-07
ENSBTAG00000006821	PECR	Chr2	104116082	2:104179601:G:A	Chr2	104179601	G	A	0.462121	-0.209602	1.56262e-05
ENSBTAG00000010426	XRCC5	Chr2	104134457	2:104095350:T:C	Chr2	104095350	T	C	0.441288	0.121546	0.00855538
ENSBTAG00000003843	SMARCAL1	Chr2	104423002	2:104437054:G:A	Chr2	104437054	G	A	0.346591	0.205963	0.000779592
ENSBTAG00000002485	TNS1	Chr2	106118422	2:106943783:TC:T	Chr2	106943783	T	TC	0.251894	-0.171405	0.00638676
ENSBTAG00000003327	RUFY4	Chr2	106154129	2:107114876:A:G	Chr2	107114876	G	A	0.308712	-0.195767	0.00396099
ENSBTAG00000038042	CXCR2	Chr2	106185021	2:106110201:T:C	Chr2	106110201	C	T	0.223485	-0.122466	0.0156461
ENSBTAG00000042880	NA	Chr2	106259879	2:106259392:G:A	Chr2	106259392	A	G	0.212121	0.309589	3.61897e-25
ENSBTAG00000003923	GPBAR1	Chr2	106290034	2:106830988:C:A	Chr2	106830988	C	A	0.0359848	-0.885311	1.35717e-15
ENSBTAG00000003927	AAMP	Chr2	106298509	2:106118872:A:C	Chr2	106118872	A	C	0.0909091	0.147986	0.00284257
ENSBTAG00000015520	SLC11A1	Chr2	106392591	2:106999357:T:C	Chr2	106999357	T	C	0.287879	-0.143027	1.8308e-06
ENSBTAG00000003807	CNOT9	Chr2	106532970	2:106245899:G:C	Chr2	106245899	G	C	0.0511364	0.451053	0.00369056
ENSBTAG00000003819	STK36	Chr2	106633222	2:106602121:T:C	Chr2	106602121	T	C	0.0473485	0.816553	4.70304e-05
ENSBTAG00000018415	TTLL4	Chr2	106656155	2:106744988:A:G	Chr2	106744988	G	A	0.291667	0.288719	1.01059e-07
ENSBTAG00000013489	CYP27A1	Chr2	106739390	2:106806102:C:T	Chr2	106806102	T	C	0.147727	4.04394e-07	2.66018e-15
ENSBTAG00000009217	WNT10A	Chr2	106842325	2:106186132:A:G	Chr2	106186132	G	A	0.443182	-0.282713	0.0151814
ENSBTAG00000031041	NHEJ1	Chr2	107112857	2:106944176:C:T	Chr2	106944176	C	T	0.236742	0.145735	0.00102064
ENSBTAG00000012619	CNPPD1	Chr2	107126587	2:107351411:GA:G	Chr2	107351411	GA	G	0.162879	0.185789	0.00224684
ENSBTAG00000020608	ATG9A	Chr2	107179679	2:107145005:G:A	Chr2	107145005	A	G	0.403409	0.115543	0.0176363
ENSBTAG00000020610	ANKZF1	Chr2	107179984	2:107012960:G:A	Chr2	107012960	G	A	0.0416667	-0.423308	0.000170042
ENSBTAG00000021514	DNPEP	Chr2	107321008	2:107391416:G:C	Chr2	107391416	G	C	0.0763889	-0.201857	6.57112e-07
ENSBTAG00000020539	CHPF	Chr2	107472033	2:107044490:G:A	Chr2	107044490	G	A	0.109848	0.416696	0.00278269
ENSBTAG00000038992	STK11IP	Chr2	107521190	2:107531851:G:T	Chr2	107531851	T	G	0.496183	-0.166838	0.000333392
ENSBTAG00000046649	SGPP2	Chr2	110589562	2:110667574:G:GAT	Chr2	110667574	G	GAT	0.094697	0.396693	0.0179016
ENSBTAG00000011649	FARSB	Chr2	110820175	2:110231744:TA:T	Chr2	110231744	TA	T	0.0511364	-0.24146	0.00356135
ENSBTAG00000017258	ACSL3	Chr2	111037665	2:110174621:C:T	Chr2	110174621	C	T	0.0378788	-0.662861	2.63084e-07
ENSBTAG00000011133	AP1S3	Chr2	111965169	2:111906454:C:T	Chr2	111906454	T	C	0.272727	-0.286502	4.64629e-07
ENSBTAG00000016951	WDFY1	Chr2	112064142	2:112175967:T:C	Chr2	112175967	T	C	0.445076	0.196398	0.000721337
ENSBTAG00000011514	MRPL44	Chr2	112068966	2:112531916:C:T	Chr2	112531916	C	T	0.0587121	-0.502492	0.00403304
ENSBTAG00000008717	SERPINE2	Chr2	112158159	2:112159954:T:C	Chr2	112159954	T	C	0.342803	-0.122342	2.62877e-05
ENSBTAG00000021769	CUL3	Chr2	112699754	2:112826266:T:C	Chr2	112826266	C	T	0.448864	-0.130927	0.000519355
ENSBTAG00000000581	DOCK10	Chr2	113100311	2:113037087:G:T	Chr2	113037087	T	G	0.339015	-0.215974	6.00792e-05
ENSBTAG00000021319	MFF	Chr2	115486533	2:115502420:A:G	Chr2	115502420	A	G	0.130682	-0.302421	9.96028e-09
ENSBTAG00000037640	PID1	Chr2	117290403	2:117680495:G:C	Chr2	117680495	G	C	0.0757576	0.786597	3.26583e-10
ENSBTAG00000016063	DNER	Chr2	117771065	2:118177604:C:T	Chr2	118177604	C	T	0.0852273	1.29352	2.26335e-14
ENSBTAG00000021653	TRIP12	Chr2	117918447	2:118351102:G:A	Chr2	118351102	A	G	0.200758	-0.194559	0.000355738
ENSBTAG00000007280	NA	Chr2	118153658	2:118138284:T:TAA	Chr2	118138284	T	TAA	0.25947	-0.172519	2.52934e-11
ENSBTAG00000015752	SP110	Chr2	118232898	2:118203344:G:A	Chr2	118203344	G	A	0.0965909	0.283434	2.75656e-08
ENSBTAG00000009664	NA	Chr2	118237532	2:118285760:A:T	Chr2	118285760	T	A	0.488636	0.141834	9.40296e-09
ENSBTAG00000047133	NA	Chr2	118309403	2:118285976:C:G	Chr2	118285976	G	C	0.488636	0.168425	4.17945e-09
ENSBTAG00000054636	NA	Chr2	118332558	2:117857593:T:C	Chr2	117857593	T	C	0.253788	-0.352876	0.000393424
ENSBTAG00000037702	SP140L	Chr2	118362311	2:118308441:C:G	Chr2	118308441	G	C	0.488636	-0.121561	0.00324031
ENSBTAG00000040055	CAB39	Chr2	118530389	2:118942197:T:C	Chr2	118942197	T	C	0.0246212	0.278158	0.0010583
ENSBTAG00000017855	ITM2C	Chr2	118666035	2:118691788:T:A	Chr2	118691788	T	A	0.183712	0.29525	6.60296e-07
ENSBTAG00000017431	GPR55	Chr2	118715459	2:118448248:G:T	Chr2	118448248	G	T	0.19697	0.353656	0.00597332
ENSBTAG00000005119	PSMD1	Chr2	118865175	2:119006832:A:G	Chr2	119006832	A	G	0.327652	0.199863	0.000185227
ENSBTAG00000018502	ARMC9	Chr2	118967306	2:118952314:G:A	Chr2	118952314	G	A	0.263258	-0.379203	0.0190509
ENSBTAG00000017684	NMUR1	Chr2	119291748	2:119306935:G:C	Chr2	119306935	C	G	0.325758	0.496709	1.39458e-11
ENSBTAG00000054422	NA	Chr2	119365630	2:119367030:A:T	Chr2	119367030	T	A	0.223485	0.466509	0.00228778
ENSBTAG00000002549	PTMA	Chr2	119414108	2:119414502:G:A	Chr2	119414502	G	A	0.403409	-0.143076	5.14388e-10
ENSBTAG00000011964	DIS3L2	Chr2	119630439	2:119585975:GA:G	Chr2	119585975	GA	G	0.0795455	0.551893	9.5179e-06
ENSBTAG00000010598	EIF4E2	Chr2	120187398	2:120148079:T:TTAG	Chr2	120148079	T	TTAG	0.102273	-0.234924	0.000187904
ENSBTAG00000012629	ZNF362	Chr2	120436409	2:119567223:C:G	Chr2	119567223	C	G	0.323864	0.23018	0.000989038
ENSBTAG00000020671	TRIM62	Chr2	120514778	2:120867689:CCT:C	Chr2	120867689	CCT	C	0.439394	-0.195408	0.0156065
ENSBTAG00000017605	AK2	Chr2	120653449	2:120150290:A:G	Chr2	120150290	A	G	0.123106	-0.180034	0.00279035
ENSBTAG00000018067	S100PBP	Chr2	120849384	2:120078412:T:A	Chr2	120078412	A	T	0.132576	-0.130986	0.00284495
ENSBTAG00000015103	IQCC	Chr2	121320573	2:120986696:T:C	Chr2	120986696	C	T	0.339015	0.345828	0.00466157
ENSBTAG00000040518	NA	Chr2	121801090	2:121752499:A:C	Chr2	121752499	A	C	0.206439	-0.307426	1.36197e-05
ENSBTAG00000039121	PTP4A2	Chr2	121808000	2:122391911:AT:A	Chr2	122391911	AT	A	0.0719697	-0.238957	0.0113538
ENSBTAG00000010378	PEF1	Chr2	122077522	2:122078984:T:C	Chr2	122078984	T	C	0.246212	-0.174534	2.13209e-08
ENSBTAG00000035081	SERINC2	Chr2	122259028	2:122240916:T:TTTGTTTG	Chr2	122240916	T	TTTGTTTG	0.202652	-0.142529	0.000334077
ENSBTAG00000016819	FABP3	Chr2	122285621	2:122391911:AT:A	Chr2	122391911	AT	A	0.0719697	0.649441	8.96516e-23
ENSBTAG00000016817	SNRNP40	Chr2	122347181	2:122392597:G:A	Chr2	122392597	A	G	0.200758	0.303614	0.000511304
ENSBTAG00000016818	ZCCHC17	Chr2	122347439	2:121911505:A:G	Chr2	121911505	A	G	0.253788	-0.222455	0.00510057
ENSBTAG00000018979	PUM1	Chr2	122527754	2:122703779:G:A	Chr2	122703779	G	A	0.477273	-0.127266	0.00375438
ENSBTAG00000005477	LAPTM5	Chr2	122807360	2:122817831:T:C	Chr2	122817831	C	T	0.0340909	-0.321148	5.0816e-10
ENSBTAG00000017253	MECR	Chr2	124332403	2:124363357:A:C	Chr2	124363357	A	C	0.117424	0.434679	5.9651e-12
ENSBTAG00000013309	SRSF4	Chr2	124374951	2:124250138:C:A	Chr2	124250138	A	C	0.142045	0.314617	0.0183198
ENSBTAG00000048228	NA	Chr2	124850785	2:124851209:G:T	Chr2	124851209	G	T	0.125	-0.494703	0.000442401
ENSBTAG00000050344	SNORA73	Chr2	124916672	2:124651827:C:A	Chr2	124651827	C	A	0.0530303	0.358567	0.00613951
ENSBTAG00000002363	SESN2	Chr2	125132377	2:125138330:C:T	Chr2	125138330	T	C	0.153409	0.372387	7.58307e-07
ENSBTAG00000027051	PTAFR	Chr2	125201952	2:124591798:G:A	Chr2	124591798	G	A	0.375	0.199937	1.86777e-05
ENSBTAG00000043989	EYA3	Chr2	125249518	2:125350409:C:T	Chr2	125350409	C	T	0.331439	-0.46454	1.28843e-09
ENSBTAG00000008800	XKR8	Chr2	125400258	2:124808137:TACAC:T	Chr2	124808137	TACAC	T	0.0833333	-0.384806	0.0210505
ENSBTAG00000006225	RPA2	Chr2	125448289	2:125689254:G:A	Chr2	125689254	G	A	0.348485	0.185318	0.00039471
ENSBTAG00000006223	THEMIS2	Chr2	125486124	2:125472936:G:A	Chr2	125472936	G	A	0.25947	-0.0909799	0.000591129
ENSBTAG00000003866	PPP1R8	Chr2	125545896	2:125547109:G:C	Chr2	125547109	G	C	0.147727	-0.14071	0.00663348
ENSBTAG00000001192	STX12	Chr2	125585869	2:125567847:C:T	Chr2	125567847	C	T	0.289773	-0.271376	3.72801e-05
ENSBTAG00000019614	FAM76A	Chr2	125635148	2:125558013:T:C	Chr2	125558013	T	C	0.170455	-0.345589	4.38345e-07
ENSBTAG00000007554	IFI6	Chr2	125662056	2:125664045:G:GGC	Chr2	125664045	G	GGC	0.166667	-0.393873	8.9029e-08
ENSBTAG00000010254	MAP3K6	Chr2	125921163	2:125879518:C:T	Chr2	125879518	C	T	0.0890151	-0.308463	5.02753e-11
ENSBTAG00000008766	SLC9A1	Chr2	126090280	2:126762062:A:AT	Chr2	126762062	A	AT	0.38447	0.184964	0.000470723
ENSBTAG00000004416	NUDC	Chr2	126286771	2:126277365:T:C	Chr2	126277365	C	T	0.0890151	0.283733	1.3868e-05
ENSBTAG00000009796	PIGV	Chr2	126402241	2:126402189:C:T	Chr2	126402189	T	C	0.4375	0.883069	5.20948e-36
ENSBTAG00000005629	CRYBG2	Chr2	126775473	2:127003040:C:T	Chr2	127003040	C	T	0.393939	0.498217	5.9534e-19
ENSBTAG00000005628	CD52	Chr2	126806114	2:126938352:G:A	Chr2	126938352	G	A	0.212121	-0.147047	3.97199e-07
ENSBTAG00000009581	UBXN11	Chr2	126814238	2:126823653:G:A	Chr2	126823653	A	G	0.424242	0.363061	4.38125e-08
ENSBTAG00000009580	SH3BGRL3	Chr2	126839005	2:126838850:C:T	Chr2	126838850	C	T	0.168561	0.227144	6.40725e-11
ENSBTAG00000009579	CEP85	Chr2	126876537	2:126288789:G:A	Chr2	126288789	G	A	0.221591	0.338274	2.0395e-13
ENSBTAG00000001513	PDIK1L	Chr2	126975053	2:126576519:T:G	Chr2	126576519	T	G	0.202652	-0.299041	0.004524
ENSBTAG00000005105	PAFAH2	Chr2	127089779	2:126516720:C:G	Chr2	126516720	C	G	0.304924	0.265974	1.57187e-10
ENSBTAG00000013761	STMN1	Chr2	127152814	2:127156460:T:C	Chr2	127156460	T	C	0.0738636	0.242554	2.60646e-06
ENSBTAG00000021778	SELENON	Chr2	127272993	2:127476058:G:A	Chr2	127476058	A	G	0.498106	0.149193	2.44102e-08
ENSBTAG00000003069	MAN1C1	Chr2	127444339	2:127293280:G:A	Chr2	127293280	G	A	0.332061	0.155452	0.000123928
ENSBTAG00000001050	LDLRAP1	Chr2	127508799	2:127495358:G:A	Chr2	127495358	G	A	0.3125	0.227862	0.00350195
ENSBTAG00000002988	MACO1	Chr2	127609384	2:127487154:A:G	Chr2	127487154	A	G	0.369318	0.200736	9.95728e-05
ENSBTAG00000001296	TMEM50A	Chr2	127677708	2:127664164:C:T	Chr2	127664164	C	T	0.405303	-0.177475	1.02189e-06
ENSBTAG00000050474	RUNX3	Chr2	127998305	2:128326449:T:C	Chr2	128326449	C	T	0.482955	-0.181649	7.14577e-06
ENSBTAG00000012604	NCMAP	Chr2	128334929	2:128117580:T:C	Chr2	128117580	T	C	0.272727	0.289849	6.04673e-06
ENSBTAG00000017452	RCAN3	Chr2	128422500	2:128416994:C:G	Chr2	128416994	C	G	0.285985	-0.227884	3.92731e-08
ENSBTAG00000013048	NIPAL3	Chr2	128496459	2:128349492:TG:T	Chr2	128349492	T	TG	0.467803	-0.248498	2.49988e-06
ENSBTAG00000001101	IFNLR1	Chr2	128718563	2:128675746:G:A	Chr2	128675746	G	A	0.401515	-0.0871542	0.006417
ENSBTAG00000030435	PNRC2	Chr2	128942609	2:129045199:C:CAG	Chr2	129045199	C	CAG	0.146154	-0.131481	0.000581655
ENSBTAG00000019371	CNR2	Chr2	129001538	2:128962956:T:G	Chr2	128962956	T	G	0.204545	0.241929	8.60967e-10
ENSBTAG00000030434	FUCA1	Chr2	129056429	2:129628685:C:CT	Chr2	129628685	C	CT	0.0852273	1.21117	4.51454e-12
ENSBTAG00000021832	HMGCL	Chr2	129091482	2:129222524:T:C	Chr2	129222524	T	C	0.153409	-0.408048	0.00407994
ENSBTAG00000021620	PITHD1	Chr2	129130667	2:129130655:C:A	Chr2	129130655	A	C	0.393536	0.233275	1.06534e-10
ENSBTAG00000020905	RPL11	Chr2	129198058	2:129040960:GAAC:G	Chr2	129040960	G	GAAC	0.348485	0.098682	0.000788317
ENSBTAG00000052293	NA	Chr2	129242711	2:129211543:C:T	Chr2	129211543	T	C	0.375	0.455127	2.41881e-14
ENSBTAG00000014400	E2F2	Chr2	129326863	2:129628685:C:CT	Chr2	129628685	C	CT	0.0852273	-0.75608	5.02241e-10
ENSBTAG00000012263	ASAP3	Chr2	129367153	2:129628685:C:CT	Chr2	129628685	C	CT	0.0852273	-0.704903	0.000192319
ENSBTAG00000009500	KDM1A	Chr2	129836290	2:129672891:A:G	Chr2	129672891	A	G	0.380682	0.198909	1.70673e-09
ENSBTAG00000007153	C1QA	Chr2	130193588	2:130263013:C:T	Chr2	130263013	C	T	0.382129	0.123267	0.00985071
ENSBTAG00000016448	ZBTB40	Chr2	130333090	2:130019910:G:A	Chr2	130019910	G	A	0.246212	-0.14385	4.82326e-05
ENSBTAG00000040602	NA	Chr2	130806189	2:130809100:A:G	Chr2	130809100	G	A	0.267045	-0.263142	1.35903e-17
ENSBTAG00000017122	HSPG2	Chr2	130906819	2:130942037:G:T	Chr2	130942037	G	T	0.032197	0.790402	0.000203906
ENSBTAG00000008952	RAP1GAP	Chr2	131095682	2:131259338:C:T	Chr2	131259338	T	C	0.092803	0.194744	0.0105444
ENSBTAG00000008951	ALPL	Chr2	131245100	2:131172695:T:G	Chr2	131172695	T	G	0.11553	0.923773	4.37628e-22
ENSBTAG00000002977	ECE1	Chr2	131324609	2:131331488:CCA:C	Chr2	131331488	C	CCA	0.373106	0.245486	6.03504e-12
ENSBTAG00000040215	EIF4G3	Chr2	131485409	2:131444654:C:T	Chr2	131444654	C	T	0.488636	0.175283	1.9333e-05
ENSBTAG00000006085	DDOST	Chr2	131971820	2:131982789:T:C	Chr2	131982789	T	C	0.363636	-0.0825829	9.11469e-18
ENSBTAG00000006084	PINK1	Chr2	132006686	2:131386166:C:T	Chr2	131386166	T	C	0.479167	0.120978	5.14301e-08
ENSBTAG00000052516	CDA	Chr2	132042156	2:132876454:G:T	Chr2	132876454	G	T	0.191288	0.16012	2.5541e-07
ENSBTAG00000009156	CAMK2N1	Chr2	132136808	2:132047111:T:C	Chr2	132047111	T	C	0.36553	-0.272197	0.00166754
ENSBTAG00000040547	UBXN10	Chr2	132454775	2:132456311:C:A	Chr2	132456311	C	A	0.25947	-0.541316	8.70576e-06
ENSBTAG00000017108	OTUD3	Chr2	132831792	2:132755814:T:G	Chr2	132755814	T	G	0.414773	-0.38485	7.67118e-12
ENSBTAG00000007998	TMCO4	Chr2	132915933	2:132704222:C:T	Chr2	132704222	C	T	0.0700758	0.527094	8.93365e-07
ENSBTAG00000050219	NA	Chr2	133110076	2:132877048:A:G	Chr2	132877048	A	G	0.0852273	0.23464	0.000195064
ENSBTAG00000004554	CAPZB	Chr2	133201116	2:133412151:A:G	Chr2	133412151	A	G	0.168561	-0.217856	1.11592e-09
ENSBTAG00000013650	SLC66A1	Chr2	133363429	2:134350339:A:G	Chr2	134350339	A	G	0.219697	0.200569	0.001046
ENSBTAG00000012289	AKR7A2	Chr2	133363650	2:133371621:T:C	Chr2	133371621	T	C	0.329545	0.0887136	0.00173206
ENSBTAG00000011950	EMC1	Chr2	133406872	2:133421893:A:C	Chr2	133421893	A	C	0.420455	0.151018	3.45927e-09
ENSBTAG00000030335	ALDH4A1	Chr2	133756950	2:133763629:T:C	Chr2	133763629	T	C	0.117424	0.26716	2.49399e-20
ENSBTAG00000000684	ARHGEF10L	Chr2	135154958	2:135575910:TCCGCCC:T	Chr2	135575910	TCCGCCC	T	0.0894737	-0.257699	1.79837e-05
ENSBTAG00000008579	RCC2	Chr2	135211440	2:135307187:G:A	Chr2	135307187	G	A	0.346591	0.112109	0.00295003
ENSBTAG00000012052	PADI4	Chr2	135290548	2:135245860:G:A	Chr2	135245860	G	A	0.365019	-0.285335	1.93738e-07
ENSBTAG00000012043	PADI3	Chr2	135346269	2:136120242:A:G	Chr2	136120242	A	G	0.325758	0.301751	0.000291126
ENSBTAG00000003403	PADI2	Chr2	135473411	2:135535135:GA:G	Chr2	135535135	G	GA	0.397727	0.587069	5.1517e-16
ENSBTAG00000008314	SDHB	Chr2	135548908	2:135535205:A:G	Chr2	135535205	G	A	0.231061	0.213239	2.34366e-06
ENSBTAG00000008309	ATP13A2	Chr2	135586323	2:135594517:G:A	Chr2	135594517	G	A	0.248106	0.330736	1.96545e-09
ENSBTAG00000003822	CROCC	Chr2	135668617	2:135660396:C:T	Chr2	135660396	T	C	0.42803	0.102982	6.27014e-08
ENSBTAG00000013282	NECAP2	Chr2	135688455	2:135675489:C:T	Chr2	135675489	T	C	0.4375	0.65439	1.22291e-33
ENSBTAG00000013281	SPATA21	Chr2	135698557	2:135681975:G:A	Chr2	135681975	G	A	0.191288	0.991061	3.02568e-16
ENSBTAG00000009251	SZRD1	Chr2	135759581	2:135944845:G:A	Chr2	135944845	G	A	0.410985	-0.132463	0.00542967
ENSBTAG00000051080	NA	Chr2	135760966	2:135910866:C:A	Chr2	135910866	A	C	0.169847	0.184465	2.10245e-07
ENSBTAG00000008510	FBXO42	Chr2	135783523	2:135534112:G:A	Chr2	135534112	G	A	0.242424	-0.192553	0.0250299
ENSBTAG00000014221	CPLANE2	Chr2	135877623	2:135413005:C:T	Chr2	135413005	C	T	0.164773	-0.382306	0.020721
ENSBTAG00000037819	SFT2D2	Chr3	330047	3:329235:C:T	Chr3	329235	C	T	0.469697	-0.234318	1.23264e-08
ENSBTAG00000014151	RCSD1	Chr3	1083046	3:1449943:T:TG	Chr3	1449943	TG	T	0.268939	-0.166471	0.0251939
ENSBTAG00000008931	CREG1	Chr3	1148817	3:1140240:C:T	Chr3	1140240	C	T	0.308712	-0.20121	8.616e-21
ENSBTAG00000010456	TADA1	Chr3	2034405	3:2060549:TTAAAA:T	Chr3	2060549	TTAAAA	T	0.270833	-0.386319	1.11889e-17
ENSBTAG00000010775	POGK	Chr3	2069922	3:2045005:G:A	Chr3	2045005	G	A	0.378788	0.470623	1.05898e-15
ENSBTAG00000044150	UCK2	Chr3	3059465	3:2886727:G:C	Chr3	2886727	G	C	0.373106	-0.151227	0.00243247
ENSBTAG00000010009	TMCO1	Chr3	3105833	3:3033737:T:C	Chr3	3033737	C	T	0.270833	0.226236	1.63254e-05
ENSBTAG00000017852	ALDH9A1	Chr3	3220578	3:4024539:C:T	Chr3	4024539	C	T	0.032197	0.473921	4.51768e-09
ENSBTAG00000010265	MGST3	Chr3	3288716	3:2891982:T:C	Chr3	2891982	C	T	0.392045	-0.195833	0.00146752
ENSBTAG00000013801	PBX1	Chr3	4246502	3:4128674:A:T	Chr3	4128674	A	T	0.339015	0.220714	0.00712323
ENSBTAG00000005976	HSD17B7	Chr3	6664654	3:6646190:A:C	Chr3	6646190	C	A	0.397727	0.39639	4.55967e-10
ENSBTAG00000004885	DDR2	Chr3	6853843	3:6703980:C:T	Chr3	6703980	T	C	0.477273	0.266902	7.2062e-05
ENSBTAG00000010206	UAP1	Chr3	6938634	3:6936227:C:T	Chr3	6936227	C	T	0.418561	0.130316	3.16287e-19
ENSBTAG00000012694	UHMK1	Chr3	7000320	3:6999831:A:G	Chr3	6999831	A	G	0.403409	-0.323986	4.18984e-05
ENSBTAG00000054194	SH2D1B	Chr3	7067272	3:7096094:A:G	Chr3	7096094	A	G	0.388258	0.237393	1.43649e-07
ENSBTAG00000050790	NA	Chr3	7126810	3:7117813:G:A	Chr3	7117813	A	G	0.350379	0.193077	1.2807e-06
ENSBTAG00000010158	NOS1AP	Chr3	7264277	3:7467760:T:C	Chr3	7467760	C	T	0.399621	0.22552	0.00112756
ENSBTAG00000005227	ATF6	Chr3	7846132	3:7789855:G:C	Chr3	7789855	C	G	0.433712	0.305176	8.66892e-07
ENSBTAG00000021754	DUSP12	Chr3	7861112	3:7856870:G:C	Chr3	7856870	G	C	0.373106	-0.282198	6.359e-05
ENSBTAG00000034159	FCRLA	Chr3	7907964	3:7884488:G:C	Chr3	7884488	C	G	0.123106	-0.195046	1.35445e-07
ENSBTAG00000021842	FCGR2B	Chr3	7947765	3:7923855:C:T	Chr3	7923855	T	C	0.331439	0.0813039	7.70777e-05
ENSBTAG00000002096	FCGR3A	Chr3	8000300	3:8057584:TG:T	Chr3	8057584	TG	T	0.153409	0.228684	0.000113933
ENSBTAG00000039035	HSPA6	Chr3	8034120	3:8485794:G:C	Chr3	8485794	G	C	0.450758	-0.362259	0.000179038
ENSBTAG00000015856	CFAP126	Chr3	8143060	3:8208066:A:G	Chr3	8208066	G	A	0.477273	0.417048	3.34082e-09
ENSBTAG00000015853	SDHC	Chr3	8208058	3:8475315:T:C	Chr3	8475315	T	C	0.395833	-0.147272	0.00740324
ENSBTAG00000009213	TOMM40L	Chr3	8280141	3:8191801:A:C	Chr3	8191801	A	C	0.145833	0.219872	0.00132174
ENSBTAG00000024503	FCER1G	Chr3	8290169	3:8035788:TTC:T	Chr3	8035788	TTC	T	0.13447	0.135753	0.00419032
ENSBTAG00000002203	NDUFS2	Chr3	8300810	3:8468199:T:C	Chr3	8468199	T	C	0.170455	-0.246593	8.79662e-07
ENSBTAG00000021893	USP21	Chr3	8337654	3:8418194:G:A	Chr3	8418194	G	A	0.431818	0.292562	1.69556e-05
ENSBTAG00000021705	UFC1	Chr3	8362436	3:8282915:T:C	Chr3	8282915	T	C	0.166667	-0.143129	0.0020728
ENSBTAG00000017875	ARHGAP30	Chr3	8420192	3:8429115:G:A	Chr3	8429115	G	A	0.110465	0.274662	1.10983e-15
ENSBTAG00000017873	USF1	Chr3	8436891	3:8388303:T:C	Chr3	8388303	T	C	0.32197	-0.166704	0.000243555
ENSBTAG00000017856	TSTD1	Chr3	8442911	3:8452700:TA:T	Chr3	8452700	T	TA	0.498106	0.203429	1.18664e-05
ENSBTAG00000017846	F11R	Chr3	8464413	3:8438015:A:C	Chr3	8438015	A	C	0.130542	0.155325	5.54562e-07
ENSBTAG00000046231	NA	Chr3	8694109	3:8181088:CACTA:C	Chr3	8181088	CACTA	C	0.229167	-0.220043	0.00131251
ENSBTAG00000002947	LY9	Chr3	8788290	3:8788160:T:C	Chr3	8788160	C	T	0.242424	0.809448	5.67265e-51
ENSBTAG00000010458	NA	Chr3	8802582	3:8797094:C:T	Chr3	8797094	T	C	0.24053	-0.578785	1.48862e-12
ENSBTAG00000001197	SLAMF7	Chr3	8864962	3:8795739:AAAGT:A	Chr3	8795739	A	AAAGT	0.227273	-0.259474	3.1894e-10
ENSBTAG00000004334	NCSTN	Chr3	9350657	3:9240879:TTG:T	Chr3	9240879	TTG	T	0.301136	-0.13566	0.0130278
ENSBTAG00000007537	PEX19	Chr3	9399900	3:9377131:T:A	Chr3	9377131	T	A	0.0378788	-0.56256	3.29887e-06
ENSBTAG00000005793	PEA15	Chr3	9471684	3:9467916:AGT:A	Chr3	9467916	AGT	A	0.200758	0.252149	7.89875e-07
ENSBTAG00000002419	PIGM	Chr3	9644361	3:9626622:C:A	Chr3	9626622	A	C	0.297348	-0.358349	1.01475e-18
ENSBTAG00000004776	DUSP23	Chr3	9914349	3:9982320:AGAG:A	Chr3	9982320	AGAG	A	0.287879	-0.268201	0.00293239
ENSBTAG00000012887	FCER1A	Chr3	10425891	3:10796135:A:AATACTTCATGTTGC	Chr3	10796135	A	AATACTTCATGTTGC	0.308712	-0.259734	7.59105e-06
ENSBTAG00000011511	NA	Chr3	10700384	3:10820914:G:A	Chr3	10820914	G	A	0.369318	0.21975	0.00010412
ENSBTAG00000039366	NA	Chr3	11422750	3:11442964:A:G	Chr3	11442964	G	A	0.498106	-0.11262	2.02633e-11
ENSBTAG00000009421	CD1E	Chr3	11610099	3:10967868:T:G	Chr3	10967868	T	G	0.191288	0.239432	4.55599e-08
ENSBTAG00000038426	CD1B	Chr3	11717375	3:12180202:C:CTT	Chr3	12180202	C	CTT	0.30303	-0.356805	4.20462e-05
ENSBTAG00000022893	NA	Chr3	11749447	3:11803298:G:C	Chr3	11803298	C	G	0.494318	0.18906	4.99825e-17
ENSBTAG00000054063	CD1A	Chr3	11863244	3:11845841:C:CA	Chr3	11845841	C	CA	0.36692	-4.86846e-07	3.46877e-17
ENSBTAG00000039993	CD1D	Chr3	11919678	3:11438293:T:A	Chr3	11438293	T	A	0.145833	0.417822	1.77939e-24
ENSBTAG00000024960	NA	Chr3	12154133	3:12146133:T:C	Chr3	12146133	T	C	0.138258	-6.39628e-07	3.07782e-19
ENSBTAG00000053343	NA	Chr3	12253817	3:12253447:T:TCCGCAGCGCCGCCCGCCCCCA	Chr3	12253447	T	TCCGCAGCGCCGCCCGCCCCCA	0.452652	-0.571425	1.07577e-08
ENSBTAG00000051681	NA	Chr3	12631769	3:12635738:T:G	Chr3	12635738	G	T	0.308712	-0.684544	8.45788e-19
ENSBTAG00000039702	FCRL3	Chr3	12636942	3:13089011:A:AT	Chr3	13089011	A	AT	0.354167	0.220119	7.62752e-09
ENSBTAG00000054233	FCRL4	Chr3	12748566	3:12763716:C:CTT	Chr3	12763716	CTT	C	0.380682	0.419182	2.06431e-13
ENSBTAG00000000964	FCRL5	Chr3	12804192	3:12868900:A:G	Chr3	12868900	G	A	0.357955	0.24252	8.28892e-09
ENSBTAG00000053098	NA	Chr3	12991375	3:12989715:A:G	Chr3	12989715	G	A	0.494318	-0.27533	2.6079e-26
ENSBTAG00000052866	NA	Chr3	13068048	3:13944293:G:A	Chr3	13944293	A	G	0.431818	-0.238095	0.0053576
ENSBTAG00000049257	NA	Chr3	13433681	3:13725650:ACAGT:A	Chr3	13725650	ACAGT	A	0.0359848	-0.551482	0.00144816
ENSBTAG00000008649	ETV3	Chr3	13730371	3:13721941:T:C	Chr3	13721941	T	C	0.407197	0.322731	4.6547e-08
ENSBTAG00000012361	ARHGEF11	Chr3	13871482	3:13103707:A:G	Chr3	13103707	G	A	0.393939	-0.0829885	0.00353867
ENSBTAG00000012348	LRRC71	Chr3	13938001	3:13926073:A:C	Chr3	13926073	A	C	0.0587121	0.748361	0.00172968
ENSBTAG00000001518	ISG20L2	Chr3	14106348	3:14092136:C:T	Chr3	14092136	T	C	0.462121	-0.364273	4.55905e-05
ENSBTAG00000000406	GPATCH4	Chr3	14232919	3:14211500:G:C	Chr3	14211500	G	C	0.142045	-0.613727	8.28242e-12
ENSBTAG00000000404	NAXE	Chr3	14244262	3:14240713:C:G	Chr3	14240713	G	C	0.426136	0.277834	2.26484e-23
ENSBTAG00000006364	GLMP	Chr3	14506328	3:14628864:T:G	Chr3	14628864	T	G	0.0738636	0.449637	0.0198858
ENSBTAG00000009431	SLC25A44	Chr3	14592765	3:14086325:T:A	Chr3	14086325	A	T	0.462121	-0.18824	0.00103287
ENSBTAG00000012228	SEMA4A	Chr3	14627449	3:14626119:G:A	Chr3	14626119	G	A	0.259542	0.154336	5.186e-10
ENSBTAG00000011754	LAMTOR2	Chr3	14713057	3:13757939:C:T	Chr3	13757939	C	T	0.106061	0.233812	0.00570887
ENSBTAG00000001212	SSR2	Chr3	14754111	3:13853408:C:G	Chr3	13853408	C	G	0.214015	0.140599	0.0105955
ENSBTAG00000000113	ARHGEF2	Chr3	14781461	3:15173083:T:TA	Chr3	15173083	T	TA	0.0568182	0.312883	0.000333607
ENSBTAG00000051849	NA	Chr3	14841710	3:14944206:T:G	Chr3	14944206	T	G	0.138258	-0.320606	0.000299057
ENSBTAG00000000105	RIT1	Chr3	14853320	3:15126436:GA:G	Chr3	15126436	G	GA	0.441288	0.160409	7.60487e-08
ENSBTAG00000020356	GON4L	Chr3	14893063	3:14928835:G:A	Chr3	14928835	G	A	0.125	-0.392785	1.39814e-19
ENSBTAG00000045596	NA	Chr3	14913466	3:14967269:G:A	Chr3	14967269	A	G	0.378788	-0.443717	1.84512e-21
ENSBTAG00000011209	SYT11	Chr3	14949656	3:14880964:A:G	Chr3	14880964	G	A	0.488636	0.173653	1.09019e-12
ENSBTAG00000026613	MSTO1	Chr3	15042707	3:15450050:T:TC	Chr3	15450050	TC	T	0.385932	0.310659	2.32738e-05
ENSBTAG00000003954	ASH1L	Chr3	15121791	3:15467304:T:C	Chr3	15467304	C	T	0.392045	0.121321	0.000908361
ENSBTAG00000054061	RUSC1	Chr3	15310732	3:14833355:T:A	Chr3	14833355	A	T	0.431818	0.258552	1.22151e-13
ENSBTAG00000003948	FDPS	Chr3	15320377	3:14407154:A:C	Chr3	14407154	A	C	0.280769	-0.292517	0.000708659
ENSBTAG00000017056	PKLR	Chr3	15344676	3:14817155:T:C	Chr3	14817155	T	C	0.0625	-0.611818	0.00441713
ENSBTAG00000014840	MTX1	Chr3	15414531	3:15450050:T:TC	Chr3	15450050	TC	T	0.385932	-0.193466	5.0252e-05
ENSBTAG00000010617	KRTCAP2	Chr3	15444042	3:15384837:A:G	Chr3	15384837	G	A	0.363636	-0.245159	1.06266e-06
ENSBTAG00000003083	SLC50A1	Chr3	15465501	3:15463300:G:T	Chr3	15463300	G	T	0.0265152	0.633284	0.00070574
ENSBTAG00000020244	EFNA1	Chr3	15473164	3:15356796:T:G	Chr3	15356796	G	T	0.371212	-0.309965	0.000380648
ENSBTAG00000010663	ADAM15	Chr3	15548475	3:15557476:C:T	Chr3	15557476	T	C	0.289773	-0.145149	2.09705e-13
ENSBTAG00000021512	ZBTB7B	Chr3	15593999	3:15583102:G:C	Chr3	15583102	C	G	0.469697	-0.103773	0.00259177
ENSBTAG00000004552	PBXIP1	Chr3	15627233	3:15652375:C:T	Chr3	15652375	C	T	0.195076	-0.455016	4.45241e-14
ENSBTAG00000018249	KCNN3	Chr3	15725420	3:15795754:C:A	Chr3	15795754	C	A	0.314394	-0.312597	7.21248e-14
ENSBTAG00000020542	SHE	Chr3	16086188	3:16140822:C:T	Chr3	16140822	C	T	0.030303	-0.619364	0.0130643
ENSBTAG00000018474	IL6R	Chr3	16173990	3:16126420:G:A	Chr3	16126420	G	A	0.486742	0.136163	2.7213e-15
ENSBTAG00000005161	ATP8B2	Chr3	16232969	3:15983560:C:T	Chr3	15983560	C	T	0.327652	0.108237	0.0178199
ENSBTAG00000004271	UBAP2L	Chr3	16300420	3:17220927:C:T	Chr3	17220927	C	T	0.174242	0.110777	0.00807503
ENSBTAG00000020026	C3H1orf43	Chr3	16300764	3:16298506:A:G	Chr3	16298506	G	A	0.0776515	0.445724	1.83951e-12
ENSBTAG00000033217	TPM3	Chr3	16318633	3:16188577:C:T	Chr3	16188577	C	T	0.367424	-0.135153	4.61917e-05
ENSBTAG00000004987	NUP210L	Chr3	16347124	3:16344155:A:G	Chr3	16344155	A	G	0.132576	0.471928	6.19553e-09
ENSBTAG00000011284	SLC39A1	Chr3	16473116	3:16433645:C:T	Chr3	16433645	C	T	0.151515	-0.119986	0.00100341
ENSBTAG00000006678	GATAD2B	Chr3	16574944	3:16495563:A:G	Chr3	16495563	A	G	0.130682	-0.163849	0.0167424
ENSBTAG00000021862	SLC27A3	Chr3	16624026	3:16522300:A:G	Chr3	16522300	A	G	0.314394	-0.408608	0.00240688
ENSBTAG00000012470	SNAPIN	Chr3	16724347	3:16687063:G:A	Chr3	16687063	G	A	0.0984849	0.294991	3.17128e-13
ENSBTAG00000008238	S100A7	Chr3	16905299	3:16998901:C:T	Chr3	16998901	C	T	0.359848	-0.290742	0.00135801
ENSBTAG00000012640	S100A8	Chr3	17085578	3:17131394:C:T	Chr3	17131394	C	T	0.153409	-0.230477	2.85109e-06
ENSBTAG00000012638	S100A12	Chr3	17102723	3:17075778:T:C	Chr3	17075778	T	C	0.236742	0.135132	3.09589e-08
ENSBTAG00000006505	S100A9	Chr3	17117984	3:17107900:G:A	Chr3	17107900	G	A	0.153409	-0.256369	2.27957e-07
ENSBTAG00000054765	PGLYRP4	Chr3	17126513	3:17098769:C:T	Chr3	17098769	C	T	0.282197	0.179432	3.79681e-05
ENSBTAG00000015145	S100A11	Chr3	18727499	3:18729364:T:C	Chr3	18729364	T	C	0.380682	-0.150273	0.000669543
ENSBTAG00000015147	S100A10	Chr3	18762473	3:18812208:T:C	Chr3	18812208	T	C	0.316288	0.120204	1.23989e-07
ENSBTAG00000004772	THEM4	Chr3	18844274	3:19069668:G:A	Chr3	19069668	G	A	0.0227273	-1.00475	0.00979094
ENSBTAG00000001942	SNX27	Chr3	19166836	3:19025359:CT:C	Chr3	19025359	CT	C	0.0549242	-0.274928	0.0122822
ENSBTAG00000042218	NA	Chr3	19248438	3:19250573:A:G	Chr3	19250573	A	G	0.414773	0.406739	0.000338408
ENSBTAG00000017566	TUFT1	Chr3	19250840	3:19251135:G:A	Chr3	19251135	G	A	0.412879	5.38812e-07	1.84732e-24
ENSBTAG00000021289	POGZ	Chr3	19322592	3:19080955:CTGGGTA:C	Chr3	19080955	CTGGGTA	C	0.111742	-0.271098	0.000189525
ENSBTAG00000008091	SELENBP1	Chr3	19442662	3:19477574:G:GACAT	Chr3	19477574	G	GACAT	0.104167	-0.299659	0.0156209
ENSBTAG00000006099	PIP5K1A	Chr3	19611272	3:19632386:A:G	Chr3	19632386	A	G	0.310606	0.145132	0.00130228
ENSBTAG00000018074	VPS72	Chr3	19623987	3:19051602:A:G	Chr3	19051602	A	G	0.102273	-0.228155	0.00944411
ENSBTAG00000018071	TMOD4	Chr3	19637444	3:20234063:C:T	Chr3	20234063	C	T	0.329545	0.205721	0.0107908
ENSBTAG00000020395	LYSMD1	Chr3	19645438	3:19675012:G:C	Chr3	19675012	G	C	0.426136	-0.277054	4.36007e-06
ENSBTAG00000015369	MLLT11	Chr3	19726107	3:19726063:T:C	Chr3	19726063	T	C	0.19697	0.308768	4.23335e-08
ENSBTAG00000000098	SETDB1	Chr3	19834258	3:19013505:T:C	Chr3	19013505	T	C	0.318182	-0.336342	1.81129e-05
ENSBTAG00000021035	CTSK	Chr3	19953197	3:19953317:C:T	Chr3	19953317	T	C	0.285985	0.13735	0.000678516
ENSBTAG00000007123	ENSA	Chr3	20098777	3:20196824:A:G	Chr3	20196824	A	G	0.0814394	-0.583068	2.29836e-09
ENSBTAG00000003604	ADAMTSL4	Chr3	20155185	3:20470442:A:G	Chr3	20470442	A	G	0.147727	-0.271579	3.12713e-07
ENSBTAG00000003806	ECM1	Chr3	20191176	3:20184022:T:A	Chr3	20184022	A	T	0.308712	-0.403823	2.7833e-16
ENSBTAG00000003799	TARS2	Chr3	20202510	3:20184022:T:A	Chr3	20184022	A	T	0.308712	-0.31172	1.1018e-08
ENSBTAG00000016730	ANP32E	Chr3	20409568	3:21318595:A:G	Chr3	21318595	A	G	0.272727	-0.0808432	0.0010851
ENSBTAG00000004852	PLEKHO1	Chr3	20485097	3:19738603:T:A	Chr3	19738603	A	T	0.265152	0.121143	0.000186733
ENSBTAG00000020635	VPS45	Chr3	20556989	3:20554304:C:T	Chr3	20554304	C	T	0.337121	-0.1905	2.48547e-05
ENSBTAG00000001586	OTUD7B	Chr3	20611450	3:20612336:A:G	Chr3	20612336	A	G	0.359848	-0.262177	2.99029e-06
ENSBTAG00000012495	SF3B4	Chr3	20681759	3:21064253:C:A	Chr3	21064253	A	C	0.354167	0.251233	0.000807826
ENSBTAG00000006050	BOLA1	Chr3	20714518	3:20718096:C:T	Chr3	20718096	T	C	0.4375	-0.137058	0.0162605
ENSBTAG00000046003	H2AC19	Chr3	20747479	3:20816918:C:T	Chr3	20816918	T	C	0.395833	-0.268062	0.00288481
ENSBTAG00000032455	H2BC18	Chr3	20779442	3:20732604:T:G	Chr3	20732604	T	G	0.181818	-0.1623	0.00156549
ENSBTAG00000037565	NA	Chr3	20825102	3:20966765:GA:G	Chr3	20966765	GA	G	0.304924	0.29606	7.53385e-07
ENSBTAG00000053571	NA	Chr3	21218696	3:21158514:A:T	Chr3	21158514	T	A	0.261364	0.190639	3.62948e-10
ENSBTAG00000020060	TXNIP	Chr3	21383712	3:21528409:AC:A	Chr3	21528409	AC	A	0.363636	0.204439	0.000336526
ENSBTAG00000008372	PEX11B	Chr3	21454071	3:21454347:A:G	Chr3	21454347	A	G	0.437262	0.474241	4.79952e-10
ENSBTAG00000008373	ITGA10	Chr3	21460549	3:21454347:A:G	Chr3	21454347	A	G	0.437262	0.176351	0.00040949
ENSBTAG00000008131	RNF115	Chr3	21532900	3:21521832:G:T	Chr3	21521832	T	G	0.149621	-0.469639	3.56486e-09
ENSBTAG00000021637	POLR3C	Chr3	21532978	3:21530686:A:G	Chr3	21530686	G	A	0.253788	-0.443086	4.47773e-13
ENSBTAG00000053114	NA	Chr3	21677848	3:21725159:C:G	Chr3	21725159	C	G	0.030303	0.572873	5.50491e-07
ENSBTAG00000017051	ACP6	Chr3	21960527	3:21912743:C:A	Chr3	21912743	C	A	0.0643939	0.444014	0.0269647
ENSBTAG00000020831	CHD1L	Chr3	22446397	3:22419359:C:G	Chr3	22419359	G	C	0.299242	0.166786	9.34221e-10
ENSBTAG00000010841	FMO5	Chr3	22466920	3:22457652:T:TA	Chr3	22457652	TA	T	0.357955	0.276614	9.18245e-12
ENSBTAG00000014387	PRKAB2	Chr3	22528349	3:22829442:A:G	Chr3	22829442	G	A	0.0227273	-0.776911	0.0266539
ENSBTAG00000039719	PHGDH	Chr3	23596466	3:23567945:A:T	Chr3	23567945	T	A	0.219697	-0.171123	6.07696e-23
ENSBTAG00000019937	WDR3	Chr3	25286207	3:25286298:C:T	Chr3	25286298	C	T	0.147727	0.219027	2.82894e-07
ENSBTAG00000003586	MAN1A2	Chr3	25856341	3:25854728:C:G	Chr3	25854728	C	G	0.388258	-0.165988	2.59567e-06
ENSBTAG00000014466	VTCN1	Chr3	26012215	3:26037452:C:T	Chr3	26037452	C	T	0.308712	-0.27604	1.65912e-15
ENSBTAG00000001748	TRIM45	Chr3	26099796	3:26099697:G:C	Chr3	26099697	G	C	0.443182	0.420278	3.52364e-27
ENSBTAG00000015392	TTF2	Chr3	26179583	3:26094468:A:T	Chr3	26094468	A	T	0.0454545	0.400499	0.000592238
ENSBTAG00000018203	CD101	Chr3	26239599	3:26237617:C:T	Chr3	26237617	C	T	0.333333	-0.100459	1.63917e-05
ENSBTAG00000008022	PTGFRN	Chr3	26331248	3:26188329:AT:A	Chr3	26188329	AT	A	0.369318	0.0730487	6.53357e-06
ENSBTAG00000040131	CD58	Chr3	26709590	3:26747887:A:C	Chr3	26747887	A	C	0.335227	0.267358	2.50096e-06
ENSBTAG00000051199	NA	Chr3	27311368	3:27547573:A:G	Chr3	27547573	A	G	0.344697	0.241926	3.10825e-05
ENSBTAG00000000664	SLC22A15	Chr3	27363147	3:27547573:A:G	Chr3	27547573	A	G	0.344697	0.187697	3.50032e-11
ENSBTAG00000046797	NRAS	Chr3	28614966	3:29112590:CA:C	Chr3	29112590	CA	C	0.170455	-0.102825	0.0174099
ENSBTAG00000012194	DENND2C	Chr3	28661324	3:28710353:G:A	Chr3	28710353	G	A	0.155303	-0.239042	0.00145322
ENSBTAG00000016705	BCAS2	Chr3	28755535	3:27966306:A:AC	Chr3	27966306	A	AC	0.106061	-0.269148	0.000623167
ENSBTAG00000011327	OLFML3	Chr3	29394608	3:29382616:T:C	Chr3	29382616	C	T	0.378788	0.126498	0.00111096
ENSBTAG00000003614	AP4B1	Chr3	29479665	3:29483593:A:C	Chr3	29483593	A	C	0.257576	-0.248957	4.548e-05
ENSBTAG00000019617	PTPN22	Chr3	29519989	3:29545579:G:A	Chr3	29545579	G	A	0.202652	0.202377	0.00892398
ENSBTAG00000031940	RSBN1	Chr3	29579107	3:29604366:C:T	Chr3	29604366	C	T	0.375	0.198054	0.000632483
ENSBTAG00000019615	PHTF1	Chr3	29624991	3:29273786:G:A	Chr3	29273786	G	A	0.471591	-0.180898	1.60539e-06
ENSBTAG00000019611	MAGI3	Chr3	29962037	3:29265974:A:G	Chr3	29265974	A	G	0.401515	-0.239649	0.00854623
ENSBTAG00000008525	LRIG2	Chr3	30272272	3:30218948:G:C	Chr3	30218948	G	C	0.462121	0.123697	0.00176146
ENSBTAG00000015107	SLC16A1	Chr3	30382286	3:30425062:A:G	Chr3	30425062	A	G	0.217803	0.173719	0.000243576
ENSBTAG00000014297	MOV10	Chr3	30652245	3:30817624:C:T	Chr3	30817624	C	T	0.155303	0.152566	0.0112742
ENSBTAG00000021602	CTTNBP2NL	Chr3	30885081	3:30890718:G:A	Chr3	30890718	G	A	0.107955	0.345055	2.01307e-23
ENSBTAG00000018717	DDX20	Chr3	31550254	3:31771721:G:A	Chr3	31771721	G	A	0.375	0.1855	0.0064547
ENSBTAG00000050904	RAP1A	Chr3	31676077	3:32629827:T:C	Chr3	32629827	C	T	0.443182	-0.117367	0.0127777
ENSBTAG00000039738	TMIGD3	Chr3	31745650	3:30961395:A:G	Chr3	30961395	A	G	0.183712	-0.226365	0.000220374
ENSBTAG00000052822	C3H1orf162	Chr3	31836548	3:31836283:G:A	Chr3	31836283	G	A	0.24053	-0.231507	1.79024e-05
ENSBTAG00000006441	ATP5PB	Chr3	31863330	3:31853536:A:AT	Chr3	31853536	A	AT	0.24053	-0.149257	3.68974e-09
ENSBTAG00000014102	WDR77	Chr3	31863582	3:32773947:G:T	Chr3	32773947	G	T	0.0909091	0.256978	0.0246522
ENSBTAG00000013578	CHI3L2	Chr3	32192735	3:32408921:CT:C	Chr3	32408921	C	CT	0.378788	0.347022	1.65724e-09
ENSBTAG00000020172	DENND2D	Chr3	32204154	3:31951714:A:G	Chr3	31951714	A	G	0.217803	0.192097	0.00298546
ENSBTAG00000020169	CEPT1	Chr3	32272255	3:32277938:T:G	Chr3	32277938	T	G	0.13447	-0.184658	3.08277e-05
ENSBTAG00000009888	DRAM2	Chr3	32272398	3:31917538:A:T	Chr3	31917538	T	A	0.354167	0.114713	5.03548e-06
ENSBTAG00000012659	LRIF1	Chr3	32408227	3:32671063:G:C	Chr3	32671063	G	C	0.270833	-0.114954	1.97953e-05
ENSBTAG00000053209	NA	Chr3	32472098	3:32298606:C:G	Chr3	32298606	C	G	0.293561	0.30465	5.52316e-10
ENSBTAG00000042091	U6	Chr3	32485129	3:32323060:A:T	Chr3	32323060	A	T	0.314394	0.278366	0.0117216
ENSBTAG00000006466	CD53	Chr3	32533031	3:32532691:A:G	Chr3	32532691	G	A	0.367424	0.291192	8.48158e-09
ENSBTAG00000047879	KCNA3	Chr3	32745302	3:32156585:T:C	Chr3	32156585	T	C	0.1875	0.212434	4.89057e-07
ENSBTAG00000001981	SLC6A17	Chr3	33281966	3:33682692:A:G	Chr3	33682692	A	G	0.185606	-0.248754	1.27989e-05
ENSBTAG00000020964	STRIP1	Chr3	33393926	3:33386509:G:T	Chr3	33386509	T	G	0.219697	0.23525	9.56797e-05
ENSBTAG00000000283	CSF1	Chr3	33509479	3:33535111:C:T	Chr3	33535111	C	T	0.486742	-0.268368	2.36615e-08
ENSBTAG00000001842	GSTM3	Chr3	33652467	3:33663421:G:T	Chr3	33663421	G	T	0.376426	0.247759	4.09404e-20
ENSBTAG00000017765	GSTM1	Chr3	33720169	3:33275297:GA:G	Chr3	33275297	GA	G	0.393939	0.250432	0.0109497
ENSBTAG00000013018	AMPD2	Chr3	33830235	3:34009897:T:C	Chr3	34009897	T	C	0.193182	0.365535	3.1115e-05
ENSBTAG00000013016	GNAI3	Chr3	33899237	3:33004370:GT:G	Chr3	33004370	G	GT	0.337121	-0.111388	0.00373902
ENSBTAG00000014083	AMIGO1	Chr3	33940233	3:34046768:A:C	Chr3	34046768	C	A	0.225379	0.203187	0.000404108
ENSBTAG00000016643	CYB561D1	Chr3	33954930	3:33818127:C:T	Chr3	33818127	C	T	0.225379	-0.104508	0.02385
ENSBTAG00000020641	PSMA5	Chr3	34012639	3:33938327:G:C	Chr3	33938327	G	C	0.145833	0.120149	0.0187548
ENSBTAG00000008849	SORT1	Chr3	34036272	3:34102329:TA:T	Chr3	34102329	T	TA	0.289773	0.274557	1.8116e-11
ENSBTAG00000012962	SARS1	Chr3	34190011	3:34119163:A:G	Chr3	34119163	G	A	0.170455	-0.150959	1.52494e-05
ENSBTAG00000001136	ELAPOR1	Chr3	34215659	3:34444049:C:T	Chr3	34444049	C	T	0.0700758	-0.518478	0.00277305
ENSBTAG00000051851	NA	Chr3	34239641	3:34274095:T:G	Chr3	34274095	G	T	0.414773	0.170707	3.95281e-10
ENSBTAG00000045530	SCARNA2	Chr3	34281597	3:33867237:A:G	Chr3	33867237	A	G	0.0681818	-0.128972	0.00465024
ENSBTAG00000038979	TMEM167B	Chr3	34291820	3:34702867:G:A	Chr3	34702867	G	A	0.32197	0.131373	0.0210221
ENSBTAG00000008467	HENMT1	Chr3	34702130	3:35468145:C:T	Chr3	35468145	C	T	0.318182	-0.324484	0.026593
ENSBTAG00000005439	FAM102B	Chr3	34805116	3:34754441:T:TTACTTG	Chr3	34754441	T	TTACTTG	0.272727	-0.458249	2.70733e-21
ENSBTAG00000003752	SLC25A24	Chr3	35038388	3:35073561:G:A	Chr3	35073561	G	A	0.0909091	0.139471	1.36953e-05
ENSBTAG00000039951	PRMT6	Chr3	36312871	3:36330012:T:TTTG	Chr3	36330012	T	TTTG	0.270833	0.170696	7.2594e-08
ENSBTAG00000019091	RNPC3	Chr3	39883179	3:40225635:CT:C	Chr3	40225635	C	CT	0.492424	-0.0698899	0.0272491
ENSBTAG00000005990	S1PR1	Chr3	42039822	3:42610848:T:C	Chr3	42610848	T	C	0.329545	-0.226665	0.000256546
ENSBTAG00000019029	DPH5	Chr3	42259116	3:42375376:TAATA:T	Chr3	42375376	TAATA	T	0.157197	-0.150288	1.25218e-07
ENSBTAG00000019027	SLC30A7	Chr3	42410097	3:42150807:G:A	Chr3	42150807	G	A	0.460227	0.122698	0.00138723
ENSBTAG00000019026	EXTL2	Chr3	42410255	3:42373574:T:C	Chr3	42373574	C	T	0.3125	0.397222	4.17463e-27
ENSBTAG00000007773	VCAM1	Chr3	42576599	3:41994491:G:A	Chr3	41994491	A	G	0.399621	0.458627	9.24461e-07
ENSBTAG00000037539	NA	Chr3	42616930	3:42614824:A:G	Chr3	42614824	A	G	0.200758	0.340054	8.32904e-21
ENSBTAG00000006321	RTCA	Chr3	43034731	3:43001222:A:C	Chr3	43001222	A	C	0.469582	0.27981	4.58642e-13
ENSBTAG00000006320	DBT	Chr3	43039360	3:43040926:T:C	Chr3	43040926	C	T	0.339015	0.162049	5.7728e-26
ENSBTAG00000015781	TRMT13	Chr3	43140707	3:43244466:A:G	Chr3	43244466	A	G	0.219697	-0.179532	1.78494e-07
ENSBTAG00000015776	MFSD14A	Chr3	43236013	3:43560380:G:A	Chr3	43560380	A	G	0.113636	0.181082	7.32618e-10
ENSBTAG00000006491	AGL	Chr3	43432848	3:43360941:A:G	Chr3	43360941	A	G	0.369318	0.221881	6.11789e-09
ENSBTAG00000004591	PLPPR5	Chr3	44218428	3:44209046:C:T	Chr3	44209046	T	C	0.229167	0.248836	5.63399e-14
ENSBTAG00000031461	SNX7	Chr3	44620479	3:44653990:C:T	Chr3	44653990	C	T	0.348485	-0.385025	1.16053e-15
ENSBTAG00000031358	DPYD	Chr3	45408338	3:45891068:A:G	Chr3	45891068	A	G	0.431818	-0.0928703	3.90517e-11
ENSBTAG00000008809	PTBP2	Chr3	46739928	3:46766253:T:C	Chr3	46766253	C	T	0.492424	0.218475	6.80875e-15
ENSBTAG00000021537	RWDD3	Chr3	48252404	3:48256854:T:C	Chr3	48256854	C	T	0.143939	-0.478263	8.79324e-06
ENSBTAG00000044125	TLCD4	Chr3	48334802	3:48412223:T:C	Chr3	48412223	T	C	0.32197	0.268747	0.0178511
ENSBTAG00000004422	ALG14	Chr3	48405844	3:48386017:C:T	Chr3	48386017	T	C	0.418561	0.40464	3.87683e-20
ENSBTAG00000020345	CNN3	Chr3	48568966	3:48507701:G:A	Chr3	48507701	A	G	0.361742	-0.327335	5.32837e-05
ENSBTAG00000009698	ABCD3	Chr3	49070167	3:48633044:C:G	Chr3	48633044	C	G	0.166667	-0.185685	0.00952384
ENSBTAG00000004190	ARHGAP29	Chr3	49238270	3:49165990:G:A	Chr3	49165990	A	G	0.257576	-0.150425	6.18395e-07
ENSBTAG00000047679	DNTTIP2	Chr3	49610657	3:49683048:T:C	Chr3	49683048	C	T	0.200758	0.209298	0.000676027
ENSBTAG00000003245	BCAR3	Chr3	49691046	3:49742643:G:A	Chr3	49742643	A	G	0.265152	-0.442977	8.87009e-10
ENSBTAG00000020180	TMED5	Chr3	50290373	3:51035399:C:T	Chr3	51035399	C	T	0.204545	-0.0382918	8.23675e-08
ENSBTAG00000001393	MTF2	Chr3	50402638	3:50402498:T:C	Chr3	50402498	C	T	0.494318	-0.259296	1.94748e-05
ENSBTAG00000002028	DIPK1A	Chr3	50499734	3:50429138:T:C	Chr3	50429138	T	C	0.337121	-0.149029	3.85214e-09
ENSBTAG00000002026	RPL5	Chr3	50639054	3:50598857:C:G	Chr3	50598857	C	G	0.0359848	-0.251495	0.00299561
ENSBTAG00000011363	EVI5	Chr3	50677522	3:50511036:T:TACTTA	Chr3	50511036	T	TACTTA	0.367424	0.124014	4.86468e-07
ENSBTAG00000018737	GLMN	Chr3	51122897	3:51112142:C:A	Chr3	51112142	C	A	0.107955	-0.206321	1.26108e-08
ENSBTAG00000006167	BTBD8	Chr3	51316954	3:51341170:G:GA	Chr3	51341170	G	GA	0.433712	0.0850298	9.77752e-06
ENSBTAG00000024269	TGFBR3	Chr3	51501753	3:51869392:C:A	Chr3	51869392	C	A	0.231061	0.328153	7.0327e-06
ENSBTAG00000011200	ZNF644	Chr3	52252199	3:51783531:G:A	Chr3	51783531	A	G	0.405303	0.121996	1.69945e-08
ENSBTAG00000020958	LRRC8D	Chr3	53443924	3:52929762:C:T	Chr3	52929762	C	T	0.162879	0.169879	5.47882e-05
ENSBTAG00000020214	LRRC8B	Chr3	53713047	3:53757407:G:T	Chr3	53757407	G	T	0.0852273	-0.379203	5.89513e-05
ENSBTAG00000038625	NA	Chr3	53862078	3:54008548:C:T	Chr3	54008548	C	T	0.227273	0.118146	4.37588e-14
ENSBTAG00000048959	NA	Chr3	53907633	3:53889692:T:C	Chr3	53889692	C	T	0.113636	0.237229	2.98357e-08
ENSBTAG00000015060	GBP5	Chr3	54094948	3:54097487:G:A	Chr3	54097487	G	A	0.113636	0.422525	1.1552e-18
ENSBTAG00000001143	NA	Chr3	54165067	3:53535501:T:A	Chr3	53535501	T	A	0.399621	0.10756	7.80639e-09
ENSBTAG00000037634	NA	Chr3	54187434	3:54179882:T:TAA	Chr3	54179882	T	TAA	0.164773	-0.524032	3.8585e-37
ENSBTAG00000038938	GBP2	Chr3	54409370	3:54104414:A:G	Chr3	54104414	A	G	0.113636	-0.554718	1.4361e-12
ENSBTAG00000014529	GBP4	Chr3	54451266	3:55313238:T:A	Chr3	55313238	T	A	0.405303	0.219758	3.00722e-08
ENSBTAG00000031186	GBP6	Chr3	54583804	3:54528817:A:AACAATGTTGTGT	Chr3	54528817	AACAATGTTGTGT	A	0.414773	5.17078e-07	4.23762e-24
ENSBTAG00000024272	NA	Chr3	54620771	3:54716011:AATT:A	Chr3	54716011	A	AATT	0.399621	0.110914	2.76454e-18
ENSBTAG00000038233	NA	Chr3	54715933	3:54864115:AT:A	Chr3	54864115	AT	A	0.443182	0.195525	7.81869e-11
ENSBTAG00000002416	NA	Chr3	54790813	3:54739868:TG:T	Chr3	54739868	TG	T	0.441288	0.163446	6.00328e-22
ENSBTAG00000017670	NA	Chr3	54901261	3:54988998:A:G	Chr3	54988998	A	G	0.452652	-0.255351	1.14082e-14
ENSBTAG00000000505	KYAT3	Chr3	54928687	3:54765417:G:C	Chr3	54765417	C	G	0.380682	2.49069e-07	4.1714e-10
ENSBTAG00000000504	GTF2B	Chr3	55014450	3:54891372:T:G	Chr3	54891372	T	G	0.443182	-0.169773	0.00015293
ENSBTAG00000021900	PKN2	Chr3	55200622	3:55169790:G:T	Chr3	55169790	G	T	0.410985	0.151686	5.26898e-13
ENSBTAG00000000305	LMO4	Chr3	56715731	3:56657214:T:C	Chr3	56657214	C	T	0.399621	0.18971	0.00236411
ENSBTAG00000017595	NA	Chr3	57144590	3:57929634:C:A	Chr3	57929634	C	A	0.183712	-0.176932	0.000159452
ENSBTAG00000052268	SELENOF	Chr3	57145265	3:57225847:C:T	Chr3	57225847	C	T	0.179924	0.0798098	1.62945e-06
ENSBTAG00000031171	SH3GLB1	Chr3	57314453	3:57114399:G:A	Chr3	57114399	G	A	0.267045	-5.751e-08	0.00163101
ENSBTAG00000012907	ODF2L	Chr3	57674211	3:57595950:C:CA	Chr3	57595950	C	CA	0.0265152	-0.576385	0.00112255
ENSBTAG00000013851	BCL10	Chr3	58819706	3:58786882:A:C	Chr3	58786882	C	A	0.454545	2.26409e-08	1.00564e-10
ENSBTAG00000046773	MCOLN2	Chr3	59112072	3:59147326:T:C	Chr3	59147326	T	C	0.138258	-0.283104	5.98448e-07
ENSBTAG00000003791	LPAR3	Chr3	59185582	3:59237436:T:TG	Chr3	59237436	T	TG	0.151515	-0.296694	4.23659e-05
ENSBTAG00000008122	GNG5	Chr3	59591886	3:59524358:C:A	Chr3	59524358	C	A	0.261364	-0.170072	0.0199729
ENSBTAG00000008118	RPF1	Chr3	59617167	3:59599498:G:T	Chr3	59599498	G	T	0.376894	-0.203505	4.94966e-19
ENSBTAG00000053482	SAMD13	Chr3	59819902	3:59781814:C:A	Chr3	59781814	C	A	0.251894	0.348192	0.000448836
ENSBTAG00000011953	PRKACB	Chr3	60026329	3:59866269:G:C	Chr3	59866269	G	C	0.0416667	-0.200763	0.0245682
ENSBTAG00000003322	TTLL7	Chr3	60110694	3:60112494:A:G	Chr3	60112494	A	G	0.49053	-0.216097	7.7129e-12
ENSBTAG00000034349	IFI44	Chr3	66043630	3:66079169:G:T	Chr3	66079169	T	G	0.0340909	-0.860668	6.88749e-07
ENSBTAG00000030932	IFI44L	Chr3	66071372	3:66064556:G:T	Chr3	66064556	T	G	0.340909	-0.223177	8.88042e-11
ENSBTAG00000008921	NEXN	Chr3	66798302	3:66879885:G:GT	Chr3	66879885	GT	G	0.469582	-0.342482	6.82244e-05
ENSBTAG00000031044	MIGA1	Chr3	66883012	3:66834658:C:T	Chr3	66834658	C	T	0.452652	-0.223362	6.20092e-16
ENSBTAG00000020761	USP33	Chr3	66900557	3:66918032:C:T	Chr3	66918032	T	C	0.278409	0.10145	2.12353e-10
ENSBTAG00000017419	ZZZ3	Chr3	66975444	3:66976776:A:C	Chr3	66976776	C	A	0.320076	-0.0847967	0.0262659
ENSBTAG00000031012	PIGK	Chr3	67430366	3:67429615:A:T	Chr3	67429615	A	T	0.149621	-0.274475	1.06705e-19
ENSBTAG00000018448	MSH4	Chr3	69055498	3:69062934:A:G	Chr3	69062934	G	A	0.172348	0.378264	8.08671e-08
ENSBTAG00000024240	ACADM	Chr3	69124464	3:68845477:T:A	Chr3	68845477	A	T	0.494318	-0.140303	0.00878103
ENSBTAG00000003162	CRYZ	Chr3	69989883	3:69992082:T:G	Chr3	69992082	T	G	0.176136	0.225012	7.80409e-06
ENSBTAG00000005196	TYW3	Chr3	69990582	3:70005214:T:G	Chr3	70005214	T	G	0.17803	-0.49496	7.91505e-05
ENSBTAG00000014791	CTH	Chr3	74793722	3:74707597:T:A	Chr3	74707597	T	A	0.484848	-0.529546	7.04738e-09
ENSBTAG00000008243	LRRC40	Chr3	74977581	3:75017610:T:TTA	Chr3	75017610	TTA	T	0.125	0.183321	9.31442e-07
ENSBTAG00000001343	DEPDC1	Chr3	76768175	3:77531559:TC:T	Chr3	77531559	TC	T	0.0359848	0.797579	0.0115984
ENSBTAG00000052364	NA	Chr3	77037985	3:77560990:C:T	Chr3	77560990	T	C	0.359848	-0.14155	0.0104153
ENSBTAG00000012182	DIRAS3	Chr3	77246900	3:77592231:A:G	Chr3	77592231	A	G	0.136364	0.425167	0.0205782
ENSBTAG00000054533	GNG12	Chr3	77489269	3:77493241:G:A	Chr3	77493241	A	G	0.236742	0.216541	3.0728e-05
ENSBTAG00000013860	GADD45A	Chr3	77651872	3:77652002:A:AG	Chr3	77652002	AG	A	0.496198	0.15702	0.000636058
ENSBTAG00000009455	IL12RB2	Chr3	78035575	3:78014184:G:A	Chr3	78014184	G	A	0.143939	-0.25959	6.08054e-12
ENSBTAG00000008636	PDE4B	Chr3	79406648	3:78919990:A:C	Chr3	78919990	C	A	0.484848	0.0971842	0.00961117
ENSBTAG00000005909	LEPROT	Chr3	79925489	3:79926825:A:G	Chr3	79926825	A	G	0.433712	-0.238959	1.18278e-06
ENSBTAG00000030749	DNAJC6	Chr3	80107385	3:79873992:G:A	Chr3	79873992	G	A	0.128788	0.674195	1.28551e-06
ENSBTAG00000030674	AK4	Chr3	80251376	3:80848943:A:T	Chr3	80848943	A	T	0.0833333	0.373968	0.0123717
ENSBTAG00000003147	JAK1	Chr3	80444567	3:80444552:T:C	Chr3	80444552	C	T	0.411197	-0.0767803	1.91114e-07
ENSBTAG00000016455	CACHD1	Chr3	81022967	3:80974547:A:ACGCCAG	Chr3	80974547	A	ACGCCAG	0.354167	-9.92645e-08	1.01964e-13
ENSBTAG00000019011	PGM1	Chr3	81978206	3:82165745:T:C	Chr3	82165745	T	C	0.420455	0.208273	9.68626e-10
ENSBTAG00000030710	ITGB3BP	Chr3	82052301	3:82104343:C:G	Chr3	82104343	C	G	0.0265152	0.468554	0.000115552
ENSBTAG00000030706	ALG6	Chr3	82208238	3:82756417:AAAC:A	Chr3	82756417	AAAC	A	0.164773	0.166187	0.00574957
ENSBTAG00000010124	ATG4C	Chr3	82852335	3:82965870:G:A	Chr3	82965870	G	A	0.498106	0.0812878	0.011172
ENSBTAG00000019877	DOCK7	Chr3	82924989	3:82970542:T:TA	Chr3	82970542	T	TA	0.410985	0.0931038	8.38037e-11
ENSBTAG00000020451	USP1	Chr3	83129455	3:82970707:A:AT	Chr3	82970707	AT	A	0.49053	0.0941999	8.20991e-07
ENSBTAG00000021975	PATJ	Chr3	83936160	3:83985017:C:T	Chr3	83985017	T	C	0.32197	-0.0762225	0.0151111
ENSBTAG00000017161	TM2D1	Chr3	83947668	3:84029408:T:C	Chr3	84029408	C	T	0.49053	0.185908	0.000893422
ENSBTAG00000000074	NFIA	Chr3	84620790	3:83640425:A:G	Chr3	83640425	A	G	0.221591	-0.21953	0.00911703
ENSBTAG00000051542	NA	Chr3	85836233	3:85838713:G:A	Chr3	85838713	G	A	0.0492424	-0.702448	6.26075e-17
ENSBTAG00000051904	NA	Chr3	85911870	3:85493693:T:C	Chr3	85493693	T	C	0.454545	0.314124	0.00835855
ENSBTAG00000053766	NA	Chr3	85970058	3:85983072:T:G	Chr3	85983072	T	G	0.0984849	0.39257	3.43229e-15
ENSBTAG00000051030	NA	Chr3	86053819	3:86088426:G:C	Chr3	86088426	G	C	0.140152	-0.407452	2.85453e-21
ENSBTAG00000030671	HOOK1	Chr3	86163267	3:86162877:A:G	Chr3	86162877	A	G	0.106061	-0.379919	3.7867e-11
ENSBTAG00000030669	FGGY	Chr3	86718004	3:86665386:T:C	Chr3	86665386	T	C	0.344697	0.181154	1.98528e-06
ENSBTAG00000004037	JUN	Chr3	87265963	3:87107264:G:A	Chr3	87107264	G	A	0.356061	0.166914	0.00689736
ENSBTAG00000017326	OMA1	Chr3	87479246	3:87460241:G:A	Chr3	87460241	G	A	0.0833333	-0.885821	7.70863e-13
ENSBTAG00000011640	PLPP3	Chr3	89608084	3:89773296:C:G	Chr3	89773296	G	C	0.465909	0.345548	1.00105e-19
ENSBTAG00000016990	USP24	Chr3	91131529	3:91205511:G:C	Chr3	91205511	G	C	0.162879	-0.182648	3.90242e-05
ENSBTAG00000004688	DHCR24	Chr3	91411767	3:91544348:C:T	Chr3	91544348	C	T	0.299242	0.229088	5.19274e-12
ENSBTAG00000015931	TTC4	Chr3	91564769	3:91533700:T:A	Chr3	91533700	T	A	0.410985	0.278661	0.000131264
ENSBTAG00000010715	MRPL37	Chr3	92033861	3:92055556:A:G	Chr3	92055556	G	A	0.301136	-0.170938	0.000170163
ENSBTAG00000020037	CYB5RL	Chr3	92033901	3:92055556:A:G	Chr3	92055556	G	A	0.301136	0.505731	1.78279e-11
ENSBTAG00000019198	LRRC42	Chr3	92262728	3:92249575:T:C	Chr3	92249575	T	C	0.496212	0.273717	7.17664e-10
ENSBTAG00000014649	CPT2	Chr3	93057118	3:93057196:A:C	Chr3	93057196	A	C	0.382576	0.106722	2.7921e-15
ENSBTAG00000054697	NA	Chr3	93249188	3:93217612:G:A	Chr3	93217612	G	A	0.42803	-0.35591	2.90398e-17
ENSBTAG00000003746	SCP2	Chr3	93393567	3:93245379:G:A	Chr3	93245379	G	A	0.304924	-0.144553	7.08412e-05
ENSBTAG00000018281	GPX7	Chr3	93749741	3:93726915:TGCGCGCC:T	Chr3	93726915	T	TGCGCGCC	0.479167	0.146803	1.15666e-06
ENSBTAG00000015896	CC2D1B	Chr3	93998823	3:94061806:T:TA	Chr3	94061806	T	TA	0.246212	-4.67728e-07	7.33952e-17
ENSBTAG00000014289	ZFYVE9	Chr3	94201518	3:94185062:G:C	Chr3	94185062	G	C	0.268939	0.226682	4.53986e-09
ENSBTAG00000011025	BTF3L4	Chr3	94278300	3:94247768:CT:C	Chr3	94247768	C	CT	0.465909	0.245769	7.90364e-06
ENSBTAG00000021170	OSBPL9	Chr3	94702613	3:94749642:A:AC	Chr3	94749642	A	AC	0.138258	-0.196317	0.0176861
ENSBTAG00000005542	EPS15	Chr3	94802847	3:94875456:G:GTA	Chr3	94875456	G	GTA	0.0530303	-0.293382	0.00057812
ENSBTAG00000054545	RNF11	Chr3	95059039	3:95849910:G:A	Chr3	95849910	A	G	0.443182	0.178217	0.000925268
ENSBTAG00000011059	CDKN2C	Chr3	95342769	3:94913924:C:CT	Chr3	94913924	C	CT	0.420455	-0.13917	0.00450517
ENSBTAG00000012722	NA	Chr3	97586688	3:98129925:C:T	Chr3	98129925	C	T	0.492424	0.355132	0.00485419
ENSBTAG00000003128	SPATA6	Chr3	97776436	3:97731014:G:A	Chr3	97731014	A	G	0.454545	-0.127324	1.27551e-08
ENSBTAG00000051070	NA	Chr3	98834630	3:99039331:GGGAAACAGT:G	Chr3	99039331	GGGAAACAGT	G	0.465909	-0.304714	1.05398e-07
ENSBTAG00000005029	TAL1	Chr3	99005835	3:98292069:G:A	Chr3	98292069	G	A	0.185606	0.16974	0.00933049
ENSBTAG00000002555	PDZK1IP1	Chr3	99025650	3:99095123:C:T	Chr3	99095123	C	T	0.333333	-0.209354	1.77275e-06
ENSBTAG00000000097	EFCAB14	Chr3	99421570	3:99421570:T:G	Chr3	99421570	T	G	0.0568182	-0.336042	2.02046e-06
ENSBTAG00000000094	ATPAF1	Chr3	99466614	3:98878938:C:T	Chr3	98878938	C	T	0.0549242	1.11938	0.00364266
ENSBTAG00000023551	MOB3C	Chr3	99514447	3:99502159:CCAGA:C	Chr3	99502159	CCAGA	C	0.0852273	-0.662401	8.53076e-09
ENSBTAG00000015891	NSUN4	Chr3	99773411	3:99665976:A:G	Chr3	99665976	G	A	0.331439	0.223563	0.00647974
ENSBTAG00000045664	LRRC41	Chr3	99799406	3:99819242:A:G	Chr3	99819242	G	A	0.424242	-0.168502	0.000242642
ENSBTAG00000013322	POMGNT1	Chr3	99869872	3:99805386:A:G	Chr3	99805386	A	G	0.318182	-0.302086	6.97736e-13
ENSBTAG00000024144	LURAP1	Chr3	99881509	3:99958304:GA:G	Chr3	99958304	G	GA	0.388258	-0.356998	1.39688e-10
ENSBTAG00000013320	TSPAN1	Chr3	99901044	3:99701474:A:G	Chr3	99701474	A	G	0.0473485	0.763729	7.17239e-05
ENSBTAG00000002979	PIK3R3	Chr3	99963095	3:100001270:T:G	Chr3	100001270	T	G	0.223485	0.185981	0.0106149
ENSBTAG00000020444	MAST2	Chr3	100278380	3:100068357:CT:C	Chr3	100068357	CT	C	0.147727	0.358868	1.31959e-06
ENSBTAG00000016377	IPP	Chr3	100332769	3:100332894:C:G	Chr3	100332894	C	G	0.104167	-0.349316	9.96747e-07
ENSBTAG00000052979	TMEM69	Chr3	100378679	3:101192681:C:G	Chr3	101192681	C	G	0.032197	0.15886	0.018569
ENSBTAG00000008810	GPBP1L1	Chr3	100418896	3:100382407:C:T	Chr3	100382407	C	T	0.0397727	-0.454368	0.00975139
ENSBTAG00000000497	AKR1A1	Chr3	100517388	3:100524096:A:G	Chr3	100524096	A	G	0.274621	2.53918e-07	7.2606e-23
ENSBTAG00000017027	MMACHC	Chr3	100571190	3:101415920:ACCG:A	Chr3	101415920	ACCG	A	0.379771	-0.329439	0.0145304
ENSBTAG00000011243	TOE1	Chr3	100731168	3:100686195:C:A	Chr3	100686195	C	A	0.0587121	-0.339892	2.2809e-05
ENSBTAG00000012648	ZSWIM5	Chr3	100852667	3:101484139:G:A	Chr3	101484139	G	A	0.0227273	0.430823	0.000109866
ENSBTAG00000019013	HECTD3	Chr3	101040410	3:100305266:C:T	Chr3	100305266	C	T	0.261364	0.149957	0.00598735
ENSBTAG00000015559	ERI3	Chr3	101700925	3:101712271:CACA:C	Chr3	101712271	CACA	C	0.162879	-0.466395	2.21159e-08
ENSBTAG00000008690	SLC6A9	Chr3	102033427	3:102019106:C:G	Chr3	102019106	C	G	0.102273	-0.237401	0.000211288
ENSBTAG00000011879	B4GALT2	Chr3	102079762	3:102460273:G:A	Chr3	102460273	G	A	0.0435606	0.574519	0.00223251
ENSBTAG00000018889	ATP6V0B	Chr3	102084006	3:102048030:G:A	Chr3	102048030	G	A	0.0700758	-0.23996	8.23373e-09
ENSBTAG00000018887	IPO13	Chr3	102111545	3:102066567:C:T	Chr3	102066567	T	C	0.0246212	0.815251	9.63546e-14
ENSBTAG00000017656	ST3GAL3	Chr3	102311428	3:102199186:A:G	Chr3	102199186	G	A	0.441288	-0.270171	4.36613e-10
ENSBTAG00000016899	ELOVL1	Chr3	102629292	3:102510922:G:GA	Chr3	102510922	GA	G	0.44697	-0.174618	1.89512e-08
ENSBTAG00000003777	TIE1	Chr3	102714614	3:102708422:A:G	Chr3	102708422	A	G	0.136364	0.59255	7.48092e-18
ENSBTAG00000021544	EBNA1BP2	Chr3	102838620	3:102839294:G:C	Chr3	102839294	C	G	0.295455	-0.156576	9.29923e-08
ENSBTAG00000017388	SVBP	Chr3	103432471	3:103431549:A:G	Chr3	103431549	G	A	0.38447	-0.384729	9.13772e-16
ENSBTAG00000017382	P3H1	Chr3	103472228	3:103475906:G:A	Chr3	103475906	G	A	0.333333	0.21616	0.000226405
ENSBTAG00000004585	CCDC30	Chr3	103700789	3:104382351:G:A	Chr3	104382351	G	A	0.0246212	0.476018	0.00100674
ENSBTAG00000001629	SCMH1	Chr3	104965054	3:105099221:C:T	Chr3	105099221	T	C	0.407197	0.313396	1.90701e-06
ENSBTAG00000001626	CTPS1	Chr3	105280146	3:105235533:A:G	Chr3	105235533	G	A	0.414773	-0.21402	0.000304023
ENSBTAG00000015113	CITED4	Chr3	105348798	3:105342018:C:T	Chr3	105342018	T	C	0.431818	0.465992	2.29926e-08
ENSBTAG00000000533	ZNF684	Chr3	105622276	3:105625687:AT:A	Chr3	105625687	AT	A	0.299242	0.384393	4.58978e-11
ENSBTAG00000000532	EXO5	Chr3	105644310	3:106384430:A:G	Chr3	106384430	A	G	0.380682	0.214432	0.0236854
ENSBTAG00000021922	SMAP2	Chr3	105757346	3:105780681:C:T	Chr3	105780681	T	C	0.479167	0.11644	0.010804
ENSBTAG00000044178	ZMPSTE24	Chr3	105867157	3:105900186:G:C	Chr3	105900186	G	C	0.357955	0.290488	7.65443e-10
ENSBTAG00000019695	RLF	Chr3	105974325	3:105857136:AAG:A	Chr3	105857136	A	AAG	0.246212	-0.160989	1.0224e-07
ENSBTAG00000013367	PPT1	Chr3	106020189	3:106315446:T:C	Chr3	106315446	T	C	0.0454545	-0.125852	1.41022e-06
ENSBTAG00000044719	NA	Chr3	106035413	3:106086385:G:A	Chr3	106086385	A	G	0.471591	-0.275051	9.27828e-08
ENSBTAG00000013363	CAP1	Chr3	106066200	3:106439289:A:G	Chr3	106439289	A	G	0.0909091	0.327128	6.22569e-07
ENSBTAG00000054059	MYCL	Chr3	106185441	3:106259692:C:T	Chr3	106259692	T	C	0.320076	0.275676	4.84962e-12
ENSBTAG00000013832	TRIT1	Chr3	106204848	3:106210003:C:G	Chr3	106210003	C	G	0.416667	-0.151298	1.29845e-10
ENSBTAG00000047314	PPIE	Chr3	106344433	3:106342985:A:G	Chr3	106342985	A	G	0.164773	-0.43741	4.2154e-18
ENSBTAG00000021024	MACF1	Chr3	106927295	3:106786095:T:TATAAATATCAAAA	Chr3	106786095	T	TATAAATATCAAAA	0.435606	-0.141144	0.000912522
ENSBTAG00000004715	AKIRIN1	Chr3	106998848	3:107056170:T:G	Chr3	107056170	T	G	0.477273	-0.166856	5.83223e-12
ENSBTAG00000009368	RRAGC	Chr3	107121921	3:107170926:T:C	Chr3	107170926	T	C	0.498106	0.242506	0.00322063
ENSBTAG00000002306	UTP11	Chr3	107957939	3:107953099:A:G	Chr3	107953099	A	G	0.327652	0.319284	6.45981e-07
ENSBTAG00000007300	FHL3	Chr3	107959453	3:107953023:G:A	Chr3	107953023	G	A	0.325758	-0.157853	9.8205e-06
ENSBTAG00000007299	SF3A3	Chr3	107971021	3:107971417:G:C	Chr3	107971417	G	C	0.344697	0.269027	2.95491e-23
ENSBTAG00000024107	INPP5B	Chr3	108007866	3:108076366:G:A	Chr3	108076366	G	A	0.0568182	-0.272231	3.47962e-10
ENSBTAG00000006510	YRDC	Chr3	108109005	3:108107017:A:T	Chr3	108107017	A	T	0.170455	0.361549	0.00737596
ENSBTAG00000014326	CDCA8	Chr3	108213207	3:108153407:C:T	Chr3	108153407	T	C	0.301136	-0.152961	9.56183e-08
ENSBTAG00000003837	RSPO1	Chr3	108267192	3:108062403:C:A	Chr3	108062403	C	A	0.147727	0.894831	1.10628e-08
ENSBTAG00000010506	MEAF6	Chr3	108368075	3:108323016:T:C	Chr3	108323016	T	C	0.42803	0.154245	0.0197333
ENSBTAG00000054152	NA	Chr3	109409055	3:109406279:A:G	Chr3	109406279	G	A	0.337121	0.199052	3.22152e-07
ENSBTAG00000013334	CSF3R	Chr3	109418280	3:109412710:TC:T	Chr3	109412710	T	TC	0.433712	-0.0802289	0.00314572
ENSBTAG00000024097	MRPS15	Chr3	109431031	3:109408099:C:A	Chr3	109408099	C	A	0.231061	0.138489	4.5501e-14
ENSBTAG00000007994	OSCP1	Chr3	109442373	3:109441169:G:A	Chr3	109441169	G	A	0.454545	-0.238269	3.58631e-11
ENSBTAG00000024096	LSM10	Chr3	109482125	3:109610934:A:T	Chr3	109610934	A	T	0.278409	0.488645	9.46844e-07
ENSBTAG00000015969	STK40	Chr3	109490895	3:109528757:T:C	Chr3	109528757	T	C	0.30303	-0.0756083	0.0019771
ENSBTAG00000014358	EVA1B	Chr3	109535133	3:109533407:G:A	Chr3	109533407	G	A	0.49053	0.133914	1.04611e-05
ENSBTAG00000024095	THRAP3	Chr3	109625086	3:109613285:A:G	Chr3	109613285	A	G	0.409091	-0.145557	0.000709517
ENSBTAG00000030301	MAP7D1	Chr3	109671174	3:109683114:T:C	Chr3	109683114	T	C	0.488636	0.0732547	0.0157702
ENSBTAG00000015220	AGO4	Chr3	109977492	3:110021849:A:G	Chr3	110021849	G	A	0.138258	0.260747	3.50289e-06
ENSBTAG00000038292	C3H1orf216	Chr3	110065620	3:109648683:AG:A	Chr3	109648683	AG	A	0.0606061	0.523733	4.21154e-08
ENSBTAG00000016696	NCDN	Chr3	110210854	3:109344393:T:C	Chr3	109344393	C	T	0.49053	0.177069	0.000986968
ENSBTAG00000016694	KIAA0319L	Chr3	110214079	3:110107735:C:T	Chr3	110107735	C	T	0.149621	-0.520307	3.50515e-07
ENSBTAG00000021023	ZMYM4	Chr3	110491582	3:110491393:G:C	Chr3	110491393	G	C	0.0284091	-0.315339	0.000121636
ENSBTAG00000006555	ZMYM1	Chr3	110623103	3:110640246:G:C	Chr3	110640246	G	C	0.263258	0.137841	1.02609e-06
ENSBTAG00000021948	ZMYM6	Chr3	110648271	3:110992018:C:T	Chr3	110992018	C	T	0.339015	0.0620184	1.18237e-07
ENSBTAG00000024086	TMEM35B	Chr3	110694719	3:110701165:G:T	Chr3	110701165	G	T	0.195076	-0.654734	1.01519e-12
ENSBTAG00000014079	GIGYF2	Chr3	112454969	3:112454997:C:T	Chr3	112454997	T	C	0.339015	0.247931	3.17141e-07
ENSBTAG00000020173	INPP5D	Chr3	112794124	3:112907863:CG:C	Chr3	112907863	CG	C	0.0643939	-0.360561	2.11564e-08
ENSBTAG00000003928	ATG16L1	Chr3	112967755	3:112924525:C:T	Chr3	112924525	C	T	0.11553	0.113023	4.97489e-05
ENSBTAG00000044861	NA	Chr3	112988387	3:112988709:A:G	Chr3	112988709	A	G	0.25947	0.121321	5.71817e-05
ENSBTAG00000021480	SAG	Chr3	113023697	3:113099461:C:A	Chr3	113099461	C	A	0.162879	0.143669	0.000226338
ENSBTAG00000020616	DGKD	Chr3	113062331	3:113233342:G:A	Chr3	113233342	G	A	0.320076	-0.292295	2.70138e-14
ENSBTAG00000053153	NA	Chr3	114114883	3:114063363:C:G	Chr3	114063363	C	G	0.212121	0.304988	5.61332e-10
ENSBTAG00000013869	SH3BP4	Chr3	114535148	3:114647968:A:G	Chr3	114647968	G	A	0.431818	-0.17631	0.0191332
ENSBTAG00000016504	AGAP1	Chr3	115044732	3:114721336:G:A	Chr3	114721336	A	G	0.361742	0.270268	1.33453e-06
ENSBTAG00000018424	ACKR3	Chr3	116025263	3:115844763:C:T	Chr3	115844763	T	C	0.304924	0.365796	0.000210419
ENSBTAG00000030190	COL6A3	Chr3	116855219	3:116850446:C:CAT	Chr3	116850446	C	CAT	0.276515	0.423488	1.45464e-19
ENSBTAG00000017624	RAB17	Chr3	117043357	3:117047548:TCTCTGTTC:T	Chr3	117047548	T	TCTCTGTTC	0.221591	0.519721	3.25382e-19
ENSBTAG00000005354	LRRFIP1	Chr3	117074082	3:117708647:C:G	Chr3	117708647	C	G	0.125	0.112948	0.0238934
ENSBTAG00000026114	UBE2F	Chr3	117354168	3:118216854:T:C	Chr3	118216854	T	C	0.100379	-0.169444	0.00281106
ENSBTAG00000017826	SCLY	Chr3	117410454	3:118226356:G:C	Chr3	118226356	C	G	0.204633	-0.444237	2.51128e-08
ENSBTAG00000010164	ESPNL	Chr3	117441784	3:117442020:G:A	Chr3	117442020	G	A	0.0454545	-0.49312	4.28373e-10
ENSBTAG00000052151	NA	Chr3	117547512	3:117537571:G:A	Chr3	117537571	G	A	0.356061	-0.196344	7.5693e-07
ENSBTAG00000015973	TRAF3IP1	Chr3	117639172	3:117598415:A:C	Chr3	117598415	A	C	0.0871212	0.567334	8.93578e-14
ENSBTAG00000003279	NDUFA10	Chr3	118923959	3:118798937:T:C	Chr3	118798937	C	T	0.327652	-0.195273	0.000431433
ENSBTAG00000010910	COPS9	Chr3	119666681	3:118986473:G:A	Chr3	118986473	G	A	0.232955	0.573276	4.81708e-20
ENSBTAG00000015996	GPC1	Chr3	119863650	3:120036114:A:G	Chr3	120036114	G	A	0.265152	-0.347407	0.000171965
ENSBTAG00000049766	DUSP28	Chr3	119952859	3:120021595:A:G	Chr3	120021595	G	A	0.278409	0.416017	1.11549e-09
ENSBTAG00000007215	RNPEPL1	Chr3	119958671	3:119970946:G:GC	Chr3	119970946	G	GC	0.119318	-0.15388	0.00143797
ENSBTAG00000002809	CAPN10	Chr3	119973443	3:120142622:G:A	Chr3	120142622	G	A	0.155303	0.265625	7.87376e-05
ENSBTAG00000030193	GPR35	Chr3	120005504	3:119685533:T:C	Chr3	119685533	T	C	0.17803	-0.41831	3.04181e-10
ENSBTAG00000000784	MTERF4	Chr3	120335084	3:120708078:G:A	Chr3	120708078	A	G	0.272727	-0.410385	4.36706e-09
ENSBTAG00000000789	PPP1R7	Chr3	120373078	3:120376801:C:G	Chr3	120376801	C	G	0.403409	0.209632	8.24473e-05
ENSBTAG00000004315	HDLBP	Chr3	120482640	3:120479602:G:GTTCTT	Chr3	120479602	G	GTTCTT	0.149621	-0.202992	6.96064e-06
ENSBTAG00000002608	SEPTIN2	Chr3	120482708	3:120497389:C:T	Chr3	120497389	C	T	0.117424	-0.192301	8.08865e-11
ENSBTAG00000009676	STK25	Chr3	120622330	3:119982296:G:T	Chr3	119982296	G	T	0.0359848	-0.324989	0.00664996
ENSBTAG00000008711	BOK	Chr3	120646407	3:120698575:G:C	Chr3	120698575	G	C	0.337121	-0.295904	0.000116947
ENSBTAG00000009123	ING5	Chr3	120743886	3:120750554:G:A	Chr3	120750554	A	G	0.268939	-0.178984	0.0108449
ENSBTAG00000002847	D2HGDH	Chr3	120765584	3:120204131:T:C	Chr3	120204131	C	T	0.375	-0.194	0.0086475
ENSBTAG00000011543	PDCD1	Chr3	120848740	3:120965676:G:C	Chr3	120965676	G	C	0.175573	0.293702	0.00871409
ENSBTAG00000017086	GRB10	Chr4	5106066	4:5075926:G:GA	Chr4	5075926	G	GA	0.473485	-0.256408	2.73445e-09
ENSBTAG00000001500	FIGNL1	Chr4	5454470	4:5967542:G:C	Chr4	5967542	G	C	0.0416667	-0.814518	0.0271634
ENSBTAG00000014016	IKZF1	Chr4	5599101	4:5677437:T:C	Chr4	5677437	C	T	0.19697	-0.168472	9.43303e-05
ENSBTAG00000008428	UPP1	Chr4	7648114	4:7623872:G:A	Chr4	7623872	A	G	0.274621	-0.178677	4.03658e-07
ENSBTAG00000048664	CDK14	Chr4	7937944	4:8003446:G:A	Chr4	8003446	A	G	0.42803	0.0687733	0.0138076
ENSBTAG00000045617	MTERF1	Chr4	9254862	4:9237585:C:T	Chr4	9237585	T	C	0.126894	0.334276	1.25877e-15
ENSBTAG00000007442	AKAP9	Chr4	9333129	4:8913690:GCAAAAAAAA:G	Chr4	8913690	GCAAAAAAAA	G	0.0591603	0.25206	1.57133e-08
ENSBTAG00000034936	ANKIB1	Chr4	9624289	4:9567428:A:T	Chr4	9567428	A	T	0.441288	-0.143147	0.00295906
ENSBTAG00000021996	GATAD1	Chr4	9764440	4:9766605:A:G	Chr4	9766605	A	G	0.311787	0.29233	2.024e-12
ENSBTAG00000034905	TMBIM7	Chr4	9765541	4:9755072:A:G	Chr4	9755072	A	G	0.282197	0.663606	4.19399e-15
ENSBTAG00000024431	PEX1	Chr4	9870626	4:10580508:C:T	Chr4	10580508	C	T	0.282197	-0.301094	0.0103751
ENSBTAG00000014255	VPS50	Chr4	10600801	4:11173310:TGGAATTTTCCAGGCAA:T	Chr4	11173310	TGGAATTTTCCAGGCAA	T	0.104167	-0.291508	0.0193548
ENSBTAG00000000820	GNG11	Chr4	11242534	4:11248245:G:A	Chr4	11248245	A	G	0.185606	0.149118	3.99932e-05
ENSBTAG00000009109	CASD1	Chr4	11886420	4:11887404:G:A	Chr4	11887404	G	A	0.272727	0.300358	1.31679e-15
ENSBTAG00000021282	SGCE	Chr4	12063687	4:13033594:T:A	Chr4	13033594	A	T	0.125	0.657718	0.000113902
ENSBTAG00000024426	PPP1R9A	Chr4	12191130	4:12299366:A:G	Chr4	12299366	A	G	0.140152	0.489241	4.01079e-09
ENSBTAG00000034645	PON3	Chr4	12631421	4:12155502:C:T	Chr4	12155502	C	T	0.276515	-0.500121	4.70942e-06
ENSBTAG00000008361	PON2	Chr4	12673193	4:12299162:A:T	Chr4	12299162	T	A	0.424242	0.177606	0.00141892
ENSBTAG00000015925	SDHAF3	Chr4	14476806	4:14536716:G:A	Chr4	14536716	G	A	0.100379	0.671716	9.09713e-10
ENSBTAG00000003222	ASNS	Chr4	15276513	4:15199705:C:T	Chr4	15199705	C	T	0.102273	0.398218	9.45713e-24
ENSBTAG00000004995	C1GALT1	Chr4	15276633	4:15278089:C:T	Chr4	15278089	T	C	0.17803	0.454119	1.51967e-08
ENSBTAG00000013781	MIOS	Chr4	15634973	4:15477453:A:C	Chr4	15477453	C	A	0.166667	-0.176136	0.00632751
ENSBTAG00000013168	RPA3	Chr4	15695690	4:15690356:A:G	Chr4	15690356	A	G	0.373106	-0.46438	1.59943e-19
ENSBTAG00000008533	GLCCI1	Chr4	16051522	4:16998072:C:G	Chr4	16998072	C	G	0.168561	-0.271923	0.00341696
ENSBTAG00000000799	ICA1	Chr4	16355628	4:16250151:C:T	Chr4	16250151	C	T	0.323864	0.225417	1.5326e-11
ENSBTAG00000011145	NDUFA4	Chr4	19049196	4:19422750:A:G	Chr4	19422750	A	G	0.0246212	-0.546225	0.00736682
ENSBTAG00000019750	TMEM106B	Chr4	20366147	4:20367992:C:T	Chr4	20367992	C	T	0.325758	0.191975	1.08614e-06
ENSBTAG00000009786	SCIN	Chr4	20624427	4:20007847:C:T	Chr4	20007847	C	T	0.325758	-0.41604	0.00382546
ENSBTAG00000002869	ARL4A	Chr4	20764661	4:20856228:A:AG	Chr4	20856228	A	AG	0.454545	0.354855	1.01947e-07
ENSBTAG00000010980	ANKMY2	Chr4	25130458	4:25123756:C:T	Chr4	25123756	T	C	0.280303	0.289782	5.22442e-06
ENSBTAG00000014262	BZW2	Chr4	25130691	4:25150756:C:T	Chr4	25150756	T	C	0.206439	0.324737	2.73572e-12
ENSBTAG00000012805	TSPAN13	Chr4	25245150	4:25449208:CAAATATTT:C	Chr4	25449208	C	CAAATATTT	0.448864	0.0985965	3.11763e-05
ENSBTAG00000007746	AHR	Chr4	25805797	4:25867338:T:C	Chr4	25867338	C	T	0.492424	-0.177961	8.99743e-11
ENSBTAG00000014074	SNX13	Chr4	26469689	4:26468430:A:AAAG	Chr4	26468430	AAAG	A	0.462121	0.100935	0.0260801
ENSBTAG00000006721	POLR1F	Chr4	28410479	4:28410444:C:T	Chr4	28410444	C	T	0.376894	-0.62388	2.96967e-24
ENSBTAG00000014389	SP4	Chr4	30225648	4:30021140:G:A	Chr4	30021140	G	A	0.443182	0.168169	2.60165e-12
ENSBTAG00000013078	DNAH11	Chr4	30324684	4:30374458:G:A	Chr4	30374458	A	G	0.492424	0.202856	0.000492342
ENSBTAG00000004976	CDCA7L	Chr4	30904166	4:30764179:G:T	Chr4	30764179	T	G	0.454545	0.139203	1.60785e-07
ENSBTAG00000016014	NUP42	Chr4	31829702	4:31614479:T:C	Chr4	31614479	T	C	0.289773	0.554861	5.82947e-12
ENSBTAG00000019403	MALSU1	Chr4	31917459	4:31959112:T:C	Chr4	31959112	C	T	0.445076	-0.277198	9.74151e-06
ENSBTAG00000012622	TRA2A	Chr4	32135318	4:32187388:A:G	Chr4	32187388	A	G	0.145833	-0.196738	9.90211e-07
ENSBTAG00000021313	RUNDC3B	Chr4	32564175	4:32602998:TG:T	Chr4	32602998	T	TG	0.232955	0.21187	5.17322e-15
ENSBTAG00000005997	NA	Chr4	32880213	4:32657204:A:G	Chr4	32657204	A	G	0.181818	0.253283	6.60889e-11
ENSBTAG00000005653	ABCB4	Chr4	33006670	4:33250362:G:A	Chr4	33250362	G	A	0.19697	0.761066	1.73702e-05
ENSBTAG00000038283	TMEM243	Chr4	33226968	4:33226588:C:A	Chr4	33226588	A	C	0.496212	0.257495	4.64166e-20
ENSBTAG00000020878	DMTF1	Chr4	33286857	4:33318858:C:T	Chr4	33318858	C	T	0.189394	-0.147837	0.00280677
ENSBTAG00000004023	ELAPOR2	Chr4	33398733	4:33070750:A:G	Chr4	33070750	A	G	0.0909091	0.295147	0.000801886
ENSBTAG00000017866	CD36	Chr4	40443336	4:40718590:A:G	Chr4	40718590	A	G	0.160985	0.29705	0.00604252
ENSBTAG00000002714	GNAI1	Chr4	41062151	4:41205780:G:A	Chr4	41205780	G	A	0.4375	-0.237749	1.34225e-08
ENSBTAG00000003825	PTPN12	Chr4	43690863	4:43429098:C:CA	Chr4	43429098	C	CA	0.0738636	0.133171	0.00278052
ENSBTAG00000018430	GSAP	Chr4	43815427	4:43664242:G:A	Chr4	43664242	G	A	0.363636	0.11241	0.00708796
ENSBTAG00000009717	FGL2	Chr4	44000212	4:43970375:T:TTC	Chr4	43970375	TTC	T	0.401515	0.0869998	1.73142e-07
ENSBTAG00000009341	CCDC146	Chr4	44057818	4:44091199:A:G	Chr4	44091199	A	G	0.458333	0.287258	1.78652e-11
ENSBTAG00000014879	FAM185A	Chr4	44057956	4:44223395:A:AATG	Chr4	44223395	AATG	A	0.335227	0.353227	9.12005e-10
ENSBTAG00000014161	ARMC10	Chr4	44363509	4:44359965:T:TA	Chr4	44359965	T	TA	0.225379	0.257037	0.000170748
ENSBTAG00000006876	PMPCB	Chr4	44516586	4:44608215:A:G	Chr4	44608215	A	G	0.0492424	0.399002	1.06223e-06
ENSBTAG00000003784	DNAJC2	Chr4	44565511	4:44259979:T:C	Chr4	44259979	C	T	0.325758	0.160092	0.00823966
ENSBTAG00000046712	PSMC2	Chr4	44569084	4:44506378:T:C	Chr4	44506378	C	T	0.263258	-0.185525	1.49002e-08
ENSBTAG00000040058	ORC5	Chr4	45418109	4:45875205:G:T	Chr4	45875205	G	T	0.0757576	0.607986	9.90881e-15
ENSBTAG00000047286	NA	Chr4	46340362	4:45365329:A:T	Chr4	45365329	A	T	0.0625	-0.282771	0.00582484
ENSBTAG00000053913	NA	Chr4	46384654	4:47354930:T:TG	Chr4	47354930	T	TG	0.143939	0.490539	0.0236334
ENSBTAG00000002175	SRPK2	Chr4	46536298	4:46424991:G:C	Chr4	46424991	G	C	0.100379	-0.35761	4.23726e-09
ENSBTAG00000007743	PUS7	Chr4	46640231	4:46029905:T:C	Chr4	46029905	T	C	0.176136	-0.359083	0.0155642
ENSBTAG00000008302	RINT1	Chr4	46646923	4:46575633:A:T	Chr4	46575633	T	A	0.388258	0.272861	3.67092e-05
ENSBTAG00000049733	ATXN7L1	Chr4	46955175	4:46936396:G:A	Chr4	46936396	G	A	0.0984849	0.249323	0.0132126
ENSBTAG00000019794	SYPL1	Chr4	47180223	4:47419050:G:A	Chr4	47419050	G	A	0.102273	0.30431	2.16695e-05
ENSBTAG00000014958	PRKAR2B	Chr4	48154066	4:47483560:T:G	Chr4	47483560	T	G	0.19697	0.347492	7.87937e-06
ENSBTAG00000021849	DUS4L	Chr4	48572837	4:48595463:TGTTA:T	Chr4	48595463	TGTTA	T	0.409962	-0.183341	5.32754e-07
ENSBTAG00000018348	CBLL1	Chr4	48759143	4:49404525:A:G	Chr4	49404525	G	A	0.153409	-0.389385	0.0246545
ENSBTAG00000001908	DLD	Chr4	48953178	4:49022872:T:C	Chr4	49022872	T	C	0.274621	-0.16719	0.000304829
ENSBTAG00000033197	EPDR1	Chr4	49750584	4:49547687:T:G	Chr4	49547687	T	G	0.445076	0.195452	0.0036871
ENSBTAG00000038795	STARD3NL	Chr4	49987459	4:50045202:A:G	Chr4	50045202	A	G	0.214015	0.214431	0.000179876
ENSBTAG00000036154	TARP	Chr4	50162526	4:50041614:ACGCG:A	Chr4	50041614	ACGCG	A	0.0435606	-0.674675	0.00335404
ENSBTAG00000000169	ASZ1	Chr4	51002522	4:51002450:C:T	Chr4	51002450	T	C	0.285985	-0.256783	3.23033e-10
ENSBTAG00000004072	CAPZA2	Chr4	51546693	4:51593191:GA:G	Chr4	51593191	GA	G	0.454545	0.103827	2.26248e-12
ENSBTAG00000006161	MET	Chr4	51735652	4:52009582:A:G	Chr4	52009582	G	A	0.420455	-0.252159	3.36551e-12
ENSBTAG00000017869	CAV1	Chr4	51901396	4:52001861:C:T	Chr4	52001861	C	T	0.465909	0.338817	0.0164825
ENSBTAG00000049397	CAV2	Chr4	51929009	4:51322104:T:C	Chr4	51322104	T	C	0.0833333	0.358166	0.00630949
ENSBTAG00000021204	TES	Chr4	52225054	4:52292991:G:C	Chr4	52292991	G	C	0.405303	0.207016	3.54668e-13
ENSBTAG00000014228	TFEC	Chr4	52282340	4:52896649:G:T	Chr4	52896649	G	T	0.3125	-0.106306	4.52778e-05
ENSBTAG00000007608	BMT2	Chr4	55467397	4:55424840:G:C	Chr4	55424840	G	C	0.219697	-0.128881	0.00462733
ENSBTAG00000021967	TMEM168	Chr4	55560580	4:55585924:C:T	Chr4	55585924	C	T	0.145833	-0.127837	0.00342716
ENSBTAG00000010555	LSMEM1	Chr4	55859542	4:55913799:G:A	Chr4	55913799	G	A	0.416667	-0.176051	0.0126225
ENSBTAG00000010549	IFRD1	Chr4	55887646	4:55913799:G:A	Chr4	55913799	G	A	0.416667	-0.136979	1.95795e-07
ENSBTAG00000021182	DOCK4	Chr4	56119634	4:56126902:AT:A	Chr4	56126902	AT	A	0.267045	0.123447	1.97283e-07
ENSBTAG00000013050	ZNF277	Chr4	56120652	4:56126902:AT:A	Chr4	56126902	AT	A	0.267045	5.25369e-08	4.39787e-21
ENSBTAG00000004398	IMMP2L	Chr4	56808964	4:57031716:GA:G	Chr4	57031716	GA	G	0.306818	0.291699	0.00155114
ENSBTAG00000004399	LRRN3	Chr4	57223087	4:56997676:G:A	Chr4	56997676	A	G	0.473485	-0.454863	0.000130001
ENSBTAG00000021869	THAP5	Chr4	59588216	4:59554243:G:C	Chr4	59554243	G	C	0.0700758	0.475591	7.23622e-09
ENSBTAG00000002154	GPR141	Chr4	59643306	4:59736161:A:C	Chr4	59736161	A	C	0.270833	0.285877	1.46752e-13
ENSBTAG00000003490	ELMO1	Chr4	59867413	4:60343569:T:C	Chr4	60343569	T	C	0.125	0.219593	0.00100901
ENSBTAG00000018119	AOAH	Chr4	60544209	4:60585058:C:T	Chr4	60585058	C	T	0.403409	-0.282279	2.83773e-07
ENSBTAG00000009218	ANLN	Chr4	60825953	4:60826457:C:T	Chr4	60826457	C	T	0.225379	0.5107	1.49453e-15
ENSBTAG00000001182	SEPTIN7	Chr4	61302729	4:61301921:C:T	Chr4	61301921	C	T	0.151515	-0.120883	0.00130472
ENSBTAG00000005785	DPY19L1	Chr4	61976305	4:61894014:TTTTTAA:T	Chr4	61894014	TTTTTAA	T	0.272727	-0.167087	6.12646e-10
ENSBTAG00000006528	BBS9	Chr4	63708251	4:63563157:A:C	Chr4	63563157	C	A	0.304924	0.198763	8.88922e-05
ENSBTAG00000032598	RP9	Chr4	63733827	4:63762574:G:C	Chr4	63762574	G	C	0.310606	0.321382	8.52168e-08
ENSBTAG00000016707	FKBP9	Chr4	63854573	4:63575942:C:T	Chr4	63575942	C	T	0.155303	-0.439503	0.0221627
ENSBTAG00000003115	KBTBD2	Chr4	63912711	4:63963286:C:T	Chr4	63963286	C	T	0.244318	0.204527	1.0301e-06
ENSBTAG00000003114	AVL9	Chr4	64010228	4:64027757:C:G	Chr4	64027757	G	C	0.342803	0.253742	9.63671e-11
ENSBTAG00000020247	ADCYAP1R1	Chr4	65377107	4:65248625:A:G	Chr4	65248625	A	G	0.0984849	-0.280283	6.70298e-07
ENSBTAG00000018972	GARS1	Chr4	65758270	4:65633183:A:G	Chr4	65633183	A	G	0.308712	-0.177413	0.00173563
ENSBTAG00000051818	NA	Chr4	65785077	4:65858610:G:A	Chr4	65858610	G	A	0.0757576	-0.783422	2.71271e-08
ENSBTAG00000010597	GGCT	Chr4	65806683	4:65899044:C:CT	Chr4	65899044	C	CT	0.138258	0.238531	1.25754e-05
ENSBTAG00000000260	ZNRF2	Chr4	66053326	4:65893690:G:A	Chr4	65893690	A	G	0.251894	0.130267	1.59239e-06
ENSBTAG00000000521	PLEKHA8	Chr4	66328519	4:66208404:G:A	Chr4	66208404	G	A	0.111742	-0.638625	8.7834e-08
ENSBTAG00000007870	FKBP14	Chr4	66328678	4:66338599:CAT:C	Chr4	66338599	C	CAT	0.443182	0.123121	4.6422e-16
ENSBTAG00000018909	CREB5	Chr4	67752296	4:67458645:A:G	Chr4	67458645	A	G	0.212121	2.35527e-07	5.7461e-06
ENSBTAG00000001036	HIBADH	Chr4	68473795	4:68524542:T:C	Chr4	68524542	T	C	0.431818	0.190406	0.000642663
ENSBTAG00000005650	SKAP2	Chr4	69125497	4:69133838:C:T	Chr4	69133838	T	C	0.414773	-0.0780592	0.000184284
ENSBTAG00000001822	SNX10	Chr4	69655430	4:69626495:C:T	Chr4	69626495	T	C	0.441288	-0.133222	2.42399e-06
ENSBTAG00000049437	CBX3	Chr4	69734069	4:69946447:GCAAA:G	Chr4	69946447	GCAAA	G	0.0776515	-0.166003	0.000159226
ENSBTAG00000004136	NFE2L3	Chr4	69782790	4:69237162:G:T	Chr4	69237162	G	T	0.109848	0.140004	0.000691463
ENSBTAG00000019342	OSBPL3	Chr4	70844946	4:70950871:T:C	Chr4	70950871	C	T	0.376894	0.274464	7.94077e-13
ENSBTAG00000015326	GSDME	Chr4	71088327	4:71048660:C:G	Chr4	71048660	C	G	0.267045	-0.33801	5.88365e-10
ENSBTAG00000015303	PALS2	Chr4	71303589	4:71192627:T:A	Chr4	71192627	T	A	0.291667	0.330129	0.00025878
ENSBTAG00000010390	SRI	Chr4	72342353	4:72440306:C:A	Chr4	72440306	C	A	0.0473485	0.459342	0.0243203
ENSBTAG00000003506	STEAP2	Chr4	74405140	4:74365434:C:T	Chr4	74365434	T	C	0.217803	0.261373	2.49734e-07
ENSBTAG00000032166	GTPBP10	Chr4	74533034	4:74531375:T:C	Chr4	74531375	C	T	0.1875	0.499181	7.61514e-14
ENSBTAG00000013226	HUS1	Chr4	74573945	4:74452613:A:G	Chr4	74452613	G	A	0.426136	-0.155716	0.000144061
ENSBTAG00000009655	TNS3	Chr4	74779687	4:74275102:T:C	Chr4	74275102	T	C	0.265152	-0.132824	2.1422e-05
ENSBTAG00000010504	TBRG4	Chr4	76522745	4:76554110:C:T	Chr4	76554110	T	C	0.107955	0.158778	9.46691e-07
ENSBTAG00000052466	NA	Chr4	76611351	4:76639185:A:G	Chr4	76639185	G	A	0.435606	-0.245045	1.26304e-05
ENSBTAG00000006377	MYO1G	Chr4	76617185	4:76623396:C:T	Chr4	76623396	C	T	0.318182	0.109557	3.9237e-07
ENSBTAG00000012237	AEBP1	Chr4	77209981	4:77209787:A:G	Chr4	77209787	G	A	0.295802	-0.185402	9.46356e-05
ENSBTAG00000007796	POLM	Chr4	77228351	4:77227963:G:A	Chr4	77227963	A	G	0.439394	0.190856	0.00125928
ENSBTAG00000013414	BLVRA	Chr4	77335575	4:77325460:G:A	Chr4	77325460	G	A	0.410985	-0.363322	2.16411e-06
ENSBTAG00000012968	COA1	Chr4	77371217	4:77383965:T:G	Chr4	77383965	T	G	0.420152	0.251295	7.17989e-07
ENSBTAG00000000991	MRPL32	Chr4	78126851	4:78173678:TTGGGACTGC:T	Chr4	78173678	TTGGGACTGC	T	0.431818	0.547764	7.17458e-18
ENSBTAG00000000990	PSMA2	Chr4	78127062	4:78955020:T:TAGC	Chr4	78955020	T	TAGC	0.219697	0.0997078	0.0235119
ENSBTAG00000032121	SUGCT	Chr4	80928936	4:80914498:TCAGC:T	Chr4	80914498	TCAGC	T	0.143939	0.494809	1.85386e-06
ENSBTAG00000007305	VPS41	Chr4	81966838	4:82195310:A:G	Chr4	82195310	A	G	0.337121	-0.267718	4.58298e-13
ENSBTAG00000000144	NA	Chr4	82533902	4:82582488:A:T	Chr4	82582488	T	A	0.393939	-0.244181	4.46001e-07
ENSBTAG00000053474	NA	Chr4	82638576	4:82709649:T:G	Chr4	82709649	G	T	0.450758	0.328176	0.0261568
ENSBTAG00000055254	NA	Chr4	82692177	4:82709649:T:G	Chr4	82709649	G	T	0.450758	0.378842	0.000137203
ENSBTAG00000002859	NA	Chr4	82720174	4:83497557:A:G	Chr4	83497557	A	G	0.255682	-0.36811	1.74758e-11
ENSBTAG00000049399	NA	Chr4	82745644	4:83533447:G:T	Chr4	83533447	G	T	0.287879	-0.339852	9.44398e-08
ENSBTAG00000002938	CPED1	Chr4	85491228	4:85496392:C:A	Chr4	85496392	A	C	0.356061	0.281735	1.86579e-05
ENSBTAG00000007976	FAM3C	Chr4	85918137	4:85865947:A:C	Chr4	85865947	A	C	0.215909	0.191502	0.000873921
ENSBTAG00000009334	NDUFA5	Chr4	87887305	4:88511189:C:T	Chr4	88511189	C	T	0.253788	0.144436	0.0030258
ENSBTAG00000013180	POT1	Chr4	89183193	4:89184424:C:T	Chr4	89184424	C	T	0.168561	0.201578	5.15629e-07
ENSBTAG00000054974	GRM8	Chr4	91510132	4:91853116:GC:G	Chr4	91853116	G	GC	0.25	0.294167	9.47102e-05
ENSBTAG00000009366	ARF5	Chr4	91819099	4:91003527:T:G	Chr4	91003527	T	G	0.0227273	-1.71005	0.000225158
ENSBTAG00000017001	RBM28	Chr4	92531680	4:92525691:C:T	Chr4	92525691	C	T	0.125	0.43507	4.2554e-10
ENSBTAG00000000296	IMPDH1	Chr4	92586808	4:93574556:GC:G	Chr4	93574556	G	GC	0.356061	-0.132442	3.54335e-05
ENSBTAG00000016481	CALU	Chr4	92719266	4:92287996:G:A	Chr4	92287996	A	G	0.0530303	-0.190745	0.0175689
ENSBTAG00000011002	CCDC136	Chr4	92763332	4:92511139:T:C	Chr4	92511139	T	C	0.369318	-0.125161	1.51962e-15
ENSBTAG00000007572	ATP6V1F	Chr4	92828150	4:92624597:T:A	Chr4	92624597	T	A	0.274621	-0.168174	0.011473
ENSBTAG00000003449	KCP	Chr4	92873142	4:92888722:G:A	Chr4	92888722	G	A	0.142045	-0.385695	4.73575e-08
ENSBTAG00000004989	IRF5	Chr4	92892128	4:92929973:A:T	Chr4	92929973	A	T	0.429924	0.146803	1.46126e-06
ENSBTAG00000001754	AHCYL2	Chr4	93142665	4:93423960:C:T	Chr4	93423960	T	C	0.371212	0.393289	9.45682e-11
ENSBTAG00000007206	STRIP2	Chr4	93338889	4:93400123:C:T	Chr4	93400123	T	C	0.409091	-0.110453	1.38296e-08
ENSBTAG00000015588	TMEM209	Chr4	93983043	4:93064807:C:T	Chr4	93064807	C	T	0.117424	-0.318056	0.0201586
ENSBTAG00000046648	CPA4	Chr4	94046270	4:94028896:C:A	Chr4	94028896	A	C	0.4375	0.581272	2.34331e-15
ENSBTAG00000013476	CPA5	Chr4	94063808	4:94028896:C:A	Chr4	94028896	A	C	0.4375	0.303426	7.1593e-18
ENSBTAG00000007413	CEP41	Chr4	94192546	4:94192166:C:T	Chr4	94192166	T	C	0.359848	-0.392468	3.24161e-06
ENSBTAG00000017245	COPG2	Chr4	94443596	4:94405042:A:G	Chr4	94405042	A	G	0.172348	0.429017	1.09156e-06
ENSBTAG00000010437	MKLN1	Chr4	95025993	4:95373534:G:A	Chr4	95373534	G	A	0.119318	-0.111947	2.29677e-10
ENSBTAG00000024723	CHCHD3	Chr4	96761348	4:97547221:C:T	Chr4	97547221	C	T	0.138258	-0.238663	0.0253275
ENSBTAG00000014112	EXOC4	Chr4	96940093	4:96946874:T:G	Chr4	96946874	G	T	0.276515	-0.221754	2.19067e-09
ENSBTAG00000003372	SLC35B4	Chr4	97975400	4:97788989:T:C	Chr4	97788989	T	C	0.0814394	-0.507721	3.07792e-10
ENSBTAG00000009902	AKR1B1	Chr4	98132148	4:98480387:C:T	Chr4	98480387	T	C	0.159091	0.274962	0.00206868
ENSBTAG00000001576	TMEM140	Chr4	98798512	4:98732332:TA:T	Chr4	98732332	T	TA	0.140152	-0.182774	0.000311225
ENSBTAG00000001773	CYREN	Chr4	98814946	4:98539220:A:G	Chr4	98539220	A	G	0.412879	-0.333242	0.000832899
ENSBTAG00000017905	WDR91	Chr4	98849268	4:98849290:G:A	Chr4	98849290	G	A	0.160985	0.767594	2.76347e-11
ENSBTAG00000031548	NA	Chr4	98969970	4:99132800:C:CA	Chr4	99132800	C	CA	0.231061	0.285787	1.96795e-19
ENSBTAG00000047605	NA	Chr4	99055474	4:99119643:T:TA	Chr4	99119643	T	TA	0.344697	0.220547	3.42169e-13
ENSBTAG00000054978	NA	Chr4	99088132	4:99816223:T:C	Chr4	99816223	C	T	0.32197	0.23195	1.5687e-12
ENSBTAG00000047088	NA	Chr4	99135175	4:99126346:G:GA	Chr4	99126346	GA	G	0.427757	0.20344	5.9719e-29
ENSBTAG00000011127	NUP205	Chr4	99335498	4:99364387:C:CT	Chr4	99364387	C	CT	0.397727	-0.14501	0.005218
ENSBTAG00000007806	MTPN	Chr4	99827165	4:99880438:G:T	Chr4	99880438	T	G	0.236742	0.26121	2.00306e-08
ENSBTAG00000002431	TRIM24	Chr4	102170008	4:102740184:C:T	Chr4	102740184	T	C	0.0625	0.369308	0.000874826
ENSBTAG00000004263	ATP6V0A4	Chr4	102436384	4:102467904:C:T	Chr4	102467904	C	T	0.217803	-0.247869	6.31553e-06
ENSBTAG00000001527	TMEM213	Chr4	102461081	4:102484892:T:A	Chr4	102484892	T	A	0.215909	-0.471057	5.15405e-06
ENSBTAG00000014250	ZC3HAV1L	Chr4	102653875	4:102646500:A:C	Chr4	102646500	C	A	0.261364	0.589128	5.04405e-13
ENSBTAG00000017770	NA	Chr4	102906444	4:103582316:TA:T	Chr4	103582316	TA	T	0.227273	-0.172655	6.02148e-05
ENSBTAG00000020225	TBXAS1	Chr4	103295392	4:103361716:G:C	Chr4	103361716	G	C	0.153409	-0.231358	2.19198e-05
ENSBTAG00000016546	PARP12	Chr4	103519158	4:103562619:G:A	Chr4	103562619	A	G	0.403409	0.192701	0.000329973
ENSBTAG00000012261	RAB19	Chr4	103792987	4:103832776:A:G	Chr4	103832776	A	G	0.102273	0.304421	0.000612702
ENSBTAG00000012239	SLC37A3	Chr4	103796965	4:103764640:G:GCCTGACC	Chr4	103764640	GCCTGACC	G	0.407197	0.172559	5.57041e-14
ENSBTAG00000008306	MKRN1	Chr4	103842924	4:103842234:G:C	Chr4	103842234	G	C	0.441288	-0.145978	0.00228582
ENSBTAG00000019265	AGK	Chr4	104801729	4:105481867:C:T	Chr4	105481867	C	T	0.109848	0.500819	0.00102469
ENSBTAG00000020453	CLEC5A	Chr4	105231958	4:105225140:A:G	Chr4	105225140	A	G	0.0416667	-0.334766	5.06615e-09
ENSBTAG00000046152	MGAM	Chr4	105285316	4:105230186:G:A	Chr4	105230186	G	A	0.210227	-0.235515	2.82379e-12
ENSBTAG00000048852	TRBV3-1	Chr4	105567722	4:105748670:C:T	Chr4	105748670	C	T	0.481061	-0.484821	2.27135e-09
ENSBTAG00000031234	NA	Chr4	105572012	4:105723944:G:A	Chr4	105723944	G	A	0.284091	0.493518	4.97374e-14
ENSBTAG00000053682	NA	Chr4	105597509	4:105748670:C:T	Chr4	105748670	C	T	0.481061	-0.569248	1.91656e-14
ENSBTAG00000051786	NA	Chr4	105602814	4:105586662:G:A	Chr4	105586662	G	A	0.149621	-0.517215	2.16035e-06
ENSBTAG00000048597	NA	Chr4	105625077	4:105723944:G:A	Chr4	105723944	G	A	0.284091	0.372972	2.14206e-13
ENSBTAG00000050773	NA	Chr4	105629382	4:105641078:G:T	Chr4	105641078	G	T	0.0814394	-0.467424	1.74288e-09
ENSBTAG00000049810	NA	Chr4	105641094	4:105748815:G:A	Chr4	105748815	G	A	0.304924	-0.471224	0.000801313
ENSBTAG00000050745	NA	Chr4	105653053	4:106126414:T:C	Chr4	106126414	T	C	0.126894	-0.861017	1.51045e-16
ENSBTAG00000040387	NA	Chr4	105683194	4:105699738:A:T	Chr4	105699738	A	T	0.0890151	0.683236	2.9669e-05
ENSBTAG00000053109	NA	Chr4	105701550	4:105697481:C:CT	Chr4	105697481	CT	C	0.310606	0.464653	2.28088e-22
ENSBTAG00000050211	NA	Chr4	105716616	4:105788070:G:A	Chr4	105788070	G	A	0.219697	-0.462704	1.4986e-09
ENSBTAG00000039559	NA	Chr4	105721903	4:105281554:GTGTA:G	Chr4	105281554	GTGTA	G	0.0397727	-0.899842	1.78975e-12
ENSBTAG00000053458	NA	Chr4	105738229	4:105721309:A:G	Chr4	105721309	G	A	0.268939	-0.239828	3.12958e-08
ENSBTAG00000049622	NA	Chr4	105743550	4:105803325:CT:C	Chr4	105803325	CT	C	0.270833	0.453105	5.36513e-11
ENSBTAG00000051811	NA	Chr4	105767866	4:106018632:T:C	Chr4	106018632	C	T	0.310606	0.500587	3.80399e-15
ENSBTAG00000052851	NA	Chr4	105782234	4:105774315:A:G	Chr4	105774315	G	A	0.488636	-0.377532	4.635e-08
ENSBTAG00000051371	NA	Chr4	105782623	4:105360129:CATATT:C	Chr4	105360129	CATATT	C	0.409091	0.292964	0.00967061
ENSBTAG00000048775	TRBV15	Chr4	105787691	4:105774315:A:G	Chr4	105774315	G	A	0.488636	0.418712	3.57329e-18
ENSBTAG00000038605	NA	Chr4	105805131	4:106033157:C:T	Chr4	106033157	T	C	0.289773	-0.50182	3.62723e-10
ENSBTAG00000026068	NA	Chr4	105836217	4:106005019:A:T	Chr4	106005019	T	A	0.448864	-0.493197	1.02349e-11
ENSBTAG00000050190	NA	Chr4	105986781	4:105984048:AC:A	Chr4	105984048	A	AC	0.0890151	1.44006	7.55187e-10
ENSBTAG00000053376	NA	Chr4	106015474	4:106027047:C:T	Chr4	106027047	C	T	0.13447	0.400993	0.000172042
ENSBTAG00000052228	TRBV24-1	Chr4	106025049	4:106005853:G:A	Chr4	106005853	G	A	0.310606	-0.249381	1.72233e-08
ENSBTAG00000053701	NA	Chr4	106030566	4:106271018:G:A	Chr4	106271018	G	A	0.25	0.335997	0.00871974
ENSBTAG00000053785	NA	Chr4	106032077	4:106059668:G:GA	Chr4	106059668	G	GA	0.238636	-0.638752	6.08083e-14
ENSBTAG00000054917	NA	Chr4	106044579	4:106257525:G:A	Chr4	106257525	G	A	0.104167	-0.807857	7.01362e-14
ENSBTAG00000051147	NA	Chr4	106051440	4:106070333:G:GC	Chr4	106070333	GC	G	0.420152	-0.621631	4.17018e-18
ENSBTAG00000049004	NA	Chr4	106056262	4:105756738:G:A	Chr4	105756738	A	G	0.456439	0.343072	2.12353e-05
ENSBTAG00000047919	NA	Chr4	106056470	4:106194254:T:C	Chr4	106194254	T	C	0.363636	-0.500756	5.82184e-08
ENSBTAG00000034609	NA	Chr4	106082257	4:105748687:C:G	Chr4	105748687	C	G	0.208333	0.159095	1.23249e-13
ENSBTAG00000027204	NA	Chr4	106102214	4:105563763:G:A	Chr4	105563763	A	G	0.17803	-0.240096	2.64342e-18
ENSBTAG00000009558	TRBV30	Chr4	106121757	4:106573461:T:G	Chr4	106573461	T	G	0.36553	0.231147	0.0100023
ENSBTAG00000009839	GSTK1	Chr4	106651015	4:106707158:CCT:C	Chr4	106707158	C	CCT	0.3125	0.168233	5.94084e-08
ENSBTAG00000009418	FAM131B	Chr4	106749085	4:106703735:A:G	Chr4	106703735	G	A	0.471591	0.166771	0.0085408
ENSBTAG00000017970	ZYX	Chr4	106775573	4:106839790:T:G	Chr4	106839790	G	T	0.407197	-0.13031	0.000567699
ENSBTAG00000005475	TCAF2	Chr4	107001714	4:107149548:G:A	Chr4	107149548	A	G	0.467803	0.511408	7.89989e-09
ENSBTAG00000002554	TCAF1	Chr4	107070624	4:107062556:T:C	Chr4	107062556	T	C	0.181818	-0.127106	4.79914e-09
ENSBTAG00000017676	TPK1	Chr4	108101163	4:107994742:C:T	Chr4	107994742	C	T	0.204981	-0.331663	4.44971e-08
ENSBTAG00000051633	NA	Chr4	111758121	4:111791498:A:C	Chr4	111791498	A	C	0.475379	-0.305768	1.22311e-16
ENSBTAG00000008736	CUL1	Chr4	111931202	4:112080982:AC:A	Chr4	112080982	A	AC	0.417939	-0.418036	5.45366e-18
ENSBTAG00000043936	Y_RNA	Chr4	112140340	4:112138169:C:T	Chr4	112138169	C	T	0.486742	-0.125327	9.27736e-05
ENSBTAG00000043461	Y_RNA	Chr4	112179861	4:112514031:A:T	Chr4	112514031	A	T	0.0643939	-0.406595	6.05026e-13
ENSBTAG00000043086	Y_RNA	Chr4	112184336	4:111968551:A:G	Chr4	111968551	A	G	0.0435606	-0.409302	3.19723e-05
ENSBTAG00000017143	PDIA4	Chr4	112215554	4:112221181:G:A	Chr4	112221181	A	G	0.32197	0.114249	2.16993e-06
ENSBTAG00000014768	ZNF786	Chr4	112243363	4:112267469:A:G	Chr4	112267469	G	A	0.484848	0.266244	3.10846e-10
ENSBTAG00000049343	NA	Chr4	112564765	4:112756371:T:A	Chr4	112756371	T	A	0.333333	0.35262	0.0103514
ENSBTAG00000010219	KRBA1	Chr4	112569851	4:112756371:T:A	Chr4	112756371	T	A	0.333333	0.328065	6.35908e-06
ENSBTAG00000019844	ZNF467	Chr4	112621523	4:112759807:T:C	Chr4	112759807	T	C	0.128788	-0.261846	0.00502746
ENSBTAG00000008542	SSPO	Chr4	112625942	4:112737600:G:C	Chr4	112737600	G	C	0.429924	0.413433	2.44457e-24
ENSBTAG00000039594	ZNF862	Chr4	112681947	4:112037433:A:G	Chr4	112037433	G	A	0.456439	-0.162616	0.00476082
ENSBTAG00000006022	ATP6V0E2	Chr4	112715025	4:112672852:T:C	Chr4	112672852	T	C	0.251894	0.454309	1.55449e-07
ENSBTAG00000031059	LRRC61	Chr4	112737746	4:112743946:G:A	Chr4	112743946	G	A	0.17803	0.309575	0.00091389
ENSBTAG00000038241	REPIN1	Chr4	112782528	4:112802880:A:G	Chr4	112802880	G	A	0.42803	-0.380866	7.94395e-08
ENSBTAG00000007983	ZNF775	Chr4	112791823	4:112739345:CA:C	Chr4	112739345	C	CA	0.340909	0.366537	0.00110023
ENSBTAG00000049318	NA	Chr4	112823302	4:112148281:C:A	Chr4	112148281	A	C	0.454545	-0.355362	0.00816472
ENSBTAG00000014402	GIMAP8	Chr4	112850271	4:113475234:G:A	Chr4	113475234	G	A	0.183712	0.105085	8.45466e-09
ENSBTAG00000009850	GIMAP7	Chr4	112898194	4:113269816:T:G	Chr4	113269816	T	G	0.248106	0.200472	5.45808e-28
ENSBTAG00000039588	NA	Chr4	112945712	4:112991699:TA:T	Chr4	112991699	T	TA	0.465909	-0.0639692	1.91933e-14
ENSBTAG00000001198	GIMAP7	Chr4	112958969	4:113051552:A:AT	Chr4	113051552	A	AT	0.289773	0.126581	3.52858e-25
ENSBTAG00000046257	GIMAP4	Chr4	113074368	4:113055277:A:ATTG	Chr4	113055277	A	ATTG	0.287879	-0.261058	2.91881e-21
ENSBTAG00000030940	GIMAP7	Chr4	113120508	4:112956229:TA:T	Chr4	112956229	T	TA	0.395833	-2.35923e-07	7.97892e-14
ENSBTAG00000040331	NA	Chr4	113139056	4:112519136:G:A	Chr4	112519136	A	G	0.445076	0.0488932	3.12831e-09
ENSBTAG00000011240	NA	Chr4	113192317	4:112958565:C:G	Chr4	112958565	G	C	0.357955	0.176413	5.59744e-27
ENSBTAG00000054649	NA	Chr4	113233117	4:112990429:T:C	Chr4	112990429	C	T	0.458333	-3.0316e-07	4.45271e-23
ENSBTAG00000050052	NA	Chr4	113268350	4:113307323:T:A	Chr4	113307323	A	T	0.486742	0.170023	1.83749e-11
ENSBTAG00000008550	GIMAP7	Chr4	113276470	4:113388503:T:A	Chr4	113388503	T	A	0.325758	0.207719	1.79618e-16
ENSBTAG00000037510	NA	Chr4	113314341	4:113314261:C:T	Chr4	113314261	C	T	0.394309	-0.262241	1.27588e-15
ENSBTAG00000004894	GIMAP5	Chr4	113328044	4:113317630:GTGTC:G	Chr4	113317630	GTGTC	G	0.460227	-0.159707	1.09918e-05
ENSBTAG00000000715	NA	Chr4	113356352	4:112711595:G:A	Chr4	112711595	A	G	0.314394	-0.141267	6.47628e-14
ENSBTAG00000004078	KCNH2	Chr4	113561800	4:113547256:T:C	Chr4	113547256	T	C	0.110204	0.533075	9.22374e-19
ENSBTAG00000007759	ABCB8	Chr4	113605322	4:113932459:G:A	Chr4	113932459	G	A	0.0606061	-0.272578	0.0110775
ENSBTAG00000011226	SLC4A2	Chr4	113636353	4:113888868:T:C	Chr4	113888868	T	C	0.462121	0.216879	0.0154432
ENSBTAG00000011228	FASTK	Chr4	113656055	4:113054829:T:C	Chr4	113054829	T	C	0.123106	-0.385913	3.46697e-05
ENSBTAG00000011229	TMUB1	Chr4	113658879	4:113658856:C:A	Chr4	113658856	C	A	0.260456	-0.122625	0.000411471
ENSBTAG00000000607	ABCF2	Chr4	113803468	4:113869801:TG:T	Chr4	113869801	T	TG	0.357955	-0.204205	5.37043e-07
ENSBTAG00000014371	CHPF2	Chr4	113811848	4:113496122:GGAA:G	Chr4	113496122	GGAA	G	0.164773	-0.194596	0.00526463
ENSBTAG00000014372	SMARCD3	Chr4	113848095	4:113844359:G:A	Chr4	113844359	A	G	0.420455	-0.384654	9.24643e-09
ENSBTAG00000004540	NUB1	Chr4	113890452	4:113937311:C:T	Chr4	113937311	C	T	0.117424	-0.162534	1.03238e-06
ENSBTAG00000002917	PRKAG2	Chr4	114415801	4:114109452:G:T	Chr4	114109452	T	G	0.168561	-0.199531	5.26661e-05
ENSBTAG00000045535	GALNTL5	Chr4	114477817	4:114504568:G:A	Chr4	114504568	A	G	0.486742	0.556092	3.14227e-12
ENSBTAG00000021260	GALNT11	Chr4	114567410	4:114504568:G:A	Chr4	114504568	A	G	0.486742	0.580671	1.14061e-24
ENSBTAG00000030897	XRCC2	Chr4	115054271	4:115072381:A:G	Chr4	115072381	G	A	0.445076	0.505606	1.31831e-17
ENSBTAG00000000397	CNPY1	Chr4	117301793	4:117165724:C:T	Chr4	117165724	C	T	0.0776515	-0.469712	9.3435e-05
ENSBTAG00000010243	RBM33	Chr4	117366284	4:117616443:A:G	Chr4	117616443	G	A	0.469697	-0.137835	0.00254435
ENSBTAG00000030817	LMBR1	Chr4	118297036	4:118499549:C:T	Chr4	118499549	T	C	0.390152	-0.276794	0.00116446
ENSBTAG00000016435	NOM1	Chr4	118348695	4:118452440:AT:A	Chr4	118452440	A	AT	0.0890151	-0.257142	0.000946335
ENSBTAG00000008025	UBE3C	Chr4	118465390	4:118510443:A:G	Chr4	118510443	A	G	0.267045	-0.483184	2.55891e-13
ENSBTAG00000000771	DNAJB6	Chr4	118628471	4:118597521:A:G	Chr4	118597521	A	G	0.287879	0.373866	3.9784e-12
ENSBTAG00000005483	ESYT2	Chr4	119508052	4:119444161:C:T	Chr4	119444161	T	C	0.231061	-0.35509	1.10567e-08
ENSBTAG00000024157	DYNC2I1	Chr4	119527578	4:119502196:T:A	Chr4	119502196	A	T	0.498106	0.335322	6.82395e-09
ENSBTAG00000037649	VIPR2	Chr4	119695643	4:119786841:C:T	Chr4	119786841	C	T	0.267045	-0.390039	7.16736e-13
ENSBTAG00000052417	THAP2	Chr5	1293927	5:1330139:C:CA	Chr5	1330139	C	CA	0.19697	0.339744	5.25403e-05
ENSBTAG00000012272	TMEM19	Chr5	1319438	5:1330139:C:CA	Chr5	1330139	C	CA	0.19697	0.56237	1.29133e-24
ENSBTAG00000012828	TBC1D15	Chr5	1450099	5:1460860:GT:G	Chr5	1460860	G	GT	0.295455	0.234447	5.3027e-06
ENSBTAG00000035083	ATXN7L3B	Chr5	4068536	5:4030813:C:G	Chr5	4030813	C	G	0.0965909	0.340406	1.23533e-07
ENSBTAG00000014859	CAPS2	Chr5	4796635	5:4927515:C:T	Chr5	4927515	C	T	0.251894	0.799427	1.57715e-12
ENSBTAG00000011590	GLIPR1	Chr5	4987629	5:5705236:A:G	Chr5	5705236	G	A	0.348485	-0.135858	0.000262443
ENSBTAG00000011591	KRR1	Chr5	5047918	5:5046375:C:T	Chr5	5046375	C	T	0.160985	-0.281688	2.87807e-11
ENSBTAG00000004427	OSBPL8	Chr5	6001503	5:5947505:T:C	Chr5	5947505	C	T	0.208333	-0.219772	1.21567e-10
ENSBTAG00000009852	NAV3	Chr5	7300923	5:7690916:C:A	Chr5	7690916	C	A	0.335227	-0.113352	0.00476703
ENSBTAG00000014609	PPP1R12A	Chr5	9477553	5:9029509:T:C	Chr5	9029509	C	T	0.342803	-0.15558	0.000936193
ENSBTAG00000018694	ACSS3	Chr5	10671184	5:10781919:TAC:T	Chr5	10781919	TAC	T	0.179924	0.194052	2.13399e-07
ENSBTAG00000036282	CCDC59	Chr5	11909172	5:11831717:C:A	Chr5	11831717	C	A	0.193182	0.172284	0.00689101
ENSBTAG00000002888	TMTC2	Chr5	12219075	5:12277113:C:A	Chr5	12277113	C	A	0.157197	0.309095	0.00250183
ENSBTAG00000018743	C5H12orf29	Chr5	17826549	5:18190273:G:A	Chr5	18190273	G	A	0.123106	0.21248	0.000646387
ENSBTAG00000000687	POC1B	Chr5	19400057	5:19288678:CA:C	Chr5	19288678	CA	C	0.388258	-0.182125	1.05433e-05
ENSBTAG00000020330	BTG1	Chr5	22016602	5:21972998:T:C	Chr5	21972998	C	T	0.445076	0.197108	0.0203676
ENSBTAG00000000818	PLEKHG7	Chr5	22559006	5:22559059:G:T	Chr5	22559059	G	T	0.462121	-0.568822	1.58569e-26
ENSBTAG00000000421	EEA1	Chr5	22777435	5:22649792:A:G	Chr5	22649792	A	G	0.448864	0.233695	3.29553e-10
ENSBTAG00000007447	NUDT4	Chr5	23191703	5:22978242:G:A	Chr5	22978242	A	G	0.386364	0.273573	8.21957e-08
ENSBTAG00000021767	UBE2N	Chr5	23255510	5:23232243:G:GA	Chr5	23232243	G	GA	0.412879	0.183229	1.43295e-11
ENSBTAG00000012007	SOCS2	Chr5	23367713	5:23598312:A:G	Chr5	23598312	A	G	0.412879	0.200526	0.0108949
ENSBTAG00000011245	PLXNC1	Chr5	23915776	5:23922366:T:TA	Chr5	23922366	T	TA	0.388258	0.0972104	2.04147e-07
ENSBTAG00000052916	NA	Chr5	24067010	5:24267764:A:G	Chr5	24267764	A	G	0.0700758	0.216591	2.16983e-08
ENSBTAG00000004484	CEP83	Chr5	24345243	5:24215679:G:A	Chr5	24215679	G	A	0.42803	0.322251	1.2832e-09
ENSBTAG00000014375	TMCC3	Chr5	24595494	5:24615701:A:C	Chr5	24615701	A	C	0.287879	0.366088	2.53675e-09
ENSBTAG00000017729	NR2C1	Chr5	24760106	5:24758683:G:C	Chr5	24758683	G	C	0.0625	0.385116	0.0186575
ENSBTAG00000014030	FGD6	Chr5	24868854	5:24999093:G:T	Chr5	24999093	G	T	0.465909	0.395915	4.14705e-22
ENSBTAG00000014044	VEZT	Chr5	24868909	5:24973576:C:A	Chr5	24973576	A	C	0.496212	-0.192138	2.21697e-05
ENSBTAG00000019686	NCKAP1L	Chr5	25592783	5:25541835:A:C	Chr5	25541835	A	C	0.282197	-0.232385	7.07891e-09
ENSBTAG00000015592	GPR84	Chr5	25709928	5:25452140:C:T	Chr5	25452140	C	T	0.202652	0.284774	1.90881e-05
ENSBTAG00000005384	COPZ1	Chr5	25742083	5:25637289:C:T	Chr5	25637289	C	T	0.333333	-0.128139	0.00343194
ENSBTAG00000006246	CBX5	Chr5	25786250	5:25811561:C:T	Chr5	25811561	C	T	0.435606	0.312539	7.69113e-09
ENSBTAG00000021974	SMUG1	Chr5	25855723	5:26155478:T:TA	Chr5	26155478	TA	T	0.363636	-0.29348	5.57116e-08
ENSBTAG00000000435	TARBP2	Chr5	26524457	5:27442660:CA:C	Chr5	27442660	CA	C	0.270833	0.119644	0.00852746
ENSBTAG00000026916	PRR13	Chr5	26571613	5:26521915:A:G	Chr5	26521915	G	A	0.450758	-0.534394	8.90237e-13
ENSBTAG00000008935	PFDN5	Chr5	26729058	5:26699452:C:T	Chr5	26699452	C	T	0.481061	-0.261204	4.99088e-15
ENSBTAG00000008933	MFSD5	Chr5	26760156	5:26690935:TC:T	Chr5	26690935	TC	T	0.469697	-0.147046	0.000467212
ENSBTAG00000007592	RARG	Chr5	26774194	5:26596278:C:G	Chr5	26596278	C	G	0.159091	0.190342	0.000268512
ENSBTAG00000046481	ZNF740	Chr5	26820606	5:26819766:G:A	Chr5	26819766	G	A	0.217803	-0.426643	9.6961e-07
ENSBTAG00000007829	CSAD	Chr5	26821654	5:27772232:G:C	Chr5	27772232	G	C	0.121212	-0.448621	0.00388781
ENSBTAG00000021464	SPRYD3	Chr5	26888288	5:27145073:C:T	Chr5	27145073	C	T	0.142045	-0.19733	0.000301142
ENSBTAG00000006904	TNS2	Chr5	26921895	5:26857084:A:G	Chr5	26857084	A	G	0.223485	-0.352738	1.73912e-07
ENSBTAG00000006883	EIF4B	Chr5	26949409	5:27002654:A:C	Chr5	27002654	C	A	0.471591	0.0945074	7.78426e-12
ENSBTAG00000007904	KRT72	Chr5	27289800	5:28045952:C:T	Chr5	28045952	C	T	0.462121	-0.139989	0.0266371
ENSBTAG00000000510	ATG101	Chr5	27814034	5:27809196:G:A	Chr5	27809196	G	A	0.484848	0.123985	0.000726667
ENSBTAG00000000507	NR4A1	Chr5	27839685	5:28257283:A:G	Chr5	28257283	A	G	0.0795455	0.404258	0.0189009
ENSBTAG00000021658	TAMALIN	Chr5	27873793	5:27883652:C:T	Chr5	27883652	C	T	0.119318	-0.549055	0.0120144
ENSBTAG00000013843	ACVRL1	Chr5	27957768	5:28417890:G:C	Chr5	28417890	G	C	0.392045	-0.112805	0.00113011
ENSBTAG00000017950	SLC4A8	Chr5	28382599	5:28382814:AT:A	Chr5	28382814	AT	A	0.378788	-0.406598	1.98974e-11
ENSBTAG00000017943	GALNT6	Chr5	28415109	5:28240670:T:A	Chr5	28240670	T	A	0.125	-0.293253	0.0144546
ENSBTAG00000008900	CELA1	Chr5	28460088	5:28443018:A:G	Chr5	28443018	A	G	0.352273	-0.597067	9.8635e-15
ENSBTAG00000008897	BIN2	Chr5	28477746	5:28536028:G:A	Chr5	28536028	G	A	0.189394	-0.439077	2.92485e-11
ENSBTAG00000001983	SMAGP	Chr5	28521681	5:28466540:G:A	Chr5	28466540	G	A	0.0587121	-0.397005	0.00127232
ENSBTAG00000004349	DAZAP2	Chr5	28552009	5:28540072:G:A	Chr5	28540072	G	A	0.0890151	0.172465	0.000738166
ENSBTAG00000051039	NA	Chr5	28594349	5:29382891:A:C	Chr5	29382891	C	A	0.0492424	-0.531041	0.00124908
ENSBTAG00000019312	TFCP2	Chr5	28610715	5:28684796:GAACC:G	Chr5	28684796	G	GAACC	0.410985	0.228525	9.17426e-15
ENSBTAG00000032914	SLC11A2	Chr5	28723263	5:28753327:GAA:G	Chr5	28753327	G	GAA	0.445076	0.15208	4.22806e-08
ENSBTAG00000032902	NA	Chr5	28846447	5:28568432:G:A	Chr5	28568432	G	A	0.138258	5.1481e-07	1.09029e-18
ENSBTAG00000025005	METTL7A	Chr5	29007097	5:28996020:T:C	Chr5	28996020	T	C	0.375	-0.244851	3.58103e-30
ENSBTAG00000018131	ATF1	Chr5	29171842	5:29047790:G:A	Chr5	29047790	G	A	0.441288	0.115617	0.00962243
ENSBTAG00000005246	DIP2B	Chr5	29412313	5:29249171:C:A	Chr5	29249171	C	A	0.481061	-0.267546	1.52853e-09
ENSBTAG00000017164	LARP4	Chr5	29503457	5:29503238:G:A	Chr5	29503238	G	A	0.193182	0.125446	2.93923e-10
ENSBTAG00000012342	LIMA1	Chr5	29637177	5:30312746:A:G	Chr5	30312746	G	A	0.193182	0.170567	0.0179792
ENSBTAG00000000808	COX14	Chr5	29787103	5:29939981:G:C	Chr5	29939981	G	C	0.314394	-0.233538	5.87211e-05
ENSBTAG00000016296	GPD1	Chr5	29795178	5:30109541:C:T	Chr5	30109541	C	T	0.388258	-0.159852	0.000179603
ENSBTAG00000037935	SMARCD1	Chr5	29810207	5:30763428:C:T	Chr5	30763428	C	T	0.126894	0.510126	0.00355392
ENSBTAG00000012784	RACGAP1	Chr5	29851714	5:29825152:A:C	Chr5	29825152	C	A	0.164773	-0.213815	3.06074e-17
ENSBTAG00000017504	FAIM2	Chr5	29983973	5:30151495:C:T	Chr5	30151495	C	T	0.208333	-0.247327	0.000271711
ENSBTAG00000018588	TMBIM6	Chr5	30128722	5:30977905:GTA:G	Chr5	30977905	G	GTA	0.452652	-0.0694418	0.0103175
ENSBTAG00000016593	FMNL3	Chr5	30151295	5:30138656:T:C	Chr5	30138656	T	C	0.42803	0.124825	0.0135109
ENSBTAG00000019281	MCRS1	Chr5	30264980	5:30243708:G:A	Chr5	30243708	G	A	0.401515	0.151735	0.00343008
ENSBTAG00000004660	SPATS2	Chr5	30378369	5:30365034:T:C	Chr5	30365034	T	C	0.376894	-0.131414	2.96106e-07
ENSBTAG00000037775	NA	Chr5	30548298	5:30673689:G:A	Chr5	30673689	A	G	0.219697	-0.727025	6.25766e-14
ENSBTAG00000039992	TUBA1C	Chr5	30572546	5:30632550:G:T	Chr5	30632550	G	T	0.145833	-0.514286	0.00117677
ENSBTAG00000001489	TUBA1A	Chr5	30656036	5:30486967:G:A	Chr5	30486967	A	G	0.304924	-0.32238	0.00179841
ENSBTAG00000012244	TUBA1B	Chr5	30699221	5:30610476:G:C	Chr5	30610476	G	C	0.261364	-0.131569	5.13684e-07
ENSBTAG00000044048	LMBR1L	Chr5	30713731	5:30816937:CTCCCTGATGA:C	Chr5	30816937	CTCCCTGATGA	C	0.0587121	0.492766	2.97625e-10
ENSBTAG00000051755	ARF3	Chr5	30855680	5:30798519:A:AT	Chr5	30798519	A	AT	0.0549242	0.263999	7.58134e-06
ENSBTAG00000021808	CACNB3	Chr5	30962180	5:31109022:C:T	Chr5	31109022	T	C	0.392045	-0.292707	2.6331e-29
ENSBTAG00000042536	SNORA2C	Chr5	31116772	5:31116777:C:T	Chr5	31116777	C	T	0.0492424	0.805629	2.60229e-09
ENSBTAG00000002390	CCDC184	Chr5	32111603	5:32100751:C:A	Chr5	32100751	C	A	0.443182	-0.259718	0.0199547
ENSBTAG00000000289	ASB8	Chr5	32135754	5:31328309:T:G	Chr5	31328309	G	T	0.441288	-0.199032	0.00330501
ENSBTAG00000012423	SENP1	Chr5	32190515	5:31379924:T:A	Chr5	31379924	A	T	0.295455	-0.23741	0.000107081
ENSBTAG00000000454	TMEM106C	Chr5	32323859	5:32323774:C:G	Chr5	32323774	C	G	0.15019	-0.621381	1.49071e-30
ENSBTAG00000016414	VDR	Chr5	32376366	5:32406408:C:T	Chr5	32406408	C	T	0.0416667	-0.356785	0.000735283
ENSBTAG00000006828	RAPGEF3	Chr5	32528577	5:32607910:T:C	Chr5	32607910	C	T	0.357955	-0.181664	0.0120429
ENSBTAG00000018690	RPAP3	Chr5	32579245	5:32567676:G:GA	Chr5	32567676	G	GA	0.352273	-0.272362	3.86543e-09
ENSBTAG00000002025	AMIGO2	Chr5	33169557	5:33377281:A:T	Chr5	33377281	A	T	0.191288	0.195737	1.39553e-20
ENSBTAG00000011838	PCED1B	Chr5	33169810	5:33029612:ATCCACG:A	Chr5	33029612	ATCCACG	A	0.267045	0.314588	2.42991e-16
ENSBTAG00000000859	SLC38A1	Chr5	33940565	5:33929166:T:C	Chr5	33929166	T	C	0.494318	0.211324	8.53638e-11
ENSBTAG00000011087	ARID2	Chr5	34518431	5:34539660:A:G	Chr5	34539660	G	A	0.185606	-0.208542	2.91398e-06
ENSBTAG00000002902	ANO6	Chr5	35016323	5:35036651:G:A	Chr5	35036651	A	G	0.460227	0.224844	4.09443e-09
ENSBTAG00000032183	NELL2	Chr5	35475235	5:35373539:T:C	Chr5	35373539	T	C	0.102273	0.178751	0.0192867
ENSBTAG00000020938	TWF1	Chr5	36650632	5:37402570:TGG:T	Chr5	37402570	TGG	T	0.159091	0.241726	9.39848e-05
ENSBTAG00000021105	IRAK4	Chr5	36708918	5:37617874:CA:C	Chr5	37617874	CA	C	0.032197	-0.543537	1.91302e-14
ENSBTAG00000004718	PUS7L	Chr5	36712230	5:37579843:T:G	Chr5	37579843	G	T	0.482955	-0.178808	0.000541352
ENSBTAG00000008596	PRICKLE1	Chr5	38058248	5:37733045:T:G	Chr5	37733045	G	T	0.464015	-0.332625	2.35997e-06
ENSBTAG00000043962	SLC2A13	Chr5	40812849	5:40795037:TAAAATGTC:T	Chr5	40795037	TAAAATGTC	T	0.337121	-0.335553	3.16562e-08
ENSBTAG00000015311	PTPRR	Chr5	42611539	5:42593218:T:C	Chr5	42593218	T	C	0.361742	-0.226317	4.2996e-07
ENSBTAG00000015296	PTPRB	Chr5	42885406	5:42402929:T:A	Chr5	42402929	T	A	0.448864	-0.220824	0.0063499
ENSBTAG00000003748	CNOT2	Chr5	43266434	5:43267096:A:G	Chr5	43267096	A	G	0.130682	0.400155	2.13174e-06
ENSBTAG00000002256	YEATS4	Chr5	44110850	5:43229286:T:C	Chr5	43229286	T	C	0.159091	-0.148685	0.00418561
ENSBTAG00000026088	LYZ2	Chr5	44371561	5:44495371:C:T	Chr5	44495371	C	T	0.257576	0.497484	9.01383e-08
ENSBTAG00000026779	LYZ	Chr5	44515796	5:44495371:C:T	Chr5	44495371	C	T	0.257576	0.274005	8.00975e-17
ENSBTAG00000013496	CPM	Chr5	44876589	5:44843183:T:C	Chr5	44843183	C	T	0.433712	0.389517	1.42132e-26
ENSBTAG00000010422	MDM2	Chr5	45005325	5:45244052:A:G	Chr5	45244052	A	G	0.308712	0.109447	2.55701e-05
ENSBTAG00000031919	SLC35E3	Chr5	45065127	5:45046982:T:C	Chr5	45046982	T	C	0.469697	-0.194825	5.03126e-19
ENSBTAG00000006911	NUP107	Chr5	45125506	5:45135884:AT:A	Chr5	45135884	A	AT	0.492424	0.25276	6.72886e-11
ENSBTAG00000008967	RAP1B	Chr5	45200873	5:45488098:A:G	Chr5	45488098	A	G	0.217803	-0.210213	3.63043e-05
ENSBTAG00000019738	MDM1	Chr5	45446654	5:45548216:G:T	Chr5	45548216	G	T	0.179924	0.532289	1.10012e-06
ENSBTAG00000007256	DYRK2	Chr5	46131988	5:46716794:C:T	Chr5	46716794	C	T	0.403409	0.110509	0.00378941
ENSBTAG00000020806	HELB	Chr5	47519482	5:47521765:T:A	Chr5	47521765	T	A	0.475379	0.238326	2.50299e-19
ENSBTAG00000002004	LLPH	Chr5	47669191	5:47633463:GCTT:G	Chr5	47633463	GCTT	G	0.0909091	0.591029	7.87502e-10
ENSBTAG00000044017	MSRB3	Chr5	48512740	5:48780326:C:G	Chr5	48780326	C	G	0.429924	0.182404	0.0260847
ENSBTAG00000039435	LEMD3	Chr5	48614389	5:48575910:T:TA	Chr5	48575910	T	TA	0.263258	-0.317251	6.12098e-11
ENSBTAG00000011352	TBC1D30	Chr5	49035846	5:49035604:C:T	Chr5	49035604	C	T	0.289773	0.275697	2.31595e-09
ENSBTAG00000017465	GNS	Chr5	49053813	5:49474243:T:G	Chr5	49474243	G	T	0.486742	-0.167038	0.0169197
ENSBTAG00000051013	RASSF3	Chr5	49190776	5:49202975:T:C	Chr5	49202975	T	C	0.293561	-0.081382	0.00468929
ENSBTAG00000017401	TBK1	Chr5	49315761	5:48417211:T:G	Chr5	48417211	G	T	0.401515	-0.0774863	0.0255308
ENSBTAG00000026962	XPOT	Chr5	49468018	5:49358340:T:TA	Chr5	49358340	T	TA	0.13447	0.22672	1.7063e-11
ENSBTAG00000004753	RXYLT1	Chr5	49945730	5:49987085:C:T	Chr5	49987085	T	C	0.299242	0.519914	6.09047e-10
ENSBTAG00000011857	PPM1H	Chr5	50634074	5:50794941:A:G	Chr5	50794941	A	G	0.5	-0.0996246	0.000951544
ENSBTAG00000011068	MON2	Chr5	51105717	5:51076618:C:G	Chr5	51076618	C	G	0.350379	-0.209455	1.8644e-13
ENSBTAG00000010428	USP15	Chr5	51276079	5:51326403:A:AGATT	Chr5	51326403	A	AGATT	0.399621	0.117624	0.00285756
ENSBTAG00000021287	SLC16A7	Chr5	53892992	5:52915663:C:T	Chr5	52915663	T	C	0.373106	0.284423	0.00370196
ENSBTAG00000016508	CTDSP2	Chr5	55634356	5:55508058:A:G	Chr5	55508058	A	G	0.0435606	-0.243164	0.00537122
ENSBTAG00000029869	bta-mir-26a-2	Chr5	55652074	5:55240165:A:T	Chr5	55240165	A	T	0.0643939	-0.559521	0.0236778
ENSBTAG00000016908	METTL1	Chr5	55693580	5:55695114:G:A	Chr5	55695114	G	A	0.0681818	-0.66642	5.095e-06
ENSBTAG00000016910	EEF1AKMT3	Chr5	55699636	5:55566526:C:A	Chr5	55566526	A	C	0.183712	0.347074	0.0144653
ENSBTAG00000018002	DTX3	Chr5	55885193	5:54887835:A:G	Chr5	54887835	A	G	0.0416667	0.375467	0.000229471
ENSBTAG00000003942	PIP4K2C	Chr5	55898381	5:55692233:G:T	Chr5	55692233	T	G	0.339015	-0.156417	1.16983e-07
ENSBTAG00000018403	ARHGAP9	Chr5	55984864	5:55997206:A:T	Chr5	55997206	T	A	0.1875	0.0993747	0.00266774
ENSBTAG00000031500	SHMT2	Chr5	56213412	5:56229411:G:A	Chr5	56229411	G	A	0.106061	0.212286	1.06204e-05
ENSBTAG00000010830	LRP1	Chr5	56310118	5:56470982:A:G	Chr5	56470982	G	A	0.36553	-0.0773422	0.00774773
ENSBTAG00000006335	STAT6	Chr5	56325610	5:56327576:AG:A	Chr5	56327576	AG	A	0.0492424	0.3623	6.65313e-10
ENSBTAG00000006324	NAB2	Chr5	56346527	5:56366420:T:G	Chr5	56366420	T	G	0.0625	-0.181812	0.00143706
ENSBTAG00000014659	NEMP1	Chr5	56356650	5:56389940:C:G	Chr5	56389940	C	G	0.388258	-0.123442	1.71e-05
ENSBTAG00000014655	MYO1A	Chr5	56378742	5:56376098:T:C	Chr5	56376098	T	C	0.107955	-0.47972	5.10472e-21
ENSBTAG00000021807	TAC3	Chr5	56410875	5:56367150:C:T	Chr5	56367150	C	T	0.0625	-0.703812	1.23675e-11
ENSBTAG00000017840	BAZ2A	Chr5	56796776	5:56763011:A:G	Chr5	56763011	G	A	0.467803	0.11551	8.28827e-05
ENSBTAG00000009284	GLS2	Chr5	56910795	5:56924130:C:CAG	Chr5	56924130	C	CAG	0.471591	-0.172144	0.0150943
ENSBTAG00000020459	TIMELESS	Chr5	56937140	5:56939050:G:C	Chr5	56939050	G	C	0.0700758	-0.390583	6.27322e-11
ENSBTAG00000004380	STAT2	Chr5	56997912	5:56904929:AT:A	Chr5	56904929	A	AT	0.486742	-0.132648	6.69689e-05
ENSBTAG00000004371	CS	Chr5	57042172	5:57047701:G:T	Chr5	57047701	G	T	0.339015	0.19797	1.02751e-12
ENSBTAG00000011762	ANKRD52	Chr5	57074996	5:56193316:AC:A	Chr5	56193316	AC	A	0.157197	0.174578	0.0182141
ENSBTAG00000014697	SMARCC2	Chr5	57140988	5:57578263:C:T	Chr5	57578263	C	T	0.119318	-0.16165	5.24226e-05
ENSBTAG00000010799	MYL6	Chr5	57164985	5:57606106:T:A	Chr5	57606106	T	A	0.274621	0.114349	0.0129915
ENSBTAG00000031217	MYL6B	Chr5	57168025	5:57378367:G:A	Chr5	57378367	G	A	0.270833	-0.448404	0.00528813
ENSBTAG00000009543	ESYT1	Chr5	57194004	5:57169172:C:CA	Chr5	57169172	C	CA	0.263258	0.0626735	1.32535e-05
ENSBTAG00000014129	RAB5B	Chr5	57337350	5:57358938:C:G	Chr5	57358938	C	G	0.157197	0.253119	0.00252058
ENSBTAG00000004021	CDK2	Chr5	57344446	5:57179876:G:A	Chr5	57179876	G	A	0.113636	0.167095	0.0232808
ENSBTAG00000004018	DGKA	Chr5	57376105	5:57398136:T:G	Chr5	57398136	G	T	0.325758	0.113797	0.0090366
ENSBTAG00000009051	MMP19	Chr5	57426769	5:57437925:T:G	Chr5	57437925	T	G	0.054902	0.129697	4.15468e-05
ENSBTAG00000009049	NA	Chr5	57437847	5:58161730:G:GA	Chr5	58161730	G	GA	0.401515	-0.269921	2.2549e-05
ENSBTAG00000005120	TESPA1	Chr5	59925025	5:59923402:G:T	Chr5	59923402	T	G	0.287879	0.121132	0.0022544
ENSBTAG00000003183	NTN4	Chr5	60161682	5:60085970:A:G	Chr5	60085970	A	G	0.1875	0.463666	5.75006e-05
ENSBTAG00000016275	AMDHD1	Chr5	60255972	5:60219768:G:A	Chr5	60219768	A	G	0.441288	0.32795	1.09198e-15
ENSBTAG00000016276	HAL	Chr5	60299590	5:60318398:G:GA	Chr5	60318398	G	GA	0.185606	0.372183	6.39442e-06
ENSBTAG00000016415	LTA4H	Chr5	60336225	5:60283629:T:A	Chr5	60283629	T	A	0.140152	0.342631	3.79201e-14
ENSBTAG00000001509	ELK3	Chr5	60480236	5:60286844:C:G	Chr5	60286844	G	C	0.25	-0.221715	0.0245719
ENSBTAG00000001510	CDK17	Chr5	60664570	5:61279290:T:G	Chr5	61279290	G	T	0.363636	0.0875041	0.015234
ENSBTAG00000002251	NA	Chr5	60753107	5:60755854:G:C	Chr5	60755854	C	G	0.416667	-0.12732	0.00181044
ENSBTAG00000052520	NA	Chr5	60792489	5:61271254:C:T	Chr5	61271254	T	C	0.465909	0.177207	0.000197945
ENSBTAG00000015792	CFAP54	Chr5	60796780	5:60501579:A:G	Chr5	60501579	G	A	0.221591	-0.205653	2.41524e-06
ENSBTAG00000001894	NEDD1	Chr5	61105020	5:61105092:G:C	Chr5	61105092	C	G	0.225379	0.289358	3.89773e-09
ENSBTAG00000021660	IKBIP	Chr5	62781346	5:63055877:C:G	Chr5	63055877	C	G	0.426136	0.20256	8.42364e-06
ENSBTAG00000030994	NA	Chr5	63318266	5:62984335:T:C	Chr5	62984335	T	C	0.278409	-0.190898	5.23441e-06
ENSBTAG00000006040	UHRF1BP1L	Chr5	64165062	5:64152659:A:T	Chr5	64152659	A	T	0.25947	-0.134529	2.49122e-07
ENSBTAG00000013842	ACTR6	Chr5	64170246	5:64095723:A:G	Chr5	64095723	A	G	0.253788	-0.157285	0.0228314
ENSBTAG00000013859	SCYL2	Chr5	64220437	5:64392911:AAG:A	Chr5	64392911	AAG	A	0.297348	0.198315	5.15695e-06
ENSBTAG00000049308	GAS2L3	Chr5	64482720	5:63645467:C:T	Chr5	63645467	C	T	0.409091	-0.268674	0.0086952
ENSBTAG00000003239	UTP20	Chr5	65183369	5:65229759:T:C	Chr5	65229759	T	C	0.274621	-0.360862	5.2158e-15
ENSBTAG00000002490	CHPT1	Chr5	65511776	5:65547950:G:C	Chr5	65547950	C	G	0.441288	-0.12436	9.33775e-15
ENSBTAG00000019409	GNPTAB	Chr5	65655965	5:65563217:G:A	Chr5	65563217	A	G	0.431818	0.158626	1.21389e-12
ENSBTAG00000000021	WASHC3	Chr5	65886932	5:65855276:T:C	Chr5	65855276	T	C	0.0340909	-0.332679	0.00503254
ENSBTAG00000000022	NUP37	Chr5	65952780	5:66112117:C:T	Chr5	66112117	C	T	0.270833	-0.261024	0.00176473
ENSBTAG00000039709	PARPBP	Chr5	65952797	5:65873297:T:C	Chr5	65873297	T	C	0.210227	-0.227982	2.90026e-06
ENSBTAG00000006013	NT5DC3	Chr5	67511409	5:68246966:G:A	Chr5	68246966	G	A	0.164773	-0.53217	2.74616e-08
ENSBTAG00000048280	C5H12orf73	Chr5	67626496	5:67553882:T:TG	Chr5	67553882	TG	T	0.140152	0.23351	2.93242e-13
ENSBTAG00000013912	TXNRD1	Chr5	67898939	5:67870972:C:G	Chr5	67870972	C	G	0.255682	-0.170376	1.54248e-06
ENSBTAG00000010644	CHST11	Chr5	68044448	5:68224757:A:AT	Chr5	68224757	A	AT	0.236742	0.206004	6.83278e-06
ENSBTAG00000021875	SLC41A2	Chr5	68504478	5:68520999:C:T	Chr5	68520999	T	C	0.441288	-0.175421	0.00153895
ENSBTAG00000021196	NOPCHAP1	Chr5	68528022	5:68522195:C:T	Chr5	68522195	C	T	0.316288	-0.165157	5.47135e-17
ENSBTAG00000033735	WASHC4	Chr5	68640525	5:68849926:G:A	Chr5	68849926	G	A	0.181818	0.165856	0.000275635
ENSBTAG00000050973	NA	Chr5	68823082	5:68854421:G:A	Chr5	68854421	A	G	0.136364	0.28897	1.78485e-10
ENSBTAG00000011913	CKAP4	Chr5	69639265	5:69617717:C:T	Chr5	69617717	C	T	0.431818	-0.0684634	5.76669e-09
ENSBTAG00000002127	TCP11L2	Chr5	69672952	5:69618277:T:C	Chr5	69618277	T	C	0.354167	0.114577	0.00737697
ENSBTAG00000053105	TMEM263	Chr5	70229100	5:70234381:T:C	Chr5	70234381	T	C	0.0208333	-0.467639	0.00882822
ENSBTAG00000010144	MTERF2	Chr5	70257832	5:70295721:GA:G	Chr5	70295721	GA	G	0.13447	0.49008	7.81267e-07
ENSBTAG00000010149	CRY1	Chr5	70355222	5:70526468:T:C	Chr5	70526468	T	C	0.119318	0.28461	0.000115975
ENSBTAG00000027064	BTBD11	Chr5	70577673	5:70654139:T:TC	Chr5	70654139	T	TC	0.454545	-0.220883	1.88561e-06
ENSBTAG00000004654	PWP1	Chr5	70931733	5:70996080:T:C	Chr5	70996080	C	T	0.117424	0.346658	3.20963e-11
ENSBTAG00000011070	RTCB	Chr5	71038972	5:71353867:G:C	Chr5	71353867	G	C	0.231061	0.258752	8.7602e-07
ENSBTAG00000020634	FBXO7	Chr5	71099854	5:71080828:T:C	Chr5	71080828	T	C	0.285985	-0.225583	1.12286e-07
ENSBTAG00000020638	TIMP3	Chr5	71388891	5:71518038:G:A	Chr5	71518038	G	A	0.342803	-0.206772	0.000256799
ENSBTAG00000021953	LARGE1	Chr5	72364695	5:73039603:C:G	Chr5	73039603	C	G	0.126894	-0.133864	1.04986e-06
ENSBTAG00000010533	HMGXB4	Chr5	73508917	5:72808844:A:G	Chr5	72808844	G	A	0.170455	0.290095	0.012842
ENSBTAG00000017116	RASD2	Chr5	73749046	5:73756634:G:A	Chr5	73756634	A	G	0.439394	-0.171812	9.82494e-16
ENSBTAG00000046392	NA	Chr5	74266330	5:74212916:ACACG:A	Chr5	74212916	ACACG	A	0.371212	0.381986	1.95936e-07
ENSBTAG00000049297	NA	Chr5	74275837	5:74228431:C:A	Chr5	74228431	A	C	0.426136	-0.110783	1.04923e-34
ENSBTAG00000037799	NA	Chr5	74303468	5:73425187:A:C	Chr5	73425187	A	C	0.42803	-0.197635	1.40982e-09
ENSBTAG00000052884	NA	Chr5	74349227	5:74411083:C:A	Chr5	74411083	C	A	0.232955	-0.210798	2.89154e-10
ENSBTAG00000053500	NA	Chr5	74435609	5:74610264:C:T	Chr5	74610264	C	T	0.24053	0.351811	3.63275e-12
ENSBTAG00000048740	NA	Chr5	74452245	5:74661079:TG:T	Chr5	74661079	T	TG	0.320076	0.24288	3.60469e-07
ENSBTAG00000053144	NA	Chr5	74463537	5:74623881:A:ATT	Chr5	74623881	A	ATT	0.206439	5.48211e-07	9.14029e-18
ENSBTAG00000050417	NA	Chr5	74487043	5:74475331:T:TC	Chr5	74475331	T	TC	0.323864	-0.176187	8.40898e-14
ENSBTAG00000038652	NA	Chr5	74561456	5:74749320:G:A	Chr5	74749320	G	A	0.212121	-0.489464	5.9164e-11
ENSBTAG00000039524	NA	Chr5	74571162	5:74635060:TA:T	Chr5	74635060	TA	T	0.195076	0.304042	1.51481e-28
ENSBTAG00000040244	APOL3	Chr5	74600518	5:74516629:A:C	Chr5	74516629	A	C	0.280303	-0.301369	3.3757e-17
ENSBTAG00000012192	NA	Chr5	74628935	5:75615999:A:C	Chr5	75615999	A	C	0.0454545	-1.22083	0.00864232
ENSBTAG00000000667	APOL3	Chr5	74694652	5:74677618:T:A	Chr5	74677618	T	A	0.268939	0.340539	0.000106099
ENSBTAG00000010402	MYH9	Chr5	74805905	5:74768032:A:G	Chr5	74768032	G	A	0.464015	0.180006	2.35465e-22
ENSBTAG00000000014	TXN2	Chr5	74893752	5:74613683:G:GA	Chr5	74613683	G	GA	0.0776515	0.384352	3.40043e-07
ENSBTAG00000000015	FOXRED2	Chr5	74919112	5:75014869:C:T	Chr5	75014869	C	T	0.166667	-0.251746	0.00108893
ENSBTAG00000001988	EIF3D	Chr5	74939376	5:75005110:G:A	Chr5	75005110	A	G	0.238636	-0.2435	1.00658e-11
ENSBTAG00000026657	IFT27	Chr5	75158505	5:75130412:T:A	Chr5	75130412	T	A	0.24053	0.192813	6.65262e-10
ENSBTAG00000048453	NA	Chr5	75159265	5:75230314:A:G	Chr5	75230314	A	G	0.223485	-0.358763	0.0109655
ENSBTAG00000007531	NCF4	Chr5	75265853	5:75360435:C:CA	Chr5	75360435	C	CA	0.423954	-0.172134	5.73571e-11
ENSBTAG00000009064	CSF2RB	Chr5	75349089	5:75360449:C:G	Chr5	75360449	C	G	0.405303	0.145721	7.81663e-15
ENSBTAG00000030648	MPST	Chr5	75441889	5:75234014:GACTGA:G	Chr5	75234014	GACTGA	G	0.369318	-0.153246	9.64021e-13
ENSBTAG00000030650	TST	Chr5	75442678	5:75611545:C:T	Chr5	75611545	T	C	0.0757576	-1.10868	6.2745e-13
ENSBTAG00000016345	IL2RB	Chr5	75591439	5:75565448:A:G	Chr5	75565448	A	G	0.0757576	0.295963	0.0110163
ENSBTAG00000011043	RAC2	Chr5	75673313	5:75619558:C:T	Chr5	75619558	C	T	0.109848	-0.126692	1.41387e-11
ENSBTAG00000015043	MFNG	Chr5	75903492	5:75901650:C:A	Chr5	75901650	C	A	0.307692	0.118069	3.47596e-07
ENSBTAG00000016661	USP18	Chr5	75988787	5:75673469:T:G	Chr5	75673469	T	G	0.263258	0.285746	0.0119486
ENSBTAG00000030632	ALG10	Chr5	76113238	5:75497714:G:A	Chr5	75497714	G	A	0.214015	-0.240786	7.14927e-12
ENSBTAG00000002651	PKP2	Chr5	77001512	5:77000696:G:A	Chr5	77000696	A	G	0.0700758	0.3659	3.58239e-10
ENSBTAG00000011399	YARS2	Chr5	77131743	5:77206481:C:T	Chr5	77206481	C	T	0.143939	0.423631	4.31255e-05
ENSBTAG00000011395	DNM1L	Chr5	77205083	5:77136886:C:T	Chr5	77136886	C	T	0.164773	0.214434	2.4412e-19
ENSBTAG00000005453	FGD4	Chr5	77463105	5:77409997:G:C	Chr5	77409997	C	G	0.410985	-0.185328	1.37451e-08
ENSBTAG00000000877	ETFBKMT	Chr5	78279920	5:78280203:A:G	Chr5	78280203	G	A	0.229167	2.96435e-07	7.55402e-12
ENSBTAG00000020315	DENND5B	Chr5	78374552	5:78574810:G:GA	Chr5	78574810	G	GA	0.263258	-0.179359	0.00105565
ENSBTAG00000019373	CAPRIN2	Chr5	78798260	5:78262133:C:CA	Chr5	78262133	C	CA	0.102273	-0.592055	3.33369e-08
ENSBTAG00000014106	IPO8	Chr5	78855489	5:78856754:G:T	Chr5	78856754	G	T	0.407197	0.220419	2.07669e-15
ENSBTAG00000005370	TMTC1	Chr5	79807658	5:79808529:C:T	Chr5	79808529	C	T	0.32197	-0.38199	5.27674e-06
ENSBTAG00000011096	ERGIC2	Chr5	80232323	5:79261585:C:T	Chr5	79261585	C	T	0.0378788	-0.305645	0.0113471
ENSBTAG00000011095	FAR2	Chr5	80337660	5:80622618:C:T	Chr5	80622618	C	T	0.032197	-0.401054	0.0170576
ENSBTAG00000012448	CCDC91	Chr5	81592476	5:81538434:A:T	Chr5	81538434	T	A	0.395833	0.164811	1.70488e-14
ENSBTAG00000006372	KLHL42	Chr5	82063595	5:82062362:C:CA	Chr5	82062362	CA	C	0.323864	-0.39878	0.000709723
ENSBTAG00000006369	MRPS35	Chr5	82125299	5:82106856:TATA:T	Chr5	82106856	TATA	T	0.172348	-0.712695	5.59786e-24
ENSBTAG00000022083	REP15	Chr5	82134596	5:82381244:A:G	Chr5	82381244	G	A	0.236742	0.39183	0.000617798
ENSBTAG00000004283	PPFIBP1	Chr5	82342855	5:82375727:C:A	Chr5	82375727	A	C	0.236742	3.41915e-07	1.11536e-12
ENSBTAG00000011798	STK38L	Chr5	82646675	5:82047933:C:A	Chr5	82047933	C	A	0.130682	0.124784	0.0158068
ENSBTAG00000005082	MED21	Chr5	82782365	5:82786687:G:A	Chr5	82786687	A	G	0.382576	-0.198948	0.000514543
ENSBTAG00000006985	TM7SF3	Chr5	82791611	5:83034509:A:G	Chr5	83034509	A	G	0.475379	0.280633	9.96379e-10
ENSBTAG00000013515	INTS13	Chr5	82866001	5:82939815:C:T	Chr5	82939815	C	T	0.329545	-0.274985	1.70522e-11
ENSBTAG00000030575	BHLHE41	Chr5	83818250	5:83913533:C:T	Chr5	83913533	C	T	0.214015	-0.139537	0.0193578
ENSBTAG00000021980	RASSF8	Chr5	83894327	5:83721490:G:A	Chr5	83721490	G	A	0.183712	0.405784	0.0224405
ENSBTAG00000009778	KRAS	Chr5	84749226	5:84721591:T:G	Chr5	84721591	T	G	0.498106	0.166053	0.0024198
ENSBTAG00000026624	ETFRF1	Chr5	84799340	5:84821840:A:G	Chr5	84821840	G	A	0.244318	-0.154052	0.00716516
ENSBTAG00000013825	BCAT1	Chr5	85057074	5:85062942:A:G	Chr5	85062942	G	A	0.356061	0.129602	7.64337e-06
ENSBTAG00000005833	ETNK1	Chr5	87610028	5:87674285:A:G	Chr5	87674285	A	G	0.244318	-0.30372	5.3695e-09
ENSBTAG00000010136	CMAS	Chr5	88170546	5:88111040:C:T	Chr5	88111040	C	T	0.0984849	0.377155	0.00221334
ENSBTAG00000019603	LDHB	Chr5	88544524	5:88564343:GT:G	Chr5	88564343	GT	G	0.0965909	-0.147699	0.00413405
ENSBTAG00000053951	SPX	Chr5	88673433	5:88800499:C:T	Chr5	88800499	C	T	0.0473485	-0.791627	0.0122335
ENSBTAG00000000379	GOLT1B	Chr5	88697403	5:89270113:TA:T	Chr5	89270113	TA	T	0.486742	0.208874	8.41746e-07
ENSBTAG00000021083	RECQL	Chr5	88697523	5:88712465:T:C	Chr5	88712465	T	C	0.0435606	-0.283782	0.000353802
ENSBTAG00000021078	PYROXD1	Chr5	88756498	5:88769283:TG:T	Chr5	88769283	T	TG	0.234848	-0.343186	1.4362e-16
ENSBTAG00000010818	AEBP2	Chr5	90530352	5:90375861:C:G	Chr5	90375861	C	G	0.331439	0.130887	1.82642e-05
ENSBTAG00000017571	PLEKHA5	Chr5	90862839	5:90814944:G:A	Chr5	90814944	G	A	0.429924	0.304974	2.4477e-09
ENSBTAG00000008541	MGST1	Chr5	93521047	5:93507153:C:A	Chr5	93507153	C	A	0.407197	-0.212955	1.59392e-11
ENSBTAG00000022167	DERA	Chr5	94006820	5:94037023:G:A	Chr5	94037023	G	A	0.0435606	4.63945e-07	1.93506e-08
ENSBTAG00000014175	STRAP	Chr5	94039904	5:94006893:G:T	Chr5	94006893	T	G	0.200758	0.165662	0.00396967
ENSBTAG00000006036	ERP27	Chr5	94967134	5:95031071:G:A	Chr5	95031071	G	A	0.253788	0.389009	7.05547e-07
ENSBTAG00000019722	GUCY2C	Chr5	95172752	5:95926477:C:T	Chr5	95926477	C	T	0.121212	-0.416912	0.0221698
ENSBTAG00000015562	PLBD1	Chr5	95273953	5:95276931:C:T	Chr5	95276931	C	T	0.418561	0.133147	3.07941e-06
ENSBTAG00000050379	U6	Chr5	95392762	5:94414452:T:A	Chr5	94414452	T	A	0.5	0.166612	0.0206028
ENSBTAG00000036078	EMP1	Chr5	96654177	5:96755236:CT:C	Chr5	96755236	C	CT	0.348485	-0.17115	0.0135271
ENSBTAG00000005868	HEBP1	Chr5	96875315	5:96890648:T:C	Chr5	96890648	T	C	0.242424	-0.279882	1.19023e-11
ENSBTAG00000002362	APOLD1	Chr5	97051826	5:97049843:AAACT:A	Chr5	97049843	AAACT	A	0.117424	0.377145	1.69847e-06
ENSBTAG00000010763	DUSP16	Chr5	97282683	5:97463525:A:G	Chr5	97463525	A	G	0.0719697	0.479746	2.95532e-05
ENSBTAG00000008721	MANSC1	Chr5	97454274	5:97419520:C:CTA	Chr5	97419520	C	CTA	0.13447	-0.663576	2.52016e-21
ENSBTAG00000011761	LRP6	Chr5	97526604	5:96827074:T:C	Chr5	96827074	T	C	0.0511364	-0.337801	2.1684e-05
ENSBTAG00000014605	ETV6	Chr5	98225335	5:98083241:C:T	Chr5	98083241	C	T	0.280303	-0.12015	0.000527867
ENSBTAG00000052681	SMIM10L1	Chr5	98571403	5:98419772:G:A	Chr5	98419772	A	G	0.378788	-0.256147	4.17084e-05
ENSBTAG00000009663	YBX3	Chr5	98853393	5:98858325:T:C	Chr5	98858325	T	C	0.0909091	-0.349341	1.26144e-06
ENSBTAG00000019235	MAGOHB	Chr5	98952627	5:98944446:G:A	Chr5	98944446	A	G	0.231061	0.233305	3.70922e-09
ENSBTAG00000009252	KLRA1	Chr5	98969138	5:98968746:G:A	Chr5	98968746	G	A	0.102273	0.754236	3.9766e-06
ENSBTAG00000049367	NA	Chr5	99171198	5:98597092:C:T	Chr5	98597092	C	T	0.176136	0.273552	0.00146481
ENSBTAG00000054018	NA	Chr5	99253173	5:99099259:T:G	Chr5	99099259	G	T	0.4375	-0.503218	2.22848e-06
ENSBTAG00000052486	NA	Chr5	99353522	5:99093100:A:G	Chr5	99093100	A	G	0.176136	-0.381815	0.00355783
ENSBTAG00000052514	NA	Chr5	99387873	5:99005235:G:GTT	Chr5	99005235	GTT	G	0.183712	0.330871	1.16591e-06
ENSBTAG00000049823	NA	Chr5	99487513	5:99503516:C:T	Chr5	99503516	C	T	0.465909	0.285169	0.0235437
ENSBTAG00000052658	NKG2A	Chr5	99539091	5:99488393:T:C	Chr5	99488393	T	C	0.109848	-0.376981	0.00229002
ENSBTAG00000038843	NKG2C	Chr5	99552956	5:99550891:C:CAA	Chr5	99550891	C	CAA	0.0776515	0.59777	2.78173e-07
ENSBTAG00000004917	KLRK1	Chr5	99603138	5:99643519:C:T	Chr5	99643519	T	C	0.438931	-0.28287	2.07747e-09
ENSBTAG00000046389	KLRD1	Chr5	99660385	5:99695316:A:G	Chr5	99695316	A	G	0.36553	0.205277	0.00182633
ENSBTAG00000000966	NA	Chr5	99678614	5:98920274:T:C	Chr5	98920274	C	T	0.38447	0.298957	0.00228794
ENSBTAG00000030426	NA	Chr5	99752814	5:99989665:C:A	Chr5	99989665	A	C	0.231061	-0.217819	0.000380239
ENSBTAG00000011765	GABARAPL1	Chr5	99773990	5:99773277:C:CCT	Chr5	99773277	CCT	C	0.318182	0.243981	3.18435e-06
ENSBTAG00000014546	CLEC7A	Chr5	99833308	5:99872221:A:T	Chr5	99872221	T	A	0.378788	-0.103078	0.000262441
ENSBTAG00000030424	CLEC1A	Chr5	99860313	5:99867603:C:T	Chr5	99867603	T	C	0.36553	-0.185601	1.7685e-11
ENSBTAG00000012815	CLEC12A	Chr5	99947297	5:99958912:T:TTCC	Chr5	99958912	T	TTCC	0.242424	-0.182983	3.39556e-12
ENSBTAG00000046980	KLRF2	Chr5	100060577	5:100060418:TA:T	Chr5	100060418	TA	T	0.227273	0.906548	6.0275e-22
ENSBTAG00000055140	NA	Chr5	100069712	5:100060418:TA:T	Chr5	100060418	TA	T	0.227273	0.539662	1.48409e-14
ENSBTAG00000006851	NA	Chr5	100099709	5:100619204:G:A	Chr5	100619204	G	A	0.125	-0.0734481	0.0041274
ENSBTAG00000049487	NA	Chr5	100127741	5:100131874:C:T	Chr5	100131874	C	T	0.318182	0.147439	1.39163e-05
ENSBTAG00000049573	bta-mir-12002b	Chr5	100145448	5:100112188:A:AC	Chr5	100112188	A	AC	0.316288	0.118789	3.25596e-08
ENSBTAG00000012026	NA	Chr5	100181623	5:100134287:A:AAC	Chr5	100134287	AAC	A	0.498106	0.123676	0.000604603
ENSBTAG00000037534	KLRF1	Chr5	100238336	5:100259791:G:A	Chr5	100259791	A	G	0.418561	0.328609	4.87862e-16
ENSBTAG00000039980	CLECL1	Chr5	100319679	5:100238268:A:T	Chr5	100238268	A	T	0.0284091	-0.159801	1.57242e-09
ENSBTAG00000053740	NA	Chr5	100406644	5:100428023:TA:T	Chr5	100428023	TA	T	0.357955	-0.230933	0.000117834
ENSBTAG00000052683	U6	Chr5	100473349	5:99916989:T:G	Chr5	99916989	T	G	0.382576	-0.0975528	0.00801882
ENSBTAG00000046324	NA	Chr5	100506412	5:99654435:A:ACC	Chr5	99654435	ACC	A	0.42803	0.100965	0.00126428
ENSBTAG00000049220	NA	Chr5	100843160	5:100784050:A:AT	Chr5	100784050	A	AT	0.325758	-0.21043	3.34336e-08
ENSBTAG00000018137	A2M	Chr5	100873613	5:100784050:A:AT	Chr5	100784050	A	AT	0.325758	-0.177786	2.13397e-11
ENSBTAG00000013640	KLRG1	Chr5	100964339	5:100962718:G:A	Chr5	100962718	G	A	0.142045	7.85396e-08	2.56706e-13
ENSBTAG00000018207	M6PR	Chr5	100984955	5:100967755:A:T	Chr5	100967755	T	A	0.210227	-0.185766	3.07825e-05
ENSBTAG00000018205	PHC1	Chr5	101017135	5:101477486:C:T	Chr5	101477486	C	T	0.164773	0.264828	6.82816e-05
ENSBTAG00000004556	SLC2A3	Chr5	101451219	5:101589610:C:T	Chr5	101589610	C	T	0.157197	0.236096	1.88342e-12
ENSBTAG00000019741	C3AR1	Chr5	101575901	5:101575261:A:G	Chr5	101575261	A	G	0.0738636	-0.45487	0.000503076
ENSBTAG00000038490	CLEC4A	Chr5	101616710	5:101616049:C:T	Chr5	101616049	C	T	0.441288	-0.234097	5.92339e-24
ENSBTAG00000023635	CLEC6A	Chr5	101642769	5:101646990:C:T	Chr5	101646990	T	C	0.401515	0.308617	4.40065e-28
ENSBTAG00000039347	CLEC4D	Chr5	101685007	5:100941140:C:A	Chr5	100941140	C	A	0.452652	0.175609	0.00209665
ENSBTAG00000012185	CLEC4E	Chr5	101710556	5:102487274:C:A	Chr5	102487274	A	C	0.234848	-0.269872	0.000214958
ENSBTAG00000019669	CD163	Chr5	101786079	5:101747623:A:G	Chr5	101747623	G	A	0.318182	-0.199826	0.00205593
ENSBTAG00000053242	NA	Chr5	101831737	5:101223795:GA:G	Chr5	101223795	G	GA	0.138258	-0.395476	0.00636278
ENSBTAG00000051330	WC-7	Chr5	102009962	5:102378930:A:C	Chr5	102378930	C	A	0.450758	0.207978	0.0241322
ENSBTAG00000048875	NA	Chr5	102086749	5:102609563:A:G	Chr5	102609563	A	G	0.159091	0.197603	2.2147e-11
ENSBTAG00000052355	WC1-12	Chr5	102220412	5:102204703:T:A	Chr5	102204703	A	T	0.337121	-0.243378	1.05355e-19
ENSBTAG00000024318	NA	Chr5	102477518	5:103197617:G:A	Chr5	103197617	G	A	0.477273	-0.222522	1.09783e-05
ENSBTAG00000052270	NA	Chr5	102559629	5:102539767:G:A	Chr5	102539767	G	A	0.0416667	1.5708	2.0364e-10
ENSBTAG00000052511	NA	Chr5	102615132	5:102553662:C:CTCAGT	Chr5	102553662	C	CTCAGT	0.467803	0.556099	1.56555e-19
ENSBTAG00000050603	WC1.3	Chr5	102694488	5:102604658:AATTATATAATAGATTACCCACAG:A	Chr5	102604658	AATTATATAATAGATTACCCACAG	A	0.337121	0.213455	0.000638749
ENSBTAG00000049861	WC1	Chr5	102819373	5:103140165:C:G	Chr5	103140165	C	G	0.092803	-0.313879	0.00431842
ENSBTAG00000039256	NA	Chr5	102863546	5:102651584:C:T	Chr5	102651584	C	T	0.119318	0.64024	9.51758e-07
ENSBTAG00000050749	NA	Chr5	103003566	5:103142791:C:A	Chr5	103142791	C	A	0.0662879	-0.252172	7.80069e-05
ENSBTAG00000010490	PEX5	Chr5	103195053	5:104080910:A:T	Chr5	104080910	A	T	0.0246212	-0.440818	0.00415078
ENSBTAG00000016204	C1RL	Chr5	103273389	5:103302093:GCCACCTCTTCTTAATATCT:G	Chr5	103302093	GCCACCTCTTCTTAATATCT	G	0.390152	0.119989	0.00214191
ENSBTAG00000008612	C1R	Chr5	103358823	5:103197299:AT:A	Chr5	103197299	AT	A	0.0719697	-0.547265	6.93131e-11
ENSBTAG00000013123	PHB2	Chr5	103493144	5:103492620:T:C	Chr5	103492620	T	C	0.121212	0.10466	0.00552371
ENSBTAG00000044624	U7	Chr5	103520433	5:103538380:C:T	Chr5	103538380	C	T	0.13447	0.555756	2.0364e-05
ENSBTAG00000018828	ATN1	Chr5	103529979	5:104056913:G:A	Chr5	104056913	A	G	0.458333	-0.120557	0.0228202
ENSBTAG00000019782	TPI1	Chr5	103583951	5:103795708:C:CT	Chr5	103795708	C	CT	0.325758	-0.146545	0.000414326
ENSBTAG00000019780	USP5	Chr5	103598534	5:103713661:AC:A	Chr5	103713661	AC	A	0.246212	0.236402	6.31897e-07
ENSBTAG00000003598	P3H3	Chr5	103623450	5:104344328:C:T	Chr5	104344328	C	T	0.200758	0.249583	0.0127011
ENSBTAG00000003255	CD4	Chr5	103654878	5:103653293:T:TC	Chr5	103653293	TC	T	0.471483	0.222722	8.73236e-07
ENSBTAG00000034295	LAG3	Chr5	103672761	5:103676141:C:T	Chr5	103676141	T	C	0.181818	0.214099	9.75552e-12
ENSBTAG00000018451	PTMS	Chr5	103679056	5:103680967:C:T	Chr5	103680967	T	C	0.19112	0.267444	7.98235e-13
ENSBTAG00000014931	MLF2	Chr5	103691195	5:103698025:G:C	Chr5	103698025	C	G	0.032197	0.497425	8.92988e-16
ENSBTAG00000011111	COPS7A	Chr5	103719840	5:103713648:C:CA	Chr5	103713648	C	CA	0.267045	0.35413	3.282e-08
ENSBTAG00000017064	ING4	Chr5	103778088	5:103794161:C:T	Chr5	103794161	C	T	0.442966	-0.202118	0.000153562
ENSBTAG00000034246	ACRBP	Chr5	103786618	5:103789270:G:A	Chr5	103789270	G	A	0.340909	0.379665	3.80027e-17
ENSBTAG00000014733	NOP2	Chr5	103848171	5:104108154:C:T	Chr5	104108154	C	T	0.102273	0.396968	2.62368e-09
ENSBTAG00000030369	IFFO1	Chr5	103857365	5:103870194:G:A	Chr5	103870194	A	G	0.125	-0.164249	0.0216826
ENSBTAG00000014731	GAPDH	Chr5	103874824	5:104073315:G:GT	Chr5	104073315	GT	G	0.0625	0.123431	0.00503394
ENSBTAG00000014729	MRPL51	Chr5	103902392	5:103894735:C:T	Chr5	103894735	T	C	0.380682	-0.243206	1.20096e-13
ENSBTAG00000014728	TAPBPL	Chr5	103929825	5:104024845:C:T	Chr5	104024845	C	T	0.092803	0.716853	4.50159e-15
ENSBTAG00000014764	CD9	Chr5	104159392	5:104103512:G:C	Chr5	104103512	G	C	0.217803	0.340498	2.80173e-10
ENSBTAG00000012265	VWF	Chr5	104221025	5:104260596:AC:A	Chr5	104260596	AC	A	0.30303	-0.181123	0.00446932
ENSBTAG00000040065	RAD51AP1	Chr5	105595893	5:105687543:CAT:C	Chr5	105687543	CAT	C	0.162879	-0.30898	9.03541e-06
ENSBTAG00000053303	C5H12orf4	Chr5	105596336	5:105600674:C:A	Chr5	105600674	C	A	0.392045	0.333295	2.76783e-06
ENSBTAG00000016649	CCND2	Chr5	105787132	5:106484150:C:T	Chr5	106484150	C	T	0.356195	0.183728	0.00608432
ENSBTAG00000000275	PARP11	Chr5	106112460	5:106220401:A:G	Chr5	106220401	A	G	0.407197	-0.209967	0.000300367
ENSBTAG00000018940	CRACR2A	Chr5	106146547	5:106187387:T:TAA	Chr5	106187387	T	TAA	0.454545	0.353234	3.5725e-13
ENSBTAG00000049163	TSPAN9	Chr5	106745949	5:106800624:C:T	Chr5	106800624	C	T	0.102273	0.297627	0.000324833
ENSBTAG00000015879	TULP3	Chr5	106875967	5:106872518:A:G	Chr5	106872518	A	G	0.236742	-0.402568	8.45657e-24
ENSBTAG00000015878	RHNO1	Chr5	106886490	5:106874779:T:C	Chr5	106874779	T	C	0.17803	-0.176153	1.60353e-07
ENSBTAG00000011902	WASHC1	Chr5	107014573	5:107096790:C:T	Chr5	107096790	C	T	0.318182	0.215876	1.26942e-07
ENSBTAG00000020472	KDM5A	Chr5	107290351	5:107300077:C:CT	Chr5	107300077	C	CT	0.225379	0.27	0.000105526
ENSBTAG00000000049	CCDC77	Chr5	107294770	5:107062605:C:T	Chr5	107062605	C	T	0.467803	0.246512	1.04369e-07
ENSBTAG00000005225	RAD52	Chr5	107734428	5:107807303:G:A	Chr5	107807303	G	A	0.263258	0.364258	2.71966e-09
ENSBTAG00000013658	ERC1	Chr5	107784434	5:107963637:T:C	Chr5	107963637	T	C	0.439394	0.178677	0.0120006
ENSBTAG00000011067	IL17RA	Chr5	108808132	5:108810026:A:G	Chr5	108810026	A	G	0.429924	-0.1198	2.73768e-07
ENSBTAG00000016995	HDHD5	Chr5	108849972	5:108834530:G:A	Chr5	108834530	G	A	0.181818	0.317592	2.51488e-08
ENSBTAG00000017313	ADA2	Chr5	108879525	5:108879447:C:T	Chr5	108879447	C	T	0.359848	-0.275116	2.95605e-26
ENSBTAG00000009704	CECR2	Chr5	108937843	5:108878932:C:T	Chr5	108878932	C	T	0.28626	-0.223466	3.9676e-05
ENSBTAG00000013956	BCL2L13	Chr5	109082266	5:109011675:C:T	Chr5	109011675	C	T	0.0984849	-0.189894	0.0174306
ENSBTAG00000013988	BID	Chr5	109154244	5:108169797:G:A	Chr5	108169797	G	A	0.293561	0.229409	2.11511e-05
ENSBTAG00000048271	MICAL3	Chr5	109274608	5:108678359:T:TA	Chr5	108678359	T	TA	0.17803	3.34076e-07	1.37164e-08
ENSBTAG00000011826	PEX26	Chr5	109353913	5:109309379:T:C	Chr5	109309379	C	T	0.496212	0.186874	0.00146454
ENSBTAG00000030257	SH3BP1	Chr5	109484520	5:109669324:G:T	Chr5	109669324	G	T	0.166667	0.207682	0.000102851
ENSBTAG00000015089	LGALS1	Chr5	109512490	5:109488320:C:T	Chr5	109488320	C	T	0.0871212	0.318985	2.41391e-18
ENSBTAG00000051118	NOL12	Chr5	109519066	5:109526943:G:C	Chr5	109526943	G	C	0.301136	-0.439711	2.43553e-29
ENSBTAG00000002539	TRIOBP	Chr5	109532806	5:109386186:G:T	Chr5	109386186	G	T	0.253788	-0.34252	2.38741e-10
ENSBTAG00000010789	ANKRD54	Chr5	109653939	5:109662736:T:G	Chr5	109662736	T	G	0.267045	0.266268	0.0220391
ENSBTAG00000015268	PICK1	Chr5	109834676	5:109852035:G:C	Chr5	109852035	C	G	0.496212	-0.451496	4.80892e-12
ENSBTAG00000047582	CSNK1E	Chr5	110083317	5:111050507:T:C	Chr5	111050507	T	C	0.153409	0.40416	0.0156156
ENSBTAG00000006588	CBY1	Chr5	110294845	5:110307377:G:T	Chr5	110307377	G	T	0.267045	0.259587	7.80672e-20
ENSBTAG00000010157	TOMM22	Chr5	110314072	5:110369778:G:A	Chr5	110369778	G	A	0.208333	0.21012	0.000195392
ENSBTAG00000003693	SUN2	Chr5	110377270	5:110355703:G:A	Chr5	110355703	G	A	0.401141	0.125326	1.35267e-19
ENSBTAG00000046724	CBX6	Chr5	110475491	5:110445986:G:A	Chr5	110445986	A	G	0.431298	-0.184281	9.00458e-08
ENSBTAG00000007755	APOBEC3H	Chr5	110559227	5:110567508:A:G	Chr5	110567508	A	G	0.094697	0.499708	6.0385e-28
ENSBTAG00000003228	RPL3	Chr5	110752075	5:110946461:C:T	Chr5	110946461	C	T	0.030303	-0.286068	2.327e-07
ENSBTAG00000019828	TAB1	Chr5	110829262	5:110829572:C:T	Chr5	110829572	C	T	0.395833	-0.351727	2.45826e-17
ENSBTAG00000017439	MIEF1	Chr5	110930790	5:111606361:T:C	Chr5	111606361	T	C	0.185606	-0.335272	0.000976293
ENSBTAG00000017462	ATF4	Chr5	110946625	5:110781318:T:C	Chr5	110781318	T	C	0.125	0.402773	3.88761e-08
ENSBTAG00000017463	RPS19BP1	Chr5	110954950	5:111059336:AGAGCAAC:A	Chr5	111059336	AGAGCAAC	A	0.306084	-0.141079	2.02413e-08
ENSBTAG00000000077	ADSL	Chr5	111674845	5:111501233:C:CA	Chr5	111501233	C	CA	0.462121	0.139142	0.00215277
ENSBTAG00000009624	SGSM3	Chr5	111705768	5:111780815:G:A	Chr5	111780815	G	A	0.13447	-0.642083	1.78554e-16
ENSBTAG00000002630	MRTFA	Chr5	111851021	5:111792688:C:T	Chr5	111792688	T	C	0.13447	0.203293	0.000349863
ENSBTAG00000006200	SLC25A17	Chr5	112086674	5:112183320:G:A	Chr5	112183320	G	A	0.420455	0.139366	6.13183e-05
ENSBTAG00000006202	ST13	Chr5	112115729	5:112017115:A:G	Chr5	112017115	A	G	0.320076	0.0793323	0.00512837
ENSBTAG00000006204	XPNPEP3	Chr5	112115957	5:112119322:T:TA	Chr5	112119322	T	TA	0.329545	-0.277661	7.19795e-05
ENSBTAG00000012481	RANGAP1	Chr5	112425046	5:112402104:A:G	Chr5	112402104	A	G	0.149621	-0.230466	0.00111822
ENSBTAG00000015109	TOB2	Chr5	112549987	5:112489462:C:G	Chr5	112489462	C	G	0.212121	-0.180309	0.00136434
ENSBTAG00000006423	PHF5A	Chr5	112567981	5:112489462:C:G	Chr5	112489462	C	G	0.212121	-0.311821	1.43571e-18
ENSBTAG00000006429	ACO2	Chr5	112568048	5:112587535:A:G	Chr5	112587535	A	G	0.482955	0.131532	6.04226e-11
ENSBTAG00000005311	POLR3H	Chr5	112629599	5:112628793:C:T	Chr5	112628793	C	T	0.361742	-0.277002	1.0605e-05
ENSBTAG00000004009	PMM1	Chr5	112670817	5:112664767:G:A	Chr5	112664767	G	A	0.462121	0.325538	5.87633e-06
ENSBTAG00000006103	XRCC6	Chr5	112706896	5:112729851:C:T	Chr5	112729851	C	T	0.295455	-0.298806	7.80649e-12
ENSBTAG00000006104	SNU13	Chr5	112743206	5:112653207:G:T	Chr5	112653207	T	G	0.380682	-0.0938502	0.00817209
ENSBTAG00000021173	CCDC134	Chr5	112813755	5:113132044:A:C	Chr5	113132044	A	C	0.107955	0.578803	0.00885755
ENSBTAG00000009956	CENPM	Chr5	112928741	5:112942608:T:TA	Chr5	112942608	T	TA	0.102273	-0.574949	1.67457e-09
ENSBTAG00000009506	NAGA	Chr5	113032754	5:113028499:C:T	Chr5	113028499	T	C	0.356061	0.100898	5.81967e-08
ENSBTAG00000009507	PHETA2	Chr5	113035566	5:112944253:A:C	Chr5	112944253	A	C	0.111742	-0.441776	0.00733334
ENSBTAG00000026502	CYP2D14	Chr5	113094984	5:113066063:AT:A	Chr5	113066063	A	AT	0.359848	0.308188	2.28397e-07
ENSBTAG00000000662	TCF20	Chr5	113195472	5:113140000:T:C	Chr5	113140000	T	C	0.38447	-0.193911	1.05434e-06
ENSBTAG00000005018	NFAM1	Chr5	113347845	5:113340931:C:T	Chr5	113340931	C	T	0.032197	-0.112668	4.39016e-05
ENSBTAG00000016510	RRP7	Chr5	113444152	5:113457603:C:T	Chr5	113457603	C	T	0.223485	-0.273236	1.29249e-07
ENSBTAG00000016516	CYB5R3	Chr5	113498670	5:113507267:A:G	Chr5	113507267	A	G	0.234848	-2.23482e-07	1.54474e-07
ENSBTAG00000026497	A4GALT	Chr5	113537081	5:113536263:T:G	Chr5	113536263	G	T	0.496212	-0.22993	1.09991e-05
ENSBTAG00000001057	ARFGAP3	Chr5	113671084	5:113617898:A:G	Chr5	113617898	G	A	0.456439	-0.151349	0.000339608
ENSBTAG00000019290	PACSIN2	Chr5	113804112	5:113781459:C:T	Chr5	113781459	T	C	0.376894	0.409817	6.98185e-16
ENSBTAG00000012030	TTLL1	Chr5	113862433	5:113860436:G:A	Chr5	113860436	G	A	0.348485	-0.393795	4.73826e-28
ENSBTAG00000049724	NA	Chr5	113882867	5:113932228:C:T	Chr5	113932228	C	T	0.189394	0.288526	0.00263034
ENSBTAG00000002413	MCAT	Chr5	113919965	5:113913731:T:C	Chr5	113913731	T	C	0.382576	0.40528	6.19441e-11
ENSBTAG00000018073	TSPO	Chr5	113927820	5:113929923:G:T	Chr5	113929923	G	T	0.223485	0.120215	8.43115e-10
ENSBTAG00000001708	TTLL12	Chr5	113959663	5:113944170:A:G	Chr5	113944170	A	G	0.445076	-0.188203	4.15999e-16
ENSBTAG00000045957	SAMM50	Chr5	114694986	5:114710975:G:A	Chr5	114710975	A	G	0.292969	0.163932	2.54746e-11
ENSBTAG00000021978	PARVB	Chr5	114752958	5:114778344:A:C	Chr5	114778344	C	A	0.236742	0.38589	3.36066e-12
ENSBTAG00000008057	PARVG	Chr5	114877722	5:114904852:G:A	Chr5	114904852	G	A	0.0397727	0.3551	0.0112164
ENSBTAG00000012425	RTL6	Chr5	115133130	5:115190246:G:A	Chr5	115190246	A	G	0.306818	-0.357991	3.92973e-05
ENSBTAG00000039784	PRR5	Chr5	115268497	5:115348744:A:G	Chr5	115348744	A	G	0.375	-0.13733	0.000197818
ENSBTAG00000006776	KIAA0930	Chr5	115654855	5:115588764:C:T	Chr5	115588764	T	C	0.325095	0.22051	2.56205e-07
ENSBTAG00000010590	FAM118A	Chr5	115707025	5:115705422:A:T	Chr5	115705422	A	T	0.241379	0.450428	3.15003e-16
ENSBTAG00000009351	ATXN10	Chr5	116028708	5:116310275:G:A	Chr5	116310275	G	A	0.268939	0.202112	0.000205629
ENSBTAG00000008063	PPARA	Chr5	116438988	5:116678191:C:T	Chr5	116678191	C	T	0.311787	-0.191694	0.00123554
ENSBTAG00000008065	CDPF1	Chr5	116522344	5:116521684:GC:G	Chr5	116521684	GC	G	0.357955	-0.458087	5.89245e-18
ENSBTAG00000003017	TTC38	Chr5	116584848	5:116598050:A:T	Chr5	116598050	A	T	0.272727	0.306619	1.68451e-14
ENSBTAG00000046654	CERK	Chr5	116943141	5:116918737:T:C	Chr5	116918737	C	T	0.217647	-0.221193	3.97111e-07
ENSBTAG00000012291	TBC1D22A	Chr5	116973679	5:117238401:A:G	Chr5	117238401	A	G	0.0516129	-0.272158	3.63073e-05
ENSBTAG00000048741	NA	Chr5	119267047	5:119246449:A:G	Chr5	119246449	A	G	0.174242	-0.329356	1.1883e-07
ENSBTAG00000049889	ZBED4	Chr5	119288555	5:119927040:C:T	Chr5	119927040	C	T	0.109848	-0.275528	6.37477e-07
ENSBTAG00000046173	ALG12	Chr5	119312093	5:119309597:T:C	Chr5	119309597	C	T	0.420455	-0.205072	0.00289428
ENSBTAG00000047801	CRELD2	Chr5	119312408	5:119611266:G:A	Chr5	119611266	G	A	0.333333	-0.107653	0.000258757
ENSBTAG00000045904	PIM3	Chr5	119348911	5:118787587:A:G	Chr5	118787587	A	G	0.297348	-0.194297	0.000208506
ENSBTAG00000045808	IL17REL	Chr5	119390141	5:119429530:C:G	Chr5	119429530	C	G	0.320076	-0.26746	0.000960196
ENSBTAG00000020341	MOV10L1	Chr5	119477605	5:119456160:A:G	Chr5	119456160	G	A	0.4375	-0.430697	2.59443e-07
ENSBTAG00000009297	PANX2	Chr5	119546565	5:119537920:T:TG	Chr5	119537920	T	TG	0.31749	0.393661	2.32223e-14
ENSBTAG00000000650	TUBGCP6	Chr5	119612001	5:119588413:A:C	Chr5	119588413	C	A	0.311787	-0.204011	5.32242e-08
ENSBTAG00000011000	HDAC10	Chr5	119616810	5:118934680:G:A	Chr5	118934680	G	A	0.13447	0.205055	0.0246137
ENSBTAG00000014966	PLXNB2	Chr5	119666475	5:119667363:GC:G	Chr5	119667363	GC	G	0.285985	0.324342	8.68953e-09
ENSBTAG00000024756	DENND6B	Chr5	119680303	5:119694932:CAG:C	Chr5	119694932	CAG	C	0.416667	-0.168541	0.00187615
ENSBTAG00000018660	PPP6R2	Chr5	119690577	5:119691862:G:GC	Chr5	119691862	G	GC	0.282197	-0.271499	1.12718e-19
ENSBTAG00000021337	SBF1	Chr5	119784086	5:119000839:ATCT:A	Chr5	119000839	ATCT	A	0.295455	0.132573	5.35617e-05
ENSBTAG00000002559	MIOX	Chr5	119793805	5:120013777:C:T	Chr5	120013777	C	T	0.128788	-0.412748	5.91939e-05
ENSBTAG00000017925	LMF2	Chr5	119812020	5:119810331:C:T	Chr5	119810331	T	C	0.429924	-0.39998	1.70163e-19
ENSBTAG00000016050	CHKB	Chr5	119901095	5:119901167:G:C	Chr5	119901167	G	C	0.162879	0.301531	9.46572e-06
ENSBTAG00000016053	ARSA	Chr5	119945935	5:119883112:T:C	Chr5	119883112	C	T	0.422348	-0.219725	3.52286e-10
ENSBTAG00000030180	SHANK3	Chr5	119959167	5:119946169:A:C	Chr5	119946169	C	A	0.358779	-0.182629	7.38583e-10
ENSBTAG00000004876	RABL2B	Chr5	120037422	5:119930908:G:C	Chr5	119930908	C	G	0.445076	0.356149	3.01636e-06
ENSBTAG00000012658	TMA16	Chr6	2141474	6:2084218:CAAATT:C	Chr6	2084218	CAAATT	C	0.299242	0.378526	2.1143e-06
ENSBTAG00000004945	BBS7	Chr6	3385321	6:3376910:G:GT	Chr6	3376910	G	GT	0.25	-0.482262	1.37428e-14
ENSBTAG00000021746	ANXA5	Chr6	3557586	6:3556598:T:G	Chr6	3556598	G	T	0.357955	0.420635	2.2847e-38
ENSBTAG00000012111	PRDM5	Chr6	4526912	6:4504466:A:G	Chr6	4504466	A	G	0.0397727	1.12093	0.0075468
ENSBTAG00000024888	PDE5A	Chr6	5745780	6:6053415:C:A	Chr6	6053415	C	A	0.484848	0.290257	3.20934e-06
ENSBTAG00000017045	FABP2	Chr6	5973346	6:6015409:A:G	Chr6	6015409	A	G	0.386364	0.518031	5.69638e-20
[truncated: 6,004 more rows]
