# Supplementary material for: An organism-wide ATAC-seq peak catalog for the bovine and its use to identify regulatory variants
Source: HighWire-hosted journal article supplement (doi:10.1101/gr.277947.123), 2023-09-26
Supplement: Supplemental_Table_S13.xlsx [file Supplemental_Table_S13.xlsx]

## Sheet: STable S13_overlap_eQTL_ATAC
Suppl. Table S13: The significance of the overlap between cis-eQTL credible sets and ATAC-seq peaks was evaluated by permutation following Trynka et al. (2015). Analyses were conducted by NMF component (assigning peaks to their dominant component; Meulemen et al. 2020).
Overlap between credible sets and ATAC-seq peaks with real and permuted data
		BLOOD								LIVER
NMF component		Total number of eQTL	Total number of credible sets	Unconditional		Conditional				Total number of eQTL	Total number of credible sets	Unconditional		Conditional
				Number of cred sets in peak: REAL	Average Number of cred sets in peak: PERM	Number of cred sets in proximal peak: REAL	Average Number of cred sets in proximal peak: PERM	Number of cred sets in distal peak: REAL	Average Number of cred sets in distal peak: PERM			Number of cred sets in peak: REAL	Average Number of cred sets in peak: PERM	Number of cred sets in proximal peak: REAL	Average Number of cred sets in proximal peak: PERM	Number of cred sets in distal peak: REAL	Average Number of cred sets in distal peak: PERM
Central nervous system	1	7817	(7687)336892	1231	1135.43	174	167.908	1057	976.766	6172	(6101)271872	959	881.31	121	127.137	838	760.095
Ruminal epithelium	2			1341	1277.96	132	144.402	1209	1137.65			1066	1002.98	113	116.492	953	888.443
Immune system	3			1906	1603.92	308	278.358	1598	1341.69			1173	1072.29	187	175.572	986	904.914
Mammary gland	4			1277	1176.7	187	186.752	1090	999.235			949	921.689	134	145.762	815	780.585
Digestive tract	5			646	582.284	52	49.3541	594	533.349			525	482.727	48	42.5635	477	441.282
Lower respiratory	6			1162	1051.9	142	116.907	1020	938.319			897	825.363	85	83.3439	812	741.636
Cerebellum	7			1047	973.16	152	132.439	895	850.939			820	742.439	105	101.974	715	646.136
Testis	8			954	932.543	122	131.224	832	812.88			817	757.147	122	109.035	695	652.867
Upper respiratory	9			803	750.064	57	62.9385	746	688.919			642	606.404	50	57.4529	592	550.084
Muscle	10			903	842.256	111	108.584	792	742.106			697	629.567	84	78.0975	613	556.825
Endocrine	11			823	780.405	57	56.3933	766	723.231			628	624.03	57	50.8834	571	575.992
Liver	12			707	628.995	81	70.8477	626	558.224			848	636.188	115	89.1067	733	553.405
8-cell embryo	13			889	826.725	135	128.291	754	708.154			711	645.178	106	104.338	605	549.21
Morular embryo	14			1849	1775.86	183	214.008	1666	1570.09			1515	1410.86	154	171.418	1361	1241.1
ICM embryo	15			259	285.457	18	25.0732	241	260.054			245	225.835	22	21.7926	223	203.679
Undefined	16			428	402.221	31	37.0514	397	367.047			377	329.088	29	29.6711	348	300.627
Ubiquitous				3304	2800.63	1940	1677.95	1364	1247.98			2531	2149.43	1465	1295.95	1066	947.686
	p values
				BLOOD			LIVER
				Unconditioned	Conditional proximal	Conditional distal	Unconditioned	Conditional proximal	Conditional distal
Central nervous system	1			0	0.2882	0.0003	0.0002	0.7706	0.0001
Ruminal epithelium	2			0.0049	0.9004	0.0016	0.0024	0.6637	0.0025
Immune system	3			0	0.0106	0	0	0.1407	0
Mammary gland	4			0	0.5073	0	0.0816	0.91	0.0397
Digestive tract	5			0.0004	0.3552	0.0003	0.0073	0.1757	0.0168
Lower respiratory	6			0	0.0036	0.0001	0.0006	0.4378	0.0001
Cerebellum	7			0.0001	0.0231	0.0176	0	0.3743	0.0001
Testis	8			0.1678	0.8482	0.1922	0.0011	0.0648	0.0118
Upper respiratory	9			0.0069	0.8351	0.0017	0.028	0.8994	0.0092
Muscle	10			0.0014	0.4081	0.0073	0.0001	0.2127	0.0008
Endocrine	11			0.0232	0.4875	0.0201	0.4197	0.1723	0.6144
Liver	12			0.0001	0.0853	0.0001	0	0.0003	0
8-cell embryo	13			0.0023	0.2459	0.0137	0.0003	0.4408	0.0011
Morular embryo	14			0.0037	0.9967	0.0004	0	0.9602	0
ICM embryo	15			0.9731	0.9656	0.922	0.072	0.5221	0.0584
Undefined	16			0.0526	0.896	0.0287	0.0001	0.5885	0.0003
Ubiquitous				0	0	0	0	0	0
	FOLD ENRICHEMENT (REAL/PERM)
				BLOOD			LIVER
				Unconditioned	Conditional proximal	Conditional distal	Unconditioned	Conditional proximal	Conditional distal
Central nervous system	1			1.08418	1.03628	1.08214	1.08817	0.951729	1.10249
Ruminal epithelium	2			1.04933	0.914113	1.06272	1.06286	0.970023	1.07266
Immune system	3			1.18834	1.10649	1.19104	1.0939	1.06509	1.08961
Mammary gland	4			1.08521	1.00133	1.09083	1.02964	0.919305	1.04409
Digestive tract	5			1.10948	1.05361	1.11372	1.08755	1.12773	1.08094
Lower respiratory	6			1.10464	1.21464	1.08705	1.08683	1.01987	1.09488
Cerebellum	7			1.07583	1.1477	1.05178	1.10443	1.02968	1.10658
Testis	8			1.02305	0.929709	1.02352	1.07903	1.11891	1.06454
Upper respiratory	9			1.07054	0.905646	1.08286	1.05872	0.870278	1.0762
Muscle	10			1.0721	1.02225	1.06723	1.10708	1.07558	1.10088
Endocrine	11			1.05454	1.01076	1.05914	1.00632	1.12021	0.991333
Liver	12			1.12395	1.1433	1.12141	1.33291	1.29059	1.32453
8-cell embryo	13			1.07534	1.0523	1.06474	1.10204	1.01593	1.10158
Morular embryo	14			1.0412	0.855107	1.06108	1.07381	0.898388	1.0966
ICM embryo	15			0.9072	0.717898	0.92673	1.08493	1.00952	1.09486
Undefined	16			1.06408	0.836676	1.0816	1.14553	0.977382	1.15758
Ubiquitous				1.17975	1.15617	1.09297	1.17752	1.13045	1.12485
